# Supplementary material for: Chemoprevention with Cyclooxygenase and Epidermal Growth Factor Receptor Inhibitors in Familial Adenomatous Polyposis Patients: mRNA Signatures of Duodenal Neoplasia
Source: Oxford University Press journal article supplement (doi:10.1158/1940-6207.capr-17-0130), 2017-11-06
Supplement: 182746_2_supp_4285225_swns35.xlsx [file 182746_2_supp_4285225_swns35.xlsx]

## Sheet: Legend
Supplemental Table 1 Legend
DrugNormBase	Paired uninvolved duodenum at baseline from patients treated with drug
PlaceboNormBase	Paired uninvolved duodenum at baseline from patients treated with placebo
DrugNormEnd	Paired uninvolved duodenum at endpoint from patients treated with drug
PlaceboNormEnd	Paired uninvolved duodenum at endpoint from patients treated with placebo
DrugPolypEnd	Duodenal adenomas at endpoint from patients treated with drug
PlaceboPolypEnd	Duodenal adenomas at endpoint from patients treated with placebo
Fold	Fold change from paired baseline
RPKM	Reads per kilobase of gene length per million total reads
FDR	False discovery rate
Tab 2 (BaseEndNorm)	Paired uninvolved duodenum comparisons between endpoint and baseline
Tab 3 (BaseEndAllPolyp)	All endpoint duodenal adenomas compared to paired uninvolved duodenum at baseline (28 polyps total, 15 drug and 13 placebo)
Tab 4 (BaseEndMinus2mmPolyp)	Endpoint duodenal adenomas ≥ 3 mm compared to paired uninvolved duodenum at baseline (23 polyps total, 12 drug and 11 placebo)
Tab 5 (BaseEndPolyp50%Purity)	Endpoint duodenal adenomas ≥ 50% purity compared to paired uninvolved duodenum at baseline (23 polyps total, 13 drug and 10 placebo)
Numbers of Differentially Expressed Genes for Each Comparison
Treatment	Analysis	Number genes 1.5 fold			Number genes 2.0 fold
		All samples	Polyps ≥ 3mm	Polyps ≥ 50% Purity	All samples	Polyps ≥ 3mm	Polyps ≥ 50% Purity
Placebo	Endpoint uninvolved vs. baseline uninvolved	343	NA	NA	11	NA	NA
Drug	Endpoint uninvolved vs. baseline uninvolved	31	NA	NA	1	NA	NA
Placebo	Endpoint polyp vs. baseline uninvolved	1846	2222	2637	393	534	977
Drug	Endpoint polyp vs. baseline uninvolved	195	323	239	4	8	51

## Sheet: BaseEndNorm
Gene Name	Description	RPKM_DrugNormBase	RPKM_DrugNormEnd	DrugNormEndBase_Fold	DrugNormEndBase_FDR		RPKM_PlaceboNormBase	RPKM_PlaceboNormEnd	PlaceboNormEndBase_Fold	PlaceboNormEndBase_FDR
SEPHS2	selenophosphate synthetase 2	45.3024	32.5358	1.26486	0.169741		56.3366	26.203	2.03108	2.19122e-13
QDPR	quinoid dihydropteridine reductase	8.88619	7.81653	1.10275	0.666849		11.5713	6.07663	1.78807	1.61829e-07
HIST1H4E	histone cluster 1, H4e	366.483	244	1.41981	3.80609e-06		367.205	209.788	1.74701	5.49189e-16
ACAA1	acetyl-CoA acyltransferase 1	82.7155	60.104	1.22134	0.294918		99.4998	55.7506	1.70576	2.25926e-08
HRCT1	histidine rich carboxyl terminus 1	5.69531	2.35151	1.26456	0.275771		5.1886	2.69862	1.68075	4.01218e-05
U2AF1	U2 small nuclear RNA auxiliary factor 1	5.63852	4.12478	1.30179	0.0240016		5.26563	2.99512	1.67053	4.00685e-08
MANBAL	mannosidase beta like	16.2556	13.843	1.1286	0.570056		16.7689	10.3606	1.59984	1.72556e-07
LGALS3	galectin 3	268.213	213.159	1.10011	0.717509		319.772	191.664	1.5995	3.15091e-06
MRFAP1	Morf4 family associated protein 1	48.3795	45.7539	1.03091	0.920401		56.1676	35.3977	1.58852	1.07033e-07
NUDT9	nudix hydrolase 9	17.0429	13.962	1.16139	0.323529		18.6639	11.8748	1.58625	1.94589e-10
PSMC5	proteasome 26S subunit, ATPase 5	28.2069	22.6	1.19058	0.151423		27.8698	17.5116	1.57785	7.38797e-07
PMVK	phosphomevalonate kinase	11.5602	12.3373	0.937121	0.839504		15.0555	9.3098	1.57099	1.04382e-05
TARDBP	TAR DNA binding protein	18.3925	12.8495	1.35344	0.00762242		15.6875	10.0308	1.5638	5.35034e-07
PHLDA2	pleckstrin homology like domain family A member 2	3.32068	2.33745	1.26377	0.213283		3.63219	1.997	1.56362	0.00220808
SLC25A5	solute carrier family 25 member 5	377.587	323.63	1.11911	0.58465		509.438	314.606	1.56285	4.14986e-06
SLC25A5-AS1	SLC25A5 antisense RNA 1	10.334	9.12913	1.08645	0.750156		15.2099	9.05426	1.55765	0.000171257
ATP1B3	ATPase Na+/K+ transporting subunit beta 3	69.081	62.3743	1.04673	0.896611		87.0401	56.1727	1.54816	6.57092e-08
G0S2	G0/G1 switch 2	3.45015	2.54155	1.24335	0.213249		5.33934	3.28307	1.54459	0.000224813
PDLIM1	PDZ and LIM domain 1	90.2419	66.7696	1.24158	0.142379		94.1013	60.8843	1.53643	4.5785e-10
PI15	peptidase inhibitor 15	0.499993	0.745448	0.822276	0.399037		0.428886	0.190152	1.52494	0.0114773
SDSL	serine dehydratase like	7.24319	5.46551	1.19858	0.359671		7.42531	4.74937	1.52304	5.68205e-05
ABTB1	ankyrin repeat and BTB domain containing 1	5.22051	3.66991	1.3166	0.0882883		5.36528	3.41937	1.50513	0.000380191
PRKCD	protein kinase C delta	19.8728	14.2529	1.26139	0.154974		18.9793	12.6119	1.50092	1.36292e-05
ZG16B	zymogen granule protein 16B	17.2404	8.69254	1.16055	0.508748		3.72226	8.12574	0.666959	0.00812947
ARRB2	arrestin beta 2	17.9005	30.1716	0.674906	0.00562697		20.7812	32.8708	0.666846	1.34058e-09
NBR2	neighbor of BRCA1 gene 2 (non-protein coding)	2.17408	2.77811	0.844188	0.430005		1.84543	3.09982	0.666578	0.000608817
SOS1	SOS Ras/Rac guanine nucleotide exchange factor 1	13.6993	17.6697	0.787468	0.0685577		10.7347	17.0989	0.666139	2.21842e-05
PPP6C	protein phosphatase 6 catalytic subunit	14.9994	22.7285	0.672519	4.85304e-07		14.0796	22.4523	0.666126	6.15781e-08
CS	citrate synthase	35.5002	49.7587	0.726594	0.00267283		31.3333	49.4448	0.665478	3.44789e-10
LCP2	lymphocyte cytosolic protein 2	9.1008	11.2384	0.809929	0.181786		7.73065	12.4068	0.665392	2.72106e-05
LSR	lipolysis stimulated lipoprotein receptor	29.4856	32.7544	0.851992	0.405298		21.9573	34.2639	0.665359	5.45599e-12
AES	amino-terminal enhancer of split	69.1834	98.7887	0.693239	2.97314e-14		64.7992	101.835	0.664976	2.29109e-07
SOX13	SRY-box 13	5.57456	6.7837	0.82814	0.0520023		5.29305	8.63278	0.664758	1.71662e-05
LAMP3	lysosomal associated membrane protein 3	1.04228	1.32145	0.816259	0.305021		0.814287	1.41082	0.664671	0.00313424
PROSER1	proline and serine rich 1	4.68873	5.32113	0.887719	0.626391		2.90105	4.63142	0.664577	7.14755e-05
MMP24-AS1	MMP24 antisense RNA 1	11.4227	15.4304	0.736014	0.000191656		10.1198	16.1681	0.664472	2.7173e-09
RNF39	ring finger protein 39	5.34333	7.64291	0.753915	0.0518754		4.40217	7.24423	0.66445	3.23109e-05
TIAL1	TIA1 cytotoxic granule-associated RNA binding protein-like 1	13.2132	17.936	0.756443	0.0172719		9.93941	15.8888	0.664062	1.77178e-06
SRRM2	serine/arginine repetitive matrix 2	42.2418	42.5558	0.993675	0.987372		25.8917	41.6814	0.66372	8.0137e-05
OAZ2	ornithine decarboxylase antizyme 2	11.6558	19.3259	0.617891	1.63852e-10		11.4489	18.2972	0.663645	2.32006e-08
C6orf136	chromosome 6 open reading frame 136	9.34707	12.0414	0.784272	0.0195582		8.5482	13.664	0.663448	1.51196e-07
SRCAP	Snf2-related CREBBP activator protein	8.31282	7.67355	1.051	0.867793		5.5434	8.79862	0.663417	2.47092e-07
PSME3	proteasome activator subunit 3	10.7527	16.0457	0.696043	0.000232674		9.05163	14.331	0.663394	2.9887e-10
CYP2B6	cytochrome P450 family 2 subfamily B member 6	2.2874	2.88422	0.840827	0.440701		2.16343	3.86267	0.663335	0.0019828
SNX32	sorting nexin 32	1.73495	2.45018	0.771399	0.133257		1.97883	3.38102	0.663242	0.00112669
MRPL4	mitochondrial ribosomal protein L4	6.79797	10.4478	0.672291	7.44536e-07		6.74802	10.8276	0.663118	5.40212e-06
TACC2	transforming acidic coiled-coil containing protein 2	7.83731	7.80548	0.970419	0.932003		4.70517	7.57674	0.662097	6.19758e-08
ZNF592	zinc finger protein 592	7.14041	8.12915	0.874699	0.362399		5.25383	8.3932	0.661456	1.94589e-10
MOSPD3	motile sperm domain containing 3	2.0817	2.42907	0.870575	0.501407		1.74028	3.02296	0.660991	0.000724987
OXER1	oxoeicosanoid receptor 1	3.33888	3.74788	0.906744	0.683732		3.28673	5.53487	0.660896	0.000192215
HNF1B	HNF1 homeobox B	5.34896	5.55607	0.917901	0.759834		3.17448	5.27678	0.660804	7.96573e-05
CTSW	cathepsin W	5.75432	6.08121	0.940851	0.855293		4.01808	6.73592	0.660509	5.04157e-05
OAF	out at first homolog	34.1468	45.9665	0.749283	0.01299		32.5598	53.1489	0.660393	3.56511e-06
LOC100129617	#N/A	1.41082	1.41515	0.995105	0.991648		0.864141	1.50491	0.660262	0.00339409
TMEM104	transmembrane protein 104	1.88408	2.08697	0.895207	0.590026		1.31459	2.1397	0.659914	3.67478e-06
CEL	carboxyl ester lipase	1.5887	4.73722	0.703615	0.035693		1.02126	2.00944	0.659344	0.00485125
CNOT4	CCR4-NOT transcription complex subunit 4	4.87376	6.25764	0.793253	0.0785473		3.55524	5.70151	0.658686	4.60775e-07
ABO	ABO blood group (transferase A, alpha 1-3-N-acetylgalactosaminyltransferase; transferase B, alpha 1-3-galactosyltransferase)	4.93775	5.76549	0.934639	0.844847		3.32336	5.39687	0.65851	6.0888e-05
KLF5	Kruppel like factor 5	92.9835	115.922	0.79786	0.0685577		76.7909	121.935	0.658168	1.87301e-11
MECP2	methyl-CpG binding protein 2	4.50437	5.62491	0.80338	0.0126461		3.67175	5.8352	0.658085	7.99608e-09
SUSD2	sushi domain containing 2	6.27556	9.45064	0.873476	0.591382		8.87389	16.1931	0.657732	0.00156855
NRTN	neurturin	2.06321	2.23666	0.942837	0.870693		1.4806	2.73236	0.65771	0.00645089
DOCK6	dedicator of cytokinesis 6	6.42234	7.2879	0.88631	0.448673		5.08497	8.2609	0.657485	8.75081e-07
MBD5	methyl-CpG binding domain protein 5	3.09907	4.0707	0.77426	0.0108252		2.44363	3.91757	0.65728	2.03885e-09
PACS1	phosphofurin acidic cluster sorting protein 1	4.84855	5.85677	0.84315	0.318645		3.92464	6.27911	0.657219	9.12515e-07
COLCA1	colorectal cancer associated 1	3.21609	2.96048	0.975255	0.950683		1.11142	1.98616	0.657177	0.00126816
ATP13A4	ATPase 13A4	1.86651	0.476489	1.24218	0.172773		0.15242	0.489062	0.65706	0.0135462
MMP2	matrix metallopeptidase 2	16.383	20.4836	0.823448	0.205763		13.3845	21.691	0.657016	0.00023273
FBXL7	F-box and leucine rich repeat protein 7	0.932113	1.16939	0.844582	0.40544		0.693124	1.24542	0.656936	0.00583218
SLC35A4	solute carrier family 35 member A4	13.293	17.246	0.776502	0.026464		10.2467	16.4872	0.65661	6.64315e-09
MARK2	microtubule affinity regulating kinase 2	12.0913	13.1985	0.889745	0.593895		8.79282	14.019	0.656315	4.87567e-11
PTPN23	protein tyrosine phosphatase, non-receptor type 23	4.7897	5.22021	0.920487	0.757542		3.40897	5.56786	0.656191	1.57803e-05
CLIP3	CAP-Gly domain containing linker protein 3	0.684846	1.04924	0.730767	0.0421019		0.508878	0.900887	0.656107	0.00360535
IQSEC2	IQ motif and Sec7 domain 2	2.15059	2.34192	0.92172	0.716851		1.73577	2.87069	0.656011	6.59456e-06
GAL3ST4	galactose-3-O-sulfotransferase 4	1.76438	1.58087	1.06997	0.821522		1.16202	1.98249	0.655773	0.000554151
BRD4	bromodomain containing 4	5.0543	5.3608	0.928712	0.767194		3.51056	5.67829	0.65523	1.41059e-06
RAVER1	ribonucleoprotein, PTB binding 1	7.02502	8.01443	0.884358	0.550821		5.76155	9.42521	0.653432	7.4708e-08
MUC17	mucin 17, cell surface associated	40.8691	63.5146	0.759365	0.16319		37.5778	65.3868	0.653409	0.00100128
ZNF652	zinc finger protein 652	11.1562	14.3253	0.780508	0.00512231		8.13395	13.1009	0.653306	3.56995e-09
SSTR5-AS1	SSTR5 antisense RNA 1	0.667194	0.73067	0.929468	0.831031		0.457225	0.890008	0.653288	0.00555795
DNAH1	dynein axonemal heavy chain 1	3.80292	4.07127	0.948573	0.844847		3.00794	4.96382	0.653242	5.51132e-06
SERINC2	serine incorporator 2	23.6446	29.5607	0.797489	0.0595475		21.86	36.4631	0.652654	5.35637e-07
ACRBP	acrosin binding protein	2.22751	3.62509	0.702687	0.0235556		2.50897	4.21828	0.65218	0.000299683
SETBP1	SET binding protein 1	2.64104	2.70928	0.967284	0.92313		1.48075	2.57649	0.652106	9.74707e-05
KSR2	kinase suppressor of ras 2	0.216571	0.127534	1.10299	0.745467		0.0352627	0.0815681	0.651865	0.0116224
CYP2S1	cytochrome P450 family 2 subfamily S member 1	27.6801	42.3582	0.736515	0.0746623		30.798	51.3028	0.651662	4.21101e-05
LOC92249	#N/A	1.03437	1.10815	0.938497	0.843355		0.619606	1.12503	0.65159	0.00304202
CNTFR	ciliary neurotrophic factor receptor	0.949958	0.833147	1.04769	0.905103		0.552059	1.07255	0.651459	0.00492261
LOC202181	#N/A	2.10845	2.57179	0.875365	0.601533		1.66767	2.81417	0.651361	4.54363e-05
PLAGL2	PLAG1 like zinc finger 2	3.65554	4.8126	0.821293	0.346174		2.93297	4.86796	0.651217	0.00012205
IL32	interleukin 32	55.218	95.5406	0.662009	0.00194156		62.6929	105.33	0.650764	3.31333e-06
ABHD4	abhydrolase domain containing 4	7.45519	11.4527	0.683756	4.54855e-05		7.23135	11.7976	0.650733	1.31643e-07
EPN3	epsin 3	3.08347	2.97328	0.972535	0.943111		1.69531	2.90262	0.649977	5.77115e-05
ISG20L2	interferon stimulated exonuclease gene 20 like 2	8.55621	11.7012	0.748456	0.00484925		7.34764	11.9543	0.649538	6.14593e-09
AHDC1	AT-hook DNA binding motif containing 1	1.05986	1.00999	1.02875	0.939407		0.69049	1.14966	0.649061	2.89424e-05
NUP214	nucleoporin 214	7.13208	8.00448	0.896011	0.601544		4.73521	7.69475	0.648346	1.83797e-09
OXA1L	OXA1L, mitochondrial inner membrane protein	48.6875	77.3884	0.655466	8.23233e-07		48.5424	80.231	0.648103	2.6435e-07
SEZ6L2	seizure related 6 homolog like 2	5.6711	6.82268	0.862636	0.506126		3.62751	6.55041	0.647661	0.000475443
PPP1R13L	protein phosphatase 1 regulatory subunit 13 like	1.7874	1.85005	0.959148	0.896611		1.27388	2.19781	0.647424	0.000281268
SIPA1L3	signal induced proliferation associated 1 like 3	17.6457	18.8412	0.918229	0.735225		14.3488	23.6556	0.647284	7.73264e-08
PIK3R2	phosphoinositide-3-kinase regulatory subunit 2	13.2474	15.8678	0.843714	0.0936933		10.6718	17.6295	0.647281	1.12076e-07
SLC41A1	solute carrier family 41 member 1	1.58714	2.09489	0.790203	0.151423		1.00346	1.73779	0.647042	0.000264067
SLC29A3	solute carrier family 29 member 3	1.68908	2.35904	0.782567	0.15803		1.35637	2.36901	0.646118	0.000173546
MPV17L	MPV17 mitochondrial inner membrane protein like	5.03376	8.32309	0.728244	0.0727632		4.48356	7.40316	0.645896	3.67586e-08
DAG1	dystroglycan 1	11.5676	14.6704	0.806017	0.130326		8.64965	14.1855	0.645576	6.24991e-10
APOOL	apolipoprotein O like	3.74632	5.4838	0.692492	0.000260759		2.85241	4.856	0.645122	1.82941e-05
EFCAB14	EF-hand calcium binding domain 14	34.6578	46.4375	0.754647	0.00514155		26.1999	43.015	0.644245	3.02386e-10
GKN2	gastrokine 2	0.363335	9.98087	0.791563	0.0407538		0.319363	1.63366	0.644163	0.00529417
FKBP1AP1	#N/A	1.86292	2.7333	0.804662	0.317597		1.56491	2.6844	0.644013	0.000671076
FOXJ2	forkhead box J2	3.71572	4.49599	0.840181	0.289306		2.62777	4.34057	0.643613	2.12704e-06
COL1A1	collagen type I alpha 1	10.9	10.4532	1.02351	0.952002		7.07495	12.5904	0.642954	0.000365975
ELK4	ELK4, ETS transcription factor	6.66937	9.63071	0.709527	6.68186e-05		5.04169	8.35127	0.642694	1.90948e-06
TTBK1	tau tubulin kinase 1	0.53477	0.710851	0.770124	0.109484		0.538228	0.984843	0.642485	0.000131831
MNT	MAX network transcriptional repressor	2.40787	2.73716	0.892944	0.638078		1.82561	3.11693	0.641743	3.43529e-05
CD74	CD74 molecule	778.298	1107.18	0.78239	0.224661		815.678	1366.5	0.641601	2.68349e-08
SETD5	SET domain containing 5	14.1333	16.6717	0.851557	0.247426		9.69138	15.857	0.641583	4.19117e-10
MPEG1	macrophage expressed 1	20.1296	26.009	0.794756	0.0390555		16.1451	26.4391	0.64158	6.12497e-10
C17orf103	#N/A	2.04052	2.59346	0.819549	0.253428		1.85504	3.12174	0.641388	2.33426e-07
TAF1C	TATA-box binding protein associated factor, RNA polymerase I subunit C	4.96654	6.05941	0.849717	0.405298		4.98486	8.45437	0.640938	5.63157e-08
SEMA4A	semaphorin 4A	2.13705	2.2831	0.928846	0.797874		1.41018	2.55324	0.640563	0.000439121
BCOR	BCL6 corepressor	8.03806	9.27791	0.860974	0.130326		5.5447	9.10412	0.640225	1.86909e-09
IGF1	insulin like growth factor 1	2.71235	3.79321	0.750818	0.0477224		2.1946	3.71639	0.639708	9.01888e-07
ZNF385A	zinc finger protein 385A	0.794531	0.939197	0.87784	0.608407		0.593055	1.1089	0.639644	0.00251447
MSI1	musashi RNA binding protein 1	1.80913	3.02332	0.679475	0.00615969		1.17428	2.28048	0.639618	0.00125492
GNAO1	G protein subunit alpha o1	0.627859	0.814083	0.787241	0.129507		0.455149	0.826916	0.639397	0.000699478
FXYD6	FXYD domain containing ion transport regulator 6	2.98456	3.6853	0.815849	0.297336		2.50283	4.28862	0.639356	0.000126656
FOXRED2	FAD dependent oxidoreductase domain containing 2	1.82095	2.30407	0.824738	0.314443		1.42923	2.45521	0.639252	3.12919e-06
GSN-AS1	GSN antisense RNA 1	1.78933	1.56164	1.03643	0.926659		1.13669	1.98721	0.638784	6.30364e-06
HNF1A-AS1	HNF1A antisense RNA 1	5.98864	5.90934	0.993157	0.987974		3.26568	5.88525	0.638771	7.25046e-05
TMEM198B	transmembrane protein 198B (pseudogene)	3.33043	4.04858	0.847755	0.297336		2.63214	4.54004	0.638573	1.3064e-05
MADCAM1	mucosal vascular addressin cell adhesion molecule 1	0.514131	1.27277	0.641202	0.999959		0.373314	0.848336	0.638486	0.00720935
SYT7	synaptotagmin 7	1.3684	1.15245	1.00011	0.999904		0.62585	1.08247	0.638122	3.21926e-05
IKZF4	IKAROS family zinc finger 4	0.409276	0.488683	0.89623	0.695663		0.246343	0.491431	0.637723	0.00345685
NECTIN1	Nectin cell adhesion molecule 1	6.59947	8.54461	0.800536	0.102835		5.06108	8.4753	0.637298	5.86701e-11
LGALS9	galectin 9	14.2257	17.6899	0.771495	0.0505656		10.847	18.5098	0.63692	7.98459e-06
ZYX	zyxin	13.0811	19.4046	0.70512	0.000455202		10.9418	18.3119	0.636807	1.91264e-07
CX3CL1	C-X3-C motif chemokine ligand 1	1.11907	1.58334	0.743833	0.0448046		1.07115	1.91295	0.63679	0.000804534
RAB3A	RAB3A, member RAS oncogene family	0.719062	1.07195	0.763671	0.999959		0.517244	1.09042	0.636337	0.00448807
SERPINA1	serpin family A member 1	106.49	172.501	0.694383	0.0103374		119.896	203.071	0.635818	1.54492e-07
GGT5	gamma-glutamyltransferase 5	5.44942	5.21008	0.973696	0.938509		5.0929	8.68926	0.635705	6.14448e-05
SOX9	SRY-box 9	11.8594	13.2248	0.906286	0.71473		5.43731	9.74109	0.635215	0.000195339
GPSM3	G-protein signaling modulator 3	5.35859	7.85971	0.720198	0.0139886		5.44495	9.32252	0.635152	5.10173e-06
SYNGAP1	synaptic Ras GTPase activating protein 1	1.03097	1.16937	0.91588	0.747593		0.770452	1.33209	0.633816	5.77182e-05
TCF7	transcription factor 7 (T-cell specific, HMG-box)	4.21279	6.41668	0.692702	0.00146668		3.46373	5.91315	0.633753	1.04169e-09
NCOA6	nuclear receptor coactivator 6	8.31159	8.61362	0.948847	0.871231		5.27135	8.78108	0.632864	2.54039e-09
PLVAP	plasmalemma vesicle associated protein	20.4598	20.9342	0.965238	0.910492		18.3928	31.5605	0.63277	8.70332e-06
CREB3L1	cAMP responsive element binding protein 3 like 1	11.6315	9.45187	1.03114	0.938748		4.77908	8.42715	0.632656	3.70697e-05
CD68	CD68 molecule	107.249	166.22	0.761358	0.166603		116.907	201.486	0.632652	1.57996e-07
RUNX2	runt related transcription factor 2	2.28051	2.79012	0.828852	0.239941		1.40121	2.50266	0.632364	0.000139183
NAT6	N-acetyltransferase 6	1.99637	2.87418	0.741668	0.0383232		1.74992	3.23191	0.63198	0.000816663
TBX10	T-box 10	3.90619	4.98511	0.786809	0.226054		4.09394	7.91863	0.630642	0.000512008
CCDC120	coiled-coil domain containing 120	2.36798	3.46421	0.716601	0.00437327		2.82171	4.90725	0.630006	6.46436e-06
TPP1	tripeptidyl peptidase 1	13.5034	17.0434	0.820762	0.286726		10.5385	18.4919	0.629694	7.3585e-05
CLDN18	claudin 18	1.75539	2.47378	0.864819	0.583709		0.592019	1.47959	0.628105	0.00446839
KMT2A	lysine methyltransferase 2A	9.91423	11.5195	0.877288	0.49561		6.55616	10.862	0.627804	1.69635e-10
TNFSF12	tumor necrosis factor superfamily member 12	2.85666	4.30744	0.695187	0.0021172		2.82085	4.88761	0.62755	7.75664e-06
KIAA1522	KIAA1522	20.1258	22.5853	0.865752	0.503589		15.2071	25.8993	0.627206	1.33022e-07
MMP19	matrix metallopeptidase 19	1.89865	2.55722	0.775369	0.0451865		1.57523	2.76143	0.626319	2.25704e-06
PRRC2A	proline rich coiled-coil 2A	15.0945	18.1661	0.849182	0.316906		11.2266	19.4436	0.625581	1.39624e-08
R3HDM2	R3H domain containing 2	9.99544	12.0387	0.854945	0.329414		7.42491	12.5952	0.625154	9.73712e-10
NR1D1	nuclear receptor subfamily 1 group D member 1	4.64828	5.54402	0.866741	0.488544		4.17136	7.74436	0.625103	0.000214431
LOC100506472	#N/A	0.480729	0.607566	0.874449	0.620228		0.316793	0.620785	0.624798	0.00117052
BAHCC1	BAH domain and coiled-coil containing 1	1.7468	1.93182	0.917877	0.71187		1.48113	2.60938	0.624519	2.78155e-06
BRPF3	bromodomain and PHD finger containing 3	8.3003	8.8234	0.913797	0.726206		5.62725	9.60806	0.624243	1.84152e-09
SYVN1	synoviolin 1	10.9926	13.29	0.843773	0.29193		7.86162	14.1042	0.623065	1.97436e-06
F5	coagulation factor V	0.939637	0.795408	1.08694	0.781327		0.3791	0.714325	0.623051	9.35761e-05
SLCO2A1	solute carrier organic anion transporter family member 2A1	4.6662	5.16058	0.908719	0.750694		3.00737	5.31526	0.622968	3.40556e-07
DYNLRB1	dynein light chain roadblock-type 1	31.8747	49.7746	0.702003	0.00454851		30.6433	53.8383	0.622571	1.18354e-07
HEYL	hes related family bHLH transcription factor with YRPW motif-like	0.617213	0.78119	0.854165	0.499845		0.50755	0.982375	0.622355	0.000741287
CIC	capicua transcriptional repressor	4.71991	5.2465	0.914838	0.651128		3.67863	6.3936	0.621887	1.08253e-07
UBLCP1	ubiquitin like domain containing CTD phosphatase 1	6.50689	10.7777	0.634883	4.85304e-07		5.26961	9.26803	0.621365	1.51196e-07
PCDHGB7	protocadherin gamma subfamily B, 7	2.0444	2.82485	0.77273	0.100691		1.41323	2.62459	0.620154	0.000126428
LINC00294	long intergenic non-protein coding RNA 294	3.97505	5.25033	0.801262	0.251756		3.39902	5.82925	0.62007	3.70759e-09
PURA	purine rich element binding protein A	12.1572	18.3912	0.693048	0.000723973		9.90877	17.0357	0.619377	6.87486e-10
MYRF	myelin regulatory factor	6.32253	8.979	0.729379	0.0065939		4.923	8.43766	0.619358	1.61168e-11
TMEM189-UBE2V1	TMEM189-UBE2V1 readthrough	14.5122	22.7974	0.659348	9.76834e-07		12.6728	21.5761	0.619045	2.5629e-15
P2RY13	purinergic receptor P2Y13	2.87883	3.84633	0.774483	0.0785473		2.49328	4.39733	0.618845	3.56511e-06
PHACTR4	phosphatase and actin regulator 4	6.35186	7.89157	0.815489	0.184848		4.50017	7.66716	0.61775	9.01458e-16
FOXQ1	forkhead box Q1	7.48165	11.46	0.917426	0.713023		4.3912	8.06186	0.61754	5.97883e-05
TOX3	TOX high mobility group box family member 3	6.83712	7.24388	0.92174	0.762671		4.22498	7.37387	0.616816	3.46385e-10
SLC16A2	solute carrier family 16 member 2	2.47412	3.00201	0.888335	0.680195		1.28886	2.43207	0.61675	2.09074e-05
UBALD1	UBA like domain containing 1	3.55126	4.33335	0.828674	0.23053		3.02455	5.55162	0.616474	4.29451e-05
PPP1R11	protein phosphatase 1 regulatory inhibitor subunit 11	32.1996	52.5309	0.646609	9.76834e-07		30.2409	52.0464	0.616018	2.19122e-13
AAK1	AP2 associated kinase 1	4.05762	4.57008	0.884114	0.625202		2.70425	4.65818	0.615213	2.64868e-08
SCN3B	sodium voltage-gated channel beta subunit 3	1.17868	0.920871	1.14713	0.616005		0.834949	1.83191	0.61515	0.000701935
IL2RG	interleukin 2 receptor subunit gamma	25.2626	35.8751	0.751918	0.0670153		23.7551	41.2897	0.615114	2.05249e-11
GATAD2B	GATA zinc finger domain containing 2B	4.39046	4.99814	0.900047	0.653091		2.75206	4.72561	0.615087	8.89314e-10
ELMSAN1	ELM2 and Myb/SANT domain containing 1	8.31727	9.32158	0.877356	0.524114		6.37035	11.1902	0.615086	3.67586e-08
C19orf55	#N/A	1.15059	1.31414	0.901797	0.71097		0.786313	1.49656	0.615067	0.00020604
KCNE2	potassium voltage-gated channel subfamily E regulatory subunit 2	8.11921	4.15567	1.06018	0.761706		1.42221	3.40262	0.614867	0.00199273
IQSEC1	IQ motif and Sec7 domain 1	4.30068	4.83289	0.908801	0.663449		2.74654	4.96548	0.61445	4.73859e-06
GPX3	glutathione peroxidase 3	16.7417	27.0689	0.646909	5.55347e-07		16.0399	28.1323	0.614053	1.08113e-07
SEPN1	selenoprotein N, 1	7.2084	9.32565	0.803969	0.116223		5.3577	9.41268	0.612816	2.10299e-10
PGC	progastricsin	708.859	483.69	1.01862	0.92208		13.9781	214.102	0.612795	0.000245677
NAF1	nuclear assembly factor 1 ribonucleoprotein	2.22742	2.98534	0.795151	0.244183		1.33584	2.54332	0.612348	0.000132734
NACC1	nucleus accumbens associated 1	6.99994	9.29865	0.771717	0.0405206		5.80601	10.2621	0.611817	1.86594e-08
C6orf132	chromosome 6 open reading frame 132	5.2537	7.8465	0.709455	0.00284401		4.68882	8.60402	0.611725	6.61217e-07
PCDHGC3	protocadherin gamma subfamily C, 3	2.76944	3.97754	0.754262	0.0666613		1.92811	3.55173	0.611097	4.23372e-05
MUC4	mucin 4, cell surface associated	2.33982	0.264408	1.2956	0.10551		0.146615	0.272766	0.610833	0.000216652
HABP2	hyaluronan binding protein 2	2.96778	1.88707	1.0669	0.807546		0.48937	1.38573	0.609684	0.00238809
DUSP7	dual specificity phosphatase 7	1.91645	2.37595	0.823988	0.22303		1.42363	2.55099	0.609165	7.11487e-07
LOC284454	#N/A	2.20348	1.94722	1.07352	0.831636		1.63637	3.93982	0.608688	0.000804534
IGLL5	immunoglobulin lambda like polypeptide 5	824.709	1070.61	0.81637	0.350125		560.318	1055.17	0.608226	7.95958e-06
VAC14	Vac14, PIKFYVE complex component	7.33393	10.0321	0.738793	0.000131231		6.03051	10.8957	0.608046	4.71231e-09
TNF	tumor necrosis factor	1.17525	1.65644	0.775212	0.165832		1.00512	1.9944	0.607354	0.000498013
KIAA2018	#N/A	7.7351	10.0205	0.797486	0.183249		5.18381	9.27946	0.606474	2.649e-07
ENG	endoglin	7.27084	8.56721	0.869185	0.454654		5.97427	11.1862	0.606326	1.26567e-05
VWA5B2	von Willebrand factor A domain containing 5B2	1.42976	1.52006	0.919154	0.780157		0.877072	1.78567	0.605738	9.44848e-05
MN1	meningioma (disrupted in balanced translocation) 1	0.376177	0.529074	0.794865	0.274416		0.294555	0.594068	0.605706	0.000455213
PPP1R10	protein phosphatase 1 regulatory subunit 10	16.1195	21.5089	0.759532	0.00372196		12.9781	22.9086	0.605649	1.5059e-10
NCSTN	nicastrin	35.5018	51.4857	0.708746	0.000232674		31.9493	56.9509	0.605575	4.93075e-10
LATS1	large tumor suppressor kinase 1	7.90117	10.906	0.742716	0.00927764		5.70366	9.96887	0.605548	2.09021e-11
C17orf97	chromosome 17 open reading frame 97	1.20606	1.92338	0.722347	0.0421019		0.862483	1.67117	0.603875	0.000245677
CC2D1A	coiled-coil and C2 domain containing 1A	18.55	23.4492	0.797966	0.00819771		16.2992	28.8182	0.60377	3.83908e-13
TCF7L2	transcription factor 7 like 2	10.2222	10.4588	0.926576	0.76111		6.06251	10.9953	0.603356	6.14189e-07
MAPK1IP1L	mitogen-activated protein kinase 1 interacting protein 1-like	11.8621	17.8428	0.691238	0.000354685		9.44217	16.6523	0.603351	1.53297e-12
PCLO	piccolo presynaptic cytomatrix protein	1.59774	1.81478	0.894065	0.671881		0.975857	1.72957	0.602763	1.2936e-11
ATXN2L	ataxin 2 like	10.2992	13.3244	0.812264	0.202751		8.10994	14.2415	0.60249	3.22076e-10
MOB3A	MOB kinase activator 3A	5.28449	7.03708	0.775065	0.0346029		4.02678	7.11739	0.60224	6.32786e-12
FEV	FEV, ETS transcription factor	1.67131	2.14602	0.846116	0.501207		1.11384	2.25545	0.602138	8.15026e-05
SLC7A8	solute carrier family 7 member 8	9.50519	12.4978	0.802651	0.249372		7.6839	13.7724	0.601826	1.39624e-08
PATL1	PAT1 homolog 1, processing body mRNA decay factor	8.09106	11.493	0.728165	0.00778321		6.25621	10.95	0.601222	1.18579e-16
MFAP4	microfibrillar associated protein 4	19.7981	28.5919	0.720704	0.00491801		17.7694	32.3825	0.601194	6.84277e-07
CNNM1	cyclin and CBS domain divalent metal cation transport mediator 1	0.336655	0.472847	0.769848	0.129507		0.244887	0.503328	0.599419	0.000373398
C7orf31	chromosome 7 open reading frame 31	1.98151	2.34393	0.856249	0.525283		1.15342	2.11103	0.597179	1.04096e-07
GPR112	#N/A	2.69551	3.65324	0.933071	0.788567		2.16317	3.96277	0.596996	1.14881e-06
PSCA	prostate stem cell antigen	0.898654	1.21473	0.865172	0.999959		0.380202	1.32129	0.59663	0.00138295
CBLL1	Cbl proto-oncogene like 1	6.69908	10.5908	0.651043	9.76834e-07		5.45599	9.81922	0.595879	2.74332e-10
TFF2	trefoil factor 2	517.755	454.333	1.00317	0.987372		14.5933	278.852	0.59553	9.60636e-05
MIXL1	Mix paired-like homeobox	0.50601	0.750131	0.781713	0.999959		0.350741	0.81747	0.595295	0.000699478
CNKSR1	connector enhancer of kinase suppressor of Ras 1	5.61381	7.35088	0.780358	0.0685577		4.78763	8.63425	0.594957	8.47692e-12
CEACAM5	carcinoembryonic antigen related cell adhesion molecule 5	111.722	33.3084	1.13486	0.604961		12.1161	23.0735	0.5945	6.80346e-06
NAV1	neuron navigator 1	2.47783	2.99512	0.858862	0.423164		1.56229	2.8322	0.594424	3.61193e-09
ANPEP	alanyl aminopeptidase, membrane	1141.23	1708.53	0.791468	0.279341		1064.03	1969.29	0.59331	5.17817e-09
RNF44	ring finger protein 44	4.73894	5.62495	0.852455	0.354266		3.37338	6.22983	0.592775	1.66297e-08
FAM107A	family with sequence similarity 107 member A	1.1986	1.96182	0.685716	0.0050665		1.12738	2.14961	0.592209	3.30542e-06
SRRM1	serine and arginine repetitive matrix 1	10.6008	14.9159	0.74346	0.0105883		7.59779	13.6577	0.591225	7.97849e-11
SDK2	sidekick cell adhesion molecule 2	0.300055	0.256874	1.07957	0.816612		0.124276	0.274492	0.59062	0.000202259
SF3A2	splicing factor 3a subunit 2	9.37074	11.3429	0.838218	0.175395		7.25156	13.5252	0.590571	4.58409e-09
PCDHGB6	protocadherin gamma subfamily B, 6	1.82789	2.83247	0.706588	0.00797692		1.31797	2.63865	0.590271	2.83363e-05
CCL14	C-C motif chemokine ligand 14	13.8321	20.6293	0.730965	0.0304545		11.8426	22.814	0.589945	8.97409e-07
HOXA4	homeobox A4	0.865724	1.18878	0.820194	0.396556		0.444058	1.08496	0.589481	0.000694303
HCFC1	host cell factor C1	8.01423	8.811	0.9169	0.702307		5.47317	10.0886	0.589339	1.97328e-10
FXYD5	FXYD domain containing ion transport regulator 5	6.37884	9.57205	0.725717	0.0224283		4.86397	9.06653	0.588183	4.3965e-07
RFX7	regulatory factor X7	5.67828	7.89048	0.739256	0.00553259		3.65567	6.63249	0.587767	4.90654e-10
PCDHGA10	protocadherin gamma subfamily A, 10	2.2323	3.21963	0.750445	0.0482574		1.50272	2.92568	0.587412	2.83525e-06
RAC2	ras-related C3 botulinum toxin substrate 2 (rho family, small GTP binding protein Rac2)	11.3215	15.826	0.745177	0.0172719		10.2623	19.0677	0.587287	1.3946e-08
PRH1-PRR4	0	6.47123	6.92088	0.94101	0.865094		2.97469	6.02665	0.586923	5.21175e-06
EHD2	EH domain containing 2	2.85475	3.05572	0.950956	0.870122		1.93047	3.61171	0.586334	5.20029e-07
PCDHGB2	protocadherin gamma subfamily B, 2	1.73824	2.80691	0.689204	0.00426985		1.26506	2.59228	0.585819	3.89156e-05
POGZ	pogo transposable element with ZNF domain	8.91708	11.6514	0.788388	0.0801712		5.87566	10.6824	0.584778	2.07363e-12
PCDHGB4	protocadherin gamma subfamily B, 4	1.69479	2.70505	0.689912	0.00393444		1.24388	2.53818	0.584401	2.35605e-05
GP2	glycoprotein 2	36.5698	27.7105	1.02975	0.920401		4.36875	22.8236	0.584384	0.000608817
MYL9	myosin light chain 9	24.5284	45.7228	0.610086	8.57768e-05		24.621	48.3294	0.583153	6.60942e-06
HAPLN4	hyaluronan and proteoglycan link protein 4	3.79819	6.15047	0.847551	0.477748		4.29054	8.48366	0.583069	2.69866e-06
ATN1	atrophin 1	5.27335	6.09998	0.89094	0.618736		3.39592	6.47121	0.582045	4.3965e-07
SOD3	superoxide dismutase 3, extracellular	5.68459	3.38523	1.11689	0.658254		1.85328	4.60771	0.582014	0.000254105
FBRS	fibrosin	8.26063	9.98905	0.854732	0.402375		6.38995	11.9282	0.582009	6.55186e-10
EVI2B	ecotropic viral integration site 2B	9.79632	14.0466	0.742315	0.0467486		6.62613	12.9136	0.581362	3.17919e-07
PCDHGB3	protocadherin gamma subfamily B, 3	1.72399	2.68723	0.702261	0.0065939		1.22448	2.49571	0.580177	1.2079e-05
PCDHGA11	protocadherin gamma subfamily A, 11	1.71344	2.49471	0.739931	0.0284695		1.1329	2.28914	0.579331	8.00243e-06
SRPRA	SRP receptor alpha subunit	29.6739	45.9416	0.650277	1.66547e-14		24.7804	45.5451	0.578108	4.69226e-18
CTDNEP1	CTD nuclear envelope phosphatase 1	11.3635	15.8783	0.754648	0.0451865		8.3264	15.357	0.577744	1.37258e-11
SETD1B	SET domain containing 1B	3.29547	3.85156	0.88044	0.548767		2.27478	4.25426	0.575291	2.83555e-09
FOXP4	forkhead box P4	3.12564	3.60472	0.884251	0.583147		2.11067	4.00692	0.575279	2.03885e-09
PCDHGB5	protocadherin gamma subfamily B, 5	1.89081	2.77046	0.73491	0.0244149		1.29198	2.6381	0.575174	4.03982e-06
ZFP36	ZFP36 ring finger protein	27.1592	35.4855	0.794127	0.140001		25.0086	49.2888	0.57497	1.66297e-08
PCDHGA7	protocadherin gamma subfamily A, 7	1.51319	2.42835	0.682505	0.00200921		1.06497	2.2468	0.573485	2.06764e-05
PCDHGA9	protocadherin gamma subfamily A, 9	1.83162	2.76872	0.720808	0.0179968		1.25983	2.62603	0.572329	7.98459e-06
UBE2V1	ubiquitin conjugating enzyme E2 V1	8.54098	14.0557	0.63022	1.73512e-08		7.02516	13.1228	0.56993	1.32054e-17
TCN1	transcobalamin 1	12.1911	16.5045	0.972781	0.895099		0.583831	5.2167	0.569514	8.88724e-05
CECR1	cat eye syndrome chromosome region, candidate 1	5.91518	8.2866	0.723826	0.000587245		4.63245	8.81881	0.569468	1.61168e-11
ECM1	extracellular matrix protein 1	3.32517	6.54431	0.664211	0.00495526		2.94261	5.94263	0.56927	7.15224e-07
PCDHGA8	protocadherin gamma subfamily A, 8	1.3271	2.12515	0.69365	0.00604004		0.954736	2.02751	0.567891	1.00587e-05
ATF7	activating transcription factor 7	3.59486	4.12309	0.885148	0.618505		2.03538	3.84845	0.56697	6.06477e-11
MEF2D	myocyte enhancer factor 2D	6.21461	7.12956	0.871408	0.491783		4.04597	7.69019	0.565901	2.10299e-10
TP53I11	tumor protein p53 inducible protein 11	4.85635	6.167	0.807741	0.298284		2.80479	5.41986	0.565696	6.27901e-09
RPRD2	regulation of nuclear pre-mRNA domain containing 2	6.76008	9.01428	0.775447	0.0584639		4.67428	8.72069	0.565537	1.18579e-16
PCDHGB1	protocadherin gamma subfamily B, 1	1.59141	2.56049	0.687361	0.00423192		1.12377	2.4134	0.563585	7.54616e-06
PHF12	PHD finger protein 12	5.5381	7.31373	0.774274	0.0167382		3.96677	7.53604	0.563063	8.02155e-15
ZFP36L1	ZFP36 ring finger protein-like 1	25.6744	34.8291	0.813451	0.271606		17.5349	34.3188	0.562668	1.15405e-12
ARID1A	AT-rich interaction domain 1A	11.3266	13.211	0.87731	0.562719		7.26413	13.8048	0.562262	1.63807e-13
PCDHGA6	protocadherin gamma subfamily A, 6	1.63363	2.69087	0.67415	0.0018494		1.22055	2.55055	0.562154	1.80704e-06
CAMTA2	calmodulin binding transcription activator 2	5.57049	6.86047	0.828077	0.225552		4.0564	7.80163	0.560551	3.43365e-13
PCDHGA2	protocadherin gamma subfamily A, 2	1.4872	2.42253	0.677312	0.00200921		1.04591	2.28352	0.560206	7.54616e-06
PCDHGA12	protocadherin gamma subfamily A, 12	1.65287	2.62795	0.691339	0.00417052		1.16235	2.49577	0.559322	3.16554e-06
APOD	apolipoprotein D	3.15304	5.58978	0.615641	5.23004e-06		2.48199	5.59393	0.557984	1.73665e-05
PCDHGC5	protocadherin gamma subfamily C, 5	1.50421	2.45797	0.676445	0.0018494		1.04783	2.28386	0.55671	4.20007e-06
GSK3A	glycogen synthase kinase 3 alpha	10.6153	18.6252	0.588444	1.66547e-14		10.7501	21.2875	0.556404	8.59456e-12
SPATA2	spermatogenesis associated 2	3.79896	5.4409	0.713101	0.00237339		3.06178	5.95761	0.556319	3.53692e-15
CRTC2	CREB regulated transcription coactivator 2	3.44306	4.98025	0.71554	0.00116646		2.95038	5.87082	0.555837	1.04169e-09
SYT2	synaptotagmin 2	0.756814	0.696463	1.03143	0.939407		0.375631	0.780602	0.554839	6.61272e-08
NPAS2	neuronal PAS domain protein 2	5.85764	7.37523	0.799545	0.17095		4.08193	8.4339	0.554571	9.73712e-10
KIAA1683	KIAA1683	0.813524	0.727087	0.997836	0.994675		0.436165	1.03474	0.554258	2.75331e-05
MUC1	mucin 1, cell surface associated	8.85767	3.79015	1.1637	0.45586		0.978651	3.15859	0.553701	0.000135256
WAS	Wiskott-Aldrich syndrome	2.76001	4.29047	0.696516	0.00444897		2.3671	4.94084	0.551865	2.6435e-07
PCDHGA1	protocadherin gamma subfamily A, 1	1.49342	2.48907	0.667626	0.00132237		1.05691	2.34343	0.551443	3.30542e-06
SERPINA5	serpin family A member 5	2.66201	1.95687	1.02275	0.930143		0.1832	0.888645	0.55098	0.000126428
PCDHGC4	protocadherin gamma subfamily C, 4	1.51939	2.49124	0.674519	0.00165264		1.06475	2.36825	0.550907	3.30542e-06
SLAMF8	SLAM family member 8	2.05442	2.99495	0.744328	0.0421019		1.55867	3.10308	0.550743	8.4074e-09
BCL9	B-cell CLL/lymphoma 9	2.42585	3.32247	0.765668	0.0738168		1.42939	2.85051	0.550693	9.95209e-14
PCDHGA4	protocadherin gamma subfamily A, 4	1.53228	2.47466	0.686557	0.00393444		1.07428	2.35754	0.550219	1.61647e-06
EP300	E1A binding protein p300	15.8753	19.2726	0.841328	0.369554		10.6173	20.5223	0.549585	2.19122e-13
CDR1	cerebellar degeneration related protein 1	2.60556	1.86223	1.03846	0.891554		0.603909	2.60568	0.549494	0.000121805
FBXL16	F-box and leucine rich repeat protein 16	0.407517	0.638412	0.743256	0.0993919		0.285225	0.673477	0.549064	9.15266e-06
BCL3	B-cell CLL/lymphoma 3	5.94842	7.98787	0.77519	0.0804063		4.86586	10.4308	0.548989	1.35501e-07
PCDHGA5	protocadherin gamma subfamily A, 5	1.59512	2.64265	0.670185	0.00142717		1.1165	2.46707	0.547263	1.30063e-06
PCDHGA3	protocadherin gamma subfamily A, 3	1.50292	2.50002	0.669559	0.00149784		1.0593	2.3624	0.546603	1.80675e-06
NOL4L	nucleolar protein 4 like	10.9889	14.7863	0.751541	0.0364259		8.34147	16.3365	0.546199	9.28204e-16
PRR12	proline rich 12	2.37514	2.40302	0.976492	0.949886		1.4708	2.97905	0.544777	6.15313e-11
CHAMP1	chromosome alignment maintaining phosphoprotein 1	2.95291	5.00963	0.647538	0.00023397		2.08392	4.33094	0.543827	2.23872e-08
NKX2-2	NK2 homeobox 2	0.983423	1.60032	0.758925	0.167256		0.638553	1.52347	0.539458	2.54162e-06
SORBS3	sorbin and SH3 domain containing 3	4.44086	5.85078	0.77109	0.0787257		3.64168	7.21568	0.537415	3.35238e-20
MBD6	methyl-CpG binding domain protein 6	5.00729	6.06093	0.860815	0.485919		3.47795	7.22315	0.537186	9.20704e-11
SAMD4B	sterile alpha motif domain containing 4B	5.52689	6.86693	0.823351	0.237116		3.67105	7.31657	0.536861	3.92709e-18
FAM222B	family with sequence similarity 222 member B	3.35979	4.8508	0.739681	0.0489922		2.29483	4.73744	0.533025	2.91357e-12
RABL2B	RAB, member of RAS oncogene family-like 2B	0.860414	1.41456	0.701211	0.018085		0.631449	1.44495	0.531616	1.75241e-07
DCHS2	dachsous cadherin-related 2	1.01477	0.819326	1.02972	0.92416		0.106246	0.407677	0.531246	3.79562e-05
GLP1R	glucagon like peptide 1 receptor	2.11777	0.85457	1.09663	0.604169		0.236475	1.13829	0.529862	3.92391e-05
SP2	Sp2 transcription factor	1.76724	2.13915	0.85434	0.485919		1.02908	2.26263	0.52955	5.19633e-09
SST	somatostatin	68.3438	107.721	0.847232	0.477462		47.9606	116.801	0.528057	5.17817e-09
SPI1	Spi-1 proto-oncogene	4.81352	6.15525	0.80564	0.144099		3.85497	8.28161	0.524607	2.43388e-11
BGN	biglycan	2.24075	2.53175	0.906703	0.728999		1.718	3.88381	0.524063	6.11269e-09
NRSN2	neurensin 2	1.15671	1.81224	0.716049	0.0248848		0.827493	1.99496	0.519999	1.54492e-07
ZMIZ1	zinc finger MIZ-type containing 1	9.7124	10.7632	0.898227	0.67458		5.70289	11.8793	0.517241	1.39209e-15
SEMA4G	semaphorin 4G	13.7077	16.8707	0.802702	0.218576		9.67469	20.4202	0.51613	2.15775e-16
CAPN6	calpain 6	0.655811	0.630437	1.00268	0.994675		0.145646	0.566399	0.514192	1.10714e-05
SCAMP4	secretory carrier membrane protein 4	4.70844	6.81357	0.717318	0.00477084		3.74084	7.92253	0.51216	6.54944e-19
BCL9L	B-cell CLL/lymphoma 9-like	3.36431	4.82825	0.728302	0.00411325		2.56406	5.57358	0.511769	9.57223e-13
NPIPB3	nuclear pore complex interacting protein family member B3	0.238486	0.235102	0.997625	0.999959		0.114252	0.406066	0.508252	7.98459e-06
PPDPF	pancreatic progenitor cell differentiation and proliferation factor	28.3199	41.7905	0.674091	4.54855e-05		25.1044	54.4943	0.50531	4.20922e-17
SLC9A1	solute carrier family 9 member A1	7.87271	9.87621	0.823448	0.354699		5.2562	12.6392	0.502352	6.12497e-10
RP11-793H13.3	0	2.68064	3.15483	0.866613	0.561661		1.39724	3.24524	0.501903	1.48173e-09
NFIC	nuclear factor I C	2.8116	4.0715	0.763994	0.102556		1.74774	4.02694	0.49401	1.14388e-11
C15orf39	chromosome 15 open reading frame 39	4.9462	7.18528	0.713455	0.00156166		3.75748	8.26366	0.491211	1.20248e-25
S100A11	S100 calcium binding protein A11	38.1045	124.688	0.464706	1.41949e-10		41.2927	102.031	0.489985	1.76008e-09
SLC25A23	solute carrier family 25 member 23	13.1203	20.7374	0.64559	0.000134307		10.6225	25.3799	0.475612	1.66912e-15
ARHGDIA	Rho GDP dissociation inhibitor alpha	39.3564	76.3093	0.532699	1.56957e-22		37.2956	88.2544	0.449298	3.39373e-39
PRR4	proline rich 4 (lacrimal)	10.2973	10.373	0.987645	0.966626		1.41581	7.53877	0.441746	2.80918e-08
MYADM	myeloid-associated differentiation marker	4.03866	6.1135	0.713853	0.0101218		2.60783	6.87643	0.440223	2.87708e-16
PRKACA	protein kinase cAMP-activated catalytic subunit alpha	7.2511	12.4132	0.626027	3.05713e-06		5.20761	13.7545	0.432777	5.73991e-19
SERPING1	serpin family G member 1	6.9962	12.0335	0.670608	0.00409411		4.60236	13.6902	0.411426	4.20922e-17
CCKAR	cholecystokinin A receptor	2.23756	1.00502	1.03978	0.799566		0.101165	1.30634	0.4025	2.82859e-10
IGFBP7-AS1	IGFBP7 antisense RNA 1	23.2425	10.4936	1.54933	0.00334532		21.6128	16.9337	1.2303	0.203974
HCG4B	HLA complex group 4B (non-protein coding)	11.989	5.69886	1.54428	0.00200921		8.18908	6.36122	1.20008	0.280625
NSRP1	nuclear speckle splicing regulatory protein 1	5.4705	3.38783	1.51565	1.16008e-07		5.01763	3.40458	1.42656	5.71964e-05
PYY	peptide YY	8.88529	1.91765	1.50831	0.00683687		2.39575	1.94086	1.19069	0.335982
SORD	sorbitol dehydrogenase	15.0683	26.1906	0.662927	0.00236931		20.7014	26.1092	0.830237	0.182685
MMACHC	methylmalonic aciduria (cobalamin deficiency) cblC type, with homocystinuria	8.15111	12.9435	0.656558	8.04947e-07		8.59666	10.7398	0.848489	0.129024
BCL2L1	BCL2 like 1	24.9856	39.6025	0.655824	5.55347e-07		27.4521	40.953	0.708842	3.27532e-05
CDH3	cadherin 3	0.243728	0.976121	0.653922	0.00512231		0.251762	0.178665	1.1256	0.606778
SLC25A17	solute carrier family 25 member 17	3.47483	5.55627	0.647694	3.08172e-07		3.79019	5.13931	0.787092	0.0300335
KRT7	keratin 7	0.482497	2.57181	0.645859	0.00201129		0.608782	0.406383	1.09143	0.722621
KLK11	kallikrein related peptidase 11	0.862972	1.69616	0.635261	0.00138044		0.694634	0.844318	0.927304	0.766771
RPL39	ribosomal protein L39	80.37	155.074	0.61564	0.00011938		88.2002	127.598	0.766718	0.0395029

## Sheet: BaseEndAllPolyp
Gene Name	Description	RPKM_DrugNormBase	RPKM_DrugPolypEnd	DrugPolypEndBase_Fold	DrugPolypEndBase_FDR		RPKM_PlaceboNormBase	RPKM_PlaceboPolypEnd	PlaceboPolypEndBase_Fold	PlaceboPolypEndBase_FDR
CAPN6	calpain 6	0.655811	1.42231	1.1965	0.391587		0.145646	2.05321	6.41513	1.37964e-26
PRR4	proline rich 4 (lacrimal)	10.2973	24.6845	1.20305	0.319501		1.41581	42.2341	5.03943	7.54368e-15
AC104654.1		0.634411	1.6128	1.31109	0.125976		0.0687286	1.284	4.93644	4.3394e-15
ATP6V0A4	ATPase H+ transporting V0 subunit a4	0.147969	0.17003	1.01795	0.949941		0.0204574	0.353671	4.93472	1.16526e-15
CCNO	cyclin O	0.477424	1.10211	1.29902	0.16978		0.0971315	1.17876	4.21067	1.31698e-12
NWD1	NACHT and WD repeat domain containing 1	0.191379	0.298732	1.09898	0.678614		0.0204881	0.276299	4.15588	3.98382e-12
GLYATL2	glycine-N-acyltransferase like 2	0.180274	0.355909	1.10665	0.587644		0.0152547	0.426185	3.92462	1.55208e-10
TMEM213	transmembrane protein 213	0.156552	0.306372	1.20303	0.363287		0.0632976	0.525043	3.73839	1.64421e-11
AQP2	aquaporin 2	0.0605684	0.240763	1.24319	0.162361		0	0.099708	3.6893	1.59677e-09
S100A11	S100 calcium binding protein A11	38.1045	180.254	2.66201	8.45824e-15		41.2927	172.197	3.46014	1.16836e-27
C17orf77	chromosome 17 open reading frame 77	0.113216	0.414861	1.29799	0.11169		0.0238355	0.417074	3.4572	8.99963e-09
FOXQ1	forkhead box Q1	7.48165	16.0809	1.31958	0.142169		4.3912	18.7582	3.44064	5.61856e-21
CLDN2	claudin 2	7.76673	25.7167	1.51988	0.0137267		2.7499	20.1487	3.39319	2.27927e-09
MUC1	mucin 1, cell surface associated	8.85767	7.41642	0.949316	0.839799		0.978651	12.0857	3.38378	1.35263e-08
HABP2	hyaluronan binding protein 2	2.96778	3.33265	1.01215	0.968755		0.48937	4.57436	3.34405	8.52738e-09
GP2	glycoprotein 2	36.5698	72.2118	1.13675	0.495345		4.36875	95.4188	3.33158	3.20841e-08
VEPH1	ventricular zone expressed PH domain containing 1	0.333448	0.26386	0.898893	0.623398		0.0320639	0.29807	3.2919	1.23103e-08
MCIDAS	multiciliate differentiation and DNA synthesis associated cell cycle protein	0.0398091	0.211793	1.4276	0.0238779		0.0020956	0.181705	3.25914	5.45691e-08
CRISP2	cysteine rich secretory protein 2	0.348857	0.508047	1.05623	0.999875		0.0509625	0.613043	3.25872	3.20158e-08
NANOS3	nanos C2HC-type zinc finger 3	0.348189	2.90719	2.1443	4.39716e-07		0.315444	1.90474	3.23792	6.01857e-11
RP1-60O19.1		0.260713	0.416967	1.11186	0.617291		0.0225263	0.407329	3.21433	8.08617e-08
TFCP2L1	transcription factor CP2-like 1	6.44029	1.42561	0.784321	0.18956		0.334369	1.79165	3.17638	1.47706e-10
VTCN1	V-set domain containing T cell activation inhibitor 1	0.16399	0.381819	1.18838	0.395773		0.0418936	0.470742	3.16644	8.39901e-08
CEACAM5	carcinoembryonic antigen related cell adhesion molecule 5	111.722	36.3194	0.88979	0.617408		12.1161	48.3375	3.15543	5.3721e-25
PKHD1	polycystic kidney and hepatic disease 1 (autosomal recessive)	0.0845615	0.153446	1.10021	0.688342		0.0161717	0.260341	3.15236	1.40288e-07
CALN1	calneuron 1	0.0407233	0.0595188	1.03044	0.999875		0.003789	0.0757037	3.15076	1.40288e-07
TNS4	tensin 4	0.4556	5.41505	1.58288	0.00209633		0.188676	3.42958	3.13464	1.66548e-07
CYP4X1	cytochrome P450 family 4 subfamily X member 1	1.76044	4.03719	1.3582	0.101639		0.756966	3.81406	3.12894	3.68734e-12
SOD3	superoxide dismutase 3, extracellular	5.68459	7.04649	1.06811	0.795944		1.85328	7.67638	3.10128	3.21285e-17
FAM189A2	family with sequence similarity 189 member A2	1.47506	1.94141	1.03998	0.890739		0.491988	2.32387	3.09192	4.38994e-12
FMOD	fibromodulin	23.959	32.8426	1.04447	0.870008		6.30746	35.4836	3.09072	4.22708e-09
KSR2	kinase suppressor of ras 2	0.216571	0.185329	0.97861	0.943084		0.0352627	0.153538	3.08226	3.97268e-13
CLDN1	claudin 1	0.650593	2.69548	1.81382	0.000161093		0.52185	2.90938	3.08132	3.58031e-09
ERBB4	erb-b2 receptor tyrosine kinase 4	0.0790816	0.109995	1.06674	0.776822		0.0238095	0.12752	3.06961	2.09698e-09
PRH1-PRR4		6.47123	12.2006	1.23434	0.30628		2.97469	18.2824	3.06167	3.61409e-09
COLCA1	colorectal cancer associated 1	3.21609	7.13467	1.36076	0.0924232		1.11142	5.96252	3.04556	3.57684e-09
DCHS2	dachsous cadherin-related 2	1.01477	1.2689	1.04123	0.869473		0.106246	1.18842	3.04016	3.15075e-07
KCNE2	potassium voltage-gated channel subfamily E regulatory subunit 2	8.11921	7.82994	0.98096	0.937877		1.42221	11.8684	3.00602	3.00826e-07
CD24	CD24 molecule	82.2135	165.04	1.32189	0.143791		31.3322	143.329	3.00192	1.81085e-10
SLC16A2	solute carrier family 16 member 2	2.47412	5.94623	1.52599	0.00769801		1.28886	6.75219	2.99568	3.56863e-09
ENTPD3	ectonucleoside triphosphate diphosphohydrolase 3	1.47029	1.83547	1.01427	0.963626		0.409966	2.06725	2.97571	1.94244e-09
CHRM1	cholinergic receptor muscarinic 1	0.252248	0.256641	0.963261	0.892386		0.0595957	0.321008	2.97125	1.68156e-08
ECM1	extracellular matrix protein 1	3.32517	12.0514	1.97564	2.8053e-06		2.94261	11.6146	2.96566	5.83296e-16
EPHB1	EPH receptor B1	0.520446	2.01037	1.85107	8.25979e-05		0.322869	2.40975	2.95179	3.46948e-07
FREM2	FRAS1 related extracellular matrix protein 2	0.338596	0.400877	1.05371	0.848794		0.121577	0.475566	2.93935	3.56199e-12
PSCA	prostate stem cell antigen	0.898654	1.34488	1.16513	0.490402		0.380202	2.12306	2.92365	4.65601e-08
TENM3	teneurin transmembrane protein 3	1.95944	3.04533	1.34429	0.0561983		0.710941	4.03223	2.92014	5.45922e-08
CDR1	cerebellar degeneration related protein 1	2.60556	5.0668	1.14158	0.516021		0.603909	5.2846	2.90341	7.44222e-07
DPCR1	diffuse panbronchiolitis critical region 1	0.133357	2.42977	1.55723	0.00243029		0.08022	4.72785	2.86289	1.16659e-06
CLDN18	claudin 18	1.75539	2.25387	1.13175	0.591491		0.592019	6.20997	2.86137	1.48787e-06
KCNN4	potassium calcium-activated channel subfamily N member 4	5.73179	9.26215	1.11539	0.635463		1.39759	8.61704	2.84784	6.70214e-07
SPATA12	spermatogenesis associated 12	0.117931	0.412298	1.37474	0.064664		0.05587	0.349331	2.84176	5.75818e-07
NRAP	nebulin related anchoring protein	0.261176	0.187503	0.897791	0.631752		0.0473351	0.242296	2.84161	6.98999e-08
CCKBR	cholecystokinin B receptor	0.0845721	0.146735	1.07287	0.684722		0.02536	0.230085	2.83071	1.73991e-06
MYADM	myeloid-associated differentiation marker	4.03866	7.12797	1.44004	0.0220703		2.60783	8.30644	2.81937	7.11613e-28
C14orf105	chromosome 14 open reading frame 105	0.886449	2.47764	1.4503	0.0362023		0.430973	2.71449	2.80356	1.07384e-06
ATP13A4	ATPase 13A4	1.86651	0.993319	0.874868	0.473284		0.15242	1.26442	2.79827	2.01018e-06
FOXC1	forkhead box C1	0.759424	1.62516	1.2553	0.259412		0.272953	1.09733	2.79626	4.44858e-10
SIX4	SIX homeobox 4	0.231459	0.382051	1.21565	0.351157		0.122337	0.429361	2.7911	1.77886e-14
GLP1R	glucagon like peptide 1 receptor	2.11777	2.15723	0.983986	0.953296		0.236475	2.18633	2.77008	3.29166e-06
SLPI	secretory leukocyte peptidase inhibitor	9.41091	9.65363	1.00701	0.981942		0.682615	9.33606	2.76958	3.66133e-06
MSX2	msh homeobox 2	1.49511	4.76937	1.57835	0.00490003		0.594652	7.4256	2.75423	4.18873e-06
SERPING1	serpin family G member 1	6.9962	12.8799	1.53713	0.00165249		4.60236	14.3651	2.75081	1.69381e-28
RASAL1	RAS protein activator like 1	0.751548	2.1122	1.24529	0.24711		0.324155	1.90293	2.74568	1.69897e-06
VSIG1	V-set and immunoglobulin domain containing 1	1.41871	3.00766	1.29567	0.183794		0.951037	4.49385	2.74375	1.65704e-07
VWA2	von Willebrand factor A domain containing 2	1.94398	4.26808	1.43954	0.0247997		0.976586	3.57046	2.74362	4.46446e-13
DCDC2	doublecortin domain containing 2	0.461259	0.576242	1.02529	0.923859		0.0755255	0.430614	2.74262	1.2068e-06
GIF	gastric intrinsic factor	1.52581	1.2201	0.914071	0.705887		0.234644	1.40461	2.73409	1.5044e-06
RP11-364P22.1		0.00861494	0.146442	1.31845	0.999875		0	0.294432	2.72486	3.37097e-06
SOX9	SRY-box 9	11.8594	23.2852	1.34957	0.0893137		5.43731	20.3322	2.72153	8.85489e-11
SLC35E4	solute carrier family 35 member E4	0.958073	1.92415	1.30878	0.163657		0.723396	2.65052	2.70941	3.90361e-09
CLIC6	chloride intracellular channel 6	0.94195	1.37356	1.09859	0.701015		0.424795	1.65893	2.69604	7.27149e-09
ZG16B	zymogen granule protein 16B	17.2404	16.1087	0.930112	0.7799		3.72226	18.8061	2.66887	9.33831e-07
ALDH1L1	aldehyde dehydrogenase 1 family member L1	1.51172	0.279706	0.771221	0.125207		0.078118	0.368715	2.66867	1.12643e-06
DPPA3	developmental pluripotency associated 3	0.175702	0.368755	1.04302	0.778487		0	0.341674	2.66643	5.43189e-06
CCAT1	colon cancer associated transcript 1 (non-protein coding)	0.419274	2.69456	1.43943	0.0288078		0.27152	1.25919	2.66267	4.11867e-07
PDILT	protein disulfide isomerase like, testis expressed	0.116503	0.353622	1.16585	0.336428		0.00211044	0.220434	2.65839	6.21516e-06
CAPN11	calpain 11	0.139007	0.279589	1.15041	0.525789		0.0297826	0.246019	2.65396	6.24461e-06
CHI3L1	chitinase 3 like 1	0.130778	0.380495	1.46224	0.0302405		0.0751625	0.49718	2.64504	6.50465e-06
CA12	carbonic anhydrase 12	26.7698	2.59301	0.747972	0.057754		0.293748	1.75684	2.6445	6.32537e-06
FOSL1	FOS like 1, AP-1 transcription factor subunit	0.121375	1.77334	1.79925	0.000103069		0.169655	0.84375	2.62392	2.33656e-06
NPIPB3	nuclear pore complex interacting protein family member B3	0.238486	0.318553	1.11033	0.654415		0.114252	0.456844	2.61561	3.21962e-08
GLIS3	GLIS family zinc finger 3	1.41532	1.95553	1.06418	0.814107		0.529429	1.92634	2.61501	2.68782e-12
KLK11	kallikrein related peptidase 11	0.862972	3.81213	1.9527	1.17354e-05		0.694634	2.77854	2.609	2.63933e-08
GOLM1	golgi membrane protein 1	194.613	197.185	0.933615	0.791022		79.0068	295.289	2.60428	8.70341e-09
UNC5A	unc-5 netrin receptor A	0.268154	0.40308	1.07196	0.774449		0.0740963	0.335368	2.59894	1.6828e-06
C2orf70	chromosome 2 open reading frame 70	0.242246	0.751407	1.27191	0.183712		0.0377046	0.466774	2.59057	1.63653e-05
FUT1	fucosyltransferase 1 (H blood group)	1.30755	1.52522	1.05608	0.840952		0.510159	1.81174	2.58231	3.01258e-10
GDF15	growth differentiation factor 15	3.89498	10.829	1.29494	0.16662		2.10093	10.6349	2.56875	5.06768e-06
VSIG2	V-set and immunoglobulin domain containing 2	29.8934	30.3497	1.00355	0.990927		3.10748	29.1109	2.56707	2.04538e-05
C16orf89	chromosome 16 open reading frame 89	7.63163	6.53649	0.95401	0.843854		1.2762	8.80264	2.56353	1.37251e-05
TESC	tescalcin	5.7222	11.3444	1.28609	0.200592		2.5295	9.43786	2.55544	2.6178e-08
REPS2	RALBP1 associated Eps domain containing 2	4.59679	7.88149	1.27807	0.137665		2.34538	8.0326	2.54552	2.28963e-12
KCNJ15	potassium voltage-gated channel subfamily J member 15	0.486928	0.760949	1.05187	0.797393		0.0526454	1.21485	2.54065	1.97862e-05
RHBDL2	rhomboid like 2	2.65532	2.05893	0.95475	0.859174		0.433431	1.71892	2.53965	7.93107e-07
PRSS22	protease, serine 22	0.642481	1.31374	1.2351	0.302323		0.254015	1.20499	2.52596	2.74746e-06
ZBTB7C	zinc finger and BTB domain containing 7C	5.49259	5.66965	1.05011	0.85955		1.33097	4.48959	2.52095	7.87055e-10
NFIC	nuclear factor I C	2.8116	5.14796	1.40245	0.0219597		1.74774	4.97713	2.5148	7.62243e-24
CRNDE	colorectal neoplasia differentially expressed (non-protein coding)	0.279057	0.899966	1.44194	0.0364868		0.0671497	0.439121	2.51221	2.54583e-05
PITPNM3	PITPNM family member 3	1.03887	1.87962	1.31666	0.152831		0.458652	1.51711	2.50136	6.87433e-09
RP11-793H13.3		2.68064	4.23441	1.25976	0.181769		1.39724	4.17195	2.49988	1.48531e-15
TP53I11	tumor protein p53 inducible protein 11	4.85635	9.20119	1.48991	0.00998407		2.80479	8.4825	2.49693	5.73647e-19
GLIS3-AS1	GLIS3 antisense RNA 1	0.513167	0.440065	0.892892	0.625213		0.117943	0.685352	2.49642	2.58956e-05
FOXA2	forkhead box A2	3.02561	3.4921	1.04697	0.866416		1.0607	3.30447	2.49334	1.47159e-12
HS6ST3	heparan sulfate 6-O-sulfotransferase 3	0.452612	0.659469	1.197	0.395548		0.177503	0.598782	2.49105	1.30855e-07
KLK10	kallikrein related peptidase 10	0.0428102	1.16598	1.44738	0.00684999		0.108613	1.40802	2.48194	4.11303e-05
GRIN2D	glutamate ionotropic receptor NMDA type subunit 2D	0.339629	1.36579	1.66326	0.00198332		0.2563	1.07479	2.47577	9.39847e-07
CEMIP	cell migration inducing hyaluronan binding protein	0.948608	6.64783	1.50461	0.0104026		0.963661	5.86664	2.47396	3.74466e-05
PCDHGA3	protocadherin gamma subfamily A, 3	1.50292	2.68024	1.47528	0.00438279		1.0593	2.98274	2.46455	1.71768e-27
LINGO1	leucine rich repeat and Ig domain containing 1	0.264986	0.263315	0.945614	0.832359		0.0714523	0.285743	2.46455	5.66743e-06
FRAS1	Fraser extracellular matrix complex subunit 1	0.782333	0.947406	1.03183	0.898077		0.404478	1.29132	2.4634	3.00181e-11
PCDHGA1	protocadherin gamma subfamily A, 1	1.49342	2.70067	1.4939	0.00256895		1.05691	2.9737	2.46263	9.98542e-27
AK4	adenylate kinase 4	2.0168	4.4785	1.22012	0.331528		0.841188	3.88492	2.46239	2.02809e-05
PCDHGC4	protocadherin gamma subfamily C, 4	1.51939	2.6836	1.46513	0.00511086		1.06475	2.98892	2.45895	1.31281e-27
LRRC36	leucine rich repeat containing 36	0.241995	0.372363	1.14463	0.553269		0.117388	0.437924	2.4585	8.08584e-07
GYLTL1B	#N/A	1.07413	1.64066	1.20508	0.36725		0.505571	1.53921	2.45828	1.03222e-10
FBP2	fructose-bisphosphatase 2	3.97291	8.4883	1.34517	0.105303		2.40506	8.87363	2.45054	1.23376e-06
MFSD4	#N/A	4.94199	1.95224	0.783593	0.206186		0.69477	2.29056	2.44927	5.46441e-10
PVRL4	#N/A	0.74023	1.90563	1.33344	0.130672		0.359991	1.62423	2.44863	2.02809e-05
PCDHGC5	protocadherin gamma subfamily C, 5	1.50421	2.66844	1.47418	0.00421149		1.04783	2.92745	2.44692	4.67926e-28
CLDN10	claudin 10	0.739588	0.706894	0.98422	0.950022		0.0605542	1.28607	2.44015	4.51412e-05
MSI1	musashi RNA binding protein 1	1.80913	3.81837	1.66722	4.76388e-06		1.17428	3.39627	2.43875	3.60854e-15
SLC28A3	solute carrier family 28 member 3	0.904819	1.58389	1.26419	0.223135		0.431509	1.34163	2.43804	5.82926e-13
SLC38A11	solute carrier family 38 member 11	4.04047	5.88952	1.19042	0.36314		1.9944	6.92215	2.42792	9.79854e-07
PRSS21	protease, serine 21	0.652186	0.99498	1.12145	0.6183		0.3261	1.42739	2.42782	1.73754e-05
SYNPR	synaptoporin	0.238529	0.401539	1.04882	0.861142		0.0669016	0.403237	2.42568	5.92477e-05
CREB3L1	cAMP responsive element binding protein 3 like 1	11.6315	16.1453	1.1455	0.547233		4.77908	14.9109	2.4243	1.41877e-10
PCDHGA5	protocadherin gamma subfamily A, 5	1.59512	2.80995	1.46959	0.00416377		1.1165	3.09302	2.41929	1.93977e-26
PCDHGA2	protocadherin gamma subfamily A, 2	1.4872	2.57437	1.44602	0.00660202		1.04591	2.8811	2.418	6.94645e-27
SYNPR-AS1	SYNPR antisense RNA 1	0.591298	1.09459	1.19767	0.395548		0.211205	1.01428	2.41458	3.51456e-05
BCL9	B-cell CLL/lymphoma 9	2.42585	3.87692	1.35332	0.0277096		1.42939	3.97858	2.41297	1.1882e-26
NKD1	naked cuticle homolog 1	1.62219	4.00272	1.56939	0.00706729		0.855063	3.42116	2.4055	1.11688e-05
ACPP	acid phosphatase, prostate	1.24955	1.67392	1.08564	0.741266		0.457219	1.64032	2.40529	2.83853e-07
KANK4	KN motif and ankyrin repeat domains 4	0.303174	0.19534	0.869194	0.477936		0.0436459	0.224417	2.4049	3.22475e-05
PCDHGA4	protocadherin gamma subfamily A, 4	1.53228	2.66392	1.4557	0.0053094		1.07428	2.93256	2.40328	2.05168e-29
LGR6	leucine rich repeat containing G protein-coupled receptor 6	0.427894	1.91399	1.59625	0.00458		0.252209	1.44711	2.39772	7.22216e-05
TMEM163	transmembrane protein 163	0.684952	1.51064	1.3859	0.0740996		0.476847	1.63664	2.39144	4.36368e-07
KCNC4	potassium voltage-gated channel subfamily C member 4	0.976976	1.67128	1.20824	0.359725		0.512308	1.51987	2.39111	5.11372e-10
PCDHGA10	protocadherin gamma subfamily A, 10	2.2323	3.74005	1.40708	0.00868408		1.50272	4.11449	2.38944	4.49187e-27
SLC1A2	solute carrier family 1 member 2	0.156085	0.211616	1.05854	0.82872		0.0650684	0.227929	2.38834	4.85217e-07
KIF26B	kinesin family member 26B	0.452177	0.599582	1.0712	0.79044		0.247404	0.862294	2.38616	7.79496e-07
PRKACA	protein kinase cAMP-activated catalytic subunit alpha	7.2511	12.8854	1.61444	1.05198e-05		5.20761	13.686	2.38425	3.06718e-31
PLCB4	phospholipase C beta 4	5.21853	5.44335	1.00693	0.984828		1.10253	4.2519	2.38298	6.03372e-06
OXGR1	oxoglutarate receptor 1	0.215691	0.410954	1.14839	0.526978		0.0813812	0.32903	2.38236	2.11856e-05
SERPINA5	serpin family A member 5	2.66201	3.55397	1.05009	0.82222		0.1832	3.2255	2.38126	7.56662e-05
SULT1C2P1	sulfotransferase family 1C member 2 pseudogene 1	0.351232	0.358402	1.01661	0.958869		0.18382	0.718735	2.37496	1.71472e-05
TACSTD2	tumor-associated calcium signal transducer 2	0.858962	9.28165	1.6082	0.0026862		1.05252	6.94493	2.37473	0.000100433
PCDHGB1	protocadherin gamma subfamily B, 1	1.59141	2.753	1.44633	0.00664715		1.12377	3.03465	2.37151	2.05439e-26
C1orf64	chromosome 1 open reading frame 64	0.238956	0.230984	0.994298	0.981887		0.00651346	0.272632	2.36983	7.05658e-05
PCDHGA12	protocadherin gamma subfamily A, 12	1.65287	2.81376	1.42957	0.00920193		1.16235	3.12062	2.36251	3.05824e-28
CTNNA2	catenin alpha 2	0.457495	0.543781	1.04943	0.860964		0.169411	0.586341	2.35498	3.31176e-06
NEBL	nebulette	1.39792	1.7728	1.08495	0.747468		0.439662	1.49816	2.35344	3.14721e-06
AP000330.8	#N/A	0.363287	0.515124	1.11924	0.617281		0.177031	0.579674	2.35077	4.0407e-07
RIMKLA	ribosomal modification protein rimK-like family member A	1.30324	0.980465	0.989707	0.974241		0.344303	0.986375	2.3498	4.14548e-09
PCDHGA7	protocadherin gamma subfamily A, 7	1.51319	2.59708	1.44623	0.00478752		1.06497	2.85185	2.34971	8.30956e-25
SCGB2A1	secretoglobin family 2A member 1	1.46465	0.956052	0.902127	0.626942		0.211317	1.05257	2.34844	8.80244e-05
STK32B	serine/threonine kinase 32B	0.507021	0.538959	0.957939	0.87792		0.204195	0.659418	2.33596	5.56552e-07
PCDHGA8	protocadherin gamma subfamily A, 8	1.3271	2.3076	1.44312	0.00756504		0.954736	2.53898	2.33328	4.20944e-25
GRIN2B	glutamate ionotropic receptor NMDA type subunit 2B	0.254943	0.721852	1.44378	0.0347856		0.0760828	0.49723	2.32942	0.000142612
ERN2	endoplasmic reticulum to nucleus signaling 2	15.7166	16.4072	1.02156	0.943352		5.62639	15.6697	2.32371	2.71371e-11
PAK7	#N/A	0.0663821	0.0765495	1.02669	0.927603		0.0198567	0.112332	2.31688	0.000146425
SULT1C2	sulfotransferase family 1C member 2	7.18459	12.7468	1.44313	0.0355018		6.62569	21.3598	2.31558	3.6858e-06
SERPINB5	serpin family B member 5	20.4317	71.5131	1.7536	0.000333917		16.3764	68.8244	2.30803	5.34612e-05
ZNF185	zinc finger protein 185 (LIM domain)	1.10828	3.65412	1.60236	0.00405098		0.884908	3.3217	2.3051	1.05648e-05
SPDEF	SAM pointed domain containing ETS transcription factor	12.3577	10.597	0.944672	0.832599		3.76195	10.7747	2.30106	1.88674e-10
DUOX2	dual oxidase 2	4.29302	4.68124	1.03116	0.886508		0.173433	5.93607	2.29679	0.000109941
C2orf66	chromosome 2 open reading frame 66	0.0913381	0.284445	1.34749	0.0918234		0.0421269	0.268016	2.29433	0.00019828
PCDHGA11	protocadherin gamma subfamily A, 11	1.71344	2.69115	1.33901	0.0376893		1.1329	2.94259	2.29421	2.37124e-28
NXF3	nuclear RNA export factor 3	0.371992	1.88451	1.33066	0.0741404		0.0892209	1.07822	2.29179	0.0001801
PCDHGB5	protocadherin gamma subfamily B, 5	1.89081	3.20564	1.40512	0.017789		1.29198	3.34741	2.28876	1.96371e-28
STRIP2	striatin interacting protein 2	0.324381	0.882342	1.39079	0.0719376		0.286126	0.918715	2.28745	3.47466e-07
GABRB3	gamma-aminobutyric acid type A receptor beta3 subunit	1.3977	1.81023	1.06073	0.815503		0.47349	2.04327	2.28397	0.000130474
TDGF1	teratocarcinoma-derived growth factor 1	0.443611	0.769057	1.18823	0.423525		0.124453	0.464976	2.28305	4.36852e-05
PCDHGA6	protocadherin gamma subfamily A, 6	1.63363	2.82223	1.45201	0.00532169		1.22055	3.15858	2.28012	8.16393e-27
GPR56	#N/A	5.81568	8.90527	1.219	0.302048		3.66162	9.92123	2.27635	1.42589e-12
BHLHE41	basic helix-loop-helix family member e41	2.53321	4.51807	1.20696	0.363003		1.39161	4.09602	2.27544	1.30726e-11
HPN	hepsin	0.469542	0.645872	1.12508	0.609672		0.196024	0.658253	2.27438	3.93259e-05
PCDHGB4	protocadherin gamma subfamily B, 4	1.69479	2.88982	1.43419	0.00701092		1.24388	3.21693	2.27365	4.90262e-24
RETNLB	resistin like beta	19.6696	37.882	1.36315	0.0968596		5.74764	15.0834	2.27236	8.54742e-07
PCDHGB3	protocadherin gamma subfamily B, 3	1.72399	2.83786	1.39177	0.0158396		1.22448	3.17303	2.2706	5.20593e-25
TENM2	teneurin transmembrane protein 2	0.788119	1.23595	1.24708	0.243184		0.521828	1.50257	2.27056	2.96762e-08
C2CD4B	C2 calcium dependent domain containing 4B	2.31137	4.71038	1.42395	0.0396689		1.70222	5.4242	2.26197	1.51847e-07
ACMSD	aminocarboxymuconate semialdehyde decarboxylase	0.934259	0.987332	1.11923	0.634194		0.459	1.90456	2.25997	7.53181e-05
EXPH5	exophilin 5	4.80408	4.18401	1.04148	0.883463		1.50657	4.16491	2.25737	1.07702e-12
KIAA1244	#N/A	6.69505	9.23787	1.08928	0.70865		2.82289	8.28459	2.25359	1.30968e-07
F5	coagulation factor V	0.939637	2.24843	1.17173	0.473758		0.3791	1.13585	2.25204	2.12154e-08
KAAG1	kidney associated antigen 1	0.186273	0.29648	1.07315	0.736298		0.0223019	0.24716	2.24998	0.000263808
KRT7	keratin 7	0.482497	7.03093	1.92064	1.15768e-05		0.608782	6.51561	2.24773	0.000266103
PCDHGA9	protocadherin gamma subfamily A, 9	1.83162	2.98154	1.37509	0.0245663		1.25983	3.23635	2.2448	1.78817e-25
LONRF2	LON peptidase N-terminal domain and ring finger 2	0.55019	0.641804	1.03048	0.91878		0.195981	0.593532	2.24367	5.26657e-07
HOXD-AS1	#N/A	1.30652	0.530364	0.890435	0.617166		0.173701	0.503269	2.24348	3.188e-07
PDZK1IP1	PDZK1 interacting protein 1	9.88965	18.874	1.29918	0.175721		4.8422	21.1349	2.24319	0.00015151
CDH3	cadherin 3	0.243728	3.31198	1.79905	8.22191e-05		0.251762	2.88627	2.24293	0.000267425
CASC2	cancer susceptibility candidate 2 (non-protein coding)	0.207509	0.269499	1.034	0.905946		0.0985837	0.288621	2.24284	5.12817e-07
PLEKHB1	pleckstrin homology domain containing B1	3.27667	6.57851	1.5372	0.00163218		2.57559	7.19463	2.23924	1.22053e-12
EFHC2	EF-hand domain containing 2	0.581289	1.04863	1.22555	0.276263		0.355624	1.1317	2.23443	5.21898e-07
PCDHGB2	protocadherin gamma subfamily B, 2	1.73824	2.90951	1.40692	0.0111724		1.26506	3.20681	2.23212	1.70844e-21
B4GALNT3	beta-1,4-N-acetyl-galactosaminyltransferase 3	4.7259	3.50696	0.992672	0.982882		0.971959	3.89601	2.22983	0.000168797
ADRA2A	adrenoceptor alpha 2A	6.56843	14.4639	1.53175	0.00275787		4.80853	13.3182	2.22949	3.85142e-12
VWDE	von Willebrand factor D and EGF domains	0.284052	0.239243	0.896424	0.642472		0.0716849	0.216606	2.2293	1.4465e-05
PCDHGB6	protocadherin gamma subfamily B, 6	1.82789	3.03552	1.40159	0.0125283		1.31797	3.36674	2.22845	3.93878e-23
MADCAM1	mucosal vascular addressin cell adhesion molecule 1	0.514131	1.33864	1.74741	0.000192965		0.373314	1.0852	2.22844	2.59551e-06
RABL2B	RAB, member of RAS oncogene family-like 2B	0.860414	1.81132	1.84083	1.50983e-08		0.631449	1.61679	2.2261	1.02916e-14
GABRA5	gamma-aminobutyric acid type A receptor alpha5 subunit	0.0702474	0.154394	1.0709	0.999875		0.0056426	0.0866876	2.21876	0.000300379
DLGAP1	DLG associated protein 1	0.0804532	0.0637152	0.893507	0.625985		0.0206063	0.0895104	2.21849	0.000175729
PBOV1	prostate and breast cancer overexpressed 1	0.391504	0.397175	0.887095	0.601911		0.135046	0.44104	2.21795	4.6652e-05
IRX2	iroquois homeobox 2	0.0385423	0.255528	1.70161	0.000918328		0.0690804	0.354746	2.21763	0.000322979
ANKRD22	ankyrin repeat domain 22	2.35288	5.71655	1.41988	0.0494168		1.44856	4.3993	2.21705	7.22985e-06
EPN3	epsin 3	3.08347	4.28086	1.1844	0.377979		1.69531	4.55687	2.21704	2.28963e-12
EPHB3	EPH receptor B3	5.38274	10.9748	1.32281	0.136987		3.07605	7.88134	2.21614	4.08459e-11
CPB1	carboxypeptidase B1	0.252887	0.870963	1.44837	0.0346731		0.145026	5.53759	2.21544	0.00022632
AXIN2	axin 2	9.86492	24.0093	1.48223	0.0237514		5.49096	18.4801	2.21359	4.36532e-05
SLC7A2	solute carrier family 7 member 2	2.09023	3.17386	1.32355	0.0585758		1.2741	3.46775	2.21145	1.08843e-09
EGR3	early growth response 3	0.190133	0.380655	1.19197	0.404095		0.121629	0.748355	2.20849	0.000407242
ODAM	odontogenic, ameloblast asssociated	2.03943	7.74567	1.39621	0.038508		1.15608	13.6498	2.20777	0.000341164
NKX6-2	NK6 homeobox 2	0.19641	0.123403	0.88102	0.999875		0.0251604	0.327536	2.20736	0.000357211
EGR1	early growth response 1	2.5186	4.20036	1.20736	0.372342		1.47823	11.2805	2.20611	0.000424229
NME5	NME/NM23 family member 5	0.413189	0.778378	1.266	0.233189		0.239923	0.833127	2.20318	7.58515e-05
KCNH8	potassium voltage-gated channel subfamily H member 8	0.730722	0.986097	1.08089	0.73803		0.35355	0.975672	2.20104	9.76596e-08
KCNMB2	potassium calcium-activated channel subfamily M regulatory beta subunit 2	0.585114	0.66015	0.991685	0.977617		0.264795	0.802108	2.19725	9.45531e-07
DBNDD1	dysbindin (dystrobrevin binding protein 1) domain containing 1	0.787516	1.91929	1.44287	0.0205144		0.288062	0.770943	2.19696	8.22758e-08
LCN2	lipocalin 2	13.4275	22.0114	1.15532	0.493973		5.49811	34.1881	2.19674	0.000460285
SERPINA3	serpin family A member 3	7.13369	16.5454	1.22866	0.28631		1.08885	20.6022	2.19674	0.000298195
FAM155A-IT1	FAM155A intronic transcript 1	0.171403	0.304266	1.14907	0.53956		0.0974512	0.508816	2.19199	0.000409574
BACE2	beta-site APP-cleaving enzyme 2	6.26436	11.1065	1.30463	0.113507		4.31989	11.8547	2.19199	2.35739e-10
SLC5A5	solute carrier family 5 member 5	0.0366897	0.0357141	0.996467	0.999875		0.0177724	0.126194	2.18891	0.000486888
CADPS	calcium dependent secretion activator	4.68863	9.40306	1.43497	0.0204993		2.26537	7.40353	2.18734	3.18899e-05
ANO1	anoctamin 1	1.23361	2.27769	1.15466	0.523387		0.537092	1.57959	2.18253	3.34352e-07
NR4A2	nuclear receptor subfamily 4 group A member 2	0.911866	1.93617	1.29328	0.189197		0.53591	2.8209	2.18138	0.000468689
ATF7	activating transcription factor 7	3.59486	5.10435	1.15856	0.409452		2.03538	5.12867	2.17876	4.19187e-17
CHAMP1	chromosome alignment maintaining phosphoprotein 1	2.95291	5.44335	1.57487	1.00045e-05		2.08392	5.13791	2.17568	3.63983e-16
OR51E1	olfactory receptor family 51 subfamily E member 1	0.400548	1.07673	1.52864	0.00617325		0.322942	1.06785	2.17564	8.04405e-05
SEZ6L2	seizure related 6 homolog like 2	5.6711	9.429	1.32113	0.0871167		3.62751	9.68454	2.17554	1.66845e-08
IL1R2	interleukin 1 receptor type 2	5.40895	1.77365	0.84444	0.367671		0.244368	0.886463	2.17099	5.49938e-05
PPP1R1B	protein phosphatase 1 regulatory inhibitor subunit 1B	51.1052	89.0403	1.3808	0.0254382		32.2431	80.9872	2.16449	4.26305e-17
PTPRZ1	protein tyrosine phosphatase, receptor type Z1	0.502234	0.583572	0.920841	0.743937		0.173307	0.4948	2.16246	4.41976e-07
MSLN	mesothelin	2.47444	7.61891	1.56486	0.00736919		2.42438	8.71341	2.16047	3.4823e-05
HOXA4	homeobox A4	0.865724	1.16983	1.24575	0.235876		0.444058	1.15926	2.15931	1.14956e-07
SPOCK1	sparc/osteonectin, cwcv and kazal-like domains proteoglycan (testican) 1	0.187916	0.185357	1.03245	0.914093		0.0425735	0.145385	2.15476	0.00024968
SP2	Sp2 transcription factor	1.76724	2.31696	1.18305	0.344245		1.02908	2.521	2.15412	2.17633e-19
ZMIZ1	zinc finger MIZ-type containing 1	9.7124	11.3712	1.08854	0.672178		5.70289	13.9214	2.15288	7.15081e-19
STMND1	stathmin domain containing 1	0.355312	0.310204	0.958175	0.838559		0.0383908	0.374607	2.15274	0.000631492
SHANK2-AS3	SHANK2 antisense RNA 3	0.174966	0.211822	1.05127	0.846354		0.0674826	0.261401	2.1508	0.000411822
GPT2	glutamic pyruvate transaminase (alanine aminotransferase) 2	2.10524	3.40302	1.18838	0.414975		1.00718	2.66639	2.14869	7.49966e-09
GJB4	gap junction protein beta 4	0.0486086	0.359111	1.40295	0.0334201		0.0261149	0.19873	2.14557	0.000677899
KIAA1549L	KIAA1549-like	0.0797478	0.35986	1.36706	0.0706984		0.0335633	0.122487	2.14432	0.000206338
PLEKHG4B	pleckstrin homology and RhoGEF domain containing G4B	0.0651331	0.0854242	1.04131	0.886448		0.0275092	0.0890678	2.14205	0.000125222
RAI2	retinoic acid induced 2	2.20738	3.30902	1.1944	0.302323		1.38973	3.64409	2.14005	1.26875e-09
CEACAM6	carcinoembryonic antigen related cell adhesion molecule 6	94.3936	228.475	1.40989	0.0572667		80.0565	234.471	2.13981	2.79779e-06
NOL4	nucleolar protein 4	0.0800247	0.109536	1.03067	0.917338		0.0326874	0.133683	2.13883	0.000487496
LOC284454	#N/A	2.20348	5.69533	1.21367	0.354461		1.63637	8.54269	2.13819	0.00065722
DMTN	dematin actin binding protein	2.0405	3.53605	1.2967	0.146954		1.31634	3.26278	2.13801	3.22297e-13
FAM222B	family with sequence similarity 222 member B	3.35979	5.42924	1.37389	0.0277672		2.29483	5.55016	2.13775	6.67018e-27
CASC16	cancer susceptibility candidate 16 (non-protein coding)	0.278435	0.329589	1.09119	0.727412		0.135612	0.490078	2.1371	0.00034734
TCN1	transcobalamin 1	12.1911	17.7873	1.06937	0.734338		0.583831	31.5258	2.13645	0.000353792
NRSN2	neurensin 2	1.15671	2.14115	1.62157	0.000121377		0.827493	2.04482	2.13613	2.6066e-12
NOTUM	NOTUM, palmitoleoyl-protein carboxylesterase	1.442	3.25651	1.46167	0.0315062		0.619993	3.27589	2.13431	0.000755149
KIAA1324	KIAA1324	31.7068	51.3632	1.3492	0.0224914		20.2236	52.1219	2.12376	8.71702e-12
S100P	S100 calcium binding protein P	18.5293	86.3088	1.22973	0.241109		7.77454	42.6351	2.12176	0.000701432
PROM2	prominin 2	5.7842	9.4936	1.25613	0.168368		3.40888	9.27827	2.12053	2.5809e-06
FXYD5	FXYD domain containing ion transport regulator 5	6.37884	14.6261	1.6686	9.52522e-05		4.86397	11.9022	2.11945	8.64575e-17
GJB3	gap junction protein beta 3	0.737817	3.87036	1.35531	0.0632329		0.400267	2.47681	2.11777	0.000862148
CCL11	C-C motif chemokine ligand 11	12.4389	22.126	1.20958	0.358326		8.91742	21.4966	2.11724	4.80466e-17
PRNCR1	prostate cancer associated non-coding RNA 1	0.158213	0.189522	0.985759	0.961055		0.0885863	0.241656	2.11717	1.13856e-06
LYPD5	LY6/PLAUR domain containing 5	0.207427	0.338896	1.24174	0.283525		0.132528	0.369656	2.11224	3.73157e-05
LINC01021	long intergenic non-protein coding RNA 1021	0.0104461	0.952695	1.46632	0.00438279		0	0.287502	2.11111	0.000378198
GKN2	gastrokine 2	0.363335	1.38634	1.23907	0.178854		0.319363	13.0891	2.11086	0.00046634
NKX2-2	NK2 homeobox 2	0.983423	1.65813	1.37524	0.0588184		0.638553	1.60036	2.10828	4.64457e-08
SLC41A1	solute carrier family 41 member 1	1.58714	2.60694	1.41084	0.0123306		1.00346	2.45847	2.10775	4.46189e-12
PLAC4	placenta specific 4	1.1003	1.43993	1.00904	0.978733		0.577823	1.97762	2.107	0.000209601
PHKA1	phosphorylase kinase regulatory subunit alpha 1	0.963097	1.77218	1.26348	0.218899		0.514396	1.34546	2.10609	6.90265e-08
ZMIZ1-AS1	ZMIZ1 antisense RNA 1	0.474118	0.585493	1.1064	0.647195		0.264481	0.895629	2.1039	0.000146399
DLGAP1-AS5	DLGAP1 antisense RNA 5	0.159099	0.113915	0.889247	0.595501		0.0280207	0.146324	2.10345	0.000899411
OPCML	opioid binding protein/cell adhesion molecule-like	0.0237047	0.0434777	1.12545	0.59291		0.00547116	0.0386976	2.09565	0.00101916
PCDHGB7	protocadherin gamma subfamily B, 7	2.0444	3.02123	1.28735	0.0759245		1.41323	3.33128	2.09544	1.05204e-23
PCDHGC3	protocadherin gamma subfamily C, 3	2.76944	4.26086	1.3422	0.0431518		1.92811	4.46354	2.09523	1.83659e-25
KRT23	keratin 23	0.354758	0.655135	1.31671	0.142092		0.328843	0.855549	2.09281	1.70744e-05
C9orf50	chromosome 9 open reading frame 50	0.14026	0.223718	1.09109	0.70251		0.0300681	0.16689	2.09239	0.00107337
LSAMP	limbic system-associated membrane protein	0.490216	0.789287	1.21915	0.324487		0.281551	0.703031	2.09155	8.16583e-09
NAV1	neuron navigator 1	2.47783	3.57731	1.20335	0.183794		1.56229	3.73936	2.09085	1.12348e-17
SERTAD4	SERTA domain containing 4	1.39172	1.88586	1.11097	0.646967		0.544113	1.4493	2.08723	8.43072e-06
IKZF4	IKAROS family zinc finger 4	0.409276	0.620252	1.14706	0.47866		0.246343	0.611357	2.08521	5.93016e-09
ARHGEF28	Rho guanine nucleotide exchange factor 28	5.47102	7.96039	1.11253	0.601274		3.14522	7.7091	2.08488	4.38919e-08
ARX	aristaless related homeobox	0.397966	0.565451	1.18398	0.382614		0.217709	0.638684	2.08438	0.000109261
ZFP36L1	ZFP36 ring finger protein-like 1	25.6744	39.9347	1.26403	0.110271		17.5349	41.1165	2.08418	1.50795e-17
PCAT18	prostate cancer associated transcript 18 (non-protein coding)	0.213351	0.27674	1.03011	0.999875		0.0513058	0.200275	2.08267	0.000811433
EFR3B	EFR3 homolog B	0.441491	0.457084	0.846993	0.383586		0.238947	0.62874	2.08108	4.4775e-06
FABP6	fatty acid binding protein 6	0.187726	2.58778	1.34675	0.0351741		0.21732	0.962957	2.07705	0.00107423
ZNRF3-AS1	ZNRF3 antisense RNA 1	0.268102	0.412248	1.11813	0.634194		0.128936	0.43291	2.07674	0.000425774
EPB41L1	erythrocyte membrane protein band 4.1 like 1	3.95	6.58499	1.24197	0.245253		2.38988	5.78926	2.07321	1.28844e-12
RFX7	regulatory factor X7	5.67828	8.3866	1.33085	0.00317959		3.65567	8.569	2.06955	1.57972e-15
CAPN8	calpain 8	7.49068	10.7343	1.11187	0.651287		3.24502	9.84187	2.06792	0.000190381
KIAA1549	KIAA1549	0.958985	1.50119	1.19365	0.308633		0.531951	1.38726	2.06463	4.05476e-07
DCX	doublecortin	0.110583	0.190209	1.33602	0.0839626		0.0524185	0.153775	2.06148	0.000141841
IL1RN	interleukin 1 receptor antagonist	3.94004	11.231	1.78095	8.05731e-05		5.72296	12.519	2.06122	2.10454e-11
HOTAIR	HOX transcript antisense RNA	0.0040291	0.0573059	1.20248	0.999875		0.00805499	0.165139	2.05856	0.000966773
MLPH	melanophilin	9.79392	14.7346	1.10276	0.687559		4.36605	11.3974	2.05855	8.90457e-08
SAMD4B	sterile alpha motif domain containing 4B	5.52689	7.80847	1.24794	0.135509		3.67105	8.34945	2.058	9.72431e-31
KRT17	keratin 17	0.395153	5.40424	2.0794	1.10205e-06		0.365884	2.89776	2.05749	0.00134517
RP11-474D1.3	0	0.31745	0.320409	0.996411	0.990427		0.0242641	0.459387	2.05723	0.000888139
CD44	CD44 molecule (Indian blood group)	20.9593	40.3855	1.29485	0.130917		13.7925	34.6214	2.05317	1.47536e-09
OLFM4	olfactomedin 4	681.414	1532.6	1.59918	0.00359242		633.63	1761.8	2.05038	2.30623e-05
TFAP2A	transcription factor AP-2 alpha	0.0896509	0.403592	1.56027	0.00788618		0.0574096	0.222655	2.05017	0.000983851
PART1	prostate androgen-regulated transcript 1 (non-protein coding)	0.193811	0.265403	1.15552	0.495952		0.116811	0.290411	2.04987	1.6373e-08
NAF1	nuclear assembly factor 1 ribonucleoprotein	2.22742	3.527	1.44495	0.00411726		1.33584	3.06979	2.0491	3.14243e-14
MARCKSL1	MARCKS like 1	27.5083	55.3634	1.43344	0.0227658		19.1571	45.8249	2.04863	2.76742e-11
MT1DP	metallothionein 1D, pseudogene	1.08855	2.4594	1.22018	0.339083		0.686682	2.14804	2.04777	7.0415e-05
ZYX	zyxin	13.0811	24.6637	1.45151	0.0133939		10.9418	25.2328	2.045	1.16342e-16
SHISA6	shisa family member 6	0.0924149	0.0634943	0.880052	0.547233		0.0269276	0.104573	2.04325	0.00116746
PPY	pancreatic polypeptide	0.57577	1.50336	1.26364	0.200415		0.0568522	1.27221	2.04309	0.000970443
FBXL13	F-box and leucine rich repeat protein 13	0.771827	0.905428	1.00389	0.99081		0.342743	0.896874	2.04282	5.0079e-06
SH3BP4	SH3 domain binding protein 4	13.6878	24.1841	1.44712	0.000718481		10.0187	23.9532	2.04089	7.97559e-15
ARHGDIA	Rho GDP dissociation inhibitor alpha	39.3564	76.5045	1.85449	5.14004e-13		37.2956	81.873	2.03858	1.36606e-24
SERPINA4	serpin family A member 4	4.15026	3.91715	0.986483	0.948602		0.100728	5.00303	2.03496	0.000757546
FOXD2-AS1	FOXD2 antisense RNA 1 (head to head)	1.06105	0.959376	1.06342	0.81823		0.296175	0.754944	2.03364	1.05648e-05
CCDC113	coiled-coil domain containing 113	0.536373	0.729048	1.0787	0.76633		0.271151	0.700454	2.03344	1.79753e-05
MARCH4	membrane associated ring-CH-type finger 4	0.233312	0.350878	1.13034	0.548511		0.10977	0.293875	2.03254	8.47029e-05
DSG3	desmoglein 3	8.44165	17.5125	1.35391	0.105793		4.68801	12.0995	2.03002	0.000210861
CXCL2	C-X-C motif chemokine ligand 2	0.585273	1.31631	1.20439	0.361286		0.459928	3.01369	2.0295	0.00164512
SLC4A11	solute carrier family 4 member 11	0.136455	0.315678	1.26355	0.232275		0.0882499	0.274702	2.02785	0.000771185
SCGB3A1	secretoglobin family 3A member 1	1.03799	1.187	1.02107	0.916735		0.0382645	1.06364	2.0266	0.001008
LGR5	leucine rich repeat containing G protein-coupled receptor 5	3.13236	7.92709	1.65365	0.000865991		2.23505	6.20892	2.02541	6.61834e-05
TTC40	#N/A	0.188457	0.355013	1.30088	0.175575		0.0735102	0.260729	2.02513	0.00066473
APOLD1	apolipoprotein L domain containing 1	2.96968	7.48529	1.63364	0.000204664		2.61039	7.15103	2.02433	1.7757e-05
SCAMP4	secretory carrier membrane protein 4	4.70844	7.63822	1.46426	0.00134816		3.74084	8.34302	2.02218	5.84653e-25
LIPM	lipase family member M	0.282376	0.636185	1.22961	0.295759		0.131195	0.413423	2.02197	0.000677823
UCP2	uncoupling protein 2	6.85088	10.5567	1.26504	0.0874575		5.44833	12.7979	2.01935	3.25642e-10
MUC6	mucin 6, oligomeric mucus/gel-forming	111.948	134.572	1.02732	0.900276		6.19876	221.205	2.01713	0.000940873
SLC9A4	solute carrier family 9 member A4	2.21503	2.031	0.979102	0.924067		0.0683451	2.3894	2.01695	0.000941108
KY	kyphoscoliosis peptidase	0.292668	0.559049	1.37309	0.0822526		0.185427	0.527468	2.01286	2.38327e-05
EGR2	early growth response 2	0.451025	0.531639	1.0838	0.751249		0.341359	1.34227	2.01179	0.00172217
SLC29A3	solute carrier family 29 member 3	1.68908	3.26047	1.50064	0.00123564		1.35637	3.47505	2.01029	1.99382e-09
SLC12A2	solute carrier family 12 member 2	77.6506	146.34	1.40989	0.0248943		46.7813	130.107	2.00812	9.34717e-05
USP54	ubiquitin specific peptidase 54	8.11049	11.0677	1.13946	0.532953		4.22402	10.3828	2.00498	7.02733e-09
GABRP	gamma-aminobutyric acid type A receptor pi subunit	4.29879	11.2837	1.50685	0.0161213		3.65831	11.133	2.00466	0.000172002
B3GAT1	beta-1,3-glucuronyltransferase 1	0.323707	0.426833	0.991173	0.979202		0.124296	0.320919	2.00365	4.74378e-05
LEF1	lymphoid enhancer binding factor 1	0.849459	1.67628	1.4721	0.00703157		0.691556	1.7941	2.00239	9.45747e-06
TRIM29	tripartite motif containing 29	0.206966	0.949455	1.41255	0.0394701		0.175076	0.876984	2.00077	0.00228811
SCG3	secretogranin III	1.45124	2.21717	1.15189	0.400222		0.814692	2.1274	2.00064	1.19044e-05
SLC5A8	solute carrier family 5 member 8	0.263707	0.121388	0.797449	0.211294		0.0625404	0.293309	1.99714	0.00229157
SLC9A1	solute carrier family 9 member A1	7.87271	9.77913	1.16624	0.409992		5.2562	11.9049	1.99694	1.96696e-13
ALDH3B2	aldehyde dehydrogenase 3 family member B2	0.0896362	0.0928031	0.994054	0.984912		0.0100314	0.137774	1.99582	0.00159002
PADI2	peptidyl arginine deiminase 2	24.7266	2.1614	0.676587	0.0202744		0.809373	1.99229	1.99417	4.74131e-10
TRH	thyrotropin releasing hormone	0.0415633	0.0290176	0.953475	0.999875		0.00317402	0.126739	1.99122	0.00117967
LINC00261	long intergenic non-protein coding RNA 261	12.1814	16.5838	1.09369	0.711096		4.58928	11.7777	1.98712	1.69544e-05
SDK2	sidekick cell adhesion molecule 2	0.300055	0.25469	0.88767	0.586145		0.124276	0.297977	1.98461	2.32277e-07
SLC22A3	solute carrier family 22 member 3	1.45182	2.75404	1.36266	0.0967007		0.783519	2.75806	1.98434	0.00196933
DAPL1	death associated protein like 1	0.719444	1.54921	1.5089	0.0123949		0.680113	1.7048	1.98408	0.000134671
FHL3	four and a half LIM domains 3	1.51451	2.4601	1.40687	0.0237514		1.06819	2.48196	1.98344	4.80142e-08
FUT9	fucosyltransferase 9	1.53673	1.31079	0.968013	0.866873		0.0564491	1.75962	1.98277	0.00123728
MT1G	metallothionein 1G	104.611	197.291	1.48469	0.00366991		112.27	249.74	1.98199	1.20463e-10
CA9	carbonic anhydrase 9	8.41971	20.1955	1.61715	0.00372302		9.19674	23.7285	1.98157	0.000111267
CD300LD	CD300 molecule like family member d	0.0610024	0.343951	1.20004	0.999875		0.0169084	0.352496	1.98098	0.00150301
RFX6	regulatory factor X6	2.127	3.3461	1.24626	0.195702		1.36453	3.20711	1.97974	5.25961e-08
KIAA1683	KIAA1683	0.813524	0.753636	0.996028	0.990427		0.436165	1.0102	1.97802	2.56964e-07
LRG1	leucine rich alpha-2-glycoprotein 1	5.70335	6.0078	0.971074	0.8923		3.23876	7.59474	1.97649	5.98883e-07
GPR37L1	G protein-coupled receptor 37 like 1	0.291795	0.282602	1.0314	0.915542		0.128692	0.337043	1.97506	0.000511016
NPAS2	neuronal PAS domain protein 2	5.85764	8.64625	1.32332	0.0451386		4.08193	8.74744	1.96922	1.98906e-21
DAG1	dystroglycan 1	11.5676	18.0022	1.33481	0.0323653		8.64965	19.1324	1.96864	9.2846e-20
LRRN1	leucine rich repeat neuronal 1	1.36398	1.9869	1.24809	0.206348		0.915344	2.40847	1.96772	4.92157e-06
LOC92249	#N/A	1.03437	1.49039	1.16355	0.405253		0.619606	1.40737	1.96748	1.44415e-08
C17orf97	chromosome 17 open reading frame 97	1.20606	2.1122	1.45127	0.00785942		0.862483	2.20656	1.96734	4.36369e-09
BCL3	B-cell CLL/lymphoma 3	5.94842	9.06499	1.38532	0.0240774		4.86586	11.1456	1.96581	1.80411e-10
TCF7	transcription factor 7 (T-cell specific, HMG-box)	4.21279	8.25805	1.57814	7.88417e-05		3.46373	7.8472	1.96234	2.68049e-17
NR4A1	nuclear receptor subfamily 4 group A member 1	4.68871	8.46821	1.20766	0.3718		3.0521	12.3598	1.95965	0.00290772
A4GNT	alpha-1,4-N-acetylglucosaminyltransferase	3.52757	4.16886	1.01391	0.946085		0.117721	7.0334	1.95905	0.00129545
FOXP4	forkhead box P4	3.12564	4.28101	1.16495	0.423525		2.11067	4.64977	1.95822	5.42028e-14
PHLDA1	pleckstrin homology like domain family A member 1	3.19085	8.62731	1.49464	0.0195158		2.21038	5.1508	1.9572	3.40033e-07
SEPN1	selenoprotein N, 1	7.2084	12.0089	1.36984	0.0149981		5.3577	11.9023	1.95659	4.82718e-24
EFNA5	ephrin A5	0.89773	0.918389	1.08032	0.723471		0.408559	1.08022	1.95656	5.68881e-05
BMP4	bone morphogenetic protein 4	7.10454	12.4644	1.36691	0.050461		5.61276	12.4798	1.95591	3.63734e-16
ZFP57	ZFP57 zinc finger protein	0.168377	2.04798	1.28748	0.0623828		0.0901984	0.596459	1.95326	0.00336506
RNF183	ring finger protein 183	0.339813	0.580887	1.17888	0.424617		0.202915	0.640223	1.9527	0.00166124
ARID1A	AT-rich interaction domain 1A	11.3266	13.8642	1.11946	0.477178		7.26413	15.6656	1.95037	7.19821e-21
SHISA9	shisa family member 9	0.0494333	0.0753644	1.09167	0.725602		0.0151446	0.0467333	1.95032	0.002404
PTPRU	protein tyrosine phosphatase, receptor type U	0.434363	0.340943	0.835737	0.399762		0.188354	0.451644	1.94918	2.557e-06
PTPRN2	protein tyrosine phosphatase, receptor type N2	6.21402	6.10055	0.92758	0.744339		3.1447	7.06627	1.94863	4.58425e-10
RARG	retinoic acid receptor gamma	1.69531	3.03492	1.23001	0.316733		1.0736	2.57533	1.94783	3.17126e-06
CXCL3	C-X-C motif chemokine ligand 3	0.567316	1.49712	1.22041	0.317104		0.436718	2.40522	1.94635	0.00351537
BCL9L	B-cell CLL/lymphoma 9-like	3.36431	4.8844	1.29335	0.0458453		2.56406	5.45457	1.94477	2.37702e-22
SLC26A7	solute carrier family 26 member 7	0.721037	0.648697	0.886455	0.550409		0.309314	0.821147	1.94346	0.000285166
PPDPF	pancreatic progenitor cell differentiation and proliferation factor	28.3199	46.4647	1.56033	5.16095e-05		25.1044	52.805	1.94303	9.26086e-20
C2CD4A	C2 calcium dependent domain containing 4A	0.603802	1.83505	1.36275	0.0969899		0.499046	1.50319	1.94232	0.000507628
APOD	apolipoprotein D	3.15304	5.6891	1.53031	0.00478752		2.48199	5.49428	1.94163	2.64306e-07
SCG5	secretogranin V	21.5895	24.5061	1.02421	0.934494		8.74421	23.3793	1.94127	0.000437802
SLCO2A1	solute carrier organic anion transporter family member 2A1	4.6662	5.2892	1.09151	0.686487		3.00737	6.56303	1.94078	1.20463e-10
FAM155A	family with sequence similarity 155 member A	0.360896	0.800199	1.25586	0.253863		0.280494	0.779846	1.93908	0.000456954
TTC39A	tetratricopeptide repeat domain 39A	9.14944	9.55817	1.10035	0.69051		4.07146	9.35586	1.93761	4.33143e-09
ARHGAP8	Rho GTPase activating protein 8	5.64736	8.13817	1.17286	0.459017		3.20239	7.77751	1.93737	2.62896e-05
CST1	cystatin SN	0.194764	0.299219	1.05104	0.816448		0.115288	0.476527	1.93725	0.0037985
TMPRSS5	transmembrane protease, serine 5	0.235622	0.445966	1.2352	0.299453		0.144172	0.411677	1.93616	0.00146951
CYP2B6	cytochrome P450 family 2 subfamily B member 6	2.2874	5.07095	1.36129	0.0608489		2.16343	5.9785	1.93427	1.12289e-07
LGALS9	galectin 9	14.2257	22.6852	1.47865	0.00183446		10.847	23.8144	1.93322	1.07811e-11
PATL1	PAT1 homolog 1, processing body mRNA decay factor	8.09106	13.8907	1.43759	0.00183446		6.25621	13.8675	1.93267	8.23779e-22
PROM1	prominin 1	19.8249	23.0878	1.03826	0.890842		9.03857	20.3826	1.92983	3.142e-08
ASCL2	achaete-scute family bHLH transcription factor 2	8.9926	17.2787	1.45131	0.0207881		6.18987	17.1924	1.92904	0.000801854
ABCA13	ATP binding cassette subfamily A member 13	0.410246	0.724546	1.44454	0.00983218		0.238822	0.635841	1.92756	5.16307e-05
LRRC17	leucine rich repeat containing 17	1.46504	1.76723	1.00613	0.986157		0.692161	1.88979	1.92652	0.000133337
IZUMO1	izumo sperm-egg fusion 1	0.18057	0.199551	1.04397	0.862394		0.0844958	0.369429	1.92343	0.00420116
CYP2E1	cytochrome P450 family 2 subfamily E member 1	0.715193	2.56975	1.2246	0.25983		0.300749	0.921535	1.92199	0.00164373
SLC25A23	solute carrier family 25 member 23	13.1203	20.0562	1.56874	7.24042e-05		10.6225	21.616	1.92135	1.78483e-14
FAM83H-AS1	FAM83H antisense RNA 1 (head to head)	1.16627	2.13071	1.21379	0.35423		0.712432	1.80506	1.92115	8.66524e-05
PCDHGB8P	protocadherin gamma subfamily B, 8 pseudogene	0.683833	0.604428	0.833086	0.321419		0.263959	0.685769	1.91946	0.000659231
SRCIN1	SRC kinase signaling inhibitor 1	0.147661	0.181182	1.08191	0.717551		0.0937813	0.22193	1.91916	5.37362e-05
RGS7	regulator of G-protein signaling 7	0.230215	0.4668	1.42845	0.0339007		0.144533	0.375726	1.91743	0.000770865
CBLL1	Cbl proto-oncogene like 1	6.69908	11.6397	1.66039	1.69217e-16		5.45599	11.849	1.9167	1.90309e-20
DNAH12	dynein axonemal heavy chain 12	0.0706146	0.120042	1.19939	0.362745		0.0403431	0.106319	1.91644	0.00107982
C15orf39	chromosome 15 open reading frame 39	4.9462	7.25079	1.40452	0.0036529		3.75748	7.83117	1.91607	2.19761e-36
DOK7	docking protein 7	0.238993	0.307229	1.04425	0.874329		0.076105	0.204846	1.91583	0.00122894
POGZ	pogo transposable element with ZNF domain	8.91708	12.3878	1.26913	0.00926941		5.87566	12.383	1.9149	1.03584e-15
SIM2	single-minded family bHLH transcription factor 2	0.319879	1.39069	1.4368	0.0413444		0.282885	0.822743	1.91356	0.00113664
EPHX3	epoxide hydrolase 3	0.119114	0.135636	1.03873	0.892933		0.0910646	0.266398	1.9124	0.0030237
C15orf54	chromosome 15 open reading frame 54	0.27882	0.427433	1.07937	0.765184		0.093368	0.521684	1.91006	0.00454928
EP300	E1A binding protein p300	15.8753	19.8625	1.16886	0.231589		10.6173	22.3497	1.9054	1.58351e-20
C1orf198	chromosome 1 open reading frame 198	6.6766	12.6195	1.58468	1.07344e-07		5.5253	11.6525	1.90481	1.44075e-20
UBLCP1	ubiquitin like domain containing CTD phosphatase 1	6.50689	12.2802	1.73259	5.30247e-20		5.26961	11.2307	1.90459	4.74411e-24
CYP4F8	cytochrome P450 family 4 subfamily F member 8	0.0190054	0.218933	1.59071	0.00161694		0.00931348	0.132698	1.90312	0.00310202
CNDP1	carnosine dipeptidase 1	6.10027	12.5574	1.26426	0.223135		4.90227	12.5796	1.90287	4.88581e-06
SRRM1	serine and arginine repetitive matrix 1	10.6008	16.3255	1.33694	0.00520819		7.59779	16.2221	1.90158	6.88148e-26
FAM167A	family with sequence similarity 167 member A	0.431984	0.681824	1.28778	0.0831557		0.268046	0.640898	1.90139	3.48855e-05
GPX2	glutathione peroxidase 2	48.7788	98.5868	1.32923	0.125542		35.5278	89.1777	1.90079	0.000125302
RAB3B	RAB3B, member RAS oncogene family	1.42218	1.19897	0.891886	0.604043		0.492643	1.1117	1.90016	3.21941e-06
MYRF	myelin regulatory factor	6.32253	10.8599	1.41409	0.010954		4.923	10.5121	1.89901	1.28042e-14
RPRD2	regulation of nuclear pre-mRNA domain containing 2	6.76008	9.75152	1.27306	0.0291908		4.67428	9.92684	1.89841	3.22339e-26
PARM1	prostate androgen-regulated mucin-like protein 1	21.9978	7.07539	0.770974	0.179856		3.44781	7.35055	1.89689	4.95407e-10
FBXL16	F-box and leucine rich repeat protein 16	0.407517	0.665446	1.37747	0.0286989		0.285225	0.644049	1.89524	2.64793e-06
CCL2	C-C motif chemokine ligand 2	7.54414	14.4539	1.4772	0.0101679		6.81865	15.2458	1.89428	1.09392e-06
GLB1L2	galactosidase beta 1 like 2	4.9178	8.90112	1.32225	0.112345		4.09749	8.87504	1.893	2.37327e-08
MUC7	mucin 7, secreted	0.0118123	0.0831738	1.38218	0.999875		0.0108965	0.0804626	1.89249	0.00457365
GABRA1	gamma-aminobutyric acid type A receptor alpha1 subunit	0.333519	0.344026	0.967966	0.911294		0.102819	0.2886	1.89205	0.00316462
ZDHHC1	zinc finger DHHC-type containing 1	1.64973	2.16382	1.11241	0.619904		1.0565	2.29605	1.89188	6.01132e-09
MPV17L	MPV17 mitochondrial inner membrane protein like	5.03376	8.4796	1.51973	0.0011985		4.48356	9.69248	1.89042	5.34297e-16
CNTN3	contactin 3	1.53543	0.595003	0.691558	0.0379836		0.352442	0.845646	1.88782	0.000586634
CACHD1	cache domain containing 1	2.52984	3.44891	1.18502	0.257557		1.7167	3.78084	1.88612	5.64185e-15
CYSTM1	cysteine rich transmembrane module containing 1	191.641	355.59	1.65316	2.36278e-07		182.54	389.59	1.88445	6.8496e-15
HCN4	hyperpolarization activated cyclic nucleotide gated potassium channel 4	0.449701	0.352601	0.867807	0.498573		0.242493	0.48661	1.88194	1.11223e-05
ANK1	ankyrin 1	0.399286	0.528643	1.11078	0.604151		0.20151	0.486663	1.88151	1.71472e-05
UBE2V1	ubiquitin conjugating enzyme E2 V1	8.54098	15.2848	1.65514	5.09619e-13		7.02516	14.6981	1.88142	3.83802e-33
FLJ23867	#N/A	8.89141	9.73653	1.03293	0.901994		5.27803	11.4497	1.88008	2.03326e-09
NYNRIN	NYN domain and retroviral integrase containing	3.64934	5.04032	1.14988	0.4013		2.28084	4.89964	1.87925	1.00703e-13
MMP19	matrix metallopeptidase 19	1.89865	3.27419	1.42863	0.0031905		1.57523	3.34573	1.87789	4.46534e-17
MANSC1	MANSC domain containing 1	11.7739	18.9453	1.41195	0.00136347		9.14243	19.3231	1.87756	3.72873e-32
TRIM58	tripartite motif containing 58	0.108184	0.0912187	0.91635	0.718356		0.0333115	0.0909294	1.8774	0.00359393
MBD6	methyl-CpG binding domain protein 6	5.00729	6.69365	1.19506	0.237073		3.47795	7.24007	1.87721	1.53884e-23
TANC2	tetratricopeptide repeat, ankyrin repeat and coiled-coil containing 2	1.47547	1.87683	1.05198	0.838021		0.855536	1.89256	1.877	3.12683e-06
REG3G	regenerating family member 3 gamma	0.688791	1.0452	1.25839	0.251731		0.512878	3.73444	1.87693	0.00610989
RUNX1	runt related transcription factor 1	3.48202	4.54841	1.12165	0.512266		2.24057	4.92845	1.87637	3.26361e-08
SEC14L5	SEC14 like lipid binding 5	0.326955	0.268165	0.877749	0.569997		0.144726	0.348406	1.87391	0.000383198
PAX6	paired box 6	1.06996	1.19624	1.02457	0.912961		0.573889	1.22364	1.87251	9.69145e-10
MAPK15	mitogen-activated protein kinase 15	0.391982	0.638331	1.26684	0.216268		0.319685	0.785696	1.87243	0.000304795
GATAD2B	GATA zinc finger domain containing 2B	4.39046	5.71465	1.10588	0.552827		2.75206	5.91598	1.8701	2.28963e-12
RIMBP2	RIMS binding protein 2	1.51988	1.95744	1.06493	0.7183		0.875429	1.93589	1.86664	1.43346e-06
SPATA18	spermatogenesis associated 18	2.26513	3.95007	1.24089	0.238245		1.41763	3.28946	1.86645	9.47095e-06
ARID5B	AT-rich interaction domain 5B	13.4285	19.3704	1.26149	0.0263522		9.58871	21.0585	1.86604	4.55014e-14
TMEM178B	transmembrane protein 178B	0.151085	0.173053	0.938056	0.794872		0.0781165	0.29432	1.8638	0.00630147
CCDC60	coiled-coil domain containing 60	0.275996	0.214014	0.940303	0.762005		0.022797	0.151381	1.86191	0.00584142
RAB3A	RAB3A, member RAS oncogene family	0.719062	1.07743	1.3462	0.0426522		0.517244	1.14668	1.86036	0.000103562
C7orf31	chromosome 7 open reading frame 31	1.98151	2.54302	1.17365	0.313881		1.15342	2.54334	1.85979	6.32449e-10
PLCD3	phospholipase C delta 3	9.31964	12.6024	1.16404	0.481319		4.38483	9.70594	1.85955	0.00025119
SST	somatostatin	68.3438	103.522	1.34048	0.100529		47.9606	98.4869	1.85943	3.48554e-09
TLL2	tolloid like 2	0.287544	0.276636	0.926547	0.753559		0.161699	0.377726	1.85909	3.33977e-05
SERTAD4-AS1	SERTAD4 antisense RNA 1	0.808321	1.34062	1.19805	0.395708		0.427666	1.06817	1.85792	0.00104941
DACT1	dishevelled binding antagonist of beta catenin 1	4.18438	7.94962	1.47776	0.002518		2.78237	7.4882	1.85779	0.00170667
DNASE2B	deoxyribonuclease II beta	0.131629	0.132937	0.989949	0.972653		0.0223402	0.139612	1.85748	0.00630755
LMLN	leishmanolysin like peptidase	0.800499	1.14423	1.21156	0.205351		0.49808	1.05504	1.85664	2.24222e-09
MCCC2	methylcrotonoyl-CoA carboxylase 2	15.4125	27.2927	1.51008	0.000102993		12.8966	26.4505	1.8566	1.99726e-18
LY6D	lymphocyte antigen 6 complex, locus D	0	0.077483	1.13281	0.999875		0.00559715	0.293458	1.8566	0.00310483
AC017060.1	0	0.697369	0.441027	0.929194	0.724171		0.117967	0.60922	1.85644	0.0068978
IAPP	islet amyloid polypeptide	0.161669	0.138649	0.939312	0.786377		0.0257419	0.218537	1.85554	0.00556891
ARHGEF38	Rho guanine nucleotide exchange factor 38	3.85751	4.9456	1.10259	0.646819		2.33887	5.18624	1.85452	2.34258e-07
CXCL5	C-X-C motif chemokine ligand 5	0.185811	1.27321	1.26805	0.116337		0.0493	1.1183	1.85443	0.00349058
KIAA2018	#N/A	7.7351	10.506	1.23503	0.0693468		5.18381	10.9862	1.85429	1.62608e-12
TMEM27	transmembrane protein 27	1.10353	1.04051	0.928825	0.774195		0.482009	1.31892	1.85425	0.00142687
MUC17	mucin 17, cell surface associated	40.8691	59.9166	1.2347	0.263687		37.5778	79.1306	1.85382	4.33317e-07
AC007740.1	0	0.133067	0.0741572	0.831821	0.344523		0.0451788	0.140963	1.85369	0.00558527
TRIM24	tripartite motif containing 24	13.2028	23.806	1.41366	0.00670914		10.4181	22.8157	1.85282	3.09865e-12
GPR115	#N/A	0.415957	0.195637	0.915932	0.681832		0.0153064	0.118158	1.85261	0.00625549
MAPRE2	microtubule associated protein RP/EB family member 2	6.6349	9.9729	1.35524	0.00165569		4.74953	9.59142	1.8515	5.45113e-28
PHF12	PHD finger protein 12	5.5381	7.62971	1.26881	0.0159405		3.96677	8.09109	1.85086	7.1293e-28
SOX4	SRY-box 4	13.0405	21.9182	1.33744	0.0222682		9.29648	20.6036	1.85011	1.06674e-07
FRMPD2	FERM and PDZ domain containing 2	0.0364467	0.0290257	0.912699	0.999875		0.00451845	0.0469062	1.84866	0.0048457
CACNG4	calcium voltage-gated channel auxiliary subunit gamma 4	0.107564	0.181621	1.22478	0.327067		0.071577	0.202599	1.84664	0.00498175
ATP4B	ATPase H+/K+ transporting beta subunit	0.628729	0.295101	0.865314	0.999875		0.0760452	0.340394	1.84443	0.00773816
SYT2	synaptotagmin 2	0.756814	0.645439	0.873492	0.455793		0.375631	0.791376	1.84416	6.43398e-12
MAPK1IP1L	mitogen-activated protein kinase 1 interacting protein 1-like	11.8621	19.4903	1.50632	7.22527e-07		9.44217	19.4496	1.84256	7.20914e-31
HNF1B	HNF1 homeobox B	5.34896	6.13014	1.08637	0.70301		3.17448	6.68971	1.84225	1.79109e-09
SPTBN2	spectrin beta, non-erythrocytic 2	0.972469	1.98023	1.34449	0.106457		0.678819	1.52329	1.84179	3.45818e-05
TSPAN1	tetraspanin 1	118.472	48.7167	0.866279	0.522941		23.0795	49.2421	1.84161	4.38298e-07
ALPK3	alpha kinase 3	0.405169	0.519022	1.19363	0.12096		0.267902	0.544328	1.84108	1.05054e-10
TEKT2	tektin 2	0.166461	0.148194	0.920724	0.734813		0.0549219	0.19523	1.84096	0.00785529
HCAR1	hydroxycarboxylic acid receptor 1	0.128852	0.172226	1.08101	0.759492		0.0478314	0.146349	1.83979	0.00542286
IER3	immediate early response 3	10.683	20.6989	1.32449	0.117626		8.03379	19.1604	1.83974	4.05497e-05
CHST9	carbohydrate sulfotransferase 9	0.468181	0.554855	1.11367	0.618301		0.295719	0.676372	1.83889	0.000721988
MYOF	myoferlin	10.0682	13.5544	1.07499	0.778976		4.87506	12.1314	1.83786	0.000269427
COL11A2	collagen type XI alpha 2	0.268059	0.489435	1.35552	0.0881796		0.184231	0.41886	1.83741	5.7524e-06
MLXIP	MLX interacting protein	11.2675	13.7981	1.08248	0.736298		6.98334	14.6453	1.83724	2.00206e-12
PAH	phenylalanine hydroxylase	0.21958	0.31875	1.01466	0.963345		0.0971909	0.417676	1.83644	0.00682136
KRTAP5-1	keratin associated protein 5-1	0.462883	0.462841	0.998605	0.99713		0.185407	0.513152	1.83623	0.0043489
NEUROD2	neuronal differentiation 2	0.0620981	0.0738796	1.04667	0.865294		0.0251775	0.092807	1.83549	0.00833921
ALG1L	ALG1, chitobiosyldiphosphodolichol beta-mannosyltransferase-like	0.269513	0.429871	1.14387	0.553692		0.155273	0.441191	1.8353	0.00541652
MMP12	matrix metallopeptidase 12	3.65267	4.25214	1.08167	0.757342		1.74784	5.36356	1.83394	0.00602144
PCLO	piccolo presynaptic cytomatrix protein	1.59774	1.83261	1.0353	0.875353		0.975857	2.11248	1.8335	6.29519e-09
MSMB	microseminoprotein, beta-	14.4676	12.6312	1.0063	0.985329		7.13676	15.2919	1.83312	0.000450488
HCFC1	host cell factor C1	8.01423	9.98092	1.14276	0.424691		5.47317	10.99	1.83283	2.53908e-21
SLC38A4	solute carrier family 38 member 4	1.35852	1.49963	0.975036	0.930573		0.471852	1.08484	1.8325	3.39937e-05
VSTM2L	V-set and transmembrane domain containing 2 like	0.84633	1.39115	1.20083	0.374562		0.553259	1.41661	1.83197	0.00130224
SMAGP	small cell adhesion glycoprotein	17.2449	25.0687	1.26549	0.171282		11.0468	24.6453	1.82949	3.51976e-07
NMUR2	neuromedin U receptor 2	0.135686	2.74547	1.83733	4.71531e-05		0.0612246	1.9557	1.82845	0.0037898
CNNM1	cyclin and CBS domain divalent metal cation transport mediator 1	0.336655	0.418194	1.19551	0.299797		0.244887	0.503681	1.82739	3.40428e-06
IQSEC1	IQ motif and Sec7 domain 1	4.30068	5.32767	1.11844	0.434363		2.74654	5.37504	1.82694	5.0596e-16
SRPRA	SRP receptor alpha subunit	29.6739	50.5845	1.66416	9.75941e-22		24.7804	48.5121	1.82691	1.06311e-38
NBEAL2	neurobeachin like 2	8.3519	14.2135	1.24372	0.214057		6.15701	12.8906	1.8269	2.24308e-08
PAX9	paired box 9	0.0320434	0.118995	1.3102	0.112345		0.0166771	0.119798	1.82664	0.00770201
MRAP2	melanocortin 2 receptor accessory protein 2	3.97237	7.02663	1.35544	0.0372548		3.11815	7.17689	1.8263	1.14632e-05
ADORA2B	adenosine A2b receptor	1.57562	1.78101	1.08844	0.727502		0.433695	1.151	1.82601	0.00374907
KCNK16	potassium two pore domain channel subfamily K member 16	1.60466	2.17189	1.17845	0.406423		0.828038	2.04819	1.82531	0.00106038
SHROOM4	shroom family member 4	1.49361	2.17553	1.14652	0.413127		0.939646	2.01255	1.82447	7.12059e-10
ALOX12B	arachidonate 12-lipoxygenase, 12R type	0.395716	0.375545	0.951258	0.85686		0.169815	0.378779	1.82426	0.00154982
CTDNEP1	CTD nuclear envelope phosphatase 1	11.3635	18.2941	1.38111	0.0123319		8.3264	16.508	1.82359	2.41983e-15
IGFL2	IGF like family member 2	0.0586165	0.335551	1.17222	0.260625		0.010982	0.190166	1.82345	0.00494837
CREB5	cAMP responsive element binding protein 5	0.208919	0.29463	1.14971	0.516021		0.141341	0.345368	1.82338	0.00065837
ERV3-1	endogenous retrovirus group 3 member 1	3.00836	4.3051	1.15327	0.395708		1.87708	4.42437	1.82322	1.14426e-09
PACSIN1	protein kinase C and casein kinase substrate in neurons 1	0.144633	0.115551	0.8604	0.499112		0.0661293	0.152997	1.82296	0.00163667
LINC00668	long intergenic non-protein coding RNA 668	1.50103	8.86814	1.47604	0.014233		2.05211	7.15464	1.81997	0.00833123
MYC	v-myc avian myelocytomatosis viral oncogene homolog	16.1048	27.2435	1.37193	0.0204983		12.8247	27.0889	1.81957	2.81005e-09
E2F8	E2F transcription factor 8	2.34077	3.45352	1.2419	0.196755		2.18314	5.11587	1.81943	3.08904e-05
C9orf152	chromosome 9 open reading frame 152	11.0233	14.0088	1.18301	0.373762		5.73698	12.5029	1.81937	2.13773e-08
LINC00443	long intergenic non-protein coding RNA 443	0.00978017	0.0810917	1.13235	0.999875		0.0108155	0.198421	1.81848	0.00517944
ZNF462	zinc finger protein 462	4.01835	5.02818	1.08639	0.706558		2.169	4.67131	1.81694	1.13872e-09
ENAM	enamelin	0.410074	0.436427	1.034	0.899753		0.26244	0.576448	1.81491	3.1393e-07
RABL5	#N/A	1.83937	2.62025	1.19817	0.287965		1.32038	2.70629	1.81382	2.95121e-09
CHST4	carbohydrate sulfotransferase 4	0.165394	0.461227	1.16063	0.452801		0.0572628	0.258994	1.81357	0.00995962
PRR12	proline rich 12	2.37514	2.61314	1.00788	0.977174		1.4708	2.94857	1.81318	9.12703e-13
LILRA1	leukocyte immunoglobulin like receptor A1	0.162953	0.284895	1.55186	0.00352253		0.112491	0.259438	1.81292	0.00283328
ATN1	atrophin 1	5.27335	6.54006	1.0769	0.709783		3.39592	6.75884	1.81291	7.63362e-16
WSCD2	WSC domain containing 2	0.146034	0.204141	1.12312	0.617587		0.0797449	0.230093	1.81017	0.00498102
EDAR	ectodysplasin A receptor	1.14495	1.6582	1.13918	0.486121		0.827492	1.86971	1.81002	1.12434e-06
NACC1	nucleus accumbens associated 1	6.99994	10.8134	1.43691	0.00157434		5.80601	11.3044	1.80992	1.44152e-16
ISL1	ISL LIM homeobox 1	1.80701	2.23739	1.11251	0.603464		1.19334	2.41812	1.80717	7.81529e-06
CLIP3	CAP-Gly domain containing linker protein 3	0.684846	1.07009	1.33736	0.0471868		0.508878	1.01148	1.80623	2.40348e-07
SVOP	SV2 related protein	0.460535	0.502161	0.990409	0.97362		0.242013	0.550529	1.80538	0.000934539
PROSER1	proline and serine rich 1	4.68873	6.18	1.15883	0.349934		2.90105	5.96239	1.80523	4.11431e-08
NFIA	nuclear factor I A	8.95177	12.36	1.20295	0.0635907		5.89353	12.0345	1.80411	1.87594e-13
ZFP36	ZFP36 ring finger protein	27.1592	35.9481	1.25685	0.113426		25.0086	57.5148	1.80341	0.000477174
SLC30A2	solute carrier family 30 member 2	1.53579	1.99155	1.12744	0.601192		0.605795	2.12843	1.80305	0.00971923
ALDH4A1	aldehyde dehydrogenase 4 family member A1	0.910093	1.54111	1.20305	0.378412		0.697078	1.51975	1.80246	0.00026701
INSM1	INSM transcriptional repressor 1	1.93028	2.64894	1.15352	0.45659		1.35145	2.69968	1.80082	6.93717e-08
CELSR3	cadherin EGF LAG seven-pass G-type receptor 3	0.450429	0.817242	1.17738	0.453156		0.275174	0.618052	1.80042	5.77137e-05
ROS1	ROS proto-oncogene 1, receptor tyrosine kinase	0.365163	0.083502	0.744392	0.0897816		0.0316133	0.115809	1.79951	0.010534
FAM227A	family with sequence similarity 227 member A	0.123865	0.15262	1.04294	0.87792		0.0556092	0.13541	1.79846	0.00232702
FEV	FEV, ETS transcription factor	1.67131	2.69541	1.29945	0.0995932		1.11384	2.33196	1.79814	1.75076e-05
LATS1	large tumor suppressor kinase 1	7.90117	11.2001	1.36932	2.02896e-05		5.70366	11.2872	1.79772	4.47157e-20
FXYD3	FXYD domain containing ion transport regulator 3	59.958	34.9415	0.988101	0.96967		16.9276	35.777	1.79694	0.000632216
VWA5B2	von Willebrand factor A domain containing 5B2	1.42976	1.71834	1.11922	0.542642		0.877072	1.82296	1.79691	1.11404e-05
PKDCC	protein kinase domain containing, cytoplasmic	20.8911	37.7936	1.32509	0.109038		14.093	29.5997	1.79404	4.20756e-07
MLK7-AS1	MLK7 antisense RNA 1	2.4826	5.43669	1.26608	0.221706		2.26995	5.28355	1.79226	0.000111345
SOCS3	suppressor of cytokine signaling 3	3.38718	3.9777	1.05428	0.839045		3.09451	11.5843	1.79092	0.0101083
EVA1A	eva-1 homolog A, regulator of programmed cell death	0.612205	1.09642	1.42318	0.0367797		0.490492	1.0762	1.78983	0.000116741
ZNF503	zinc finger protein 503	5.87758	7.49785	1.16033	0.49013		4.04658	8.30825	1.78841	1.60443e-09
FOXRED2	FAD dependent oxidoreductase domain containing 2	1.82095	2.43361	1.23453	0.113435		1.42923	2.84616	1.78821	3.63734e-16
CYP27B1	cytochrome P450 family 27 subfamily B member 1	0.461343	0.867919	1.38478	0.0394701		0.345504	0.741832	1.78767	0.000237073
LOC284837	#N/A	0.225879	0.36791	1.16567	0.475074		0.134229	0.296799	1.7871	0.000430676
FRMPD1	FERM and PDZ domain containing 1	0.117178	0.172131	1.13789	0.569464		0.0491717	0.135203	1.78689	0.00784656
KCTD1	potassium channel tetramerization domain containing 1	2.36126	3.00272	1.08428	0.641683		1.55799	3.22018	1.78645	1.31498e-07
BAAT	bile acid-CoA:amino acid N-acyltransferase	0.0376141	0.0888907	1.25951	0.214196		0.0249625	0.0822695	1.78511	0.0116634
ASPHD1	aspartate beta-hydroxylase domain containing 1	1.09593	2.41467	1.55241	0.00627504		0.623526	1.707	1.78411	0.00520974
SMOC2	SPARC related modular calcium binding 2	10.0381	14.7648	1.1468	0.532953		6.60334	12.7797	1.78407	4.31188e-10
LHFPL3	lipoma HMGIC fusion partner-like 3	1.43828	1.43162	0.975268	0.914149		0.956486	2.04797	1.78397	1.37251e-05
NEK10	NIMA related kinase 10	3.4865	2.96592	0.945106	0.833543		2.01742	4.20662	1.78114	0.000438055
C16orf45	chromosome 16 open reading frame 45	4.52295	6.05834	1.27536	0.0614556		3.42898	6.9136	1.78074	5.35233e-09
CDK5R2	cyclin dependent kinase 5 regulatory subunit 2	0.0990272	0.183678	1.31565	0.153432		0.0340821	0.114754	1.77998	0.0125389
TIMP1	TIMP metallopeptidase inhibitor 1	28.3185	47.4473	1.28588	0.155259		17.9772	37.3006	1.77934	1.05181e-08
PLXNB3	plexin B3	0.285203	0.375151	1.14145	0.539112		0.154745	0.317937	1.7789	9.29604e-05
RNF44	ring finger protein 44	4.73894	6.38944	1.23275	0.154255		3.37338	6.53939	1.77828	1.02916e-14
LINC00960	long intergenic non-protein coding RNA 960	0.513313	1.17024	1.31614	0.149486		0.432832	0.874831	1.77563	0.00178397
TBL1Y	transducin (beta)-like 1, Y-linked	0.0836982	0.102015	1.07325	0.769773		0.0165453	0.0828602	1.7743	0.0123101
HCN1	hyperpolarization activated cyclic nucleotide gated potassium channel 1	0.0358254	0.0745541	1.22946	0.30263		0.0178677	0.140449	1.77357	0.0101793
HEYL	hes related family bHLH transcription factor with YRPW motif-like	0.617213	0.948849	1.34654	0.0359032		0.50755	1.02482	1.77354	8.21115e-09
CASR	calcium sensing receptor	0.702206	0.831055	1.05869	0.788638		0.41806	0.88621	1.77327	0.00042154
SEPT3	septin 3	0.0959056	0.227886	1.57055	0.00528071		0.0923782	0.218021	1.77215	0.00377308
MGC27345	#N/A	0.972053	1.51855	1.34215	0.00592723		0.69795	1.4026	1.7715	1.87948e-14
MEF2D	myocyte enhancer factor 2D	6.21461	7.17439	1.13515	0.404522		4.04597	7.70914	1.77147	1.98586e-18
SBK1	SH3 domain binding kinase 1	0.109314	0.152707	1.14977	0.530672		0.0832415	0.178584	1.77133	0.0021171
SP5	Sp5 transcription factor	1.36174	2.10533	1.27478	0.210233		0.935921	1.99644	1.77117	0.000109631
BTBD16	BTB domain containing 16	0.103334	0.379533	1.27617	0.167672		0.0609428	0.212675	1.77083	0.0135698
SUCNR1	succinate receptor 1	1.70405	1.94252	1.05302	0.85095		0.806136	1.81134	1.77063	0.000981839
CCKAR	cholecystokinin A receptor	2.23756	3.09619	1.02821	0.895409		0.101165	3.40529	1.77056	0.00569287
LAMP3	lysosomal associated membrane protein 3	1.04228	1.4878	1.45719	0.00142907		0.814287	1.70448	1.77052	6.18242e-07
RMST	rhabdomyosarcoma 2 associated transcript (non-protein coding)	1.79273	1.44308	0.92531	0.761288		0.542724	1.30746	1.77025	0.00310939
DUSP7	dual specificity phosphatase 7	1.91645	2.97684	1.38952	0.00785942		1.42363	2.75598	1.77012	4.86182e-15
MOGAT1	monoacylglycerol O-acyltransferase 1	0.142763	0.128672	0.959479	0.999875		0.0398005	0.188377	1.76996	0.0127427
KCTD14	potassium channel tetramerization domain containing 14	4.20471	8.12684	1.50719	0.00170024		3.09644	6.3616	1.76981	6.49265e-09
CTTNBP2	cortactin binding protein 2	1.93304	2.44399	1.14392	0.285741		1.36063	2.65927	1.76969	2.5201e-19
MRPL4	mitochondrial ribosomal protein L4	6.79797	12.7744	1.68117	9.88486e-11		6.74802	13.0118	1.76954	1.78409e-11
MECOM	MDS1 and EVI1 complex locus	20.1542	31.8247	1.27611	0.0735198		14.1587	29.334	1.76906	8.35336e-08
FEZF1-AS1	FEZF1 antisense RNA 1	0	0.594539	1.06296	0.464058		0	0.311099	1.76855	0.00469841
ANKRD30B	ankyrin repeat domain 30B	0.119197	0.0715322	0.733023	0.0935219		0.0301574	0.0818733	1.76725	0.0111368
CLCF1	cardiotrophin-like cytokine factor 1	0.700013	1.17051	1.14373	0.556504		0.416256	0.899585	1.7671	0.00025119
PDIA2	protein disulfide isomerase family A member 2	13.9935	18.0222	1.13857	0.567012		5.67093	12.4576	1.76667	0.00121363
TRPM2-AS	TRPM2 antisense RNA	0.176894	0.708462	1.32348	0.0911511		0.0688362	0.297735	1.76632	0.0136915
EGFR	epidermal growth factor receptor	8.37879	9.65345	1.10125	0.608149		5.00539	9.79223	1.76619	2.02444e-19
RAB15	RAB15, member RAS oncogene family	11.4882	15.4627	1.29094	0.0134099		7.17994	14.5626	1.76573	1.00903e-11
TCF7L2	transcription factor 7 like 2	10.2222	10.3293	1.0184	0.934134		6.06251	11.9317	1.76522	7.40032e-12
PAX4	paired box 4	0.351573	0.537469	1.10126	0.691765		0.280579	0.627368	1.76519	0.00182906
ELK3	ELK3, ETS transcription factor	4.17261	5.08047	1.10695	0.43723		2.92276	5.7744	1.76491	1.96431e-13
PPRC1	peroxisome proliferator-activated receptor gamma, coactivator-related 1	3.70164	6.07525	1.3591	0.0324777		2.763	5.43191	1.76453	9.06588e-14
HIVEP3	human immunodeficiency virus type I enhancer binding protein 3	0.377095	0.37207	0.951081	0.845018		0.201251	0.392092	1.76408	1.01188e-07
MGC45800	#N/A	1.14159	1.41282	1.14829	0.510304		0.577697	1.28793	1.76372	0.00600152
BGN	biglycan	2.24075	2.63063	1.08361	0.723418		1.718	3.60629	1.76372	9.52823e-09
GAST	gastrin	77.2112	182.211	1.2597	0.243434		21.5519	89.6962	1.76294	0.0143319
SAMD5	sterile alpha motif domain containing 5	4.24014	9.17143	1.31663	0.147893		2.89495	7.02828	1.76247	0.00303727
PGR	progesterone receptor	0.435526	0.445575	0.94501	0.833792		0.230938	0.487921	1.76183	6.51683e-05
LRRC8E	leucine rich repeat containing 8 family member E	0.728178	1.25481	1.21496	0.327749		0.500546	1.12436	1.75977	0.000313423
ONECUT3	one cut homeobox 3	0.239866	0.624128	1.2428	0.236168		0.17319	0.540024	1.75965	0.0122743
CLMN	calmin (calponin-like, transmembrane)	9.01771	7.18209	0.947922	0.832693		3.18644	6.43012	1.75942	2.64714e-09
LOC254896	#N/A	0.37702	0.676586	1.27431	0.214878		0.263616	0.680474	1.75936	0.00629669
TLE1	transducin like enhancer of split 1	3.62857	5.32331	1.13042	0.586145		1.99782	4.27713	1.75925	2.64891e-05
KMT2A	lysine methyltransferase 2A	9.91423	12.0419	1.1045	0.378905		6.55616	12.9133	1.75834	1.47464e-14
EFCAB14	EF-hand calcium binding domain 14	34.6578	52.0883	1.40618	3.3591e-05		26.1999	51.0515	1.75805	2.37294e-26
BRD7P3	#N/A	0.2907	0.257062	0.913559	0.698053		0.1456	0.330449	1.75735	0.00426797
PLAGL2	PLAG1 like zinc finger 2	3.65554	5.24627	1.26253	0.12096		2.93297	5.65772	1.75675	4.34462e-07
REC8	REC8 meiotic recombination protein	3.38872	7.88626	1.42685	0.0437054		2.94076	6.92961	1.75649	0.00340832
PROSER2	proline and serine rich 2	0.475873	0.565346	1.05163	0.856116		0.245873	0.530797	1.75625	0.000592487
ZNF774	zinc finger protein 774	2.85237	3.03382	0.995281	0.988127		1.35913	2.87696	1.75493	4.21495e-05
GDPD5	glycerophosphodiester phosphodiesterase domain containing 5	1.16294	1.75518	1.32962	0.0607364		0.947518	1.86824	1.75457	9.72943e-10
NUP214	nucleoporin 214	7.13208	9.07219	1.14626	0.294232		4.73521	9.2163	1.75389	1.09387e-19
SLC16A8	solute carrier family 16 member 8	0.410733	0.477644	0.98809	0.969816		0.264923	0.579026	1.75374	0.00208594
PSME3	proteasome activator subunit 3	10.7527	18.6596	1.52576	2.57014e-05		9.05163	17.2908	1.75362	1.70844e-21
STS	steroid sulfatase (microsomal), isozyme S	2.57248	3.07087	1.12773	0.525095		1.65748	3.38561	1.75229	3.61475e-08
TMEM198B	transmembrane protein 198B (pseudogene)	3.33043	4.94782	1.23794	0.0990495		2.63214	5.13648	1.74945	3.33247e-10
RP11-234B24.2	0	1.78464	2.36642	1.20967	0.352486		1.10963	2.23853	1.74942	4.18645e-06
TOX3	TOX high mobility group box family member 3	6.83712	7.24569	1.0247	0.901994		4.22498	8.36337	1.74938	2.56334e-21
GSDMA	gasdermin A	0.432648	1.09876	1.46956	0.0277096		0.367063	0.79765	1.74828	0.000502655
ZNF703	zinc finger protein 703	3.70126	5.74355	1.24217	0.278536		2.24554	4.47493	1.74801	2.2563e-05
PRSS33	protease, serine 33	0.225404	0.54812	1.50027	0.0158813		0.1171	0.299207	1.74767	0.010661
PYCR1	pyrroline-5-carboxylate reductase 1	8.47783	12.8113	1.22565	0.2699		5.61674	11.025	1.74722	8.41889e-07
ELK4	ELK4, ETS transcription factor	6.66937	10.0572	1.39197	1.41601e-06		5.04169	9.67281	1.74629	2.39936e-14
GSK3A	glycogen synthase kinase 3 alpha	10.6153	18.4569	1.68821	5.52287e-13		10.7501	20.1635	1.74626	1.70844e-21
FIRRE	firre intergenic repeating RNA element	0.343109	0.652428	1.18544	0.999875		0.175084	0.421342	1.74624	0.0049095
DAGLA	diacylglycerol lipase alpha	1.14966	1.4052	1.15178	0.495212		0.706737	1.37921	1.746	1.95813e-08
SPATA2	spermatogenesis associated 2	3.79896	5.71681	1.43222	0.00124867		3.06178	5.79637	1.74576	2.54286e-21
LEFTY1	left-right determination factor 1	3.76375	0.714375	0.79119	0.999875		0.164608	0.686242	1.74549	0.0161528
APOOL	apolipoprotein O like	3.74632	5.55372	1.42508	4.71531e-05		2.85241	5.60394	1.74437	1.37632e-09
SLC6A14	solute carrier family 6 member 14	0.250109	1.00054	1.39243	0.0641552		0.312436	1.06438	1.74216	0.0130601
RARB	retinoic acid receptor beta	2.90433	2.85413	0.990223	0.972238		2.06562	4.11267	1.74142	1.03208e-05
WNK4	WNK lysine deficient protein kinase 4	2.43713	1.93939	0.946025	0.83641		0.837274	1.70395	1.74134	1.23976e-05
NR4A3	nuclear receptor subfamily 4 group A member 3	0.250788	0.380361	1.22522	0.319211		0.159267	0.405466	1.74063	0.00794748
DGKB	diacylglycerol kinase beta	0.0495406	0.0764941	1.06274	0.81143		0.0143431	0.054658	1.74032	0.017231
MIR7-3HG	MIR7-3 host gene	0.885009	1.30551	1.21353	0.306318		0.527485	1.32463	1.73897	0.00928656
CYR61	cysteine rich angiogenic inducer 61	1.72185	2.18977	1.05923	0.830124		1.04553	3.74288	1.73863	0.0175213
SH3PXD2A-AS1	SH3PXD2A antisense RNA 1	0.794087	0.661157	0.94698	0.831248		0.161012	0.432859	1.73829	0.0107714
PGM2L1	phosphoglucomutase 2-like 1	2.27781	3.41207	1.17783	0.389854		1.51699	3.36917	1.73682	1.86824e-05
SHANK2-AS1	SHANK2 antisense RNA 1	0.338715	0.251495	0.870836	0.542119		0.117107	0.279076	1.73479	0.00980657
NOL4L	nucleolar protein 4 like	10.9889	13.9061	1.27972	0.0397814		8.34147	15.6642	1.73439	4.13208e-22
ROR1	receptor tyrosine kinase-like orphan receptor 1	1.98012	2.86138	1.24099	0.141848		1.41338	2.73837	1.73364	7.84457e-09
PYY2	peptide YY, 2 (pseudogene)	0.313123	0.428743	1.08246	0.755956		0.115646	0.328987	1.73308	0.0163219
FAM222A	family with sequence similarity 222 member A	3.96042	6.06648	1.45673	1.88351e-05		3.59816	6.99837	1.73217	4.69051e-09
UCA1	Urothelial cancer associated 1 conserved region	0.509912	0.97656	1.2609	0.242574		0.420183	0.95275	1.73133	0.00152404
CHDH	choline dehydrogenase	10.7824	15.7559	1.22668	0.178657		6.82664	13.6223	1.73116	7.19652e-07
SATB2	SATB homeobox 2	7.25136	1.49091	0.782569	0.193807		0.58585	1.20103	1.73056	1.02565e-05
ZFPM2	zinc finger protein, FOG family member 2	0.454977	0.484242	0.976342	0.932611		0.25896	0.496836	1.7305	1.50849e-05
NPIPB5	nuclear pore complex interacting protein family member B5	0.113035	0.176247	1.23642	0.283441		0.066691	0.159237	1.73	0.0104021
VAC14	Vac14, PIKFYVE complex component	7.33393	11.0379	1.42024	0.000123194		6.03051	11.2506	1.72947	3.34715e-25
PHACTR4	phosphatase and actin regulator 4	6.35186	8.39247	1.20976	0.0921449		4.50017	8.61095	1.72874	1.80432e-28
ZNF280B	zinc finger protein 280B	0.305027	0.334553	1.0448	0.837779		0.16871	0.333238	1.72833	0.000319223
ZFP69B	ZFP69 zinc finger protein B	1.26854	1.96417	1.23298	0.154901		0.775628	1.53038	1.72828	4.22179e-05
ARHGEF38-IT1	ARHGEF38 intronic transcript 1	0.971385	1.09423	1.01849	0.953296		0.341598	1.03693	1.72823	0.0176664
CNTNAP2	contactin associated protein-like 2	0.630199	1.07967	1.22002	0.336292		0.3636	0.794143	1.72752	0.00164512
ZNRF3	zinc and ring finger 3	3.02633	5.7483	1.39875	0.029447		2.23307	4.5802	1.7273	1.0937e-05
TSHZ2	teashirt zinc finger homeobox 2	1.77585	2.22426	1.02805	0.891409		1.07064	2.23789	1.72693	2.41919e-07
ETV6	ETS variant 6	8.80921	11.045	1.11914	0.517265		5.60719	11.0088	1.72672	5.18066e-13
PVT1	Pvt1 oncogene (non-protein coding)	1.10762	2.15916	1.26651	0.214626		0.775201	1.69554	1.72574	0.0022594
FOS	Fos proto-oncogene, AP-1 transcription factor subunit	71.7004	72.0557	0.976	0.934555		55.7239	204.328	1.72553	0.0193663
GPR19	G protein-coupled receptor 19	0.277999	0.275971	0.985423	0.963225		0.146933	0.331049	1.72532	0.00620832
CCND2	cyclin D2	76.0058	124.898	1.38512	0.00317959		56.3001	118.203	1.72509	8.19526e-07
PLP2	proteolipid protein 2	35.6536	70.4548	1.59717	3.53619e-05		33.7489	67.2391	1.72406	1.88903e-07
RP5-1159O4.2	0	0.726374	0.972792	1.1164	0.617539		0.537575	1.06021	1.72325	4.22339e-05
TMEM189-UBE2V1	TMEM189-UBE2V1 readthrough	14.5122	24.7691	1.58263	5.02756e-11		12.6728	23.9572	1.72215	7.31431e-29
SYT7	synaptotagmin 7	1.3684	1.19903	0.973068	0.922469		0.62585	1.21219	1.72207	3.60975e-09
BCOR	BCL6 corepressor	8.03806	9.30708	1.09318	0.341561		5.5447	10.5463	1.72196	5.89953e-24
SDC3	syndecan 3	4.98025	7.4343	1.3138	0.0396652		4.09796	7.70927	1.72143	8.25058e-13
EHD2	EH domain containing 2	2.85475	3.09609	1.00791	0.979461		1.93047	3.57036	1.72116	4.17968e-10
UBQLNL	ubiquilin-like	0.187583	0.138355	0.860755	0.502658		0.0469715	0.13326	1.7206	0.01821
TNFRSF10C	tumor necrosis factor receptor superfamily member 10c	0.826719	1.39934	1.25797	0.24719		0.550848	1.21762	1.71993	0.00210799
TP63	tumor protein p63	0.0559329	0.0565426	1.0195	0.950022		0.0244169	0.0605185	1.71981	0.0141631
MOSPD3	motile sperm domain containing 3	2.0817	3.0294	1.29702	0.0494436		1.74028	3.38843	1.71959	2.5402e-07
FOSB	FosB proto-oncogene, AP-1 transcription factor subunit	1.12036	2.86958	1.09056	0.681311		0.3727	10.4563	1.71948	0.00858621
COL1A1	collagen type I alpha 1	10.9	11.9088	0.99428	0.985578		7.07495	13.8131	1.71943	1.40794e-07
CACNB4	calcium voltage-gated channel auxiliary subunit beta 4	0.210267	0.283338	1.10282	0.688825		0.114028	0.241024	1.71815	0.000891129
FAIM2	Fas apoptotic inhibitory molecule 2	0.237672	0.329665	1.08017	0.760014		0.138524	0.289678	1.71738	0.0036424
DUSP4	dual specificity phosphatase 4	1.05336	4.04192	1.50866	0.0178635		1.21997	2.84902	1.71725	0.00404608
ADAMTS9	ADAM metallopeptidase with thrombospondin type 1 motif 9	1.40423	1.91648	1.19164	0.375689		0.973848	2.21844	1.71467	0.00362103
PRIMA1	proline rich membrane anchor 1	0.675124	1.10605	1.24697	0.221036		0.425534	0.837524	1.71442	9.08561e-05
MANEAL	mannosidase endo-alpha like	2.49958	4.08771	1.24518	0.207781		1.68417	3.40471	1.71332	7.25225e-05
MUC20	mucin 20, cell surface associated	6.85986	7.6386	1.12005	0.594849		3.85574	7.97341	1.71328	4.90341e-06
MIXL1	Mix paired-like homeobox	0.50601	0.581202	1.12372	0.595501		0.350741	0.712445	1.71326	0.000744515
ABCC8	ATP binding cassette subfamily C member 8	1.21238	1.23992	0.902495	0.559341		0.664882	1.3982	1.7121	0.00116815
AES	amino-terminal enhancer of split	69.1834	116.055	1.57958	2.72279e-14		64.7992	119.018	1.71186	1.5195e-21
C6orf223	chromosome 6 open reading frame 223	0.257728	0.543629	1.43186	0.0437179		0.203272	0.45416	1.71094	0.00744224
CAMTA2	calmodulin binding transcription activator 2	5.57049	6.92016	1.20482	0.112191		4.0564	7.56598	1.71088	1.38064e-23
SLC43A1	solute carrier family 43 member 1	6.28893	8.70338	1.19911	0.263233		4.78586	9.16439	1.71077	4.69736e-08
LINC01101	long intergenic non-protein coding RNA 1101	0.0291783	0.0510702	1.07846	0.999875		0.0077152	0.0757488	1.71049	0.0133076
C17orf96	chromosome 17 open reading frame 96	0.220324	0.601619	1.53971	0.0104538		0.243769	0.541282	1.71012	0.00531496
IKZF2	IKAROS family zinc finger 2	1.32984	1.48511	1.07055	0.669313		0.858865	1.67354	1.70945	7.58291e-07
IFI6	interferon alpha inducible protein 6	31.5161	59.8543	1.42551	0.0265289		24.0014	48.6398	1.70898	1.72336e-07
FBXW8	F-box and WD repeat domain containing 8	3.4715	4.43273	1.13597	0.352432		2.30222	4.33191	1.70897	2.26345e-17
KRTAP5-AS1	KRTAP5-1/KRTAP5-2 antisense RNA 1	1.24006	1.43049	1.02934	0.913308		0.837921	1.8284	1.70857	2.96123e-05
DNAH5	dynein axonemal heavy chain 5	0.0650673	0.0610375	0.91059	0.700278		0.0340821	0.0791071	1.70786	0.0035664
LINC01132	long intergenic non-protein coding RNA 1132	0.173922	0.211603	1.02208	0.938842		0.126148	0.282146	1.70783	0.00377308
FOXD2	forkhead box D2	1.28672	0.764598	0.955133	0.86941		0.322948	0.72085	1.70774	0.00138462
GMPR	guanosine monophosphate reductase	1.56471	2.38091	1.14864	0.511599		1.07892	2.32178	1.70773	0.00107784
GLS2	glutaminase 2	1.52479	2.05247	1.18814	0.243872		0.919613	1.74773	1.70685	2.02331e-06
GLB1L3	galactosidase beta 1 like 3	0.0186831	0.0677807	1.1601	0.999875		0.00299533	0.0648314	1.70459	0.0101793
TFF2	trefoil factor 2	517.755	772.861	1.04415	0.798197		14.5933	919.607	1.70368	0.00835379
SLC2A10	solute carrier family 2 member 10	3.30657	2.18952	0.819635	0.332115		1.28143	2.47398	1.70347	1.93839e-06
PCAT1	prostate cancer associated transcript 1 (non-protein coding)	0.205333	0.260011	1.08871	0.734235		0.122391	0.320029	1.70216	0.0166398
RP11-93B14.5	#N/A	1.07627	2.25368	1.44891	0.0291747		1.08394	2.21798	1.70182	0.000537345
NMB	neuromedin B	0.849093	1.815	1.4909	0.0159405		0.846858	1.75478	1.70087	0.00125203
SPAG17	sperm associated antigen 17	0.475829	0.593371	1.14809	0.472035		0.28175	0.564592	1.70028	2.99617e-05
CXCL17	C-X-C motif chemokine ligand 17	0.504669	1.17402	1.1903	0.330812		0.0582854	1.34956	1.69966	0.0103878
MPPED2	metallophosphoesterase domain containing 2	0.0697527	0.0497744	0.831683	0.382124		0.0281567	0.0779996	1.69949	0.0185872
PLCE1-AS1	PLCE1 antisense RNA 1	2.25393	1.52897	0.829877	0.35617		0.897332	1.80676	1.69929	0.000279319
SLCO4A1	solute carrier organic anion transporter family member 4A1	1.4755	3.04004	1.40916	0.0438673		1.46114	2.96192	1.6989	9.86079e-05
NECTIN1	Nectin cell adhesion molecule 1	6.59947	9.9192	1.32789	0.0189709		5.06108	9.31978	1.69793	1.85423e-25
KLK6	kallikrein related peptidase 6	0.0715144	2.60368	1.28445	0.0448794		0.0503066	1.77632	1.69731	0.0095976
SHANK2	SH3 and multiple ankyrin repeat domains 2	2.82314	2.87843	0.902005	0.573702		1.63872	3.12763	1.69643	9.38627e-08
WFDC2	WAP four-disulfide core domain 2	10.0496	4.92456	0.882806	0.579205		1.58952	3.43576	1.69613	0.00224233
ROBO2	roundabout guidance receptor 2	0.425882	0.551396	1.09578	0.549339		0.325533	0.699095	1.69608	6.21516e-06
S100A3	S100 calcium binding protein A3	0.20642	0.366395	1.2066	0.346734		0.103785	0.407303	1.69595	0.0233722
IGFBP5	insulin like growth factor binding protein 5	16.8085	28.953	1.36378	0.039009		11.7611	22.7119	1.6956	2.29623e-05
LINC00964	long intergenic non-protein coding RNA 964	0.0872923	0.0907791	1.01359	0.965635		0.0419521	0.109388	1.6956	0.0205631
MYEOV	myeloma overexpressed	0.355787	1.91666	1.52889	0.0110984		0.433287	1.32118	1.69489	0.0224138
FOXA3	forkhead box A3	7.26052	10.1527	1.26064	0.154901		4.82505	9.17078	1.69421	4.30013e-08
SSTR5-AS1	SSTR5 antisense RNA 1	0.667194	0.803374	1.15635	0.435392		0.457225	0.928223	1.69403	0.000880896
THBS2	thrombospondin 2	1.14771	7.63243	1.45109	0.02949		0.665002	1.68642	1.69353	0.0109952
SND1-IT1	SND1 intronic transcript 1	1.01928	1.1761	1.05838	0.80607		0.634813	1.24363	1.69316	0.000597183
CCAT2	colon cancer associated transcript 2 (non-protein coding)	0.172784	0.232809	1.08104	0.760896		0.0865726	0.216114	1.69242	0.0194051
NETO2	neuropilin and tolloid like 2	1.40423	3.81405	1.3082	0.163963		0.92534	2.0464	1.69063	0.00377833
C1QTNF1	C1q and tumor necrosis factor related protein 1	1.7705	2.35805	1.13419	0.51209		1.33104	2.70626	1.68978	0.000215212
PWAR1	Prader Willi/Angelman region RNA 1	0.238678	0.238211	0.999637	0.999033		0.117587	0.254388	1.68928	0.0114889
EPHB4	EPH receptor B4	9.08588	15.5372	1.30567	0.111543		6.86012	13.2565	1.68896	2.99374e-06
IGSF10	immunoglobulin superfamily member 10	0.695366	0.83659	0.990479	0.97356		0.389692	0.747446	1.68851	3.25427e-06
HHLA3	HERV-H LTR-associating 3	0.522093	0.808299	1.21761	0.340474		0.365909	0.798021	1.68794	0.00506996
CDC42EP1	CDC42 effector protein 1	14.7713	20.5113	1.21368	0.259722		11.6143	21.5555	1.68757	2.11228e-10
ACTC1	actin, alpha, cardiac muscle 1	0.165372	0.118657	0.936149	0.769588		0.0556238	0.132046	1.68743	0.0185298
ZNF362	zinc finger protein 362	4.14489	5.34195	1.12928	0.382614		2.93075	5.57378	1.68553	5.04237e-11
ENC1	ectodermal-neural cortex 1	12.7103	24.3513	1.28718	0.157484		10.3261	22.3494	1.68548	0.000110365
KCNN2	potassium calcium-activated channel subfamily N member 2	0.112548	0.0802975	0.884999	0.57777		0.049197	0.142979	1.6854	0.0250683
TMEM233	transmembrane protein 233	0.162132	0.168471	1.02573	0.929231		0.0819148	0.216518	1.6846	0.0211561
LINC00950	long intergenic non-protein coding RNA 950	0.244447	0.231525	0.887654	0.604438		0.128228	0.277286	1.68447	0.00200365
GLYATL1	glycine-N-acyltransferase like 1	0.678698	0.961392	1.16925	0.435867		0.584623	1.21117	1.68412	0.00107337
NYAP1	neuronal tyrosine phosphorylated phosphoinositide-3-kinase adaptor 1	0.169233	0.191121	0.990571	0.976238		0.0953079	0.216468	1.68385	0.0134113
GJB7	gap junction protein beta 7	0.247362	0.219078	0.931651	0.778487		0.100948	0.240337	1.68367	0.0208808
CRTC2	CREB regulated transcription coactivator 2	3.44306	5.42143	1.42232	0.00224198		2.95038	5.5535	1.68326	2.10454e-11
IGFBP2	insulin like growth factor binding protein 2	47.0342	68.8319	1.29604	0.061433		33.9815	69.3302	1.68269	0.00355834
PCCA-AS1	PCCA antisense RNA 1	1.76191	1.03601	0.767605	0.172729		0.561393	1.26961	1.68209	0.0122059
C6orf132	chromosome 6 open reading frame 132	5.2537	7.85871	1.34989	0.00914926		4.68882	8.8064	1.68195	2.39229e-16
FERMT1	fermitin family member 1	24.2203	34.3807	1.18537	0.36006		15.8073	31.4999	1.68177	1.73037e-07
SEMA4G	semaphorin 4G	13.7077	15.4209	1.17272	0.307109		9.67469	17.5698	1.68139	3.28435e-13
LZTS3	#N/A	5.0091	7.33951	1.23909	0.133206		3.50178	6.99973	1.68125	3.07676e-07
NPPA	natriuretic peptide A	0.596784	0.502795	0.893101	0.626205		0.211797	0.514966	1.6811	0.0170255
TAS2R3	taste 2 receptor member 3	1.47842	1.16567	0.766669	0.131352		0.674941	1.42823	1.68093	0.00468328
HOXA1	homeobox A1	0.292889	0.45483	1.2684	0.232275		0.183172	0.392088	1.68019	0.00623068
FAM107A	family with sequence similarity 107 member A	1.1986	1.99792	1.43998	0.00508087		1.12738	2.09279	1.67998	7.39383e-06
NPTXR	neuronal pentraxin receptor	0.306765	0.365525	1.07529	0.766796		0.187972	0.384477	1.67992	0.00219839
SETBP1	SET binding protein 1	2.64104	2.72797	0.956632	0.851143		1.48075	2.79099	1.67944	4.02167e-13
ZFHX3	zinc finger homeobox 3	2.86468	3.13065	0.965357	0.868837		1.69303	3.20102	1.67887	9.15419e-08
KIAA0754	#N/A	4.97759	7.15826	1.21164	0.171338		3.4394	6.62868	1.67887	1.91091e-08
TRPV4	transient receptor potential cation channel subfamily V member 4	0.291491	0.249977	0.905123	0.67826		0.141481	0.315007	1.67868	0.00715245
DZIP1L	DAZ interacting zinc finger protein 1 like	1.56791	1.19754	0.847732	0.442728		0.874581	1.78234	1.67851	9.27794e-05
PCDHB13	protocadherin beta 13	0.289562	0.33241	0.952443	0.856669		0.173638	0.385743	1.67825	0.00955732
CNKSR1	connector enhancer of kinase suppressor of Ras 1	5.61381	8.21229	1.35456	0.0173791		4.78763	8.72865	1.67817	2.3049e-17
PROX1	prospero homeobox 1	2.73485	3.84274	1.14722	0.331787		1.82763	3.6651	1.67785	6.47006e-06
DLEU7-AS1	DLEU7 antisense RNA 1	0.222772	0.256895	1.02346	0.938493		0.154134	0.410851	1.67768	0.0216272
MDC1	mediator of DNA damage checkpoint 1	2.51597	2.92046	1.07509	0.632451		1.65273	3.05983	1.67646	7.55801e-10
MDFI	MyoD family inhibitor	0.888131	1.46923	1.2117	0.36116		0.610429	1.28355	1.67525	0.00215475
AHDC1	AT-hook DNA binding motif containing 1	1.05986	1.21536	1.04866	0.836541		0.69049	1.30348	1.67511	1.89892e-06
KCNJ11	potassium voltage-gated channel subfamily J member 11	0.578742	0.728704	1.10537	0.638312		0.371011	0.716209	1.67467	0.000286205
PIK3R2	phosphoinositide-3-kinase regulatory subunit 2	13.2474	17.6359	1.25589	0.00998407		10.6718	19.7967	1.67443	6.89043e-14
C10orf113	chromosome 10 open reading frame 113	0.183305	0.237473	1.02856	0.999875		0.050398	0.255378	1.67403	0.0223617
CERS6-AS1	CERS6 antisense RNA 1	37.1858	61.8672	1.34801	0.00856517		27.1845	55.0515	1.67345	8.49855e-08
TDRD5	tudor domain containing 5	0.552335	1.16644	1.32407	0.121016		0.499115	1.08274	1.67334	0.00168882
C1orf127	chromosome 1 open reading frame 127	0.531813	0.462353	0.891833	0.574155		0.308013	0.595485	1.67222	0.000630414
MMP7	matrix metallopeptidase 7	0.765351	6.61895	1.61216	0.00177941		0.197587	5.71191	1.67216	0.0119371
RET	ret proto-oncogene	0.606377	0.894548	1.19607	0.29339		0.388138	0.742681	1.67172	0.000232778
CNOT4	CCR4-NOT transcription complex subunit 4	4.87376	6.407	1.25347	0.00648652		3.55524	6.58806	1.6717	1.03584e-15
MOB3A	MOB kinase activator 3A	5.28449	7.01079	1.3058	0.0117526		4.02678	7.22532	1.67099	5.20771e-18
ANKFN1	ankyrin repeat and fibronectin type III domain containing 1	0.217314	0.198553	0.983503	0.955304		0.0882689	0.21539	1.67096	0.0206461
SETD1B	SET domain containing 1B	3.29547	4.11906	1.14637	0.341867		2.27478	4.1291	1.66954	4.07553e-11
RP11-310P5.1	0	0.145811	0.418832	1.43362	0.0383984		0.111224	0.302236	1.66925	0.0262158
PPM1H	protein phosphatase, Mg2+/Mn2+ dependent 1H	4.15226	6.35661	1.32981	0.0128028		3.55556	6.76175	1.66909	4.65488e-10
KRT6B	keratin 6B	0.0195606	0.0867051	1.0821	0.999875		0.0115928	0.139993	1.66866	0.016039
FOXJ2	forkhead box J2	3.71572	4.65538	1.16687	0.2161		2.62777	4.8906	1.66816	8.27857e-13
ART3	ADP-ribosyltransferase 3	0.335429	0.41087	0.993655	0.985329		0.189985	0.446277	1.66809	0.0188679
MMP13	matrix metallopeptidase 13	0.926512	1.06891	1.02375	0.937642		0.562897	1.28499	1.66697	0.0113005
APBB2	amyloid beta precursor protein binding family B member 2	4.84676	6.68032	1.19736	0.067096		3.61351	6.80169	1.66594	5.21316e-14
TRNP1	TMF1-regulated nuclear protein 1	2.94692	6.49582	1.31644	0.15319		3.0631	8.03344	1.66576	0.00560296
C6orf58	chromosome 6 open reading frame 58	352.564	475.343	1.03563	0.85686		8.54142	403.272	1.66531	0.0113507
LOC730102	#N/A	13.8034	22.4719	1.36991	0.0111874		12.0475	23.2375	1.66522	1.5518e-09
R3HDM2	R3H domain containing 2	9.99544	13.9552	1.20859	0.116106		7.42491	14.0397	1.66516	5.47599e-12
AGR2	anterior gradient 2, protein disulphide isomerase family member	777.421	1050.55	1.13499	0.579691		461.042	884.533	1.6651	1.05702e-06
ZNF69	zinc finger protein 69	3.51543	4.57161	1.15369	0.486766		2.15482	4.2056	1.66481	7.2188e-06
DCC	DCC netrin 1 receptor	0.0698143	0.0524116	0.912226	0.70865		0.0348719	0.0736016	1.66446	0.00838585
MAGEA11	MAGE family member A11	0.0049885	0.0489068	1.08366	0.999875		0.0128184	0.774245	1.66422	0.0111216
LINC00853	long intergenic non-protein coding RNA 853	0.210344	0.399743	1.23702	0.283594		0.0958931	0.340732	1.66419	0.0299832
GRAMD2	GRAM domain containing 2	0.787504	0.71835	0.849155	0.371518		0.424076	1.04011	1.66354	0.00242995
TRIP6	thyroid hormone receptor interactor 6	6.43243	11.1229	1.24572	0.22729		5.32084	10.3797	1.66353	3.95985e-05
TLR5	toll like receptor 5	1.02962	1.68042	1.27826	0.0840906		0.795689	1.53083	1.66351	1.94637e-07
TCTEX1D4	Tctex1 domain containing 4	0.983655	1.55874	1.12088	0.627879		0.812969	1.68694	1.66256	0.00769189
HOXA10	homeobox A10	1.1052	1.53775	1.01875	0.923859		0.00552772	0.818366	1.66245	0.010523
LOC100129617	#N/A	1.41082	1.42053	0.952403	0.848794		0.864141	1.64527	1.66221	3.29162e-05
SAP30L-AS1	SAP30L antisense RNA 1 (head to head)	1.27853	1.57582	1.08094	0.653785		0.909655	1.72651	1.66199	2.99414e-05
SLC26A9	solute carrier family 26 member 9	0.0225724	0.0391392	1.05587	0.999875		0.00602173	0.0566866	1.66125	0.0184631
IL1B	interleukin 1 beta	1.12353	1.53063	1.16303	0.49192		0.983951	2.55881	1.66055	0.0135187
G6PC2	glucose-6-phosphatase catalytic subunit 2	0.590264	0.419339	0.82232	0.276847		0.171967	0.433724	1.66022	0.0226434
SETD5	SET domain containing 5	14.1333	18.0336	1.16415	0.111281		9.69138	17.8515	1.66014	1.89512e-12
NHSL2	NHS like 2	0.706868	0.883685	1.1389	0.4727		0.484401	0.917845	1.65941	3.93366e-05
TMEM132B	transmembrane protein 132B	0.254312	0.284826	0.946522	0.786945		0.130936	0.26701	1.65932	0.0021454
FGA	fibrinogen alpha chain	0.031346	0.00963969	0.897523	0.999875		0.0253536	0.0817983	1.65876	0.0314721
EYS	eyes shut homolog (Drosophila)	0.670801	0.658606	0.92282	0.577478		0.37429	0.702402	1.6581	3.63276e-07
EFNB3	ephrin B3	0.168039	0.268906	1.23061	0.310012		0.139163	0.293657	1.65793	0.00489551
PRRC2A	proline rich coiled-coil 2A	15.0945	19.6599	1.18088	0.279212		11.2266	20.3188	1.65671	3.51618e-21
PTGS2	prostaglandin-endoperoxide synthase 2	1.17887	1.09656	0.974927	0.927322		0.785782	2.04707	1.65645	0.0241895
RNF43	ring finger protein 43	26.587	36.0364	1.15311	0.406504		17.4707	36.2714	1.65629	0.00142333
LOC284578	#N/A	0.204186	0.121658	0.893694	0.567529		0.0317206	0.098954	1.6561	0.0319966
OR7E91P	olfactory receptor family 7 subfamily E member 91 pseudogene	0.0212145	0.293582	1.49161	0.00705364		0.0135815	0.109322	1.65501	0.0205133
PPP1R10	protein phosphatase 1 regulatory subunit 10	16.1195	21.8873	1.32968	0.00016643		12.9781	23.8163	1.65498	2.3324e-13
FMN1	formin 1	3.26794	2.78553	0.942721	0.797172		1.39723	2.64235	1.65493	1.97253e-08
HSF4	heat shock transcription factor 4	2.70631	3.34587	1.07685	0.750259		1.57496	2.95366	1.65404	3.38002e-05
AFF2	AF4/FMR2 family member 2	0.0649643	0.097275	1.29606	0.130892		0.0422294	0.0902977	1.6536	0.00357697
HYMAI	Hydatidiform mole associated and imprinted conserved region 1	0.344672	0.24217	0.788162	0.181998		0.149966	0.294642	1.65339	0.00185649
ZDHHC2	zinc finger DHHC-type containing 2	9.50196	12.8113	1.16108	0.383586		7.70611	15.4518	1.65223	1.37751e-05
TCTN2	tectonic family member 2	2.05273	2.38728	1.09295	0.617513		1.29281	2.43344	1.65213	1.68385e-08
PSORS1C3	psoriasis susceptibility 1 candidate 3 (non-protein coding)	4.21575	7.39008	1.08495	0.700782		1.89111	3.42822	1.65192	0.000187947
CCDC162P	coiled-coil domain containing 162, pseudogene	2.02595	0.895808	0.843991	0.408004		0.275175	0.630181	1.65163	0.0235849
POPDC3	popeye domain containing 3	0.0871331	0.152775	1.11643	0.580113		0.0134775	0.0824029	1.6516	0.0248677
NCOA6	nuclear receptor coactivator 6	8.31159	8.61649	0.968842	0.881346		5.27135	9.78085	1.65033	3.16216e-11
DLGAP4	DLG associated protein 4	3.68229	4.87465	1.14072	0.406423		2.73474	5.00584	1.65023	1.03929e-18
TMEM104	transmembrane protein 104	1.88408	2.30893	1.17746	0.228743		1.31459	2.33893	1.64993	9.78802e-14
JPH1	junctophilin 1	1.09513	1.03641	0.962736	0.894031		0.4111	0.841149	1.64927	0.00327214
RP11-426L16.8	#N/A	0.339308	0.623492	1.31452	0.151008		0.21761	0.479116	1.64899	0.0123488
MBD5	methyl-CpG binding domain protein 5	3.09907	4.40228	1.31168	2.76131e-05		2.44363	4.5459	1.64876	2.6318e-13
NUDT11	nudix hydrolase 11	0.604396	1.67659	1.28543	0.201329		0.464525	0.909724	1.64799	0.000654891
MXRA5	matrix remodeling associated 5	8.06061	7.99208	0.953279	0.791282		5.97649	11.6778	1.64758	2.91963e-06
APLP1	amyloid beta precursor like protein 1	0.582144	0.712425	1.04444	0.869975		0.367062	0.769324	1.64714	0.0080431
EFCAB14-AS1	EFCAB14 antisense RNA 1	14.4332	17.8343	1.15214	0.306479		9.78911	18.1674	1.64701	2.02576e-09
HBEGF	heparin binding EGF like growth factor	5.00169	12.8651	1.24016	0.284356		5.18963	15.8424	1.64694	0.0331826
KIAA1217	KIAA1217	9.07832	9.47195	0.994864	0.985329		5.70038	10.5578	1.64644	1.79122e-14
SORBS2	sorbin and SH3 domain containing 2	2.25529	2.76902	1.0071	0.979461		1.36242	2.53626	1.64506	4.19129e-07
UQCRBP1	ubiquinol-cytochrome c reductase binding protein pseudogene 1	0.678071	0.814866	1.11502	0.631331		0.344083	0.75747	1.64483	0.0154117
KCNQ1OT1	KCNQ1 opposite strand/antisense transcript 1 (non-protein coding)	2.08176	2.19496	0.930862	0.685646		1.28529	2.44767	1.64433	1.3216e-05
ERP27	endoplasmic reticulum protein 27	0.743943	0.799669	1.08439	0.728179		0.629239	1.39874	1.64393	0.00679875
CHRNA5	cholinergic receptor nicotinic alpha 5 subunit	2.6744	3.5239	1.17352	0.341867		1.70221	3.19546	1.64337	4.17542e-05
DUOX1	dual oxidase 1	1.10826	1.29558	0.978799	0.927488		0.639819	1.20156	1.64258	1.86824e-05
R3HDM1	R3H domain containing 1	4.81638	6.37134	1.10662	0.539697		3.258	6.18177	1.6422	8.22169e-09
LTF	lactotransferrin	1.34936	1.40485	1.01458	0.961481		0.578924	1.23647	1.64203	0.00234429
ABO	ABO blood group (transferase A, alpha 1-3-N-acetylgalactosaminyltransferase; transferase B, alpha 1-3-galactosyltransferase)	4.93775	5.94597	1.03323	0.904965		3.32336	6.13375	1.64195	7.58515e-05
PRICKLE4	prickle planar cell polarity protein 4	4.47824	6.14132	1.20186	0.214966		3.52172	6.57212	1.64097	7.75112e-08
PATZ1	POZ/BTB and AT hook containing zinc finger 1	4.31984	6.32507	1.29488	0.00183446		3.41673	6.24091	1.64093	3.43992e-11
MBOAT4	membrane bound O-acyltransferase domain containing 4	0.758668	0.57209	0.752873	0.111383		0.433093	0.904062	1.64079	0.00498351
TMPRSS3	transmembrane protease, serine 3	2.71761	3.94531	1.16309	0.456203		2.53747	5.09706	1.64079	4.21189e-05
RGS1	regulator of G-protein signaling 1	5.1202	6.03952	1.05435	0.842591		4.75054	15.0562	1.64077	0.0357366
BLACAT1	bladder cancer associated transcript 1 (non-protein coding)	0.489927	0.925592	1.2735	0.223135		0.455026	0.959273	1.64035	0.00202072
MYL9	myosin light chain 9	24.5284	46.7372	1.57771	0.00183446		24.621	45.7931	1.64007	6.81117e-05
TM4SF1-AS1	TM4SF1 antisense RNA 1	0.18506	0.290641	1.08489	0.698471		0.121259	0.331077	1.63991	0.0330571
THBS1	thrombospondin 1	19.3906	15.7756	0.886552	0.587641		10.5874	20.4509	1.63964	3.18021e-05
SLC35A4	solute carrier family 35 member A4	13.293	17.9932	1.28963	0.0277096		10.2467	18.0556	1.63934	1.37534e-17
PODXL	podocalyxin like	6.42759	9.54534	1.32803	0.00459427		5.07425	9.19328	1.63928	8.70501e-12
CALB1	calbindin 1	0.613122	0.577083	0.902889	0.6299		0.291571	0.644383	1.63918	0.00793451
PAPPA2	pappalysin 2	0.153799	0.150951	0.939394	0.812681		0.0898975	0.192849	1.63918	0.0134311
KCNJ14	potassium voltage-gated channel subfamily J member 14	0.275247	0.465293	1.30905	0.138303		0.184705	0.384554	1.63881	0.0139298
ZNF70	zinc finger protein 70	2.55238	2.75804	0.991614	0.967951		1.48872	2.67236	1.63803	1.09075e-11
CUEDC1	CUE domain containing 1	2.93663	3.73223	1.09274	0.671939		1.93739	3.73332	1.63758	9.63906e-06
CKMT2	creatine kinase, mitochondrial 2	1.37581	1.61046	1.03853	0.87504		0.842634	1.63989	1.63644	0.000562668
TFAP2A-AS1	TFAP2A antisense RNA 1	0.15996	0.261405	1.12693	0.593276		0.0662751	0.20839	1.63631	0.0370567
SLC45A3	solute carrier family 45 member 3	3.97243	5.31443	1.28142	0.123378		2.84457	5.07115	1.63495	1.19116e-07
KIAA1024	KIAA1024	0.337161	0.39411	1.06697	0.723744		0.187312	0.367797	1.63484	0.000419407
LINC01124	long intergenic non-protein coding RNA 1124	0.289043	0.50666	1.31725	0.139434		0.209475	0.442971	1.63465	0.0154317
PGC	progastricsin	708.859	1059.24	1.05033	0.799564		13.9781	1134.9	1.6343	0.01335
FAM47E	family with sequence similarity 47 member E	1.73888	2.15661	1.02547	0.923875		0.919335	1.85289	1.63405	0.000882726
HOMEZ	homeobox and leucine zipper encoding	5.94226	8.23092	1.25278	0.0123496		4.66134	8.42393	1.63393	4.08153e-21
ATP6V1E2	ATPase H+ transporting V1 subunit E2	0.404438	0.534122	1.14929	0.460419		0.32624	0.633671	1.63359	0.00208296
TTPA	alpha tocopherol transfer protein	0.721007	0.328133	0.879953	0.567012		0.244783	0.520932	1.63338	0.0191302
ST6GAL2	ST6 beta-galactoside alpha-2,6-sialyltransferase 2	0.222934	0.0493427	0.602554	0.0018891		0.0384649	0.0831937	1.63313	0.0200307
IQCK	IQ motif containing K	2.71102	3.03222	0.996331	0.989577		1.66459	3.10357	1.63273	8.57513e-09
ZSWIM4	zinc finger SWIM-type containing 4	0.791683	0.884627	1.00562	0.986157		0.553341	1.02896	1.63187	0.000207306
RP11-219G17.4	0	0.0712582	0.0643419	0.962458	0.887582		0.0415112	0.107506	1.63171	0.0352258
C6	complement component 6	0.402545	0.430062	0.994404	0.987204		0.3702	0.681987	1.63048	0.000783639
MAP3K6	mitogen-activated protein kinase kinase kinase 6	1.93742	2.50109	1.11405	0.587584		1.348	2.56298	1.62934	6.86923e-05
SNTB1	syntrophin beta 1	5.9352	6.89205	0.992403	0.981533		3.71719	6.88205	1.62927	2.00995e-06
EDARADD	EDAR-associated death domain	0.694139	0.745916	1.01125	0.966641		0.409757	0.761548	1.62877	0.000620051
SIGLEC17P	sialic acid binding Ig like lectin 17, pseudogene	0.854038	1.2812	1.40069	0.0168726		0.700753	1.28508	1.62869	0.000457979
MUC4	mucin 4, cell surface associated	2.33982	0.294019	0.707456	0.0501808		0.146615	0.281554	1.62834	0.0041983
ACADL	acyl-CoA dehydrogenase, long chain	0.139541	0.16058	1.01114	0.965063		0.0548675	0.16607	1.62803	0.0389361
PPP1R1C	protein phosphatase 1 regulatory inhibitor subunit 1C	0.12119	0.151245	1.0818	0.758139		0.093586	0.205471	1.62733	0.0160082
SYVN1	synoviolin 1	10.9926	14.2201	1.21051	0.147666		7.86162	13.7847	1.62716	1.27732e-12
NDNF	neuron-derived neurotrophic factor	2.33674	2.47725	0.969357	0.910878		1.13982	2.22034	1.62691	0.00234096
CELF3	CUGBP, Elav-like family member 3	0.622615	0.713053	0.978767	0.933856		0.364045	0.701412	1.62618	0.000248933
HES2	hes family bHLH transcription factor 2	1.25748	0.459411	0.875718	0.560525		0.257802	0.52395	1.62531	0.00477946
LDHAL6A	lactate dehydrogenase A like 6A	0.495106	0.447652	0.921219	0.703937		0.298569	0.557035	1.62524	0.0012799
BTG2	BTG family member 2	38.0834	43.3042	1.1157	0.195797		29.3184	56.5102	1.6249	2.29948e-05
PRSS54	protease, serine 54	0.24378	0.32057	1.03893	0.893245		0.142434	0.323638	1.6247	0.029188
SLC11A2	solute carrier family 11 member 2	50.5694	90.0532	1.24718	0.272664		46.9226	87.9183	1.6246	0.0300652
DYNLRB1	dynein light chain roadblock-type 1	31.8747	53.1223	1.54247	5.63272e-06		30.6433	57.8733	1.62444	7.43114e-10
WAS	Wiskott-Aldrich syndrome	2.76001	3.9707	1.33591	0.0854212		2.3671	4.24146	1.62433	1.79563e-05
NBR2	neighbor of BRCA1 gene 2 (non-protein coding)	2.17408	3.45823	1.24387	0.14006		1.84543	3.23182	1.62415	1.38053e-07
EYA2	EYA transcriptional coactivator and phosphatase 2	0.760494	0.257496	0.766051	0.155267		0.154603	0.336823	1.62406	0.0203523
SRRM2	serine/arginine repetitive matrix 2	42.2418	46.6888	0.949103	0.81823		25.8917	47.8545	1.62399	1.30232e-06
LOC100996634	#N/A	0.472891	0.539402	1.0455	0.870967		0.258204	0.523298	1.62352	0.0119712
RAD21-AS1	RAD21 antisense RNA 1	0.425954	0.827605	1.61228	0.000494262		0.406296	0.790522	1.62294	0.00259064
SYTL1	synaptotagmin like 1	6.37651	7.84962	1.10925	0.60149		3.78685	7.02563	1.62269	3.55782e-06
ANXA3	annexin A3	17.076	32.0834	1.35364	0.0688515		16.4731	28.9308	1.62236	7.63259e-05
TIAL1	TIA1 cytotoxic granule-associated RNA binding protein-like 1	13.2132	19.416	1.34786	0.000985823		9.93941	17.6888	1.62193	1.94244e-09
MGC50722	#N/A	0.057857	0.0407075	0.883979	0.999875		0.0197937	0.0616676	1.62182	0.0409499
MKL2	MKL1/myocardin like 2	7.1975	8.57373	1.05915	0.706636		4.82096	8.91449	1.62116	8.15987e-08
NAV2	neuron navigator 2	2.67305	2.75923	0.980701	0.9191		1.69306	3.04735	1.62097	3.07676e-07
CERS6	ceramide synthase 6	39.7888	64.1283	1.31454	0.0210833		29.3015	56.4363	1.62095	5.6117e-07
COBLL1	cordon-bleu WH2 repeat protein like 1	6.37276	7.9509	1.1337	0.261353		4.68419	8.58246	1.62051	1.08791e-10
CLUL1	clusterin like 1	0.269704	0.327974	1.04131	0.886168		0.158039	0.333698	1.61997	0.0148685
IQCH	IQ motif containing H	0.491923	0.51939	0.957743	0.845018		0.275301	0.506845	1.61994	0.000221215
MFAP3L	microfibrillar associated protein 3 like	0.678922	0.690859	1.01403	0.954701		0.497865	0.965563	1.61973	8.96903e-06
PPP1R13L	protein phosphatase 1 regulatory subunit 13 like	1.7874	2.39317	1.13186	0.553692		1.27388	2.35657	1.61971	4.69176e-05
TACC2	transforming acidic coiled-coil containing protein 2	7.83731	8.37658	1.00419	0.987302		4.70517	8.41935	1.6196	3.07514e-14
CPM	carboxypeptidase M	4.86712	2.92422	0.889614	0.601274		1.45992	2.83692	1.6195	0.000149597
GSC	goosecoid homeobox	0.303921	0.160542	0.803412	0.237868		0.153341	0.403528	1.61946	0.0396289
GJB5	gap junction protein beta 5	0.0560625	0.864374	1.30494	0.0660614		0.0733842	0.262587	1.6186	0.0404321
AIRN	antisense of IGF2R non-protein coding RNA	0.159709	0.146022	0.922104	0.748518		0.0865895	0.174633	1.61827	0.0102374
ZNF652	zinc finger protein 652	11.1562	13.8373	1.20607	0.000238512		8.13395	14.518	1.61787	8.05671e-22
HNF1A-AS1	HNF1A antisense RNA 1	5.98864	6.08294	0.955143	0.847506		3.26568	6.19003	1.61757	1.26259e-05
LSR	lipolysis stimulated lipoprotein receptor	29.4856	38.4791	1.26925	0.125361		21.9573	38.8272	1.61675	6.43398e-12
SLC9C1	solute carrier family 9 member C1	0.842264	0.644199	0.851667	0.436225		0.380485	0.713798	1.61632	0.000215212
DNAH7	dynein axonemal heavy chain 7	0.485573	0.229001	0.755637	0.140622		0.114972	0.2265	1.61558	9.57115e-05
TGIF1	TGFB induced factor homeobox 1	8.00109	12.4738	1.2669	0.103758		6.49178	12.2174	1.61553	8.22385e-06
TMEM171	transmembrane protein 171	18.9855	25.8149	1.36443	0.0071276		15.0679	30.1549	1.6154	2.28651e-07
TULP3	tubby like protein 3	3.38882	4.8898	1.33349	0.00348754		2.76336	5.01347	1.61491	5.41208e-12
LOC100506688	#N/A	0.184913	0.194348	0.966254	0.902891		0.0888251	0.177751	1.61485	0.0194262
RP11-31F15.2	0	0.341989	0.427132	1.06414	0.78529		0.201349	0.40767	1.61467	0.0140639
GNAO1	G protein subunit alpha o1	0.627859	0.840111	1.16806	0.371694		0.455149	0.803425	1.61337	1.3689e-07
DAB2IP	DAB2 interacting protein	12.9179	15.7301	1.18797	0.267916		9.75335	17.1285	1.61327	1.20018e-11
IL20RA	interleukin 20 receptor subunit alpha	2.81318	3.49917	1.03113	0.910754		1.77569	3.23654	1.61322	1.31619e-05
EVI2B	ecotropic viral integration site 2B	9.79632	12.4004	1.20278	0.30628		6.62613	12.2228	1.61273	1.19925e-06
PPP1R11	protein phosphatase 1 regulatory inhibitor subunit 11	32.1996	54.6103	1.64239	5.30776e-14		30.2409	53.135	1.61253	3.17462e-27
RP11-14D22.5	#N/A	0.255594	0.25443	1.00014	0.999578		0.155374	0.323973	1.61238	0.014777
PALMD	palmdelphin	2.28313	2.27145	0.940293	0.817014		1.27209	2.57324	1.61208	7.65341e-05
EFNA3	ephrin A3	1.19988	1.33856	1.15464	0.481319		0.666736	1.26567	1.61193	0.000517366
SUOX	sulfite oxidase	9.6343	13.0163	1.28807	5.7522e-05		7.67227	13.5175	1.61187	1.78488e-13
NDST4	N-deacetylase/N-sulfotransferase 4	0.0522122	0.0692815	1.08565	0.717454		0.0127444	0.0463625	1.61181	0.0395804
THY1	Thy-1 cell surface antigen	4.47886	6.85509	1.25688	0.199061		4.14876	7.36884	1.61064	5.08917e-08
ISG20L2	interferon stimulated exonuclease gene 20 like 2	8.55621	14.158	1.52079	6.01709e-07		7.34764	13.0752	1.61059	3.33225e-14
FAM86JP	family with sequence similarity 86 member J, pseudogene	0.411989	0.610088	1.16772	0.443983		0.345608	0.65322	1.61041	0.00282245
LRRIQ4	leucine rich repeats and IQ motif containing 4	0.175872	0.295698	1.21592	0.349934		0.114108	0.254371	1.61027	0.0283286
HOXA11-AS	HOXA11 antisense RNA	1.35822	0.524514	0.984215	0.805274		0.00284644	0.109972	1.6097	0.0180946
SLC27A1	solute carrier family 27 member 1	2.04446	2.47102	1.07576	0.737956		1.44946	2.55215	1.60969	1.1353e-06
AGT	angiotensinogen	1.40638	2.13937	1.20607	0.291605		1.08649	2.07569	1.60908	0.00114992
PACS1	phosphofurin acidic cluster sorting protein 1	4.84855	6.00423	1.17362	0.127538		3.92464	6.97184	1.60897	4.11903e-10
GNRHR	gonadotropin releasing hormone receptor	0.413246	0.301951	0.757527	0.0318489		0.247916	0.458954	1.60847	0.00296478
TLE2	transducin like enhancer of split 2	6.75615	7.33309	0.976708	0.923875		4.08865	7.63132	1.6082	7.53841e-06
ATF7IP2	activating transcription factor 7 interacting protein 2	4.55819	8.68436	1.36563	0.0176962		3.68947	7.18843	1.60805	7.85494e-06
RP11-142C4.6	0	0.100649	0.18603	1.17478	0.451668		0.0496966	0.1249	1.60794	0.0411955
HYAL1	hyaluronoglucosaminidase 1	2.03491	2.67863	1.08421	0.734338		1.43817	2.68043	1.60748	0.0023553
RUNX2	runt related transcription factor 2	2.28051	2.2853	1.02048	0.926885		1.40121	2.47723	1.60713	5.82391e-07
MIOX	myo-inositol oxygenase	0.149642	0.172512	1.02251	0.938842		0.0708046	0.178802	1.60696	0.0439847
STAC	SH3 and cysteine rich domain	0.0739261	0.0743584	0.978656	0.937642		0.0264176	0.0779715	1.60693	0.0455458
MN1	meningioma (disrupted in balanced translocation) 1	0.376177	0.538931	1.25836	0.191371		0.294555	0.52116	1.60691	2.4088e-05
AHCYL2	adenosylhomocysteinase like 2	38.3937	34.1468	1.04724	0.833543		21.8435	37.9696	1.60672	1.65158e-05
ZFHX2	zinc finger homeobox 2	0.25046	0.269104	0.962662	0.876298		0.167893	0.305583	1.60588	0.000463357
PACRG	PARK2 coregulated	0.580378	0.617204	0.996238	0.990866		0.469174	0.919107	1.60566	0.000866152
RNF38	ring finger protein 38	7.30443	10.037	1.2865	0.00803152		5.4763	9.76507	1.60557	6.23439e-15
FA2H	fatty acid 2-hydroxylase	5.61831	7.69158	1.25682	0.207781		4.00927	6.76537	1.60527	1.03495e-07
GFRA3	GDNF family receptor alpha 3	1.41626	1.53863	1.00944	0.971031		0.902511	1.80769	1.60516	0.00425326
ZNF391	zinc finger protein 391	0.760716	0.821948	1.04912	0.854231		0.51655	0.979056	1.60463	0.00327214
GPER1	G protein-coupled estrogen receptor 1	0.962191	0.649253	0.813159	0.316237		0.350205	0.671149	1.60459	0.0030856
MOK	MOK protein kinase	1.30748	1.96565	1.2314	0.243956		1.05128	1.96153	1.60445	0.000114686
TNFRSF19	tumor necrosis factor receptor superfamily member 19	1.07433	1.18042	0.958416	0.879611		0.592124	1.14076	1.60443	0.000647857
OAS3	2'-5'-oligoadenylate synthetase 3	6.00034	7.22144	1.13599	0.454845		4.011	7.45338	1.60344	1.00684e-07
SAMD13	sterile alpha motif domain containing 13	2.99565	2.90152	1.03608	0.897561		1.40592	2.63229	1.60344	0.000284931
KCNC1	potassium voltage-gated channel subfamily C member 1	0.0622418	0.0575241	0.955639	0.870009		0.0320996	0.0695211	1.60342	0.0230138
SPDYE3	speedy/RINGO cell cycle regulator family member E3	0.343855	0.441678	1.13794	0.4818		0.221202	0.419864	1.60292	0.00555492
TLE4	transducin like enhancer of split 4	3.60323	4.65061	1.31197	1.57374e-05		3.0185	5.29622	1.60111	5.88068e-12
ARHGAP40	Rho GTPase activating protein 40	0.524317	0.471342	0.97797	0.918922		0.0229105	0.60395	1.60068	0.0197237
CS	citrate synthase	35.5002	55.2589	1.45251	3.3591e-05		31.3333	55.418	1.60039	6.98738e-15
COPS7B	COP9 signalosome subunit 7B	4.02007	5.70242	1.33866	0.000684955		3.33795	5.77931	1.60025	2.97662e-12
STARD4-AS1	STARD4 antisense RNA 1	1.51875	1.67101	1.00099	0.996686		0.960361	1.734	1.59967	8.68486e-07
AP000479.1	0	0.0503384	0.0655801	1.06778	0.777979		0.00811795	0.0464401	1.59944	0.0333069
SLC7A8	solute carrier family 7 member 8	9.50519	11.6916	1.17766	0.251488		7.6839	13.3458	1.59913	1.32332e-14
TOR4A	torsin family 4 member A	8.45456	13.7221	1.39402	0.0132609		8.67593	15.3783	1.59897	6.11559e-07
AFAP1-AS1	AFAP1 antisense RNA 1	0.920807	1.05135	0.968706	0.903557		0.590329	1.10467	1.5985	8.8428e-06
RP5-1180C10.2	#N/A	1.59894	1.66266	1.01137	0.963345		0.935349	1.65911	1.59845	3.29368e-06
EHF	ETS homologous factor	60.3418	63.8444	0.999267	0.998142		32.9614	61.1872	1.59804	2.91386e-08
TOX2	TOX high mobility group box family member 2	0.299058	0.300435	1.00751	0.982573		0.159974	0.301305	1.59603	0.010779
TM4SF1	transmembrane 4 L six family member 1	22.41	43.451	1.28101	0.197211		19.9781	37.8609	1.59555	1.91612e-05
OXA1L	OXA1L, mitochondrial inner membrane protein	48.6875	84.2207	1.64881	2.2389e-24		48.5424	83.0542	1.59528	2.15355e-12
C3orf20	chromosome 3 open reading frame 20	0.153763	0.143216	0.937826	0.806859		0.0861918	0.188406	1.59484	0.0261033
MTSS1	metastasis suppressor 1	4.18914	4.46705	0.985067	0.951288		2.46866	4.43638	1.59442	9.91469e-09
TP53	tumor protein p53	12.0989	18.8791	1.29986	0.0470698		9.6887	17.4038	1.59432	2.89107e-08
LPAR2	lysophosphatidic acid receptor 2	4.47442	6.53022	1.19006	0.292948		3.28043	5.80715	1.59429	1.73909e-08
COLGALT2	collagen beta(1-O)galactosyltransferase 2	0.450754	0.710789	1.13144	0.593614		0.237792	0.477775	1.59426	0.0138387
FSIP2	fibrous sheath interacting protein 2	1.8102	0.852008	0.780013	0.1905		0.485109	0.899063	1.59403	0.000359235
NUTM1	NUT midline carcinoma family member 1	0.282917	0.346556	1.08839	0.732291		0.214301	0.400718	1.59396	0.0101104
ZNF275	zinc finger protein 275	3.89647	4.34944	1.05749	0.65537		2.5341	4.3835	1.59364	1.97477e-16
ONECUT1	one cut homeobox 1	0.0413322	0.0352887	0.953943	0.999875		0.0325015	0.110213	1.59356	0.0473101
PRRX1	paired related homeobox 1	0.349846	0.44454	1.04447	0.875035		0.191563	0.381127	1.5931	0.0144901
ACSM3	acyl-CoA synthetase medium-chain family member 3	14.0951	16.2838	1.00933	0.973403		8.06648	15.2589	1.59295	0.000107953
SAP130	Sin3A associated protein 130	5.65321	6.74652	1.09996	0.535859		4.06534	7.13374	1.59291	6.1303e-15
BOK	BCL2-related ovarian killer	7.19542	9.80233	1.23913	0.174208		4.02802	7.77352	1.59274	0.00277747
FNDC4	fibronectin type III domain containing 4	0.715993	1.07575	1.23294	0.266943		0.669142	1.26833	1.59223	0.0010174
ATG9B	autophagy related 9B	0.254068	0.591748	1.34143	0.119301		0.271781	0.525433	1.5915	0.00616833
POU5F1	POU class 5 homeobox 1	0.698555	0.989553	1.14097	0.481287		0.618946	1.14582	1.59087	0.000209601
TSPYL4	TSPY-like 4	3.13381	4.54477	1.25456	0.00570883		2.29998	3.98539	1.58958	2.85779e-14
IL22	interleukin 22	0.0710822	0.0549597	0.948949	0.999875		0.0540973	0.265119	1.58948	0.0463358
SH3BGRL3	SH3 domain binding glutamate rich protein like 3	51.8736	77.3199	1.29665	0.117395		38.1958	67.358	1.589	1.01614e-07
ESRP2	epithelial splicing regulatory protein 2	10.8053	12.7847	1.13031	0.526194		7.28763	12.669	1.58886	4.7019e-09
PRH2	proline rich protein HaeIII subfamily 2	1.03753	0.881445	0.844533	0.298421		0.538044	0.947506	1.58846	2.24296e-05
TTR	transthyretin	6.93868	7.7613	1.01436	0.963225		3.33315	7.79701	1.58797	0.0388362
BRPF3	bromodomain and PHD finger containing 3	8.3003	9.30178	1.0904	0.622477		5.62725	9.86294	1.58794	2.4134e-14
DUSP18	dual specificity phosphatase 18	4.83515	6.1327	1.13074	0.477322		2.96717	5.60797	1.58747	2.70701e-05
SATL1	spermidine/spermine N1-acetyl transferase-like 1	0.960888	1.34465	1.3053	0.0470698		0.68631	1.22453	1.58736	0.000508497
LPCAT2	lysophosphatidylcholine acyltransferase 2	4.64672	7.11253	1.33239	0.00556122		3.48581	6.44463	1.58696	4.3048e-12
SHC2	SHC adaptor protein 2	3.46778	4.86615	1.19384	0.317145		3.1238	5.54904	1.58604	9.53803e-05
KLK1	kallikrein 1	10.8026	13.3039	1.1093	0.64721		6.62867	11.4494	1.58586	5.49477e-05
MAB21L3	mab-21 like 3	0.622474	0.241685	0.804492	0.280707		0.138176	0.311239	1.58583	0.0302214
NAT6	N-acetyltransferase 6	1.99637	3.2432	1.50989	7.49312e-05		1.74992	3.07183	1.58553	4.153e-05
STOX2	storkhead box 2	1.97121	2.15442	1.01564	0.951288		1.17549	2.10076	1.58543	1.93227e-07
CLYBL-AS2	CLYBL antisense RNA 2	1.84324	1.43356	0.824253	0.307608		0.933082	1.74268	1.58532	0.00896769
KCNQ4	potassium voltage-gated channel subfamily Q member 4	0.227787	0.38006	1.39177	0.0422719		0.213649	0.382372	1.58522	0.00362521
KRTAP5-2	keratin associated protein 5-2	1.36183	1.4602	1.0097	0.97565		0.869728	1.80964	1.585	0.00624744
FASN	fatty acid synthase	6.58467	8.32296	1.1364	0.548881		4.80237	8.49075	1.58495	3.3144e-05
LINC01105	long intergenic non-protein coding RNA 1105	0.0249166	0.0221635	0.945345	0.824116		0.0119513	0.0269657	1.58447	0.0454448
PPP6C	protein phosphatase 6 catalytic subunit	14.9994	24.0772	1.56563	1.31878e-14		14.0796	24.1997	1.58432	3.24814e-19
HP	haptoglobin	0.17545	0.174706	0.996552	0.992004		0.146893	0.327194	1.58394	0.0376673
VENTX	VENT homeobox	0.233559	0.214199	0.975687	0.92625		0.114039	0.306275	1.58388	0.0486164
CCL21	C-C motif chemokine ligand 21	9.96573	14.9399	1.2828	0.20351		8.55778	15.3658	1.5836	0.00111815
DACH1	dachshund family transcription factor 1	5.57276	7.88634	1.13734	0.195767		3.91493	7.11403	1.58308	2.2376e-07
SF3A2	splicing factor 3a subunit 2	9.37074	12.2156	1.20719	0.149416		7.25156	12.6538	1.58301	9.05211e-12
NRG1	neuregulin 1	1.71625	2.25446	1.23833	0.160386		1.38396	2.34096	1.58298	7.70243e-05
GPRC5A	G protein-coupled receptor class C group 5 member A	29.2989	55.9631	1.34412	0.113793		23.6311	42.8836	1.58233	0.000369007
ANKRD13B	ankyrin repeat domain 13B	0.468022	0.791474	1.32664	0.111281		0.355718	0.681875	1.58214	0.00961551
FAM169A	family with sequence similarity 169 member A	1.15975	1.39207	1.03132	0.908811		0.665152	1.23411	1.5816	2.99617e-05
DNAH8	dynein axonemal heavy chain 8	0.0376472	0.0510941	1.08299	0.753559		0.0266483	0.0581568	1.58135	0.0319321
SLC1A5	solute carrier family 1 member 5	10.1493	10.4771	1.01256	0.968156		4.88071	8.40826	1.58035	4.44247e-05
CCDC97	coiled-coil domain containing 97	3.88497	4.9485	1.20874	0.137774		3.13113	5.37079	1.58011	7.63362e-16
CREB3L4	cAMP responsive element binding protein 3 like 4	10.3657	12.7171	1.08111	0.734176		6.66665	12.1581	1.58011	4.18461e-06
RBMS2	RNA binding motif single stranded interacting protein 2	4.48639	5.43127	1.10665	0.558536		3.05565	5.2613	1.57981	1.17584e-08
NAT10	N-acetyltransferase 10	8.06204	13.265	1.39833	0.000933243		6.50395	11.1388	1.57947	4.92016e-11
TOX	thymocyte selection associated high mobility group box	5.77656	7.83826	1.22723	0.0196617		4.31202	7.33831	1.57898	3.16779e-19
VWA3B	von Willebrand factor A domain containing 3B	0.128729	0.11054	0.99673	0.992518		0.0662241	0.132792	1.57875	0.0303408
SEMA4A	semaphorin 4A	2.13705	2.14499	1.02534	0.920828		1.41018	2.47215	1.57854	4.33197e-05
FBXL7	F-box and leucine rich repeat protein 7	0.932113	1.2026	1.19629	0.227095		0.693124	1.1502	1.57831	3.43277e-05
APCDD1	adenomatosis polyposis coli down-regulated 1	2.19679	3.67644	1.19184	0.325985		1.60831	2.85681	1.57826	0.00101444
TEAD1	TEA domain transcription factor 1	6.51407	9.38147	1.15269	0.31943		4.87843	8.80664	1.57788	1.39455e-06
MKI67	marker of proliferation Ki-67	11.0665	11.8399	0.996478	0.989372		7.76312	14.2876	1.57683	7.70011e-06
SYT17	synaptotagmin 17	1.37844	1.76317	1.09622	0.646819		0.824273	1.44294	1.57663	0.000627355
DYX1C1	dyslexia susceptibility 1 candidate 1	0.246313	0.398217	1.22444	0.316733		0.182369	0.356985	1.57638	0.015274
LOC145474	#N/A	0.823454	0.717649	0.853295	0.446107		0.43639	0.79453	1.57605	0.00382337
GPX3	glutathione peroxidase 3	16.7417	25.2198	1.37964	0.0270945		16.0399	28.315	1.57598	4.06889e-06
ZIC4	Zic family member 4	0.00457519	0.019328	1.09502	0.999875		0.0058533	0.0360433	1.57582	0.0403925
ASXL2	additional sex combs like 2, transcriptional regulator	9.20322	10.5579	1.05571	0.741086		6.34395	11.237	1.57577	5.46441e-10
PAX8	paired box 8	0.890993	0.924865	0.961182	0.887159		0.622728	1.11972	1.57443	0.00343102
GPR64	#N/A	0.796516	0.793254	0.907367	0.585123		0.504132	0.956939	1.57419	0.000808673
C17orf107	chromosome 17 open reading frame 107	1.31691	1.16647	0.914547	0.677401		0.632401	1.13985	1.57387	0.000446696
ZC4H2	zinc finger C4H2-type containing	2.4301	3.86557	1.49215	1.33464e-07		2.4962	4.41247	1.57369	5.71316e-09
CCL22	C-C motif chemokine ligand 22	0.442622	0.478442	1.14162	0.499661		0.276597	0.604317	1.57306	0.0328382
LOC100128531	#N/A	1.6509	1.46247	0.887482	0.58898		0.999178	1.82853	1.57286	0.00518817
PTPN14	protein tyrosine phosphatase, non-receptor type 14	1.59329	1.95397	1.0269	0.907149		1.06072	1.9288	1.57282	6.30219e-05
FRMD5	FERM domain containing 5	0.525777	0.62891	1.02845	0.917129		0.36063	0.683849	1.57265	0.00649308
DCLRE1B	DNA cross-link repair 1B	1.57367	2.53182	1.45334	0.000285942		1.4738	2.59845	1.57247	4.16152e-07
CLC	Charcot-Leyden crystal galectin	6.48265	11.3161	1.48427	0.00313164		6.0319	11.6374	1.57234	3.33977e-05
LDHD	lactate dehydrogenase D	8.2006	5.52002	0.873264	0.535388		4.92103	8.7419	1.57201	0.000782803
ETV5	ETS variant 5	2.90582	3.62715	1.12318	0.572663		2.10463	3.72133	1.57181	1.10061e-05
MAP4	microtubule associated protein 4	13.8925	18.0195	1.16423	0.210375		11.0658	19.0573	1.57109	4.23276e-13
NFE2	nuclear factor, erythroid 2	0.175856	0.248807	1.21052	0.362745		0.133935	0.282531	1.57102	0.0389886
RP5-833A20.1	#N/A	1.81514	1.60324	0.857572	0.479046		1.04008	1.94992	1.57093	0.015279
DSG4	desmoglein 4	0.370056	0.517481	1.1481	0.479142		0.241611	0.476014	1.57031	0.0174261
CCNK	cyclin K	8.59851	10.6228	1.0818	0.707999		5.87322	10.4918	1.56972	6.4107e-05
PTCHD2	#N/A	0.0994433	0.10054	0.913129	0.714257		0.0589269	0.122555	1.56968	0.037559
DUSP10	dual specificity phosphatase 10	1.63022	2.93824	1.25266	0.237167		1.41393	2.58407	1.56961	0.00014636
SSH2	slingshot protein phosphatase 2	5.21969	6.35579	1.15484	0.25193		3.42196	5.86494	1.56926	1.74393e-11
PGAP1	post-GPI attachment to proteins 1	5.8414	9.64781	1.15471	0.458163		3.88277	7.49001	1.56899	0.000532262
UBQLN4	ubiquilin 4	3.92564	5.55063	1.23381	0.0989016		2.98244	5.16371	1.56881	8.23742e-10
NIPAL2	NIPA like domain containing 2	11.9025	12.465	1.078	0.694636		7.4712	13.2413	1.5688	3.03984e-11
KCND1	potassium voltage-gated channel subfamily D member 1	0.240237	0.279489	1.00146	0.99688		0.17759	0.320815	1.56875	0.00314864
NAV3	neuron navigator 3	0.176152	0.231783	1.00461	0.989194		0.104024	0.174013	1.56805	0.00243203
VGF	VGF nerve growth factor inducible	0.0980971	0.155361	1.21288	0.354461		0.0682154	0.148767	1.56734	0.04613
KCNK17	potassium two pore domain channel subfamily K member 17	1.13422	1.22511	1.00185	0.99594		0.69926	1.36368	1.56685	0.00787622
MT1F	metallothionein 1F	48.9117	68.1388	1.10971	0.609672		40.5102	72.8057	1.56671	0.000100512
NCSTN	nicastrin	35.5018	49.4423	1.39599	2.54045e-05		31.9493	54.8231	1.56669	8.58382e-16
DDAH1	dimethylarginine dimethylaminohydrolase 1	41.8823	62.9013	1.33897	0.00311744		34.8995	61.2385	1.56578	4.67996e-23
ZFHX4	zinc finger homeobox 4	0.0552334	0.0845862	1.09084	0.72592		0.0442715	0.102948	1.56568	0.0478861
RP11-231I16.1	0	0.73136	0.807075	0.98584	0.953608		0.418691	0.731709	1.56529	0.000469033
NFAT5	nuclear factor of activated T-cells 5, tonicity-responsive	8.35382	8.22182	0.896415	0.512131		4.92191	8.72024	1.56518	1.56502e-05
MYADML2	myeloid-associated differentiation marker-like 2	0.142551	0.333746	1.48196	0.0248112		0.15307	0.323232	1.56517	0.0452364
RGL3	ral guanine nucleotide dissociation stimulator like 3	1.06234	0.83607	0.85857	0.493981		0.487864	0.965507	1.565	0.00781764
AR	androgen receptor	0.131274	0.130869	0.971466	0.920243		0.070126	0.130132	1.56417	0.0159718
IFFO2	intermediate filament family orphan 2	2.06977	2.59042	1.04849	0.861103		1.19939	2.09684	1.56393	1.26552e-07
ST18	ST18, C2H2C-type zinc finger	1.03937	1.47804	1.19487	0.274442		0.795488	1.45292	1.56379	0.000239637
PCDH19	protocadherin 19	0.397444	0.339056	0.90272	0.664567		0.206029	0.366114	1.56378	0.000283546
PHGDH	phosphoglycerate dehydrogenase	4.33142	5.70582	1.04942	0.848305		2.13928	3.81442	1.56376	0.000360398
SLC24A1	solute carrier family 24 member 1	2.16953	2.81626	1.15451	0.126294		1.72324	3.11462	1.56367	1.55017e-11
RP11-346I3.4	#N/A	0.306639	0.207722	0.831042	0.381439		0.13369	0.260565	1.56273	0.0131428
RP11-279F6.1	#N/A	2.08998	1.92698	0.881405	0.577478		0.852279	1.61892	1.56245	0.00987328
TPP1	tripeptidyl peptidase 1	13.5034	15.9965	1.15268	0.325536		10.5385	17.7073	1.56179	2.46375e-06
CDKN2A	cyclin dependent kinase inhibitor 2A	0.182625	0.320371	1.23571	0.302167		0.174191	0.368756	1.5617	0.0421292
NR2F2	nuclear receptor subfamily 2 group F member 2	3.15226	3.46163	0.983869	0.946634		1.96727	3.45129	1.56133	9.7187e-07
CKAP4	cytoskeleton-associated protein 4	21.9197	22.3489	0.989294	0.968781		12.2475	20.9867	1.56114	1.64137e-08
SPI1	Spi-1 proto-oncogene	4.81352	6.26977	1.31271	0.026215		3.85497	6.8138	1.56078	2.64793e-06
MAP1A	microtubule associated protein 1A	0.992987	1.13699	1.0151	0.953627		0.69611	1.16162	1.56054	2.63504e-08
TMEM63A	transmembrane protein 63A	16.5426	20.704	1.06107	0.79379		10.4679	18.2483	1.56038	4.48792e-07
LINC00997	long intergenic non-protein coding RNA 997	1.06064	1.23491	0.987639	0.961233		0.656477	1.17144	1.56025	0.000365347
EPHB2	EPH receptor B2	24.6935	35.8088	1.16696	0.394676		18.5498	33.0718	1.56017	6.71558e-05
ZNF618	zinc finger protein 618	1.37313	1.44169	0.949113	0.800015		0.974452	1.72087	1.56001	0.000111625
C2CD3	C2 calcium dependent domain containing 3	3.91949	4.7528	1.08926	0.571234		2.70037	4.7185	1.55996	4.79687e-09
NFIX	nuclear factor I X	5.47558	7.11973	1.12766	0.494782		3.95763	6.8716	1.55993	1.72037e-08
OSCP1	organic solute carrier partner 1	1.336	1.83217	1.13114	0.529456		1.06645	1.92978	1.55976	0.000323476
FKTN	fukutin	4.7718	6.66561	1.20456	0.0973402		3.54299	6.34099	1.5586	6.17765e-08
C2orf72	chromosome 2 open reading frame 72	11.3847	11.1614	1.02367	0.917338		7.37318	12.7458	1.55817	5.69651e-07
ITGB8	integrin subunit beta 8	5.65285	8.54963	1.26142	0.0710352		4.3409	7.8144	1.558	5.72418e-07
TCF12	transcription factor 12	29.5522	45.342	1.25969	0.0477997		25.1901	45.6386	1.55772	1.26428e-07
SOBP	sine oculis binding protein homolog	0.578329	0.723639	1.04329	0.873189		0.351758	0.626628	1.55758	0.000224898
BBS1	Bardet-Biedl syndrome 1	4.57495	5.41367	1.08911	0.526194		3.48349	5.87643	1.55726	6.20245e-13
UBALD1	UBA like domain containing 1	3.55126	4.91218	1.31393	0.00179994		3.02455	5.16665	1.55705	2.71913e-06
ATP10B	ATPase phospholipid transporting 10B (putative)	27.7754	32.9992	1.12142	0.539428		18.9402	34.1761	1.55682	1.42313e-06
CXCL9	C-X-C motif chemokine ligand 9	1.63523	1.80811	1.11122	0.661732		1.4563	2.81293	1.55566	0.0382882
NPDC1	neural proliferation, differentiation and control, 1	18.6709	19.1512	0.964759	0.893969		9.59096	17.3149	1.55546	0.00021532
SMG7	SMG7, nonsense mediated mRNA decay factor	10.2616	12.2467	1.05394	0.797706		7.04159	12.2174	1.55521	2.1765e-05
CECR1	cat eye syndrome chromosome region, candidate 1	5.91518	7.93098	1.26716	0.0739714		4.63245	7.34721	1.5548	2.43401e-12
ASB9P1	ankyrin repeat and SOCS box containing 9 pseudogene 1	0.366777	0.328024	0.929927	0.778959		0.151421	0.322104	1.55412	0.0467094
ST5	suppression of tumorigenicity 5	9.28162	11.411	1.14906	0.140622		6.91502	11.7288	1.55381	4.78946e-15
CX3CL1	C-X3-C motif chemokine ligand 1	1.11907	1.56963	1.35045	0.046672		1.07115	1.86492	1.55335	0.00182536
OAZ2	ornithine decarboxylase antizyme 2	11.6558	20.1102	1.69842	1.79965e-16		11.4489	19.0501	1.55319	3.55023e-16
OCLM	oculomedin	0.472213	0.628291	1.11275	0.653169		0.336496	0.668507	1.55244	0.0290249
PRCC	papillary renal cell carcinoma (translocation-associated)	9.46453	13.5002	1.31119	0.00701092		7.64157	12.9827	1.55199	3.36881e-18
ATP2B4	ATPase plasma membrane Ca2+ transporting 4	9.11298	10.8945	1.12525	0.156078		6.55309	10.9797	1.55167	4.58553e-15
EGFL6	EGF like domain multiple 6	0.0725389	0.178346	1.30793	0.140622		0.10181	0.207836	1.55163	0.0411563
GPR75	G protein-coupled receptor 75	0.906805	1.01378	1.01476	0.959374		0.552055	1.00012	1.55133	0.00267066
SLC25A29	solute carrier family 25 member 29	5.12303	6.94873	1.18914	0.245736		3.90727	6.88528	1.55114	0.000327643
TTC9	tetratricopeptide repeat domain 9	0.816638	1.02935	1.31041	0.0216878		0.716698	1.19283	1.55083	2.38092e-06
KLHL35	kelch like family member 35	0.381758	0.593423	1.13594	0.57862		0.265107	0.488006	1.55065	0.0323551
MAGED1	MAGE family member D1	20.166	23.8277	1.11955	0.452174		14.7775	24.6643	1.5504	1.05234e-17
METAP1	methionyl aminopeptidase 1	17.0991	27.6805	1.55895	2.32565e-16		15.7257	26.9365	1.5498	6.37277e-19
FOXM1	forkhead box M1	4.10391	5.46326	1.27186	0.0789944		3.56131	6.14655	1.5497	7.72718e-07
LOXL1-AS1	LOXL1 antisense RNA 1	0.708327	1.16133	1.3028	0.117851		0.50707	0.898786	1.54951	0.00400288
KIAA1598	#N/A	6.45193	7.98507	1.1454	0.338623		4.3458	7.76215	1.54942	6.87433e-09
SYT5	synaptotagmin 5	0.340215	0.410324	1.06443	0.813064		0.214792	0.406174	1.54883	0.0212851
FAM188B	family with sequence similarity 188 member B	1.78948	2.45124	1.17729	0.353205		1.56907	2.67781	1.54855	1.84359e-05
SCRG1	stimulator of chondrogenesis 1	0.607036	0.749329	1.00415	0.989944		0.448094	0.865286	1.54849	0.0193031
LOC440602	#N/A	0.00751764	0.0565931	1.24863	0.999875		0.00540586	0.056415	1.54832	0.0350163
SH3PXD2B	SH3 and PX domains 2B	2.15344	3.40097	1.24284	0.136617		1.63419	2.89126	1.54802	2.95981e-05
CIC	capicua transcriptional repressor	4.71991	5.57534	1.1088	0.546856		3.67863	6.14616	1.5477	5.82588e-11
C8orf47	#N/A	7.09167	5.71863	0.829844	0.283441		3.97032	7.19098	1.54751	0.00267218
FMO6P	flavin containing monooxygenase 6 pseudogene	0.599838	0.722561	1.01522	0.960704		0.311291	0.595058	1.54708	0.0258179
KIAA0319	KIAA0319	0.145067	0.0707776	0.695993	0.0416029		0.0452523	0.092324	1.54662	0.0406036
CDK2AP1	cyclin dependent kinase 2 associated protein 1	15.2315	23.4524	1.39636	0.000427037		11.9985	20.5926	1.54645	5.72352e-14
TPPP3	tubulin polymerization promoting protein family member 3	7.08433	9.72184	1.09497	0.708306		5.24879	9.14177	1.54614	0.000106992
NEBL-AS1	NEBL antisense RNA 1	0.162682	0.229314	1.05086	0.999875		0.0139808	0.163919	1.54607	0.0360611
GPR179	G protein-coupled receptor 179	0.102525	0.0955115	0.909628	0.692514		0.0487848	0.0904501	1.54574	0.0277287
PURA	purine rich element binding protein A	12.1572	16.5113	1.33375	0.00119764		9.90877	16.8689	1.54553	3.0054e-14
RNF39	ring finger protein 39	5.34333	7.90962	1.36774	0.00483009		4.40217	7.61092	1.54526	4.53166e-10
ESRP1	epithelial splicing regulatory protein 1	32.8614	39.5127	1.16272	0.330291		21.9381	38.0429	1.54507	2.13535e-17
DNALI1	dynein axonemal light intermediate chain 1	1.88123	2.32371	1.1067	0.585813		1.23151	2.25434	1.54478	0.000135962
GAL3ST4	galactose-3-O-sulfotransferase 4	1.76438	1.78408	0.939326	0.749486		1.16202	2.02082	1.54478	5.02944e-06
ARHGAP23	Rho GTPase activating protein 23	1.0063	1.26073	1.11332	0.596834		0.796466	1.32464	1.54464	1.78669e-06
ZSCAN12P1	zinc finger and SCAN domain containing 12 pseudogene 1	0.732765	1.04884	1.16507	0.443983		0.569774	1.06703	1.54461	0.00337453
SYNGAP1	synaptic Ras GTPase activating protein 1	1.03097	1.29956	1.15274	0.359343		0.770452	1.32678	1.54453	7.25936e-06
TSACC	TSSK6 activating cochaperone	0.700584	0.80942	1.02389	0.935627		0.410171	0.832638	1.5445	0.0443445
DCP1A	decapping mRNA 1A	6.4558	8.91562	1.29343	0.00366323		5.28572	9.15881	1.54389	7.99658e-10
NHS	NHS actin remodeling regulator	1.08827	1.67735	1.18697	0.362152		0.914694	1.6646	1.54358	0.00337984
PRAF2	PRA1 domain family member 2	0.915237	1.27373	1.20731	0.313299		0.612209	1.09365	1.54346	0.0107137
MARK2	microtubule affinity regulating kinase 2	12.0913	14.0252	1.13589	0.435008		8.79282	14.6774	1.54344	3.60625e-16
FAM127B	family with sequence similarity 127 member B	2.73918	3.19436	1.1288	0.534147		2.07952	3.46908	1.54342	1.87314e-05
TPH1	tryptophan hydroxylase 1	11.9687	17.6075	1.12428	0.523387		8.10815	14.7762	1.54331	0.000555317
HEATR2	#N/A	5.23143	6.30083	1.12868	0.473544		3.79914	6.42629	1.54309	2.62533e-09
NOS2	nitric oxide synthase 2	15.3761	16.5908	1.04941	0.862465		9.3663	21.1147	1.54257	0.0425314
ELF5	E74 like ETS transcription factor 5	2.38475	3.10821	1.01745	0.999875		0.104955	2.0823	1.54219	0.0309344
ZNF280C	zinc finger protein 280C	1.60745	2.1975	1.20423	0.108719		1.24137	2.20851	1.54164	4.20068e-07
PCBP2-OT1	PCBP2 overlapping transcript 1	30.1593	38.9284	1.01523	0.957374		22.7246	40.4502	1.54134	0.000696399
KMT2C	lysine methyltransferase 2C	15.9653	17.144	1.02196	0.889482		10.5986	17.994	1.54126	4.06669e-09
PDCD2L	programmed cell death 2-like	2.9726	4.81482	1.35659	0.0171835		2.43807	4.14074	1.54097	8.68388e-05
C19orf55	#N/A	1.15059	1.49815	1.15004	0.481319		0.786313	1.37166	1.54075	0.000474931
NCDN	neurochondrin	2.21668	2.37638	1.02314	0.924563		1.42278	2.42956	1.53988	0.000133773
NT5C1B	5'-nucleotidase, cytosolic IB	0.721357	0.817988	1.05193	0.815421		0.51251	0.887087	1.53948	0.00182536
LRFN4	leucine rich repeat and fibronectin type III domain containing 4	2.33456	4.06232	1.18889	0.421114		1.5565	2.99087	1.53936	0.00877811
CABIN1	calcineurin binding protein 1	10.6453	12.7817	1.10815	0.495103		8.01093	13.6555	1.53898	2.21347e-12
KIAA1522	KIAA1522	20.1258	23.8724	1.17257	0.351114		15.2071	25.2616	1.53892	3.86325e-08
ETV4	ETS variant 4	1.98362	4.72741	1.47309	0.0272542		2.24723	4.43083	1.53873	0.0352138
PCDH17	protocadherin 17	0.663171	0.620472	0.864006	0.388926		0.364649	0.648962	1.53873	0.000864498
TUBBP5	tubulin beta pseudogene 5	0.373722	0.792419	1.47007	0.00887284		0.31058	0.577577	1.53862	0.0062062
ATXN2	ataxin 2	7.8695	8.96552	1.03535	0.830475		5.39607	9.44181	1.53833	2.46937e-09
PIAS3	protein inhibitor of activated STAT 3	3.53395	4.39661	1.1502	0.31337		2.53753	4.30668	1.53727	4.4926e-08
ATXN2L	ataxin 2 like	10.2992	13.7777	1.21479	0.16398		8.10994	13.4882	1.53705	2.95913e-10
KCNJ2	potassium voltage-gated channel subfamily J member 2	2.2906	1.86987	0.986857	0.965967		0.839397	1.59626	1.53687	0.000503635
PPM1L	protein phosphatase, Mg2+/Mn2+ dependent 1L	3.10896	3.23019	0.975243	0.906809		1.9721	3.41946	1.5368	2.07103e-06
SPRY3	sprouty RTK signaling antagonist 3	0.453658	0.405066	0.892613	0.510337		0.243322	0.426746	1.53671	0.000103052
CES1	carboxylesterase 1	10.6083	13.3669	1.19872	0.333177		10.9853	22.8727	1.53666	0.0211685
STK39	serine/threonine kinase 39	27.0278	45.3134	1.37873	0.00657528		23.6562	40.911	1.5361	2.1091e-10
TMEM254	transmembrane protein 254	5.14933	7.57081	1.37589	0.000373708		4.99896	8.20366	1.53606	2.60484e-15
LOC101929295	#N/A	0.315764	0.417775	1.12382	0.597365		0.230154	0.426353	1.53574	0.0212186
TRIB1	tribbles pseudokinase 1	18.5708	28.2436	1.24023	0.194513		15.9169	28.0517	1.53519	7.58515e-05
PRAC2	prostate cancer susceptibility candidate 2	0.633412	0.06002	0.969354	0.580317		0	0.189421	1.5339	0.0252032
KCNJ5	potassium voltage-gated channel subfamily J member 5	0.420367	0.481968	1.01131	0.972363		0.256213	0.446054	1.53386	0.0111248
CACNA1A	calcium voltage-gated channel subunit alpha1 A	0.913367	0.902843	0.870967	0.406423		0.507283	0.891094	1.53351	0.000846378
BEND3	BEN domain containing 3	2.04824	2.58505	1.09515	0.632282		1.43714	2.47487	1.53324	6.20367e-05
SRM	spermidine synthase	5.50956	8.14999	1.2745	0.0643825		4.5325	7.51742	1.53316	0.000149298
RAD51L3-RFFL		13.7749	20.075	1.42497	2.16591e-09		11.8043	19.8115	1.53315	2.71452e-15
ZC3HAV1L	zinc finger CCCH-type containing, antiviral 1 like	3.10139	4.4383	1.17781	0.330677		2.13469	3.73689	1.53271	0.000263363
PTHLH	parathyroid hormone-like hormone	0.223408	0.171284	0.873916	0.553056		0.137399	0.257286	1.53258	0.0301764
TP53INP2	tumor protein p53 inducible nuclear protein 2	14.7423	9.77337	0.90228	0.647135		5.91515	9.65314	1.53231	7.36625e-06
C11orf30	#N/A	4.86781	5.68713	1.12755	0.203979		3.67333	6.22164	1.53195	2.88296e-13
ZSWIM1	zinc finger SWIM-type containing 1	4.49319	5.80999	1.23365	0.0163472		3.61402	6.17111	1.53194	5.88068e-12
OTUB2	OTU deubiquitinase, ubiquitin aldehyde binding 2	1.09601	1.51969	1.16527	0.40679		0.743627	1.32372	1.53173	0.00125418
LDOC1	leucine zipper, down-regulated in cancer 1	0.288074	0.354005	1.10115	0.691989		0.186608	0.38187	1.53151	0.0463621
CD99P1	CD99 molecule pseudogene 1	2.11435	3.01169	1.2058	0.0782216		1.69594	3.01523	1.53129	9.83759e-07
ENTPD2	ectonucleoside triphosphate diphosphohydrolase 2	2.27568	3.026	1.12734	0.562121		1.78309	3.03293	1.53113	0.000517226
DROSHA	drosha ribonuclease III	9.11441	10.3067	1.01091	0.955893		5.58516	9.731	1.53105	5.38039e-08
ZNF827	zinc finger protein 827	5.80608	6.63784	1.07951	0.536291		4.39744	7.45735	1.53076	3.17501e-12
DCAKD	dephospho-CoA kinase domain containing	5.84616	8.35255	1.35764	8.49839e-08		4.88659	8.05208	1.53076	1.22813e-08
SLAMF8	SLAM family member 8	2.05442	2.69132	1.31548	0.031777		1.55867	2.64163	1.52873	2.92798e-06
MFAP4	microfibrillar associated protein 4	19.7981	27.8216	1.32833	0.0486798		17.7694	29.5609	1.52827	8.86608e-06
HS3ST1	heparan sulfate-glucosamine 3-sulfotransferase 1	2.86479	6.4335	1.32034	0.128746		2.50998	4.7192	1.52775	0.00345559
FBRS	fibrosin	8.26063	10.3515	1.18803	0.235176		6.38995	10.5167	1.52773	7.20525e-11
IGFBPL1	insulin like growth factor binding protein like 1	0.470731	0.682665	1.27806	0.182756		0.370821	0.649194	1.52771	0.00579105
PDE4A	phosphodiesterase 4A	0.945505	0.93494	0.960251	0.874667		0.523654	0.861988	1.52752	3.12949e-05
RFFL	ring finger and FYVE-like domain containing E3 ubiquitin protein ligase	15.2858	21.3875	1.37381	1.085e-06		12.9005	21.4913	1.52694	1.46285e-16
PSAT1	phosphoserine aminotransferase 1	2.24277	3.91874	1.41187	0.0277672		1.50163	2.62144	1.52651	0.00574226
MAP2	microtubule associated protein 2	0.267192	0.264211	0.92506	0.740038		0.1855	0.3165	1.52595	0.00376146
ALDH3A1	aldehyde dehydrogenase 3 family member A1	3.28312	8.35084	1.4125	0.029447		4.30493	8.04033	1.52515	0.0014263
ARHGEF10L	Rho guanine nucleotide exchange factor 10 like	14.4147	16.01	1.03449	0.889482		9.32381	16.031	1.52455	3.25057e-05
TDO2	tryptophan 2,3-dioxygenase	4.34059	5.29094	1.14077	0.530238		3.18703	5.89259	1.52427	0.00354422
FAM65A	family with sequence similarity 65 member A	2.20904	2.38938	1.05372	0.774368		1.49194	2.42397	1.5241	2.74688e-06
ASRGL1	asparaginase like 1	4.1568	4.59182	1.0376	0.88994		2.24208	3.79672	1.52378	7.46842e-06
GPC3	glypican 3	0.562314	0.675781	1.05934	0.818428		0.463224	0.857205	1.52358	0.00502886
ADIPOQ	adiponectin, C1Q and collagen domain containing	0.00726024	0.0275539	1.0482	0.999875		0.00393934	0.0259725	1.52351	0.0491607
SF3A1	splicing factor 3a subunit 1	15.8244	18.6638	1.05503	0.773444		11.4813	19.411	1.52344	6.30089e-12
GRHL3	grainyhead like transcription factor 3	0.600927	0.865027	1.30769	0.126772		0.530871	0.901513	1.52319	0.00402354
SLC38A7	solute carrier family 38 member 7	2.23407	2.9052	1.17824	0.256386		1.8101	3.07426	1.52282	1.12914e-06
CYB5RL	cytochrome b5 reductase like	1.51403	2.02085	1.17988	0.212933		1.01614	1.77387	1.52275	0.000146399
PTPN23	protein tyrosine phosphatase, non-receptor type 23	4.7897	5.52827	1.07046	0.731182		3.40897	5.51945	1.52242	5.8171e-08
KCNB2	potassium voltage-gated channel subfamily B member 2	0.808909	0.853664	1.00505	0.987817		0.493054	0.889366	1.52183	0.00235303
PALM2	paralemmin 2	0.379051	0.502635	1.10283	0.651896		0.323458	0.562627	1.52173	0.000482121
DNAAF1	dynein (axonemal) assembly factor 1	0.206629	0.378869	1.44405	0.0293108		0.148964	0.273442	1.52127	0.0445508
PLAGL1	PLAG1 like zinc finger 1	2.70423	2.21791	0.873743	0.500592		1.44463	2.43441	1.52116	2.81985e-06
RELA	RELA proto-oncogene, NF-kB subunit	12.3825	16.5449	1.2245	0.0990199		10.3027	17.0847	1.52092	5.08129e-11
CLDN20	claudin 20	2.00655	1.68939	0.85224	0.397185		1.07741	1.87708	1.5207	0.00438716
RAD54B	RAD54 homolog B (S. cerevisiae)	1.73829	2.65738	1.20061	0.254062		1.34571	2.41344	1.52043	0.000735219
FAM71F2	family with sequence similarity 71 member F2	0.546115	0.577172	1.00605	0.986287		0.317366	0.585193	1.5204	0.0254762
SGSM1	small G protein signaling modulator 1	0.571543	0.446449	0.919106	0.729924		0.272872	0.474543	1.52026	0.00235
AQP5	aquaporin 5	10.5074	10.907	1.0031	0.989812		0.306988	13.1251	1.51999	0.0312425
CIT	citron rho-interacting serine/threonine kinase	2.35626	2.65249	1.01675	0.936788		1.78221	3.08011	1.51996	2.78941e-06
B3GNT9	UDP-GlcNAc:betaGal beta-1,3-N-acetylglucosaminyltransferase 9	4.12052	5.45353	1.23322	0.0355223		3.18663	5.42165	1.51984	8.53848e-07
ZNF592	zinc finger protein 592	7.14041	8.53136	1.13957	0.257304		5.25383	8.78258	1.51937	1.13343e-16
ABCC1	ATP binding cassette subfamily C member 1	5.21361	7.5701	1.14769	0.412265		3.80036	6.53143	1.51928	2.50705e-05
CELF2-AS2	CELF2 antisense RNA 2	0.874932	0.74261	0.924765	0.760107		0.301482	0.605671	1.51871	0.0488769
SH3TC2	SH3 domain and tetratricopeptide repeats 2	0.0633817	0.205198	1.29926	0.165732		0.0454626	0.0808399	1.5183	0.0120255
BPIFB1	BPI fold containing family B member 1	9.49883	55.9105	1.16192	0.273019		0.0823915	58.7728	1.51807	0.0282948
LSM12	LSM12 homolog	0.963196	1.64867	1.47092	0.000816144		0.916282	1.54776	1.51795	4.28356e-05
SAMD12	sterile alpha motif domain containing 12	4.55357	5.78446	1.07664	0.673359		3.16518	5.65291	1.51749	8.08324e-05
TMEM75	transmembrane protein 75	0.365903	0.514544	1.08092	0.761239		0.226407	0.436609	1.51743	0.0358491
LOC100507462	#N/A	0.128687	0.184631	1.19375	0.402279		0.111124	0.215404	1.51675	0.0487311
DNAH6	dynein axonemal heavy chain 6	0.430769	0.464184	0.961469	0.87644		0.220498	0.362865	1.51663	0.0260386
SSC5D	scavenger receptor cysteine rich family member with 5 domains	0.385361	0.440037	0.954291	0.854018		0.272075	0.432262	1.51658	0.00160385
CANT1	calcium activated nucleotidase 1	29.9668	37.2254	1.1714	0.386948		19.8898	32.8761	1.5163	5.7238e-09
SUFU	SUFU negative regulator of hedgehog signaling	1.46676	1.65086	1.00836	0.972653		1.00768	1.67829	1.51604	6.94831e-05
AZGP1	alpha-2-glycoprotein 1, zinc-binding	22.1738	42.9148	1.57534	0.000662785		20.4036	36.109	1.51585	8.07187e-05
PRKAA2	protein kinase AMP-activated catalytic subunit alpha 2	0.393188	0.3572	0.904734	0.681396		0.213295	0.385486	1.51574	0.00774425
DLEU2L	deleted in lymphocytic leukemia 2-like	0.539674	0.481915	0.895362	0.61429		0.275106	0.497524	1.51555	0.037559
LINC00641	long intergenic non-protein coding RNA 641	2.60362	3.0208	1.09575	0.481319		1.85487	3.07026	1.51507	1.89898e-06
PODXL2	podocalyxin like 2	6.94441	10.1955	1.21368	0.1998		5.42054	8.58491	1.51439	1.96947e-06
PNMA2	paraneoplastic Ma antigen 2	0.444357	0.518842	1.03395	0.873317		0.312317	0.526467	1.51408	0.00231315
TTBK1	tau tubulin kinase 1	0.53477	1.26129	1.5602	0.00592723		0.538228	0.965889	1.51403	0.0154842
GP1BB	glycoprotein Ib platelet beta subunit	0.714686	0.658488	0.935752	0.79979		0.412308	0.749605	1.51403	0.0453547
ZKSCAN8	zinc finger with KRAB and SCAN domains 8	5.7249	6.6193	1.05701	0.611613		3.89686	6.56893	1.51349	1.33768e-06
SLC29A1	solute carrier family 29 member 1 (Augustine blood group)	3.74624	4.96094	1.13318	0.500061		2.83338	4.82707	1.51149	2.01715e-05
STIL	SCL/TAL1 interrupting locus	3.34942	4.79785	1.28995	0.0789943		2.84472	4.7873	1.51096	8.71875e-08
WIZ	widely interspaced zinc finger motifs	3.21939	4.00453	1.12658	0.489053		2.46976	4.14852	1.51047	3.79931e-09
SLC18A1	solute carrier family 18 member A1	1.02477	1.61072	1.17726	0.326053		0.634547	1.0594	1.51031	0.00657888
FANK1	fibronectin type III and ankyrin repeat domains 1	2.10361	2.26026	0.969929	0.903146		1.24247	2.2033	1.51013	0.00363696
QSER1	glutamine and serine rich 1	7.50002	8.86889	1.0517	0.73859		4.93287	8.36779	1.51001	3.84309e-07
LRRC2	leucine rich repeat containing 2	0.494291	0.519736	0.917602	0.698471		0.268114	0.461179	1.50993	0.00542629
POU2F1	POU class 2 homeobox 1	3.61953	4.08394	1.07653	0.486274		2.58107	4.37089	1.50988	8.7108e-09
MIR181A2HG	MIR181A2 host gene	1.82809	1.34485	0.75826	0.118374		0.826477	1.59738	1.50984	0.0310776
LOC100131289	#N/A	1.40098	2.10934	1.16756	0.481319		1.01279	1.83052	1.50961	0.0266418
SMCR5	Smith-Magenis syndrome chromosome region, candidate 5 (non-protein coding)	0.306629	0.32447	0.945631	0.835784		0.207994	0.373197	1.50945	0.0231853
CSNK1A1P1	casein kinase 1 alpha 1 pseudogene 1	0.448096	0.461852	0.996902	0.9926		0.380504	0.674405	1.50939	0.0347575
WASF1	WAS protein family member 1	0.350485	0.548753	1.33542	0.0564874		0.287238	0.491152	1.50924	0.0063355
FZD3	frizzled class receptor 3	1.82564	2.63674	1.2177	0.0579523		1.31198	2.23461	1.50911	3.43994e-07
MMGT1	membrane magnesium transporter 1	10.5009	15.916	1.42043	1.60357e-06		8.76666	14.6732	1.50904	1.25088e-15
HES5	hes family bHLH transcription factor 5	0.631263	0.87359	1.18098	0.431809		0.542604	0.966426	1.50902	0.0181176
ZBED3	zinc finger BED-type containing 3	1.9895	2.14367	0.968541	0.905846		1.35252	2.16206	1.50818	0.00310009
C21orf62	chromosome 21 open reading frame 62	0.196047	0.190474	0.917599	0.701807		0.107214	0.201725	1.50809	0.0374647
C1orf186	chromosome 1 open reading frame 186	1.54784	1.99323	1.16725	0.425369		1.30797	2.2511	1.5073	0.000887438
CASP2	caspase 2	5.49806	6.69983	1.13668	0.334517		4.03117	6.70349	1.50597	1.30439e-10
TMTC2	transmembrane and tetratricopeptide repeat containing 2	4.96029	5.64595	0.985977	0.953062		3.15109	5.46531	1.50568	7.41091e-06
CACNA1D	calcium voltage-gated channel subunit alpha1 D	3.15916	3.65639	1.0133	0.955723		2.0131	3.45229	1.50548	5.54631e-05
SKAP2	src kinase associated phosphoprotein 2	13.8376	18.1926	1.24331	0.0129688		10.0495	16.7204	1.5054	5.15492e-13
C8orf37	chromosome 8 open reading frame 37	0.770764	0.816959	0.955759	0.823855		0.544067	0.92641	1.50531	0.000532314
AMER3	APC membrane recruitment protein 3	0.530939	0.602451	1.03556	0.889912		0.301396	0.528317	1.50528	0.0121199
BRD4	bromodomain containing 4	5.0543	5.64581	1.04458	0.820558		3.51056	5.8156	1.50521	4.88969e-10
UBAP2L	ubiquitin associated protein 2 like	12.7097	16.6799	1.16681	0.175721		9.84697	16.4128	1.50519	9.38652e-12
HIVEP1	human immunodeficiency virus type I enhancer binding protein 1	8.16718	8.49345	0.980607	0.921081		5.46051	9.15937	1.50486	3.98524e-09
BSCL2	BSCL2, seipin lipid droplet biogenesis associated	9.29881	12.2526	1.21395	0.089522		7.07834	11.5745	1.50485	3.97268e-13
CHAC1	ChaC glutathione specific gamma-glutamylcyclotransferase 1	1.22216	1.50288	1.19851	0.266276		0.890032	1.62406	1.50477	0.0143238
ZMYM3	zinc finger MYM-type containing 3	3.28148	3.92355	1.10348	0.409301		2.50809	4.14272	1.50442	5.5742e-11
MARK4	microtubule affinity regulating kinase 4	1.69624	2.12109	1.17975	0.0851259		1.36085	2.24687	1.50415	5.26657e-07
CD276	CD276 molecule	4.88462	6.31267	1.14462	0.424576		3.9984	6.66938	1.50403	1.42015e-08
SPATA6L	spermatogenesis associated 6 like	2.45584	3.16235	1.11167	0.426542		1.50753	2.6274	1.50391	0.000169731
ITLN1	intelectin 1	339.177	440.891	1.19456	0.400222		185.629	370.013	1.50326	0.00213847
LOC727751	#N/A	2.40438	2.94512	1.10016	0.57172		2.05957	3.46541	1.50326	8.22679e-08
ZNF585B	zinc finger protein 585B	2.56805	3.34527	1.23747	0.00182475		2.03261	3.48607	1.50298	1.7104e-07
IPW	#N/A	0.858278	0.807757	0.914694	0.630113		0.487033	0.846943	1.50281	0.0038422
VANGL1	VANGL planar cell polarity protein 1	4.01765	5.25621	1.14338	0.40035		2.659	4.50265	1.50168	5.66003e-06
CHADL	chondroadherin like	0.871619	1.53526	1.24484	0.20803		0.720018	1.24959	1.50157	0.00473593
RAD21	RAD21 cohesin complex component	36.4192	54.037	1.47168	2.59461e-08		32.1643	52.7784	1.50146	6.19431e-12
CC2D1A	coiled-coil and C2 domain containing 1A	18.55	24.3236	1.24478	0.0352667		16.2992	26.3481	1.50138	1.9342e-22
PHLDA3	pleckstrin homology like domain family A member 3	2.12222	3.88005	1.27638	0.195712		1.65153	2.90625	1.50137	0.00918339
SERINC2	serine incorporator 2	23.6446	29.3459	1.25787	0.0792164		21.86	35.6684	1.50137	5.40876e-08
AC093391.2	#N/A	1.6203	2.82496	1.47924	0.00322643		1.519	2.46295	1.50123	0.00172217
SRGAP1	SLIT-ROBO Rho GTPase activating protein 1	3.17081	2.88064	0.933323	0.733934		1.81505	3.0759	1.501	7.72427e-05
HOXB9	homeobox B9	3.0579	0.989738	0.923371	0.532822		0.0163108	0.353237	1.50087	0.0395433
CLU	clusterin	43.4349	53.9002	1.10943	0.642477		31.4422	57.8906	1.50023	0.00148415
LGALS12	galectin 12	0.253059	0.366548	1.22135	0.318104		0.170034	0.320272	1.49993	0.0411456
SRGAP2B	SLIT-ROBO Rho GTPase activating protein 2B	0.634549	0.426506	0.803539	0.263256		0.641239	0.444738	0.667121	0.0155762
PBDC1	polysaccharide biosynthesis domain containing 1	18.3622	13.2894	0.763633	0.0226741		19.2803	13.8637	0.666909	6.07391e-11
S100A14	S100 calcium binding protein A14	139.21	130.856	0.970506	0.865294		187.187	127.415	0.666867	3.237e-05
APLP2	amyloid beta precursor like protein 2	182.51	131.759	0.761043	0.00379658		201.959	143.141	0.66654	1.77996e-08
DGAT2	diacylglycerol O-acyltransferase 2	20.347	15.2561	0.930048	0.766026		29.9217	21.2592	0.666344	0.0002175
TPTE2P1	transmembrane phosphoinositide 3-phosphatase and tensin homolog 2 pseudogene 1	0.511381	0.332225	0.68871	0.0125525		0.434341	0.292482	0.6663	0.0121261
RPSAP9	ribosomal protein SA pseudogene 9	0.912157	0.686999	0.866255	0.516991		0.913619	0.596275	0.666003	0.0115405
HLA-G	major histocompatibility complex, class I, G	5.89568	3.61908	0.792538	0.215624		5.11067	3.11975	0.665889	0.0146795
POLR3GL	polymerase (RNA) III subunit G like	14.8216	12.1326	0.854191	0.273037		16.0442	11.181	0.665431	4.27262e-06
FAM132A	family with sequence similarity 132 member A	8.07266	5.50393	0.834334	0.365173		10.9649	7.51726	0.664455	0.000132455
APOC4-APOC2	APOC4-APOC2 readthrough (NMD candidate)	30.8231	25.5978	0.974118	0.927322		45.9048	31.6957	0.664295	0.000681646
SULT1A2	sulfotransferase family 1A member 2	27.0036	20.5608	0.871276	0.517775		34.2328	22.8553	0.66419	0.000629396
FAM50A	family with sequence similarity 50 member A	25.1638	21.8427	0.871851	0.148573		28.1568	19.9495	0.664183	2.05542e-07
MOGAT3	monoacylglycerol O-acyltransferase 3	18.9119	15.8408	0.927563	0.703732		25.8917	17.9797	0.664044	0.000135226
EDF1	endothelial differentiation related factor 1	286.255	247.458	0.915755	0.556044		348.168	244.572	0.664036	3.83543e-07
ACSL5	acyl-CoA synthetase long-chain family member 5	413.105	373.731	1.00095	0.99752		530.371	373.563	0.663941	8.91605e-06
SNRPA1	small nuclear ribonucleoprotein polypeptide A'	8.03687	6.51545	0.787448	0.022277		8.8026	6.10385	0.663815	0.000226205
APOC2	apolipoprotein C2	77.1727	64.0392	0.973671	0.92625		114.911	79.2303	0.663475	0.000650934
CHMP4B	charged multivesicular body protein 4B	58.6683	43.696	0.741526	7.8453e-06		57.2321	40.4535	0.663452	2.75614e-16
CDR2	cerebellar degeneration related protein 2	21.3327	19.1477	0.957796	0.755472		25.9212	18.0193	0.663086	1.38724e-08
AP3S1	adaptor related protein complex 3 sigma 1 subunit	45.0079	42.5877	0.962038	0.833435		53.8601	37.9013	0.66298	1.23151e-07
CD3D	CD3d molecule	16.961	16.4186	1.03251	0.909081		21.6476	14.4847	0.66289	0.00032843
U2AF1	U2 small nuclear RNA auxiliary factor 1	5.63852	4.4177	0.737084	0.00182004		5.26563	3.67449	0.662811	5.1712e-05
TRPM6	transient receptor potential cation channel subfamily M member 6	15.181	6.66657	0.650119	0.00493833		12.8296	8.99913	0.662774	3.93118e-05
MYO15B	myosin XVB	54.1854	37.7966	0.789108	0.111738		63.8994	45.8612	0.661584	6.21365e-05
CCDC13	coiled-coil domain containing 13	0.952869	0.368828	0.637393	0.00723245		0.503462	0.317723	0.661434	0.0155587
SLC19A1	solute carrier family 19 member 1	13.5284	11.3547	0.955249	0.864423		22.506	16.0764	0.66111	0.000956806
TRMT61B	tRNA methyltransferase 61B	11.9794	11.8549	1.02991	0.886004		14.7829	10.2066	0.660978	1.27845e-08
GOLGA4	golgin A4	71.4661	50.5697	0.721383	0.000364371		74.1826	53.3595	0.660836	1.10062e-12
MAOB	monoamine oxidase B	47.0115	37.1495	0.891512	0.604151		55.3231	37.5546	0.66083	1.09428e-05
SH3D21	SH3 domain containing 21	10.8904	8.74957	0.836356	0.182474		14.4659	10.5191	0.660804	0.000149154
LACC1	laccase domain containing 1	7.43523	6.26505	0.855996	0.128507		8.33702	6.01498	0.660593	6.44376e-12
UBXN2A	UBX domain protein 2A	13.1559	12.6805	0.984132	0.941385		17.0427	12.1698	0.660227	3.95723e-12
OAT	ornithine aminotransferase	542.612	496.868	1.00144	0.997013		791.341	548.516	0.660206	6.22188e-05
PRKCD	protein kinase C delta	19.8728	13.6436	0.702524	0.00282185		18.9793	13.1419	0.660103	9.44756e-05
RETSAT	retinol saturase	108.992	86.6523	0.892482	0.479612		140.512	98.6067	0.659978	2.97697e-06
FLJ44511	#N/A	0.869577	0.637784	0.893282	0.535388		0.831131	0.557906	0.659596	0.000579611
ARL14	ADP ribosylation factor like GTPase 14	53.2117	51.4907	1.00781	0.977617		74.7271	50.8672	0.659514	0.000718165
LTB	lymphotoxin beta	7.35015	4.82446	0.790494	0.208503		5.24081	3.58871	0.659346	0.00579648
CCDC68	coiled-coil domain containing 68	24.4817	17.9108	0.792536	0.0499356		28.4876	19.9265	0.659159	3.86325e-08
BTNL3	butyrophilin like 3	40.5272	33.0122	0.871963	0.431294		63.1971	43.2969	0.658788	7.24543e-06
NPR3	natriuretic peptide receptor 3	0.487756	0.241748	0.72294	0.0783714		0.457673	0.313609	0.658305	0.00693242
PDZK1	PDZ domain containing 1	18.0326	13.3697	0.884224	0.586394		22.9133	15.9878	0.658132	6.21465e-06
PDE3A	phosphodiesterase 3A	7.29778	3.76755	0.801206	0.259412		4.84542	3.32342	0.65785	0.00462847
CFDP1	craniofacial development protein 1	45.9515	35.5135	0.813664	0.106436		49.1347	34.8544	0.657452	6.16875e-06
TRPV3	transient receptor potential cation channel subfamily V member 3	3.91262	2.60647	0.780514	0.124509		3.89778	2.84245	0.657428	0.000216577
NAGS	N-acetylglutamate synthase	18.3644	15.0278	0.924105	0.728193		25.4028	17.6068	0.656812	1.92988e-05
NABP1	nucleic acid binding protein 1	17.1791	14.1026	0.880514	0.490932		20.1584	13.9381	0.656777	7.05807e-06
HLA-DRB6	major histocompatibility complex, class II, DR beta 6 (pseudogene)	30.7338	34.1829	1.07126	0.785195		47.1746	34.3971	0.656672	1.87873e-05
UGT2B17	UDP glucuronosyltransferase family 2 member B17	254.974	205.425	0.910685	0.686502		277.009	183.776	0.656585	0.000231117
CCDC102B	coiled-coil domain containing 102B	4.63995	2.23391	0.654696	0.0101853		4.40076	3.0159	0.656576	0.00130566
APOE	apolipoprotein E	32.1589	19.3922	0.675197	0.000837195		32.9939	21.8518	0.655611	0.000553156
ETV2	ETS variant 2	0.937805	0.751946	0.888961	0.580186		1.10166	0.727255	0.655448	0.00831886
PSMB9	proteasome subunit beta 9	43.9477	32.8942	0.834016	0.325303		59.817	41.3389	0.655408	4.16191e-07
OTOP3	otopetrin 3	53.1855	37.8339	0.900326	0.652335		79.9933	52.7263	0.655246	0.000686436
LOC100505984	#N/A	0.944225	0.738374	0.923472	0.754638		1.54018	0.91019	0.655236	0.0348351
SOWAHD	sosondowah ankyrin repeat domain family member D	1.83868	1.37014	0.842661	0.32504		1.97627	1.33852	0.655213	0.000110782
STK17B	serine/threonine kinase 17b	46.9279	37.0632	0.882406	0.481319		59.5253	40.6879	0.655134	8.51141e-06
SERPINE2	serpin family E member 2	15.6432	12.4753	0.856518	0.356225		21.1978	14.8164	0.655021	4.4775e-06
CYB5A	cytochrome b5 type A	223.568	203.823	0.99604	0.989372		306.6	213.599	0.654657	3.3963e-08
OIT3	oncoprotein induced transcript 3	6.19651	4.77876	0.890583	0.617408		7.71086	5.38421	0.654414	0.000401346
PDLIM2	PDZ and LIM domain 2	5.48555	4.41656	0.894187	0.536154		7.20015	4.90865	0.654271	7.46842e-06
CRTAM	cytotoxic and regulatory T-cell molecule	0.786332	0.679494	0.941779	0.822841		1.06392	0.673642	0.654064	0.0202665
HIST1H4H	histone cluster 1, H4h	144.048	114.354	0.861927	0.0909912		163.148	111.237	0.653865	5.37777e-05
PLIN2	perilipin 2	147.419	148.874	1.04927	0.858209		205.867	147.186	0.653704	2.01734e-05
GATA6-AS1	GATA6 antisense RNA 1 (head to head)	6.23954	5.10494	0.886716	0.527413		7.09882	4.82432	0.653493	4.88993e-07
SLC9A3	solute carrier family 9 member A3	40.4235	27.7128	0.776472	0.0759628		48.3477	33.1965	0.652263	1.08788e-08
BCHE	butyrylcholinesterase	2.92996	2.3422	0.890758	0.604438		2.9998	1.99313	0.652246	0.00162118
KLRD1	killer cell lectin like receptor D1	1.7508	1.75295	0.949436	0.848383		2.6434	1.81565	0.652085	0.00190578
BCMO1	#N/A	9.2643	8.80048	0.962549	0.869975		13.8238	8.3127	0.652041	0.00270114
CLRN3	clarin 3	73.9062	75.5447	1.06597	0.714257		101.491	69.7849	0.652017	1.03222e-10
PMM1	phosphomannomutase 1	21.2913	17.178	0.827109	0.148197		25.9282	16.981	0.651769	4.62939e-06
ENO3	enolase 3	2.56873	2.27692	0.970758	0.89868		3.53772	2.39872	0.651248	2.13046e-05
HRASLS2	HRAS like suppressor 2	50.1688	42.3593	0.943318	0.82793		82.0813	52.5846	0.650831	0.0106396
ADA	adenosine deaminase	342.38	207.654	0.869903	0.511869		398.69	251.126	0.650784	0.010315
SLC46A3	solute carrier family 46 member 3	43.6727	39.3663	0.956481	0.85176		56.767	38.8568	0.65074	2.31929e-05
HLA-A	major histocompatibility complex, class I, A	780.992	662.315	0.876116	0.326654		962.183	640.279	0.650578	1.00577e-06
COMTD1	catechol-O-methyltransferase domain containing 1	24.9415	20.5415	0.91602	0.554554		31.2954	20.5413	0.650329	6.57967e-06
CDKN2B-AS1	CDKN2B antisense RNA 1	2.57263	0.527158	0.667071	0.0198604		0.805324	0.51729	0.649985	0.00379548
CSMD3	CUB and Sushi multiple domains 3	0.107276	0.0669425	0.837708	0.407208		0.118368	0.0749937	0.649833	0.0143238
TAAR3	trace amine associated receptor 3 (gene/pseudogene)	1.31584	1.31134	1.01413	0.964406		1.65979	1.08963	0.649628	0.00589832
GCLM	glutamate-cysteine ligase modifier subunit	20.5083	20.1167	1.00076	0.998261		26.6741	18.1574	0.649567	0.000124439
TSSK6	testis specific serine kinase 6	1.26186	0.995667	0.789933	0.116512		1.37898	0.879473	0.649492	0.00124021
DDO	D-aspartate oxidase	6.08001	5.79852	1.00144	0.99688		7.5811	5.12201	0.649427	4.46688e-05
NOX4	NADPH oxidase 4	0.107803	0.0855679	0.904036	0.678982		0.171322	0.103699	0.648691	0.0275009
CD244	CD244 molecule	2.52615	2.12686	0.927595	0.746081		3.50651	2.27265	0.64851	0.000153856
FUOM	fucose mutarotase	43.3305	36.8522	0.957411	0.858034		59.2197	39.4346	0.648369	4.29091e-07
DEPDC7	DEP domain containing 7	15.3325	15.1101	1.01607	0.951212		23.3404	16.202	0.648063	4.90546e-08
KCNJ8	potassium voltage-gated channel subfamily J member 8	2.24155	1.86128	0.940965	0.818339		2.91262	2.0281	0.647794	2.76096e-05
KLRC4	killer cell lectin like receptor C4	2.3692	2.05953	0.988911	0.969346		2.95676	1.89495	0.647753	0.00258552
UGT2B11	UDP glucuronosyltransferase family 2 member B11	0.748364	0.52893	0.887486	0.606681		1.24561	0.560035	0.647353	0.0358464
AKR7A3	aldo-keto reductase family 7 member A3	242.625	203.738	0.95958	0.872195		347.332	228.563	0.647118	1.69808e-05
SLC2A9	solute carrier family 2 member 9	8.20941	6.41088	0.900716	0.637136		9.06806	6.32723	0.64697	6.90748e-10
MPP1	membrane palmitoylated protein 1	53.8573	45.2808	0.953014	0.85895		77.7992	54.1785	0.646828	1.13338e-05
VAMP5	vesicle associated membrane protein 5	4.93575	4.09768	0.886342	0.53929		6.25845	4.14431	0.646671	1.72912e-05
GGT8P	gamma-glutamyltransferase 8 pseudogene	1.76141	0.888198	0.665904	0.0133131		1.79889	1.2415	0.646589	0.00207251
WNT5B	Wnt family member 5B	3.02059	2.23649	0.83505	0.299511		3.47436	2.32807	0.646421	4.53501e-06
SUGCT	succinyl-CoA:glutarate-CoA transferase	1.50536	0.82123	0.816306	0.32863		0.912557	0.578839	0.646411	0.00471307
QDPR	quinoid dihydropteridine reductase	8.88619	8.49005	0.873372	0.314133		11.5713	7.95817	0.646253	0.000337389
TMPRSS6	transmembrane protease, serine 6	1.51616	1.10297	0.831325	0.360285		1.93992	1.24093	0.646148	0.0028987
MYO1G	myosin IG	3.3794	2.61501	0.832422	0.283525		3.89007	2.63256	0.645572	1.30025e-05
RP11-451G4.2	0	6.04193	3.95217	0.853044	0.463668		6.98977	4.56972	0.645447	0.00411316
COLEC11	collectin subfamily member 11	1.74788	1.22182	0.87491	0.55906		2.04874	1.33221	0.645369	0.000734879
FBP1	fructose-bisphosphatase 1	173.418	127.035	0.883025	0.570969		213.498	141.766	0.645355	1.8507e-05
FAM3C	family with sequence similarity 3 member C	24.7494	18.9909	0.876431	0.520935		30.9346	21.5426	0.644978	2.46172e-05
NBPF25P	neuroblastoma breakpoint family member 25, pseudogene	0.2937	0.214654	0.795323	0.203766		0.293184	0.189385	0.644788	0.00859
F11	coagulation factor XI	9.84291	6.64512	0.878522	0.560525		11.7513	7.99524	0.64477	6.32274e-09
RHOD	ras homolog family member D	8.89763	8.37459	0.965608	0.877032		14.8284	9.43303	0.644504	0.000813629
LCN15	lipocalin 15	6.04644	3.98402	0.829101	0.362745		6.48443	4.2659	0.644273	0.00189216
PLIN3	perilipin 3	47.735	37.7189	0.88623	0.466729		62.9978	42.1246	0.643972	3.65335e-08
PANK1	pantothenate kinase 1	11.7887	8.86757	0.819765	0.118069		15.0072	10.3329	0.643961	9.64959e-11
CLDN5	claudin 5	3.32594	3.1486	0.959212	0.863084		3.81231	2.56608	0.643793	0.000544766
SCARNA17	small Cajal body-specific RNA 17	65.0374	45.1777	0.735968	0.0238779		60.4686	39.9811	0.643779	0.000418683
XDH	xanthine dehydrogenase	44.8109	33.5414	0.868829	0.447693		60.1252	40.0716	0.643764	3.27933e-05
OSGIN1	oxidative stress induced growth inhibitor 1	11.3906	9.27685	0.908963	0.66591		17.3219	11.5558	0.643761	0.000440696
AKR1B15	aldo-keto reductase family 1 member B15	9.00918	9.17739	1.14067	0.536576		18.5532	12.8716	0.643727	0.000597783
HCG27	HLA complex group 27 (non-protein coding)	2.57963	1.69303	0.744585	0.0382013		1.97251	1.37918	0.64233	8.53692e-05
CLRN1-AS1	CLRN1 antisense RNA 1 conserved region	0.0761992	0.0710781	0.996756	0.999875		0.207539	0.10858	0.642328	0.0489393
KLRF1	killer cell lectin like receptor F1	0.703941	0.549633	0.808691	0.258526		0.67982	0.389214	0.642019	0.0329138
HNF4A-AS1	HNF4A antisense RNA 1	5.55984	3.86164	0.814067	0.181146		6.32651	4.07419	0.641918	0.000368646
RAB24	RAB24, member RAS oncogene family	12.0492	8.83217	0.771642	0.020142		11.7394	7.86056	0.641844	4.61138e-11
VMO1	vitelline membrane outer layer 1 homolog	2.99732	2.40774	0.916349	0.690568		3.69022	2.45294	0.64177	0.00046677
ITGAE	integrin subunit alpha E	7.63956	7.10001	0.98688	0.961884		10.2776	6.80854	0.641478	7.15323e-06
FST	follistatin	0.630128	0.945654	1.24847	0.24711		0.887138	0.531045	0.641317	0.0261033
GSTA1	glutathione S-transferase alpha 1	354.245	357.986	1.0315	0.914713		459.383	281.88	0.640741	0.00580222
ATP8B2	ATPase phospholipid transporting 8B2	13.5073	9.57772	0.847832	0.418809		17.1277	11.6926	0.640716	0.000195478
DOHH	deoxyhypusine hydroxylase/monooxygenase	7.16801	5.36952	0.806933	0.101399		8.2314	5.66738	0.640539	1.2715e-08
LEAP2	liver expressed antimicrobial peptide 2	16.7939	16.3099	1.02755	0.925037		22.9007	15.0157	0.639483	0.000530518
LGALS3	galectin 3	268.213	242.481	0.954119	0.82952		319.772	210.42	0.638966	2.03186e-07
MRO	maestro	5.18491	4.22851	0.939419	0.807061		5.8167	3.95367	0.638783	2.53544e-06
ANO4	anoctamin 4	0.450051	0.337261	0.87252	0.54932		0.604889	0.380954	0.63765	0.0019689
MYO1A	myosin IA	281.013	206.853	0.842601	0.361555		355.896	235.777	0.637606	8.22659e-05
LCK	LCK proto-oncogene, Src family tyrosine kinase	8.93698	7.45827	0.924464	0.736298		10.8573	7.01697	0.637318	4.68851e-05
LPGAT1	lysophosphatidylglycerol acyltransferase 1	32.7511	27.3314	0.917022	0.63665		46.1761	31.3956	0.637002	7.43998e-07
NPHP3-ACAD11	NPHP3-ACAD11 readthrough (NMD candidate)	14.1358	11.5077	0.903433	0.567012		17.5708	12.2436	0.636767	1.97838e-08
FRMD1	FERM domain containing 1	2.17179	1.08021	0.662904	0.0155237		2.26092	1.50984	0.636751	0.000347894
CYP2C9	cytochrome P450 family 2 subfamily C member 9	92.8833	74.7826	0.938973	0.808546		113.726	76.891	0.636518	2.08765e-05
SIGLEC12	sialic acid binding Ig like lectin 12 (gene/pseudogene)	3.62721	2.95313	0.911803	0.69921		5.21237	3.61866	0.636281	4.36012e-06
MEDAG	mesenteric estrogen dependent adipogenesis	0.48149	0.345186	0.87006	0.539112		0.510969	0.30023	0.635938	0.0151679
UPP1	uridine phosphorylase 1	8.01289	7.08103	0.915967	0.627975		9.14035	5.92243	0.635793	2.89809e-07
CUTC	cutC copper transporter	9.14604	7.94801	0.906936	0.479185		10.0961	6.69009	0.635641	1.10504e-12
ICAM5	intercellular adhesion molecule 5	0.318739	0.192928	0.731744	0.0845223		0.342201	0.206496	0.635587	0.00890887
CYP3A7	cytochrome P450 family 3 subfamily A member 7	1.02815	0.939951	0.944053	0.808782		1.62775	1.05772	0.635579	0.00127032
CHST13	carbohydrate sulfotransferase 13	1.37153	0.772895	0.724635	0.0572667		2.3899	1.53707	0.635287	0.00104369
ACADM	acyl-CoA dehydrogenase, C-4 to C-12 straight chain	66.9246	47.7743	0.798913	0.162258		81.9654	55.6926	0.63513	3.5054e-06
GUCA2A	guanylate cyclase activator 2A	182.854	35.4027	0.705613	0.0524444		56.64	34.922	0.634652	0.00107206
WNT3	Wnt family member 3	1.82677	1.70449	0.994355	0.986718		3.47185	2.37606	0.634641	0.00024453
CMAS	cytidine monophosphate N-acetylneuraminic acid synthetase	38.5827	32.089	0.884096	0.408835		44.6313	29.804	0.634386	1.07939e-08
TEX35	testis expressed 35	0.756	0.958177	1.09213	0.718048		1.30827	0.791387	0.634356	0.0166622
BST1	bone marrow stromal cell antigen 1	27.1513	21.3543	0.928474	0.768294		36.0707	24.8166	0.634342	2.54741e-06
GREM2	gremlin 2, DAN family BMP antagonist	4.27891	3.18041	0.874929	0.538041		3.35603	2.11844	0.633839	0.0165065
ARL11	ADP ribosylation factor like GTPase 11	1.02443	0.864164	0.903311	0.590053		1.11631	0.74494	0.633803	0.00115026
SLC7A9	solute carrier family 7 member 9	68.6084	58.116	0.959815	0.87659		94.8125	59.642	0.633094	0.000502742
CA10	carbonic anhydrase 10	0.429626	0.398697	0.988583	0.971643		0.406903	0.265398	0.632938	0.0021377
NAALADL1	N-acetylated alpha-linked acidic dipeptidase-like 1	11.4831	8.23262	0.84354	0.42613		17.1147	10.0334	0.632788	0.0167037
ADAMTS18	ADAM metallopeptidase with thrombospondin type 1 motif 18	0.0949208	0.0916473	0.967723	0.910524		0.131855	0.0803014	0.632558	0.0251271
ING2	inhibitor of growth family member 2	17.4765	13.0333	0.787389	0.0591009		20.357	14.1415	0.632357	3.46301e-06
MRFAP1	Morf4 family associated protein 1	48.3795	43.8853	0.901022	0.373762		56.1676	36.9214	0.632242	3.89525e-08
WDR60	WD repeat domain 60	7.73852	5.54918	0.715513	0.000128666		7.58655	5.22791	0.63223	1.89512e-12
BTNL8	butyrophilin like 8	44.7759	41.3553	0.940638	0.753254		78.9566	50.8201	0.632201	6.75921e-07
MALL	mal, T-cell differentiation protein like	21.0624	15.8742	0.826672	0.295906		24.7887	16.3626	0.632116	0.000137386
SLC6A4	solute carrier family 6 member 4	7.32866	7.4448	1.0172	0.95504		11.3559	7.04833	0.631622	0.00484384
C2orf40	chromosome 2 open reading frame 40	0.89563	0.94343	1.03706	0.895262		1.0185	0.573662	0.631068	0.0181045
GIMAP1	GTPase, IMAP family member 1	3.01097	2.40513	0.899311	0.634194		3.42613	2.23761	0.631067	3.14772e-05
WNT10B	Wnt family member 10B	0.753792	0.624187	0.904517	0.680279		0.702417	0.42419	0.630581	0.00640403
APOBEC1	apolipoprotein B mRNA editing enzyme catalytic subunit 1	62.0944	55.5945	0.973422	0.92706		88.3022	57.7603	0.630373	0.000242981
PLA2G12B	phospholipase A2 group XIIB	32.2056	30.6181	1.01736	0.955893		48.9695	32.0092	0.630324	5.00294e-05
CDO1	cysteine dioxygenase type 1	0.32281	0.227047	0.873896	0.554395		0.326875	0.183835	0.630283	0.0297303
KLRC3	killer cell lectin like receptor C3	1.43215	1.25787	0.938609	0.807949		2.20262	1.34837	0.630209	0.00467078
RARRES3	retinoic acid receptor responder 3	108.163	80.353	0.863999	0.479428		140.672	91.023	0.630176	6.24405e-06
F11-AS1	F11 antisense RNA 1	4.78412	3.31645	0.866289	0.52515		5.90904	3.96485	0.629369	5.76483e-07
PLS1	plastin 1	183.578	157.857	0.921475	0.601274		246.314	163.747	0.62917	2.12946e-07
NR1I3	nuclear receptor subfamily 1 group I member 3	7.73366	5.85248	0.85012	0.368557		9.45072	6.17359	0.628601	7.15323e-06
CLEC14A	C-type lectin domain family 14 member A	7.85557	5.74392	0.853803	0.45944		8.75217	5.8003	0.62845	1.93227e-07
CYP2D6	cytochrome P450 family 2 subfamily D member 6	4.01567	2.66953	0.761207	0.0404271		6.2383	4.04177	0.628431	3.77619e-05
RGS2	regulator of G-protein signaling 2	204.577	162.112	0.925488	0.762005		270.88	172.005	0.628331	0.00305171
HSD17B2	hydroxysteroid 17-beta dehydrogenase 2	251.903	205.829	0.93498	0.781071		289.391	181.103	0.628004	2.46172e-05
RBKS	ribokinase	9.64331	7.49399	0.903271	0.618568		12.5393	8.15723	0.627972	1.75409e-06
GLRX	glutaredoxin	46.2125	38.5885	0.92541	0.746234		61.8344	40.0982	0.627791	1.19818e-05
ASAH2	N-acylsphingosine amidohydrolase (non-lysosomal ceramidase) 2	116.118	88.8976	0.935571	0.776924		159.651	103.735	0.627564	0.00330497
SOWAHA	sosondowah ankyrin repeat domain family member A	33.8297	27.5093	0.89762	0.567735		47.3795	31.0472	0.627307	1.40139e-07
TMEM169	transmembrane protein 169	0.472049	0.441573	0.963804	0.886004		0.688028	0.449556	0.62682	0.000202296
CD82	CD82 molecule	41.0474	35.6216	0.950383	0.805941		54.9877	35.2073	0.626655	2.26345e-17
KIFC3	kinesin family member C3	5.94973	4.37185	0.868968	0.490521		7.73639	5.05822	0.626525	4.16832e-06
UACA	uveal autoantigen with coiled-coil domains and ankyrin repeats	20.2662	14.4448	0.779728	0.0473876		22.0417	14.9909	0.62651	5.63533e-08
CBR1	carbonyl reductase 1	292.123	260.174	0.969442	0.915542		414.423	262.828	0.626412	5.00779e-05
ABCA8	ATP binding cassette subfamily A member 8	7.3957	4.65614	0.719253	0.0261093		5.99778	4.05145	0.626342	0.000117953
HLA-DMB	major histocompatibility complex, class II, DM beta	67.5637	57.2652	0.939747	0.804869		85.9587	58.2944	0.626268	5.50301e-07
ALDH1A3	aldehyde dehydrogenase 1 family member A3	23.3573	16.082	0.811026	0.269269		26.3536	17.922	0.626263	1.44651e-05
ENKUR	enkurin, TRPC channel interacting protein	0.806592	0.568111	0.80013	0.218662		1.10028	0.705321	0.625957	0.000149346
FAM25C	family with sequence similarity 25 member C	0.170076	0.142652	0.975698	0.999875		0.295462	0.0862165	0.625729	0.0390324
FAM25G	family with sequence similarity 25 member G	0.170076	0.142652	0.975698	0.999875		0.295462	0.0862165	0.625729	0.0390324
TUBAL3	tubulin alpha like 3	27.1993	23.3229	0.936699	0.764006		35.4486	23.2612	0.625383	5.94319e-05
BRINP2	BMP/retinoic acid inducible neural specific 2	0.0908891	0.053826	0.809546	0.287516		0.13341	0.0701884	0.625335	0.0319198
MYOM3	myomesin 3	1.63059	1.3808	0.83946	0.295926		1.91276	1.27095	0.624946	0.000103221
CD8A	CD8a molecule	6.83108	6.23727	0.990072	0.97483		9.11635	5.91336	0.624699	5.39908e-05
SCIN	scinderin	31.5202	20.1451	0.755871	0.088608		36.5592	23.9799	0.62452	3.3311e-05
OTOP2	otopetrin 2	4.31412	0.332275	0.603285	0.000904304		0.824917	0.531981	0.624437	0.00834416
BST2	bone marrow stromal cell antigen 2	17.6823	12.4945	0.807653	0.189625		18.5856	12.5189	0.624148	8.13104e-06
SLCO4C1	solute carrier organic anion transporter family member 4C1	0.504167	0.380474	0.78029	0.0748637		1.61817	0.825097	0.62396	0.000348458
ACAT1	acetyl-CoA acetyltransferase 1	70.1269	53.132	0.862961	0.387385		90.6837	58.7969	0.623941	8.44794e-05
CYP2B7P	cytochrome P450 family 2 subfamily B member 7, pseudogene	9.08179	7.72895	0.923474	0.752581		9.61523	6.33509	0.62391	5.15623e-05
AGTR1	angiotensin II receptor type 1	0.530786	0.470822	0.963426	0.893598		0.449068	0.275641	0.623403	0.00388404
ABTB1	ankyrin repeat and BTB domain containing 1	5.22051	4.11778	0.748118	0.0416537		5.36528	3.60065	0.623063	3.51341e-05
PEPD	peptidase D	103.834	94.9282	1.0007	0.998554		161.431	101.721	0.622983	5.81251e-06
GZMH	granzyme H	1.06242	0.815083	0.851388	0.430986		1.23619	0.714877	0.622335	0.0071949
THRB-AS1	THRB antisense RNA 1	0.506959	0.231585	0.77772	0.178659		0.499061	0.232861	0.622321	0.0374065
GZMA	granzyme A	20.4423	17.5316	0.954468	0.865294		32.793	21.2462	0.622179	0.000210475
SMC3	structural maintenance of chromosomes 3	22.7673	17.8451	0.812965	0.0493186		24.5392	16.4167	0.622088	2.2555e-17
FIGF	#N/A	0.676109	0.602965	0.928107	0.772143		0.736332	0.462464	0.62203	0.00228315
HPGD	hydroxyprostaglandin dehydrogenase 15-(NAD)	153.289	115.086	0.863277	0.490044		180.319	109.301	0.621959	0.00667191
GLTPD2	glycolipid transfer protein domain containing 2	10.9869	8.76479	0.929868	0.773582		16.0402	10.1357	0.621325	0.000226124
FGL2	fibrinogen like 2	52.916	40.3412	0.840747	0.315312		57.1035	37.416	0.621126	2.85797e-08
C6orf123	#N/A	0.83104	0.562159	0.776313	0.177598		0.726363	0.446178	0.620991	0.00390833
LOC284801	#N/A	0.234692	0.0890872	0.780039	0.135017		0.159374	0.0559242	0.620937	0.0404111
RIMKLB	ribosomal modification protein rimK-like family member B	2.84819	2.26186	0.890194	0.577783		3.27419	2.13511	0.620808	7.59524e-05
PMP22	peripheral myelin protein 22	29.4712	31.0136	1.01785	0.949781		59.829	32.996	0.62062	0.0238032
RHOV	ras homolog family member V	0.343805	0.183079	0.787941	0.224565		0.374944	0.213726	0.620427	0.0183577
SLC10A2	solute carrier family 10 member 2	22.7615	12.8058	0.850873	0.409842		29.5592	17.2703	0.620203	0.0103354
CYP3A7-CYP3AP1	#N/A	0.759178	0.637326	0.891339	0.596654		1.10987	0.708326	0.619844	0.00058116
SMIM2-AS1	SMIM2 antisense RNA 1	4.31382	2.54732	0.726112	0.0413444		3.73696	2.39335	0.619685	2.58458e-05
LINC00526	long intergenic non-protein coding RNA 526	5.49681	4.00446	0.79489	0.0938491		6.28661	4.07597	0.619675	3.89525e-08
LINC00955	long intergenic non-protein coding RNA 955	1.85999	1.1811	0.772088	0.150558		2.68465	1.67811	0.619569	0.000288027
ADRB1	adrenoceptor beta 1	1.13723	1.00046	0.945933	0.802688		1.50912	0.922123	0.619234	0.000212902
TLCD2	TLC domain containing 2	11.0203	7.14457	0.725461	0.00648652		11.4904	7.41257	0.619005	6.03998e-10
PTH1R	parathyroid hormone 1 receptor	0.865412	0.659819	0.877074	0.553692		0.906706	0.533709	0.618719	0.00607262
NSRP1	nuclear speckle splicing regulatory protein 1	5.4705	3.72821	0.648487	1.41601e-06		5.01763	3.38085	0.618256	5.46441e-10
TMIGD2	transmembrane and immunoglobulin domain containing 2	2.48413	2.17712	0.943507	0.823805		3.60438	2.26865	0.617978	0.000611474
CGN	cingulin	43.544	27.2704	0.690248	0.000126776		44.7209	28.8899	0.617752	8.94012e-09
UNC13C	unc-13 homolog C (C. elegans)	0.218431	0.153916	0.866395	0.525163		0.282815	0.176004	0.617511	0.00110983
OPTN	optineurin	36.9523	28.8505	0.841124	0.0739192		45.2278	29.5072	0.617025	6.10814e-12
CATSPERG	cation channel sperm associated auxiliary subunit gamma	0.693327	0.490845	0.797525	0.17886		0.826141	0.524699	0.616895	9.42709e-06
IGSF9	immunoglobulin superfamily member 9	6.29911	3.52246	0.68894	0.00991977		8.25304	5.383	0.616879	9.57815e-05
HKDC1	hexokinase domain containing 1	43.9875	39.475	0.980453	0.945255		60.3692	38.8953	0.61664	2.57322e-06
SGMS2	sphingomyelin synthase 2	19.2506	17.2415	0.924439	0.640372		27.4689	17.7979	0.615613	5.72045e-08
PTPRD	protein tyrosine phosphatase, receptor type D	7.35679	5.39252	0.809439	0.245719		6.34917	4.64465	0.614995	1.41511e-05
KLRC2	killer cell lectin like receptor C2	1.28129	1.10432	0.972045	0.911627		1.81743	1.06694	0.614622	0.00285811
GPR55	G protein-coupled receptor 55	1.63051	1.14947	0.823637	0.331787		1.71575	1.04359	0.613831	0.000336325
CD8B	CD8b molecule	3.33239	3.18964	1.01532	0.958869		4.59353	2.90822	0.613374	0.00117938
TRIM15	tripartite motif containing 15	18.2959	15.6259	0.93414	0.593254		27.8071	17.5547	0.613202	5.9592e-09
ACE	angiotensin I converting enzyme	55.8017	48.3399	0.941136	0.802688		90.39	56.5392	0.613194	3.42455e-05
SLC7A7	solute carrier family 7 member 7	42.8422	43.4484	1.05101	0.854106		70.6735	45.5417	0.612409	2.8288e-05
GIMAP4	GTPase, IMAP family member 4	20.4515	14.2687	0.824796	0.341867		22.4284	14.5694	0.612014	1.47721e-06
PTGR1	prostaglandin reductase 1	184.834	181.789	0.998139	0.996013		204.617	127.541	0.611898	3.47819e-06
CCR5	C-C motif chemokine receptor 5 (gene/pseudogene)	3.40579	2.48428	0.833782	0.330291		3.46918	2.19271	0.611439	2.34398e-07
MGAM	maltase-glucoamylase	96.3043	80.248	0.952865	0.854231		145.527	92.6697	0.611278	0.000258547
EZR	ezrin	154.055	134.484	0.864023	0.226347		202.604	129.053	0.611134	8.0001e-09
TYRP1	tyrosinase related protein 1	3.25861	3.59355	1.03744	0.897561		3.31431	2.04112	0.610988	0.000425774
PAQR7	progestin and adipoQ receptor family member 7	19.1166	14.924	0.902721	0.669272		24.6064	16.0433	0.610911	4.87703e-05
ISG15	ISG15 ubiquitin-like modifier	26.3982	21.5097	0.905779	0.626366		30.6457	19.2395	0.610704	0.000242952
TDP2	tyrosyl-DNA phosphodiesterase 2	151.812	108.693	0.831431	0.281387		158.991	98.0358	0.610536	1.46629e-06
FABP2	fatty acid binding protein 2	298.644	253.163	0.950776	0.854231		431.098	276.426	0.610426	0.0002777
GAL3ST1	galactose-3-O-sulfotransferase 1	9.64833	6.8634	0.824554	0.258526		12.8083	8.11701	0.609892	7.72869e-06
FMO1	flavin containing monooxygenase 1	0.270057	0.330621	1.13836	0.572286		0.432442	0.184935	0.608869	0.0324702
ALDOB	aldolase, fructose-bisphosphate B	2479.92	2388.02	1.0235	0.937966		3704.12	2392.25	0.608744	0.000152176
PDZD7	PDZ domain containing 7	2.10257	1.85638	1.00914	0.97565		3.14041	1.94127	0.608656	1.97686e-05
GGT3P	gamma-glutamyltransferase 3 pseudogene	0.0838022	0.047639	0.918573	0.999875		0.141532	0.0619065	0.608484	0.0331298
CHP2	calcineurin like EF-hand protein 2	152.542	113.796	0.808524	0.228126		167.981	105.205	0.607951	7.30711e-08
GJA1	gap junction protein alpha 1	9.04341	7.33355	0.864437	0.24711		10.7374	6.904	0.607471	2.28117e-06
ADM	adrenomedullin	6.40462	4.52354	0.791282	0.126984		7.67502	4.67068	0.607288	0.000266029
RP11-1223D19.1	0	0.326139	0.290065	0.993856	0.985329		0.558704	0.278715	0.606997	0.0238747
HLA-DRA	major histocompatibility complex, class II, DR alpha	904.886	778.67	0.958438	0.87677		1162.33	752.792	0.606269	2.27489e-07
DNASE1	deoxyribonuclease I	63.3049	50.7036	0.92876	0.773892		89.1765	57.6822	0.606266	1.33068e-07
CEACAM18	carcinoembryonic antigen related cell adhesion molecule 18	11.1759	8.61191	0.90501	0.682336		19.2282	12.3699	0.605932	3.86307e-07
PLLP	plasmolipin	25.9818	25.5975	1.05161	0.814903		33.5548	21.5118	0.605778	6.09336e-09
CD163L1	CD163 molecule like 1	11.1033	8.44775	0.806916	0.155883		12.6866	7.98263	0.605011	0.00013582
PMVK	phosphomevalonate kinase	11.5602	11.5883	0.994411	0.985329		15.0555	9.18346	0.604412	8.0079e-08
MME	membrane metallo-endopeptidase	287.369	244.599	0.963601	0.890739		406.992	257.93	0.604272	1.847e-05
SLC28A2	solute carrier family 28 member 2	112.68	80.0397	0.814635	0.317145		145.598	76.7147	0.604159	2.2139e-05
ADAMDEC1	ADAM like decysin 1	317.203	231.55	0.842109	0.400195		373.016	223.725	0.603933	0.00208631
LMO7	LIM domain 7	44.7978	33.9938	0.82526	0.169407		55.2429	34.9842	0.603523	1.36741e-08
IGSF23	immunoglobulin superfamily member 23	6.84767	4.99868	0.891789	0.626652		10.6455	6.17322	0.602952	0.000340892
MSRA	methionine sulfoxide reductase A	13.0925	10.4705	0.887464	0.409842		16.609	10.4921	0.602831	7.20358e-11
RAB17	RAB17, member RAS oncogene family	29.8152	21.1881	0.803202	0.162011		38.3608	24.2213	0.602259	2.67947e-08
MEP1B	meprin A subunit beta	345.396	265.173	0.919859	0.731896		485.349	296.91	0.602237	0.000899604
VAMP8	vesicle associated membrane protein 8	113.838	75.3197	0.753037	0.0187955		135.166	84.1407	0.602014	6.3754e-06
GZMM	granzyme M	1.76613	1.66221	0.962507	0.890739		2.43582	1.39083	0.601645	0.00276978
PTPRR	protein tyrosine phosphatase, receptor type R	6.07686	3.29347	0.755943	0.0739714		6.49453	4.15668	0.601009	4.03289e-07
CYP2J2	cytochrome P450 family 2 subfamily J member 2	44.464	34.5744	0.897697	0.566627		61.0704	40.333	0.600717	4.54241e-05
EGF	epidermal growth factor	0.171468	0.121066	0.938447	0.806853		0.152598	0.0728181	0.600629	0.0196834
TINAG	tubulointerstitial nephritis antigen	6.1773	4.46216	0.831255	0.336237		8.29969	5.33786	0.600583	1.84089e-08
BMP8B	bone morphogenetic protein 8b	5.51687	3.48089	0.759058	0.0921931		7.12678	4.28477	0.599919	0.000154646
LINC00337	long intergenic non-protein coding RNA 337	0.268241	0.245655	0.973114	0.926977		0.381294	0.208021	0.599364	0.00942698
SLC30A4	solute carrier family 30 member 4	11.8133	9.58372	0.870988	0.323019		14.6971	9.32653	0.599068	2.54957e-08
RUNDC3B	RUN domain containing 3B	3.53194	2.10635	0.704234	0.00615395		3.36701	2.02582	0.598824	7.66432e-06
SLC2A2	solute carrier family 2 member 2	72.8623	63.9105	0.978961	0.939633		128.587	82.5731	0.598496	0.000927547
GPX4	glutathione peroxidase 4	163.189	125.178	0.850641	0.35617		214.708	133.994	0.59818	1.2715e-08
KCNK13	potassium two pore domain channel subfamily K member 13	0.354541	0.245879	0.774567	0.175291		0.356756	0.193305	0.59813	0.0125572
CTD-3080P12.3	uncharacterized LOC101928857	5.60885	3.90062	0.892203	0.605379		7.4562	4.62292	0.597998	0.000116769
SLC15A1	solute carrier family 15 member 1	142.863	105.669	0.89827	0.652823		188.611	116.794	0.59792	2.88357e-05
STOM	stomatin	40.9773	31.17	0.8471	0.349171		53.0342	32.5813	0.597443	2.21662e-05
C1orf220	chromosome 1 open reading frame 220	2.35351	1.63453	0.704803	0.00503543		2.53209	1.62674	0.596594	1.30986e-07
LAMB3	laminin subunit beta 3	34.3682	29.1603	0.914681	0.575717		55.5773	35.1779	0.596362	2.12719e-08
HYI	hydroxypyruvate isomerase (putative)	39.2034	30.7784	0.871203	0.414454		49.5876	30.7737	0.595115	3.85489e-08
TARP	#N/A	2.83766	2.31956	0.905925	0.680266		4.37084	2.50604	0.594722	0.00234539
BTNL2	butyrophilin like 2	1.30332	0.917129	0.887223	0.591501		2.47072	1.42178	0.59449	0.00223734
SLC51B	solute carrier family 51 beta subunit	42.2903	31.226	0.879278	0.563592		54.319	33.1227	0.594488	0.000183569
IL18	interleukin 18	30.407	27.7739	0.972315	0.884629		40.4924	25.9645	0.593826	1.5581e-10
CD247	CD247 molecule	8.26839	5.98929	0.841802	0.389441		11.2392	6.88993	0.593723	2.69758e-05
AP000688.14	0	122.074	95.3592	0.900124	0.655634		164.826	98.855	0.59363	1.11617e-05
TTC36	tetratricopeptide repeat domain 36	14.8075	11.3268	0.896706	0.647583		22.7843	13.868	0.593387	1.50785e-06
LGALS2	galectin 2	37.2059	26.7447	0.810021	0.201091		32.2798	19.871	0.593352	1.95191e-05
ABCG2	ATP binding cassette subfamily G member 2 (Junior blood group)	61.9383	51.8811	0.916892	0.709625		83.4691	47.7062	0.593336	0.00164512
C1orf177	#N/A	1.69407	0.917848	0.664896	0.00536418		1.46577	0.901962	0.593307	7.51569e-05
LINC00570	long intergenic non-protein coding RNA 570	0.545052	0.423847	0.917186	0.730516		1.02746	0.564474	0.592674	0.0055405
AKR1B10	aldo-keto reductase family 1 member B10	525.412	497.243	1.0071	0.984337		787.35	446.069	0.592435	0.00116778
APOC3	apolipoprotein C3	678.42	588.541	0.979349	0.939421		1237.39	780.101	0.592416	0.00575485
KLRC1	killer cell lectin like receptor C1	0.928186	0.875604	0.998396	0.996403		1.08765	0.549911	0.592413	0.00202567
ASPDH	aspartate dehydrogenase domain containing	4.97162	3.64893	0.910904	0.70545		7.26962	3.97812	0.591976	0.00857858
SERPINI2	serpin family I member 2	0.6523	0.430018	0.867748	0.518176		1.26891	0.722143	0.59124	0.00630416
LINC00330	long intergenic non-protein coding RNA 330	1.00695	0.534435	0.829685	0.34118		1.27955	0.787485	0.590888	0.0031149
NTNG2	netrin G2	1.26132	0.583233	0.712757	0.0627258		1.37593	0.797334	0.590768	0.00154982
BHLHE22	basic helix-loop-helix family member e22	0.269187	0.146998	0.782302	0.203834		0.239013	0.125944	0.589314	0.0101513
TMEM120A	transmembrane protein 120A	36.4943	29.3716	0.887791	0.485314		47.7179	28.0427	0.589103	7.54959e-08
SPHK1	sphingosine kinase 1	2.45529	1.5934	0.788509	0.188367		3.3147	2.05671	0.588609	6.37252e-06
ABHD6	abhydrolase domain containing 6	32.5897	27.3252	0.951223	0.837006		49.5746	29.0512	0.58855	5.11201e-07
KRT73	keratin 73	0.777487	0.664082	0.895431	0.638562		0.994096	0.578184	0.587882	0.00103099
DEFB131	defensin beta 131	3.64289	3.8135	1.06527	0.803156		6.39544	3.52575	0.58783	0.00383389
PNLIPRP2	pancreatic lipase related protein 2 (gene/pseudogene)	41.1371	29.2183	0.860286	0.493826		62.447	36.8807	0.587706	3.49687e-06
PHEX	phosphate regulating endopeptidase homolog, X-linked	0.891685	0.545432	0.803506	0.279181		1.5077	0.870684	0.587375	0.00172548
SMIM2	small integral membrane protein 2	2.48508	1.2781	0.64901	0.00366991		1.93507	1.15917	0.586628	0.000143063
GABRG1	gamma-aminobutyric acid type A receptor gamma1 subunit	0.097379	0.0510505	0.805179	0.260625		0.11698	0.0523878	0.586623	0.0149924
HIST1H4E	histone cluster 1, H4e	366.483	249.012	0.712181	2.34546e-08		367.205	225.956	0.586451	1.48531e-15
TMEM82	transmembrane protein 82	10.9327	9.15493	0.965227	0.894653		16.4076	9.71603	0.586359	4.4775e-06
DCLK3	doublecortin like kinase 3	0.265293	0.193327	0.856939	0.487343		0.297322	0.166302	0.585793	0.000783978
FAM184A	family with sequence similarity 184 member A	3.15849	1.89998	0.783851	0.214126		3.48352	2.09005	0.585725	2.01734e-05
HNF4G	hepatocyte nuclear factor 4 gamma	119.769	95.1172	0.896763	0.605798		163.612	97.7241	0.585637	2.90434e-08
GK	glycerol kinase	12.1845	8.9879	0.864854	0.488946		18.4058	11.0994	0.585602	1.51416e-05
MATK	megakaryocyte-associated tyrosine kinase	2.71895	2.24151	0.913143	0.696435		3.93	2.3767	0.584873	4.48792e-07
HLA-DQB1	major histocompatibility complex, class II, DQ beta 1	90.7781	79.6984	0.871925	0.497289		56.8319	33.4938	0.584551	2.96644e-09
GRK5	G protein-coupled receptor kinase 5	27.5328	22.2151	0.907965	0.647375		35.1174	21.6632	0.584419	2.28288e-07
FABP1	fatty acid binding protein 1	2828.53	1641.01	0.742432	0.0839626		2741.25	1614.66	0.583812	0.000643122
CD7	CD7 molecule	7.14399	4.96404	0.807885	0.281974		9.28924	5.62344	0.583506	8.54998e-05
RBM46	RNA binding motif protein 46	0.23126	0.173949	0.944906	0.999875		0.113058	0.0415126	0.582978	0.0207502
SHBG	sex hormone binding globulin	2.5198	2.29155	0.991986	0.981887		5.06286	2.66487	0.582712	0.00738242
HCG4B	HLA complex group 4B (non-protein coding)	11.989	5.61098	0.569273	4.65464e-05		8.18908	4.63051	0.582604	9.62273e-06
LCT	lactase	322.136	277.887	0.97279	0.921596		426.804	254.965	0.582503	0.000755526
HLA-DPB1	major histocompatibility complex, class II, DP beta 1	47.6776	32.9294	0.793828	0.143649		50.0169	32.4395	0.582097	1.10037e-09
BMPER	BMP binding endothelial regulator	1.1768	0.88158	0.863001	0.491061		1.17767	0.666427	0.580964	0.000183778
CRIP1	cysteine rich protein 1	104.751	86.9813	0.895763	0.60308		227.254	117.991	0.580828	0.00241665
TMEM220-AS1	TMEM220 antisense RNA 1	5.47691	3.85483	0.78917	0.100825		6.95744	4.13604	0.580555	7.98108e-08
ME1	malic enzyme 1	15.0272	14.5989	1.00031	0.999033		19.3759	12.3297	0.579996	8.39044e-06
FBXO2	F-box protein 2	11.0005	7.70953	0.894193	0.636967		15.0984	8.65553	0.579812	2.31235e-05
AQP7	aquaporin 7	8.04413	4.42589	0.68126	0.0123306		10.4539	5.97901	0.579783	0.000388728
UGT2A3	UDP glucuronosyltransferase family 2 member A3	175.346	141.953	0.923003	0.739682		263.837	159.452	0.579617	1.79384e-06
KIF6	kinesin family member 6	0.167095	0.0959105	0.806174	0.284267		0.205328	0.108637	0.579218	0.00518353
VNN1	vanin 1	141.161	131.951	0.989222	0.972298		214.627	135.241	0.578943	6.22786e-06
THRB	thyroid hormone receptor beta	3.87171	1.75666	0.711372	0.0390889		3.58491	1.78608	0.578728	0.00172535
KRT81	keratin 81	0.124113	0.0683519	0.847127	0.411131		0.207783	0.0934731	0.578617	0.015494
REEP6	receptor accessory protein 6	118.255	83.8255	0.875067	0.556448		152.186	90.4387	0.578106	3.50165e-06
CD163	CD163 molecule	7.41465	4.98131	0.68902	0.00607374		6.5444	3.96151	0.577687	1.51926e-05
RBP2	retinol binding protein 2	2346.13	1903.07	0.955217	0.859236		3642.58	2143.01	0.577532	0.000361028
SLC28A1	solute carrier family 28 member 1	10.9021	8.74667	0.9513	0.843124		17.1863	10.2096	0.577029	2.84226e-05
SERPINA12	serpin family A member 12	0.0308564	0.0223422	0.97444	0.999875		0.107269	0.027376	0.576238	0.015208
MYOM2	myomesin 2	0.573941	0.351027	0.79414	0.228167		0.886949	0.533182	0.575828	1.98786e-06
SLC13A1	solute carrier family 13 member 1	0.170488	0.148964	0.914501	0.718048		0.172757	0.0773051	0.575267	0.0151051
SMLR1	small leucine rich protein 1	13.2739	10.1862	0.923503	0.74937		18.1715	10.4253	0.574772	1.79793e-06
CA11	carbonic anhydrase 11	2.13212	1.6276	0.886465	0.594741		2.73628	1.54166	0.57433	0.000149711
ENPP3	ectonucleotide pyrophosphatase/phosphodiesterase 3	37.8127	27.0884	0.857863	0.477936		54.4	32.3603	0.57364	3.17449e-05
ADSSL1	adenylosuccinate synthase like 1	2.17948	1.62753	0.794136	0.0778544		2.52057	1.45978	0.573634	1.23212e-06
ADORA2A	adenosine A2a receptor	3.21317	2.5949	0.908978	0.647751		4.46061	2.76065	0.573271	8.67902e-08
HLA-F	major histocompatibility complex, class I, F	94.0281	76.5969	0.85308	0.375689		128.441	76.4112	0.572721	1.59268e-11
MTTP	microsomal triglyceride transfer protein	261.83	241.696	0.993221	0.984018		475.494	283.466	0.572512	3.20074e-06
SOX11	SRY-box 11	0.0187099	0.0176081	0.988652	0.999875		0.0258217	0.00640441	0.571591	0.0141101
F10	coagulation factor X	8.5348	5.86956	0.850075	0.452174		10.5252	6.28893	0.571041	9.73449e-07
CYP3A4	cytochrome P450 family 3 subfamily A member 4	407.463	409.793	1.02771	0.925605		589.261	352.565	0.570703	1.8605e-05
TPSG1	tryptase gamma 1	11.6864	10.2835	0.919283	0.734319		20.9423	12.0511	0.570694	6.22353e-06
C5	complement component 5	4.00947	2.99422	0.909088	0.691876		7.20417	4.01517	0.570687	0.000668707
RNF186	ring finger protein 186	74.8842	48.0262	0.765606	0.162401		96.5093	57.1306	0.570151	3.36121e-07
SEC14L2	SEC14 like lipid binding 2	12.5445	10.9126	0.962086	0.881763		18.7006	10.8842	0.569616	1.33783e-08
C1orf115	chromosome 1 open reading frame 115	117.274	84.293	0.81912	0.266038		147.88	86.9817	0.568918	6.91668e-08
UGT1A10	UDP glucuronosyltransferase family 1 member A10	125.789	128.525	0.975936	0.925119		170.83	100.879	0.568092	7.50896e-08
KHK	ketohexokinase	55.7285	44.3411	0.932189	0.787032		84.0528	48.6572	0.567954	1.03495e-07
AKR7L	aldo-keto reductase family 7 like (gene/pseudogene)	21.8008	16.1031	0.85045	0.406679		30.6081	18.1772	0.56783	7.80739e-10
PLOD2	procollagen-lysine,2-oxoglutarate 5-dioxygenase 2	54.0235	34.0675	0.73944	0.0630841		60.1606	35.184	0.567447	7.99955e-08
WNT11	Wnt family member 11	1.60804	0.979575	0.824661	0.357486		3.07427	1.69522	0.567143	0.000100576
HACL1	2-hydroxyacyl-CoA lyase 1	52.3764	43.5308	0.93996	0.810338		73.6929	40.2681	0.566182	7.17878e-08
NEXN	nexilin F-actin binding protein	3.90655	2.62346	0.74558	0.0522769		4.06861	2.46138	0.566136	9.58258e-09
HLA-DRB1	major histocompatibility complex, class II, DR beta 1	355.133	286.62	0.933276	0.787285		416.112	250.671	0.566096	3.37046e-09
MEP1A	meprin A subunit alpha	254.253	183.992	0.846801	0.418151		367.161	214.205	0.565946	5.50823e-08
NELL2	neural EGFL like 2	17.4049	11.4283	0.857034	0.486274		25.2534	14.56	0.565774	2.7162e-06
IFIT3	interferon induced protein with tetratricopeptide repeats 3	19.2965	14.676	0.876716	0.549778		27.3193	15.8983	0.565261	7.36519e-10
TMEM220	transmembrane protein 220	13.5909	8.63514	0.716168	0.00763541		15.2901	8.88177	0.565089	3.73503e-08
MYH2	myosin, heavy chain 2, skeletal muscle, adult	0.105949	0.0444917	0.694761	0.0402043		0.0953334	0.0411151	0.564608	0.0110256
CCDC152	coiled-coil domain containing 152	276.42	200.273	0.814673	0.241543		361.496	213.433	0.563829	3.09729e-07
RMDN3	regulator of microtubule dynamics 3	27.9334	21.3047	0.871015	0.4262		35.3277	20.4338	0.563789	4.06903e-09
VWCE	von Willebrand factor C and EGF domains	0.298183	0.288529	1.06999	0.792109		0.50464	0.278779	0.563071	0.000156182
LRAT	lecithin retinol acyltransferase (phosphatidylcholine--retinol O-acyltransferase)	7.80896	4.5357	0.848312	0.40401		9.41262	5.37811	0.562682	2.65049e-06
NUDT9	nudix hydrolase 9	17.0429	12.9239	0.772557	0.0164342		18.6639	11.1504	0.562605	9.92194e-14
SEPHS2	selenophosphate synthetase 2	45.3024	35.8529	0.767839	0.0484		56.3366	32.0759	0.559955	1.48787e-06
DPEP1	dipeptidase 1 (renal)	50.517	47.1515	0.993627	0.985578		86.004	50.2189	0.559131	0.000588635
ACAD11	acyl-CoA dehydrogenase family member 11	22.9859	17.6823	0.903812	0.652335		31.0308	18.8778	0.55794	1.65679e-08
FADS6	fatty acid desaturase 6	6.32591	4.35038	0.879947	0.567735		9.6121	4.84683	0.557672	0.000894329
HLA-DRB5	major histocompatibility complex, class II, DR beta 5	180.659	149.087	0.94491	0.830524		215.522	114.599	0.556181	3.31094e-10
CYP4F2	cytochrome P450 family 4 subfamily F member 2	38.1551	28.6525	0.891018	0.622477		61.9992	35.3251	0.555596	3.52843e-07
CTSZ	cathepsin Z	197.829	132.414	0.726684	0.00128113		218.115	127.214	0.55493	1.35586e-12
NEU4	neuraminidase 4 (sialidase)	9.68697	6.30531	0.853056	0.465142		12.7627	7.41276	0.554698	1.47359e-06
SEPP1	selenoprotein P, plasma, 1	564.26	410.054	0.820791	0.268629		752.014	435.739	0.554019	1.08455e-07
UNC93A	unc-93 homolog A (C. elegans)	4.08982	3.67439	1.0078	0.982411		6.09302	3.0747	0.553687	6.73201e-05
PRKG2	protein kinase, cGMP-dependent, type II	10.9864	7.76789	0.849877	0.435867		16.8	10.2401	0.553677	1.00317e-05
SPIB	Spi-B transcription factor	6.40468	3.70129	0.734001	0.048187		8.1133	4.37278	0.553512	0.000665176
GBA3	glucosylceramidase beta 3 (gene/pseudogene)	125.217	110.36	0.97177	0.921862		188.667	107.212	0.553061	3.51246e-06
SFRP5	secreted frizzled related protein 5	28.2125	17.5857	0.85152	0.448698		38.8366	22.014	0.552829	3.67741e-07
ESM1	endothelial cell specific molecule 1	0.519845	0.287349	0.768224	0.171339		0.681407	0.334761	0.552678	0.00222257
AGPAT9	#N/A	44.5105	43.2964	1.02595	0.92706		65.0593	35.2792	0.552198	0.000281158
CLIC5	chloride intracellular channel 5	20.9406	10.2422	0.681747	0.0182942		21.4106	12.076	0.552092	0.000124989
ACSL6	acyl-CoA synthetase long-chain family member 6	4.40105	2.84004	0.836413	0.402357		5.02952	2.93936	0.549372	2.43721e-10
PHLPP2	PH domain and leucine rich repeat protein phosphatase 2	19.6327	11.1231	0.713192	0.0136402		21.4445	12.6306	0.548603	6.32274e-09
RGN	regucalcin	8.15237	6.96027	0.972716	0.925037		13.2335	7.3682	0.548276	5.09695e-08
C17orf67	chromosome 17 open reading frame 67	1.39993	1.26299	0.952101	0.827255		2.0329	1.12168	0.547249	7.87886e-05
AQP11	aquaporin 11	20.9534	17.3799	0.939904	0.805935		31.1904	17.6201	0.546639	5.49341e-08
DPP4	dipeptidyl peptidase 4	137.544	106.309	0.879287	0.562805		193.14	108.192	0.546538	4.7019e-09
IFIT2	interferon induced protein with tetratricopeptide repeats 2	9.91786	5.97166	0.721744	0.0470698		11.2903	6.36469	0.546451	1.09004e-07
CPA2	carboxypeptidase A2	6.85822	4.87419	0.879213	0.575717		14.3006	6.87569	0.545955	0.0029611
UGT1A6	UDP glucuronosyltransferase family 1 member A6	98.4356	100.027	0.98015	0.941385		134.948	76.1418	0.545614	3.97942e-08
KLRC4-KLRK1	KLRC4-KLRK1 readthrough	10.2818	8.3742	0.908914	0.666084		13.5179	7.81058	0.544897	8.2459e-07
UGT1A8	UDP glucuronosyltransferase family 1 member A8	106.544	107.833	0.978962	0.937877		146.592	82.3981	0.54432	4.49436e-08
UGT1A9	UDP glucuronosyltransferase family 1 member A9	107.268	108.649	0.98022	0.941856		147.741	83.0204	0.544181	4.99543e-08
CD160	CD160 molecule	7.79855	6.53944	0.925441	0.760675		11.3148	6.25299	0.544079	1.09511e-05
TM4SF5	transmembrane 4 L six family member 5	70.6796	53.6817	0.91178	0.691876		93.6034	50.8168	0.543919	1.80066e-07
SLC5A4	solute carrier family 5 member 4	19.4352	17.4833	0.985008	0.960992		41.809	20.7485	0.543841	0.000506044
UGT1A7	UDP glucuronosyltransferase family 1 member A7	109.187	110.655	0.980697	0.943803		150.431	84.5421	0.54351	3.19532e-08
HTATIP2	HIV-1 Tat interactive protein 2	73.1378	58.5992	0.87038	0.428275		96.1885	53.9382	0.54256	6.32304e-10
CD36	CD36 molecule	69.8163	51.4498	0.904609	0.677261		90.6885	46.6821	0.541554	0.000546451
SDR16C5	short chain dehydrogenase/reductase family 16C, member 5	4.97956	5.89686	1.03953	0.890599		10.8102	5.50176	0.541304	2.47771e-05
UGT1A3	UDP glucuronosyltransferase family 1 member A3	109.594	110.864	0.981563	0.947077		151.463	84.5659	0.541004	3.8975e-08
SLC35G1	solute carrier family 35 member G1	63.8336	43.8219	0.851256	0.459949		92.2258	49.6171	0.540837	2.57322e-06
UGT1A5	UDP glucuronosyltransferase family 1 member A5	109.539	110.765	0.98092	0.944442		151.341	84.483	0.540699	3.26091e-08
UGT1A4	UDP glucuronosyltransferase family 1 member A4	108.267	109.504	0.981318	0.946174		149.332	83.2735	0.540693	3.47351e-08
CA7	carbonic anhydrase 7	9.16746	3.28052	0.723546	0.0765133		6.89535	3.86658	0.540219	1.50598e-05
RENBP	renin binding protein	3.27089	1.995	0.727801	0.0576994		4.4445	2.45447	0.538681	6.84985e-06
KLRK1	killer cell lectin like receptor K1	11.8252	9.48702	0.899024	0.623957		15.5209	8.836	0.536712	7.01302e-07
SIGLEC15	sialic acid binding Ig like lectin 15	2.2097	1.92175	0.966622	0.906569		3.39943	1.74246	0.536523	1.02434e-05
ACE2	angiotensin I converting enzyme 2	238.317	181.545	0.910267	0.697812		361.231	181.27	0.535815	0.000255311
LINC00479	long intergenic non-protein coding RNA 479	1.16774	0.715193	0.778012	0.186032		1.7663	0.90086	0.53542	0.000231438
CBS	cystathionine-beta-synthase	0.309265	0.214007	0.79225	0.217025		0.437514	0.224014	0.53492	0.000188518
CIB2	calcium and integrin binding family member 2	20.264	17.6204	1.00918	0.974241		28.1732	15.5724	0.534692	6.19439e-08
GCHFR	GTP cyclohydrolase I feedback regulator	34.2176	24.6158	0.848513	0.395773		51.5756	28.2826	0.532466	1.31591e-08
NAT8B	N-acetyltransferase 8B (putative, gene/pseudogene)	34.3261	21.6689	0.78514	0.218116		57.0043	28.2093	0.531919	2.12282e-06
KCNJ16	potassium voltage-gated channel subfamily J member 16	1.41962	0.72849	0.744853	0.119301		1.11464	0.549251	0.531748	7.28202e-05
CDKN2B	cyclin dependent kinase inhibitor 2B	26.1394	13.553	0.682364	0.0116385		26.111	14.4204	0.531712	8.85008e-09
SLC25A5	solute carrier family 25 member 5	377.587	287.306	0.805445	0.0523591		509.438	270.679	0.531184	8.25195e-13
PON3	paraoxonase 3	7.16377	5.66352	0.923559	0.713737		9.48015	5.11659	0.528284	2.47715e-08
DHDH	dihydrodiol dehydrogenase	18.5021	14.9625	0.953192	0.856232		29.6557	15.2808	0.528037	9.06192e-06
C19orf69	#N/A	23.6294	15.5464	0.893438	0.594935		36.7033	18.2107	0.528003	0.000293921
UGT1A1	UDP glucuronosyltransferase family 1 member A1	154.044	153.766	0.980136	0.9444		217.364	117.093	0.525118	1.89744e-08
ALDOC	aldolase, fructose-bisphosphate C	15.5266	12.4207	0.855934	0.41607		19.7728	10.4087	0.524645	1.07183e-06
C8G	complement component 8, gamma polypeptide	36.7468	27.3337	0.922727	0.748518		53.544	26.2387	0.52434	0.000130973
TLL1	tolloid like 1	1.26224	1.04224	0.907309	0.652823		2.33152	1.24957	0.524061	1.09592e-07
SSUH2	ssu-2 homolog (C. elegans)	6.42283	5.68596	0.948104	0.843409		11.517	6.10745	0.523704	1.07957e-05
COL25A1	collagen type XXV alpha 1	3.46837	2.11797	0.8808	0.548881		5.92982	2.69745	0.522793	0.00157646
CRIP3	cysteine rich protein 3	2.2272	1.71112	0.902721	0.666059		5.66017	3.03404	0.522273	7.61377e-06
MYH7	myosin, heavy chain 7, cardiac muscle, beta	0.309985	0.225747	0.9052	0.676433		0.419516	0.217426	0.520813	3.34539e-06
AQP3	aquaporin 3 (Gill blood group)	46.2003	30.4579	0.81039	0.275525		61.1195	31.7545	0.517524	4.0407e-07
SULT2A1	sulfotransferase family 2A member 1	48.1561	43.0193	0.98562	0.961433		79.3557	40.8658	0.517265	6.70541e-05
MAP7D2	MAP7 domain containing 2	0.557258	0.489085	0.921309	0.730953		0.813457	0.41857	0.516616	4.20068e-07
LIPA	lipase A, lysosomal acid type	113.616	79.3931	0.849394	0.389117		163.858	89.4232	0.516484	1.40585e-10
ATP1B3	ATPase Na+/K+ transporting subunit beta 3	69.081	53.5604	0.858624	0.358867		87.0401	47.7805	0.516344	1.82141e-21
LYPD8	LY6/PLAUR domain containing 8	23.5705	1.99861	0.598256	0.000989675		5.1277	2.6286	0.515503	0.00034117
SAT2	spermidine/spermine N1-acetyltransferase family member 2	93.367	94.0247	1.05293	0.835375		163.77	84.9683	0.515475	1.41882e-10
MST1	macrophage stimulating 1	24.1587	17.5435	0.869878	0.537117		38.9459	20.7805	0.513946	1.20804e-06
ANXA13	annexin A13	105.028	85.1774	0.97096	0.916714		191.884	83.3985	0.512776	0.000491283
SLC1A7	solute carrier family 1 member 7	4.92522	3.1401	0.787518	0.218858		5.28731	2.72221	0.512592	2.97623e-08
SLC2A12	solute carrier family 2 member 12	14.5981	8.63213	0.778247	0.196266		22.8727	12.6304	0.512133	6.07279e-08
KRT72	keratin 72	0.921378	0.624805	0.858055	0.486494		1.46401	0.717209	0.512108	0.000298936
G0S2	G0/G1 switch 2	3.45015	2.40126	0.776129	0.138354		5.33934	2.73408	0.51189	9.70899e-07
SLC25A5-AS1	SLC25A5 antisense RNA 1	10.334	8.18722	0.845494	0.269668		15.2099	7.55691	0.511808	3.59642e-13
HAPLN2	hyaluronan and proteoglycan link protein 2	2.60881	1.84069	0.888376	0.603464		4.8841	2.55725	0.508298	6.50105e-06
CA4	carbonic anhydrase 4	18.9848	1.36334	0.609076	0.00132541		2.60406	1.25411	0.508175	1.2068e-06
WIF1	WNT inhibitory factor 1	0.103174	0.0684457	0.908364	0.65505		0.274568	0.0782671	0.508046	0.00268779
ENPEP	glutamyl aminopeptidase	57.7569	46.6399	0.94421	0.821098		102.096	49.1711	0.507201	9.10153e-05
MAMDC4	MAM domain containing 4	8.7269	6.23862	0.817205	0.223608		11.7992	6.37158	0.504059	4.67198e-09
SLC5A1	solute carrier family 5 member 1	329.466	228.497	0.881541	0.580317		530.653	283.339	0.50244	2.91983e-10
WDR49	WD repeat domain 49	2.29306	1.50634	0.853218	0.469294		5.11514	2.21805	0.497833	0.000459204
SI	sucrase-isomaltase	1157.55	833.292	0.885687	0.601082		1863	919.085	0.496602	2.17971e-05
APOA4	apolipoprotein A4	3120.86	2319.2	0.930332	0.775974		5294.76	2688.95	0.496557	5.07808e-06
PRODH	proline dehydrogenase 1	16.6501	12.2882	0.898632	0.654336		32.4213	15.2481	0.496156	0.00011187
AGMO	alkylglycerol monooxygenase	8.50703	7.01522	0.932772	0.786377		16.4145	7.76463	0.495455	1.15873e-07
NEURL3	neuralized E3 ubiquitin protein ligase 3	0.81026	0.429272	0.723018	0.0739714		0.975267	0.434419	0.494386	2.64192e-05
EDN2	endothelin 2	2.61553	2.20509	0.847107	0.313236		4.30184	2.02873	0.494189	2.06891e-06
FBXO17	F-box protein 17	1.41228	1.07549	0.873877	0.537556		1.85412	0.893982	0.492395	9.04874e-09
UPK3A	uroplakin 3A	0.926383	0.815568	1.10501	0.68103		0.57104	0.135036	0.492367	0.00178324
GIMAP7	GTPase, IMAP family member 7	14.9987	8.77874	0.738534	0.094577		16.4682	8.13334	0.48899	1.22227e-10
RHBG	Rh family B glycoprotein (gene/pseudogene)	0.498756	0.278212	0.785466	0.216906		0.875226	0.364969	0.488928	0.000160639
WNT9B	Wnt family member 9B	1.18862	0.890648	0.897454	0.64697		2.42452	1.01412	0.488365	6.95093e-05
ABCC2	ATP binding cassette subfamily C member 2	32.7076	28.7723	0.977354	0.935722		55.3109	26.1922	0.487552	5.86131e-06
ACAA1	acetyl-CoA acyltransferase 1	82.7155	45.202	0.704172	0.00611087		99.4998	50.1346	0.486613	5.32518e-14
PIPOX	pipecolic acid and sarcosine oxidase	7.45781	5.65279	0.926061	0.765224		11.4253	5.53221	0.484852	1.34985e-07
LAMB4	laminin subunit beta 4	0.172276	0.146393	0.972989	0.926644		0.415884	0.165916	0.479559	9.10871e-05
TREH	trehalase	56.528	36.0337	0.86611	0.512266		90.8916	44.3161	0.47944	8.49029e-10
APOA1	apolipoprotein A1	2280.2	1578.37	0.914577	0.693518		4197.71	1913.92	0.478533	4.6618e-05
PLA2G4C	phospholipase A2 group IVC	5.40777	3.5245	0.767591	0.145467		6.57881	3.12425	0.478147	2.36001e-08
SLC5A12	solute carrier family 5 member 12	5.28514	3.96777	0.913645	0.709508		9.42998	3.43259	0.477241	0.000703321
ACOT12	acyl-CoA thioesterase 12	0.708032	0.233162	0.678709	0.0239155		0.566949	0.169258	0.476588	0.000281129
SLC22A7	solute carrier family 22 member 7	0.450436	0.32378	0.914005	0.717076		0.804001	0.332025	0.470722	3.19062e-05
SLC37A2	solute carrier family 37 member 2	8.66512	7.08544	0.954614	0.860596		14.9575	6.08811	0.467294	5.01337e-06
PCK1	phosphoenolpyruvate carboxykinase 1	191.711	138.859	0.836851	0.373579		395.093	182.586	0.466974	3.3971e-07
SOAT2	sterol O-acyltransferase 2	4.28298	3.07049	0.909399	0.67562		8.257	3.25244	0.462672	7.39411e-05
TERT	telomerase reverse transcriptase	0.583734	0.421024	0.917036	0.716379		0.73894	0.30639	0.458708	1.50523e-07
AQP10	aquaporin 10	81.311	53.5076	0.900339	0.625213		154.664	65.5201	0.454413	9.14944e-06
UGT2B7	UDP glucuronosyltransferase family 2 member B7	65.3208	48.6372	0.895435	0.638748		105.244	46.1449	0.451803	4.85217e-07
OXT	oxytocin/neurophysin I prepropeptide	2.54741	1.76953	0.879581	0.577857		4.28238	1.66481	0.451529	6.45966e-06
SLC23A1	solute carrier family 23 member 1	11.9429	8.94836	0.881562	0.572663		20.503	8.40212	0.450798	8.67915e-06
TMEM198	transmembrane protein 198	4.11129	3.84533	0.998357	0.996502		9.26215	4.0901	0.450097	7.15771e-11
ADORA2A-AS1	ADORA2A antisense RNA 1	2.56149	1.9329	0.921864	0.749144		5.3441	2.38934	0.445677	3.39025e-06
FTCD	formimidoyltransferase cyclodeaminase	1.27033	0.827959	0.849458	0.450592		2.20801	0.980398	0.444254	3.17823e-07
ABCG8	ATP binding cassette subfamily G member 8	18.8272	13.7903	0.893516	0.634194		24.9097	11.0945	0.443743	2.14313e-13
BEST4	bestrophin 4	10.1948	3.33606	0.647235	0.0104133		9.99906	4.13054	0.443663	6.37393e-06
SPANXN3	SPANX family member N3	0.667978	0.287228	0.809001	0.222165		1.11311	0.292078	0.443618	0.000222135
SLC2A5	solute carrier family 2 member 5	87.5187	82.3209	0.99246	0.981931		208.429	90.863	0.443413	2.2376e-07
TFEC	transcription factor EC	1.88177	1.44543	0.884083	0.531546		3.54061	1.51194	0.442949	1.94225e-10
DFNA5	DFNA5, deafness associated tumor suppressor	6.00467	3.85569	0.815177	0.324627		9.21838	4.13221	0.442914	3.0138e-08
HRCT1	histidine rich carboxyl terminus 1	5.69531	2.24124	0.740875	0.105003		5.1886	2.33233	0.442511	7.44191e-12
SLC5A11	solute carrier family 5 member 11	3.09841	2.40285	0.880601	0.56159		5.97456	2.86116	0.439632	5.56551e-08
UPB1	beta-ureidopropionase 1	3.47138	2.87698	0.957196	0.874503		7.19055	2.92613	0.436673	1.7902e-05
KCNG1	potassium voltage-gated channel modifier subfamily G member 1	1.24951	0.561592	0.716858	0.0677971		0.974765	0.348367	0.43609	1.0274e-07
CLRN1	clarin 1	0.392457	0.297245	0.894737	0.635044		0.858338	0.298401	0.434358	3.86904e-05
F13B	coagulation factor XIII B chain	1.6997	0.911869	0.839479	0.38595		2.90828	1.16724	0.423468	2.41084e-07
ABCB1	ATP binding cassette subfamily B member 1	27.2776	12.6152	0.61017	0.0007129		36.4289	15.4705	0.423232	2.6318e-13
ENPP7	ectonucleotide pyrophosphatase/phosphodiesterase 7	42.8002	24.1631	0.849235	0.404396		96.9451	29.3874	0.410892	1.5033e-05
MROH2A	maestro heat like repeat family member 2A	0.140484	0.130985	1.04564	0.873189		0.298463	0.0904732	0.408313	4.23993e-06
GUCA2B	guanylate cyclase activator 2B	61.1983	20.4471	0.617872	0.00387018		73.0412	22.2409	0.404149	4.27262e-06
B4GALNT2	beta-1,4-N-acetyl-galactosaminyltransferase 2	4.25866	0.974977	0.715873	0.0456324		1.73718	0.492509	0.403857	7.9982e-07
ABCG5	ATP binding cassette subfamily G member 5	33.2386	20.9454	0.859781	0.48434		46.3224	17.9448	0.38895	4.6963e-13
SLC2A7	solute carrier family 2 member 7	2.00596	1.34134	0.879861	0.561984		5.87201	2.13802	0.388691	7.10542e-09
BRINP3	BMP/retinoic acid inducible neural specific 3	1.72399	0.534232	0.700052	0.0364868		5.22551	1.01867	0.383065	1.16019e-05
AGXT2	alanine--glyoxylate aminotransferase 2	0.313437	0.242909	0.964583	0.898077		1.37427	0.311697	0.375812	1.40192e-07
RPL39	ribosomal protein L39	80.37	207.941	1.95198	5.53113e-08		88.2002	146.242	1.42648	0.00577242
MMP1	matrix metallopeptidase 1	9.45794	32.6816	1.86883	6.88458e-05		20.9296	21.3273	0.963794	0.907001
CCL24	C-C motif chemokine ligand 24	51.6733	108.528	1.84838	1.18012e-12		48.0459	65.8011	1.32494	0.00271548
KLK12	kallikrein related peptidase 12	5.00008	11.0738	1.80312	2.19812e-05		4.42919	7.3875	1.39864	0.0450699
CYP1A1	cytochrome P450 family 1 subfamily A member 1	1.7392	20.0154	1.66977	0.000731841		9.36755	4.54298	0.68145	0.11591
BCL2L1	BCL2 like 1	24.9856	44.216	1.6539	1.37593e-10		27.4521	42.895	1.44193	1.17584e-08
SLC25A17	solute carrier family 25 member 17	3.47483	5.97534	1.636	2.42598e-09		3.79019	5.43788	1.35163	2.15565e-05
KRT16	keratin 16	0.00358394	0.287714	1.56186	0.00129808		0.031925	0.129243	1.49639	0.076822
SFTA2	surfactant associated 2	0.0798607	0.949637	1.56121	0.00342393		0.227209	0.612151	1.40149	0.165208
FAM131B	family with sequence similarity 131 member B	0.364308	0.931455	1.55635	0.00920193		0.429068	0.727808	1.40205	0.0518222
SIRPB1	signal regulatory protein beta 1	0.169677	0.333118	1.54764	0.00303636		0.159468	0.264676	1.44075	0.0330358
CCR3	C-C motif chemokine receptor 3	0.625061	1.11662	1.5403	0.00245109		0.692678	1.00181	1.26262	0.116
PITX2	paired like homeodomain 2	0.0364868	0.25286	1.5394	0.00592723		0.189943	0.161462	0.963098	0.890047
TIMM9	translocase of inner mitochondrial membrane 9	8.92038	15.8246	1.53804	4.00513e-06		8.02792	13.0122	1.4395	9.63053e-06
HSP90AB1	heat shock protein 90kDa alpha family class B member 1	128.281	217.373	1.53787	1.5001e-06		122.066	181.639	1.37195	4.69931e-08
REG4	regenerating family member 4	112.93	342.788	1.53734	0.0118167		160.539	267.023	1.44318	0.00337712
MMACHC	methylmalonic aciduria (cobalamin deficiency) cblC type, with homocystinuria	8.15111	12.7282	1.5356	5.03607e-11		8.59666	10.9673	1.19944	0.0110205
STC1	stanniocalcin 1	0.354996	0.81072	1.53287	0.0118708		0.53758	0.686044	1.19094	0.402469
SNRPE	small nuclear ribonucleoprotein polypeptide E	5.79404	9.76689	1.53277	4.17903e-05		6.32697	7.86567	1.15999	0.0576544
C17orf49	chromosome 17 open reading frame 49	15.5349	25.1686	1.52803	7.26461e-11		14.69	23.2604	1.46571	4.41081e-07
CLDN9	claudin 9	0.157605	0.331092	1.52193	0.0131491		0.16853	0.302008	1.43154	0.0993687
LINC00473	long intergenic non-protein coding RNA 473	0.107307	0.271086	1.51751	0.0149616		0.132578	0.155698	1.06368	0.836848
RPL13AP3	ribosomal protein L13a pseudogene 3	0.370107	0.928669	1.51564	0.0156231		0.539233	0.616922	1.07186	0.785978
KRT80	keratin 80	0.744151	1.67593	1.51284	0.0166124		1.137	1.67629	1.33269	0.0360798
NQO1	NAD(P)H quinone dehydrogenase 1	61.4183	127.991	1.50673	0.00041757		58.2792	102.665	1.49732	0.00202097
S100A8	S100 calcium binding protein A8	1.32147	3.21627	1.50398	0.0180919		1.44597	2.2632	1.26392	0.305958
ZNF438	zinc finger protein 438	2.7299	4.69483	1.50305	3.3591e-05		2.64698	4.36609	1.49034	1.14261e-08
CHRM5	cholinergic receptor muscarinic 5	0.331437	0.160042	0.667381	0.0193844		0.172596	0.175272	0.97459	0.931576
SLC26A2	solute carrier family 26 member 2	75.2963	15.4161	0.666977	0.0179622		16.9367	15.2338	0.848216	0.0727473
SPINK5	serine peptidase inhibitor, Kazal type 5	2.12847	0.48873	0.666956	0.020142		0.700277	0.757025	0.928045	0.688562
DST	dystonin	34.8704	21.2435	0.664436	1.17604e-08		32.9609	26.3162	0.733947	1.97061e-05
CCDC144CP	coiled-coil domain containing 144C, pseudogene	0.257924	0.127669	0.664425	0.0126021		0.26573	0.192807	0.70198	0.0332255
LPAR3	lysophosphatidic acid receptor 3	0.425475	0.157925	0.662466	0.0173362		0.208044	0.180661	0.850037	0.542905
SCEL	sciellin	0.738385	0.0839909	0.662198	0.0112578		0.0740833	0.0912083	1.07772	0.801703
XIST	X inactive specific transcript (non-protein coding)	22.3301	10.3288	0.661584	0.0111724		19.6991	33.1125	1.37393	0.00604252
DCAF13P3	DDB1 and CUL4 associated factor 13 pseudogene 3	0.982882	0.596743	0.661101	0.00482246		0.592886	0.706907	1.08622	0.646311
UPK1B	uroplakin 1B	0.540902	0.233929	0.661071	0.0163472		0.24469	0.361561	1.26098	0.331559
LOC100335030	#N/A	0.746955	0.487157	0.660521	0.00314773		0.410542	0.562469	1.23327	0.206279
LOC100131257	#N/A	0.267095	0.139817	0.659742	0.00974941		0.110689	0.164523	1.35355	0.0181762
HIATL2	#N/A	1.80304	1.16518	0.658831	0.00366256		1.30307	1.29962	0.925838	0.688562
TMIGD1	transmembrane and immunoglobulin domain containing 1	16.5738	0.0962159	0.65801	0.000182445		0.273977	0.16198	0.705643	0.158038
TSIX	TSIX transcript, XIST antisense RNA	7.68743	3.40062	0.656209	0.00856517		6.883	9.48432	1.18554	0.130071
GDNF	glial cell derived neurotrophic factor	0.651525	0.387714	0.655729	0.0018891		0.490387	0.512063	0.965715	0.851547
RNF138P1	ring finger protein 138 pseudogene 1	3.39317	1.94038	0.655303	0.00203736		2.40703	2.4628	0.927334	0.576226
IGFBP7-AS1	IGFBP7 antisense RNA 1	23.2425	12.3832	0.654469	0.00945732		21.6128	16.3071	0.710728	0.0144147
GRIA3	glutamate ionotropic receptor AMPA type subunit 3	0.586462	0.349362	0.654304	0.00172811		0.365152	0.41587	1.03661	0.857249
REREP3	#N/A	1.71589	0.752433	0.654257	0.0122613		0.941044	0.455406	0.636832	0.0508441
LINC00704	long intergenic non-protein coding RNA 704	0.984672	0.399709	0.653701	0.00938978		0.711834	0.490946	0.67839	0.0500602
CLEC4F	C-type lectin domain family 4 member F	2.24533	1.03943	0.652777	0.00986758		2.02215	1.58797	0.698358	0.00492653
UPF3B	UPF3 regulator of nonsense transcripts homolog B (yeast)	4.21597	2.71172	0.651539	7.45822e-07		3.82822	2.84668	0.702378	0.000135667
AC008703.1	0	0.295049	0.116258	0.650026	0.0114021		0.163716	0.145178	0.878596	0.625739
BRSK2	BR serine/threonine kinase 2	0.46968	0.273265	0.649962	0.00151786		0.287737	0.307706	0.954534	0.816363
ANKRD20A4	ankyrin repeat domain 20 family member A4	0.305036	0.101697	0.649641	0.0117134		0.163319	0.121581	0.790133	0.327922
MYBPC1	myosin binding protein C, slow type	0.400146	0.0663527	0.649075	0.00972679		0.0881485	0.0758292	0.852414	0.541421
FLJ42393	uncharacterized LOC401105	2.08801	1.20454	0.648813	0.00348754		1.06689	1.50347	1.24385	0.142108
LAMC3	laminin subunit gamma 3	0.405006	0.165969	0.647526	0.0111057		0.289635	0.344629	1.06069	0.792044
ADGB	androglobin	0.106308	0.00564275	0.646636	0.00113356		0.00289244	0.00717782	1.07536	0.677185
LOC100507156	#N/A	0.610331	0.387891	0.640743	0.00134053		0.367671	0.451326	1.10493	0.549103
ANKRD44-IT1	ANKRD44 intronic transcript 1	2.13781	1.17927	0.638574	0.00133275		1.23603	1.49921	1.11553	0.53439
GPR98	#N/A	0.38828	0.180169	0.63589	0.00475397		0.379715	0.254476	0.710476	0.0294429
MALAT1	Metastasis associated lung adenocarcinoma transcript 1	846.599	525.818	0.633189	0.000208538		523.851	508.721	0.88762	0.3483
PYY	peptide YY	8.88529	2.37575	0.631871	0.00592723		2.39575	1.88761	0.777453	0.189432
PTGDR	prostaglandin D2 receptor (DP)	2.40294	0.66615	0.631367	0.00592723		0.907709	0.668311	0.714637	0.0134441
RYR1	ryanodine receptor 1	0.423109	0.193418	0.623992	0.00362319		0.360493	0.290144	0.76645	0.0809669
ABCA9	ATP binding cassette subfamily A member 9	1.10782	0.641913	0.623665	0.000102206		0.834122	0.69628	0.768856	0.00988505
SLC17A4	solute carrier family 17 member 4	21.767	12.1861	0.620333	2.99663e-05		16.1588	12.5087	0.725768	4.50659e-06
KNG1	kininogen 1	0.398119	0.0762367	0.615089	0.00303391		0.13271	0.0885981	0.715279	0.131172
C2orf61	chromosome 2 open reading frame 61	0.451146	0.21699	0.611263	0.00151779		0.31018	0.31936	0.96833	0.904814
RP11-43N5.1	0	0.624542	0.153943	0.610126	0.00293703		0.152159	0.162224	0.990921	0.977015
SCNN1B	sodium channel epithelial 1 beta subunit	4.2242	0.77244	0.608825	0.00284528		0.776897	0.835386	1.0149	0.943099
TMEM14E	#N/A	12.4798	7.3052	0.607863	1.16922e-06		6.62875	8.27084	1.15129	0.281858
NOX1	NADPH oxidase 1	5.38567	0.200932	0.601153	0.000571881		0.120112	0.176618	1.18092	0.508718
C1QTNF7	C1q and tumor necrosis factor related protein 7	0.874034	0.437188	0.594963	0.000202547		0.81182	0.620499	0.715281	0.0136516
LINC00115	long intergenic non-protein coding RNA 115	1.13252	0.578036	0.592875	0.000282348		0.869282	0.631134	0.745137	0.113175
LOC340074	#N/A	0.476079	0.143764	0.583465	0.000959054		0.308281	0.251973	0.787794	0.263307
LOC644172	#N/A	0.421266	0.190851	0.583423	0.000218032		0	0	0	0.999916
RP11-542B15.1	0	0.436736	0.0485057	0.58157	0.000347484		0.0902907	0.0837812	0.892964	0.694368
ERVW-1	endogenous retrovirus group W member 1	0.489226	0.228419	0.576296	0.00025531		0.225345	0.291315	1.12138	0.594863
NXPE1	neurexophilin and PC-esterase domain family member 1	18.3249	1.26261	0.571476	0.000427037		1.31998	1.29923	0.915205	0.62857
MYEF2	myelin expression factor 2	1.73323	0.919855	0.561252	6.01709e-07		1.14239	0.982234	0.804409	0.0686414
CWH43	cell wall biogenesis 43 C-terminal homolog	3.28312	0.134262	0.560808	3.4038e-05		0.107496	0.406272	1.52477	0.0713331
NXPE4	neurexophilin and PC-esterase domain family member 4	13.2965	0.396051	0.558316	3.3591e-05		0.439319	0.491937	1.04744	0.843507
CA1	carbonic anhydrase 1	129.954	4.22461	0.557737	0.000103069		1.80985	2.59854	1.26288	0.0808281
CD177	CD177 molecule	40.3001	0.128865	0.538317	3.58719e-07		0.0338043	0.0871332	1.35527	0.220813
MUC12	mucin 12, cell surface associated	9.8479	0.178163	0.538114	1.35872e-05		0.153441	0.243339	1.44638	0.0115811
MUC5B	mucin 5B, oligomeric mucus/gel-forming	2.93374	0.0286849	0.529286	1.31402e-06		0.0298875	0.0459319	1.23426	0.383881
GDPD4	glycerophosphodiester phosphodiesterase domain containing 4	0.218937	0.039602	0.521877	1.58657e-05		0.0574349	0.0612671	1.00957	0.97927
MS4A12	membrane spanning 4-domains A12	30.2181	0.104734	0.515508	7.46974e-08		0.116856	0.152161	1.08102	0.795783
CLCA4	chloride channel accessory 4	156.251	0.134656	0.509404	1.66243e-08		0.129148	0.0991915	0.834572	0.500349
CDHR1	cadherin related family member 1	3.41087	0.0546023	0.502883	7.50711e-07		0.0361971	0.0440285	1.08382	0.770929
CEACAM7	carcinoembryonic antigen related cell adhesion molecule 7	108.182	0.327917	0.492163	1.42994e-08		0.16354	0.413179	1.55165	0.0566126

## Sheet: BaseEndMinus2mmPolyp
Gene Name	Description	RPKM_DrugNormBase	RPKM_DrugPolypEnd	DrugPolypEndBase_Fold	DrugPolypEndBase_FDR		RPKM_PlaceboNormBase	RPKM_PlaceboPolypEnd	PlaceboPolypEndBase_Fold	PlaceboPolypEndBase_FDR
CAPN6	calpain 6	0.682524	1.57314	1.20878	0.394753		0.164535	2.25493	8.47647	4.03352e-32
PRR4	proline rich 4 (lacrimal)	12.4204	25.9529	1.15032	0.505065		1.39921	47.8362	7.2077	6.51634e-19
ARHGAP40	Rho GTPase activating protein 40	0.661189	0.50584	0.951096	0.812768		0.0305473	0.64401	6.01842	1.09691e-14
RP11-474D1.3		0.404343	0.336955	0.947121	0.827362		0.0175266	0.512088	5.93481	1.30839e-15
GLP1R	glucagon like peptide 1 receptor	2.74179	2.36883	0.948014	0.827362		0.26957	2.1176	5.85246	1.89778e-20
AC104654.1		0.890459	1.6769	1.24435	0.324863		0.0785944	1.22155	5.81907	8.43554e-16
ATP6V0A4	ATPase H+ transporting V0 subunit a4	0.155468	0.177686	1.01816	0.945638		0.0237601	0.3699	5.59888	3.03615e-15
CCKAR	cholecystokinin A receptor	2.96506	3.30826	0.996011	0.986263		0.131378	3.63214	5.57114	2.84363e-13
SLC9A4	solute carrier family 9 member A4	2.67881	2.21015	0.961684	0.856451		0.0877675	2.69362	5.47125	6.99309e-13
KCNE2	potassium voltage-gated channel subfamily E regulatory subunit 2	10.2374	8.5304	0.952766	0.83255		1.5719	13.0536	5.36615	8.1842e-23
NWD1	NACHT and WD repeat domain containing 1	0.116384	0.354456	1.43164	0.0846603		0.023183	0.313336	5.32465	2.71154e-14
CXCL17	C-X-C motif chemokine ligand 17	0.698379	1.39687	1.15336	0.488152		0.05896	1.53048	5.25619	1.51791e-12
TMEM213	transmembrane protein 213	0.192277	0.330037	1.14197	0.581606		0.0750785	0.571786	4.8816	1.34165e-15
MUC1	mucin 1, cell surface associated	5.0906	8.0242	1.15183	0.561298		1.12771	13.357	4.72595	1.01524e-11
GP2	glycoprotein 2	44.5779	75.593	1.09219	0.670002		4.90642	102.255	4.67763	6.44877e-11
DCHS2	dachsous cadherin-related 2	1.10629	1.22996	1.01989	0.937754		0.119107	1.20359	4.66308	9.5266e-12
HABP2	hyaluronan binding protein 2	3.59145	3.58468	0.980139	0.943223		0.483293	5.05636	4.62542	1.17777e-12
VTCN1	V-set domain containing T cell activation inhibitor 1	0.203597	0.444353	1.19089	0.448685		0.0491384	0.550734	4.56487	1.27594e-11
VEPH1	ventricular zone expressed PH domain containing 1	0.314106	0.274286	0.933333	0.790259		0.0330046	0.334632	4.55355	3.35627e-12
CCNO	cyclin O	0.60246	1.3043	1.38724	0.130937		0.103315	1.33548	4.4517	1.28066e-11
GLYATL2	glycine-N-acyltransferase like 2	0.203819	0.407802	1.11666	0.58383		0.0160595	0.463799	4.38591	5.43176e-10
CDR1	cerebellar degeneration related protein 1	2.70846	5.1599	1.12328	0.591014		0.670641	5.57869	4.24128	8.19668e-11
CLDN1	claudin 1	0.706716	3.07197	1.89607	0.000566272		0.578477	3.31782	4.18941	2.01498e-17
PSCA	prostate stem cell antigen	0.993198	1.51756	1.2268	0.380337		0.360267	2.40664	4.16619	8.2311e-13
SERPINB7	serpin family B member 7	0.0440752	0.186071	1.2333	0.999893		0.00870732	0.404601	4.12622	4.44314e-09
ZG16B	zymogen granule protein 16B	18.4155	17.5001	0.980194	0.946471		4.22872	20.5715	4.09318	9.64734e-18
CYP4X1	cytochrome P450 family 4 subfamily X member 1	2.06766	4.68506	1.39747	0.121281		0.833576	4.28432	4.07283	5.17577e-20
COLCA1	colorectal cancer associated 1	3.6553	8.14053	1.41933	0.0963639		1.1897	6.629	4.0131	2.1316e-13
PKHD1	polycystic kidney and hepatic disease 1 (autosomal recessive)	0.0860728	0.176412	1.17919	0.480771		0.0165744	0.298071	3.97455	7.58267e-09
CLDN10	claudin 10	0.862193	0.715573	0.963784	0.864124		0.0563768	1.43197	3.94909	1.15803e-08
ATP13A4	ATPase 13A4	1.17483	0.983471	0.951685	0.842894		0.163707	1.35015	3.92374	1.08111e-09
TFCP2L1	transcription factor CP2-like 1	0.813991	1.57725	1.31742	0.212281		0.326727	1.95997	3.92363	2.61413e-17
FOXQ1	forkhead box Q1	8.85465	17.0563	1.4305	0.0522754		4.852	19.7419	3.8976	3.62635e-22
C17orf77	chromosome 17 open reading frame 77	0.126272	0.505469	1.34571	0.114524		0.0222774	0.48855	3.87626	1.44086e-08
PRH1-PRR4		7.09873	12.7506	1.18547	0.470449		2.79495	20.2581	3.82895	1.52767e-11
DPCR1	diffuse panbronchiolitis critical region 1	0.117713	2.97497	1.45429	0.0263049		0.0938843	5.57522	3.8275	3.25032e-08
KSR2	kinase suppressor of ras 2	0.104031	0.198167	1.34148	0.127133		0.0354513	0.163717	3.80919	3.87442e-17
VSIG2	V-set and immunoglobulin domain containing 2	14.8134	36.6333	1.32406	0.193343		3.74039	33.7299	3.793	1.65222e-08
VSIG1	V-set and immunoglobulin domain containing 1	1.64743	3.24939	1.25597	0.320343		1.01133	5.07459	3.70402	8.50436e-17
FAM189A2	family with sequence similarity 189 member A2	1.5879	2.13003	1.08089	0.775851		0.551261	2.60922	3.61168	1.57325e-15
AQP2	aquaporin 2	0.080546	0.270361	1.22444	0.27765		0	0.0994161	3.60109	1.40143e-07
CLDN18	claudin 18	2.15225	2.50076	1.06717	0.809626		0.662692	7.22563	3.51402	1.34977e-07
MCIDAS	multiciliate differentiation and DNA synthesis associated cell cycle protein	0.0453408	0.247762	1.44987	0.999893		0.00279413	0.209516	3.50969	2.56799e-07
FREM2	FRAS1 related extracellular matrix protein 2	0.350995	0.423556	1.06974	0.809011		0.141474	0.502825	3.50858	5.06782e-17
PGA3	pepsinogen 3, group I (pepsinogen A)	0.0253097	1.81361	1.06288	0.999893		0.021437	0.452724	3.49441	2.64583e-07
SULT1C2P1	sulfotransferase family 1C member 2 pseudogene 1	0.369514	0.339924	0.946729	0.842852		0.214304	0.773681	3.47365	1.69323e-09
ERBB4	erb-b2 receptor tyrosine kinase 4	0.100249	0.113952	1.01402	0.958817		0.023298	0.137606	3.46684	1.58056e-09
C14orf105	chromosome 14 open reading frame 105	1.13274	2.90063	1.44952	0.0785353		0.438102	3.09589	3.44485	2.78662e-08
NANOS3	nanos C2HC-type zinc finger 3	0.427406	3.3922	2.08505	4.80367e-05		0.315433	2.12528	3.43984	4.75225e-10
SERPINA5	serpin family A member 5	3.3354	3.83027	1.02118	0.928439		0.180631	3.45114	3.43633	4.34634e-07
FMOD	fibromodulin	27.4496	36.7163	1.04823	0.857626		6.58882	37.1345	3.42949	7.69326e-10
TENM3	teneurin transmembrane protein 3	2.42026	3.45535	1.30405	0.141466		0.80997	4.4152	3.42362	1.69421e-08
C2orf66	chromosome 2 open reading frame 66	0.0923673	0.339673	1.45057	0.0639269		0.0500075	0.304559	3.41685	2.34346e-07
CCAT1	colon cancer associated transcript 1 (non-protein coding)	0.354841	3.25646	1.56443	0.0170566		0.29226	1.44927	3.41368	2.21467e-10
ENTPD3	ectonucleoside triphosphate diphosphohydrolase 3	1.51603	1.84592	1.02348	0.935068		0.385994	2.2406	3.3996	9.07724e-11
SLC16A2	solute carrier family 16 member 2	2.809	6.82064	1.58885	0.0123128		1.31614	7.50144	3.39541	1.14078e-09
FUT9	fucosyltransferase 9	1.83084	1.35722	0.954634	0.800866		0.0717096	1.98245	3.37836	5.99131e-07
RP1-60O19.1		0.199571	0.437515	1.20571	0.369499		0.0242683	0.456209	3.37537	5.86038e-07
SLPI	secretory leukocyte peptidase inhibitor	3.5496	11.5327	1.33777	0.148523		0.843699	10.8974	3.37184	6.01943e-07
CEACAM5	carcinoembryonic antigen related cell adhesion molecule 5	18.112	38.5645	1.62133	0.00474054		12.885	50.0475	3.36383	2.68299e-22
CLDN2	claudin 2	9.90535	29.5631	1.49006	0.0537901		3.20265	21.8421	3.33199	2.0046e-07
GIF	gastric intrinsic factor	1.88714	1.36716	0.898125	0.667654		0.22514	1.60145	3.31138	1.15201e-07
CRISP2	cysteine rich secretory protein 2	0.366604	0.493448	1.04224	0.999893		0.0554185	0.697054	3.2953	5.42304e-07
FOXC1	forkhead box C1	0.931857	1.89141	1.27667	0.282251		0.291999	1.19929	3.25684	2.13414e-11
DCDC2	doublecortin domain containing 2	0.510643	0.684215	1.06218	0.799624		0.0838317	0.485691	3.25569	5.6215e-08
SPATA12	spermatogenesis associated 12	0.0852753	0.508939	1.92854	0.000386288		0.0514501	0.401452	3.23432	2.34346e-07
SOX9	SRY-box 9	11.0294	26.3219	1.59028	0.0119203		5.86783	22.1609	3.232	8.44327e-17
UNC5A	unc-5 netrin receptor A	0.335586	0.420404	1.01005	0.974033		0.0759944	0.373572	3.23047	2.83234e-08
S100A11	S100 calcium binding protein A11	40.4687	193.208	2.527	1.99955e-09		39.0391	176.896	3.22782	6.72312e-21
HS6ST3	heparan sulfate 6-O-sulfotransferase 3	0.595171	0.735082	1.09523	0.714406		0.187969	0.632241	3.22177	9.9036e-11
KCNN4	potassium calcium-activated channel subfamily N member 4	5.87167	10.705	1.22621	0.375935		1.56014	9.53353	3.2113	1.83543e-07
SYNPR	synaptoporin	0.230375	0.471547	1.24065	0.332118		0.0738372	0.451976	3.19774	1.15989e-06
KCNJ15	potassium voltage-gated channel subfamily J member 15	0.57782	0.789787	1.02854	0.890643		0.0572543	1.36346	3.19586	2.16217e-06
NRAP	nebulin related anchoring protein	0.188062	0.206312	1.0293	0.922407		0.0545128	0.264441	3.19399	4.91637e-08
CD24	CD24 molecule	48.8184	190.71	1.8306	0.000963065		33.8373	156.553	3.19206	2.1429e-09
TNS4	tensin 4	0.375282	6.52172	1.74785	0.00153198		0.219909	3.99653	3.18231	2.38575e-06
VWA2	von Willebrand factor A domain containing 2	2.45124	4.97147	1.45266	0.0490665		1.05458	3.91204	3.17476	2.41935e-16
PRSS22	protease, serine 22	0.696848	1.55225	1.34287	0.179245		0.277277	1.35084	3.13612	6.09933e-08
SERPINA4	serpin family A member 4	5.36617	4.35326	0.964702	0.857108		0.134304	5.46736	3.1255	3.08196e-06
CALN1	calneuron 1	0.0466656	0.0635915	1.02377	0.999893		0.00344925	0.0766037	3.09313	4.13268e-06
ECM1	extracellular matrix protein 1	3.31073	13.7784	2.30105	2.79728e-07		2.85819	12.6469	3.0474	3.05713e-13
SLC38A11	solute carrier family 38 member 11	4.35779	6.3209	1.17776	0.423367		2.26379	7.73398	3.04557	7.88559e-13
SIX4	SIX homeobox 4	0.251823	0.408794	1.19634	0.44971		0.116385	0.453737	3.02854	2.33998e-14
RASAL1	RAS protein activator like 1	0.64566	2.51787	1.50295	0.0457524		0.363261	2.1488	3.0197	1.60746e-06
RETNLB	resistin like beta	10.6056	40.674	1.70006	0.00675165		5.54724	15.4564	3.01498	3.8464e-11
SOD3	superoxide dismutase 3, extracellular	5.77689	7.48958	1.12046	0.647644		1.84647	7.81739	3.00364	6.6303e-14
CHRM1	cholinergic receptor muscarinic 1	0.192286	0.271037	1.0633	0.821707		0.0675219	0.353262	2.98718	2.14101e-07
REPS2	RALBP1 associated Eps domain containing 2	3.96717	8.74282	1.56382	0.00335204		2.48891	8.83232	2.95144	8.21421e-16
GLIS3	GLIS family zinc finger 3	1.29949	2.18281	1.21196	0.407772		0.525981	2.08908	2.95069	1.49665e-17
EPHB1	EPH receptor B1	0.625293	2.36125	1.96479	0.000188663		0.300322	2.76651	2.94724	6.91219e-06
C15orf54	chromosome 15 open reading frame 54	0.258008	0.461285	1.16366	0.535007		0.0903009	0.580203	2.94575	6.17846e-06
RP11-364P22.1		0.00627076	0.179772	1.38288	0.999893		0	0.337289	2.94041	1.00836e-05
GDF15	growth differentiation factor 15	3.90362	12.9726	1.37878	0.1186		2.31264	12.161	2.93158	1.74975e-06
GKN2	gastrokine 2	0.318723	1.39291	1.2035	0.293076		0.364174	15.2902	2.92319	1.19376e-05
SCGB2A1	secretoglobin family 2A member 1	0.860784	0.947507	1.0293	0.917563		0.247769	1.11672	2.90817	5.78302e-06
SYNPR-AS1	SYNPR antisense RNA 1	0.701993	1.31711	1.26718	0.299718		0.22427	1.06021	2.90318	6.72993e-06
C2orf70	chromosome 2 open reading frame 70	0.29451	0.886388	1.29104	0.223289		0.0417803	0.519996	2.88729	1.74144e-05
TCN1	transcobalamin 1	14.5239	16.4436	1.02887	0.900784		0.716344	37.0681	2.87876	1.46039e-05
ZBTB7C	zinc finger and BTB domain containing 7C	2.30238	6.61179	1.59889	0.0140393		1.45186	4.92233	2.86509	6.4299e-11
CREB3L1	cAMP responsive element binding protein 3 like 1	7.74855	17.929	1.47903	0.0479123		4.96289	16.167	2.86061	5.99064e-14
CCKBR	cholecystokinin B receptor	0.114134	0.149854	1.0297	0.999893		0.0229983	0.257555	2.84399	1.78008e-05
AK4	adenylate kinase 4	2.19505	5.18597	1.28935	0.251324		0.713624	4.3046	2.84001	4.23042e-06
C16orf89	chromosome 16 open reading frame 89	8.66823	6.33878	0.927217	0.737458		1.33763	9.55892	2.82593	1.27241e-05
NME5	NME/NM23 family member 5	0.469245	0.861634	1.25167	0.326699		0.284173	0.951634	2.82289	2.13939e-07
NXF3	nuclear RNA export factor 3	0.439757	2.26877	1.32797	0.125037		0.0916419	1.21336	2.81145	2.97504e-05
KLK11	kallikrein related peptidase 11	0.942307	4.46014	2.10902	2.70424e-05		0.820827	3.10295	2.80655	5.07942e-08
GOLM1	golgi membrane protein 1	210.714	216.033	0.963865	0.895848		93.1062	319.597	2.80372	1.24806e-08
CLIC6	chloride intracellular channel 6	1.04469	1.55578	1.13219	0.623326		0.437808	1.74883	2.79737	1.08045e-08
SLC35E4	solute carrier family 35 member E4	0.857114	2.22296	1.53201	0.0373198		0.81957	2.8738	2.78891	9.54115e-08
RIMKLA	ribosomal modification protein rimK-like family member A	0.598399	1.04105	1.32812	0.133953		0.374212	1.04362	2.78776	6.8764e-12
FBP2	fructose-bisphosphatase 2	4.60532	9.34459	1.2975	0.229152		2.71519	9.83422	2.78674	2.62936e-07
A4GNT	alpha-1,4-N-acetylglucosaminyltransferase	3.64523	4.46754	1.01944	0.924285		0.13223	7.84649	2.78535	2.61205e-05
ACPP	acid phosphatase, prostate	0.82504	1.87984	1.38148	0.126553		0.456463	1.81926	2.78353	1.52574e-08
F5	coagulation factor V	1.03501	2.60693	1.18823	0.455694		0.401248	1.21827	2.78158	6.27622e-15
SULT1C2	sulfotransferase family 1C member 2	7.95535	12.528	1.28702	0.258296		7.94729	22.0868	2.77784	2.34346e-07
CTNNA2	catenin alpha 2	0.534309	0.604966	1.02973	0.916917		0.19736	0.65378	2.77467	1.78097e-07
NPIPB3	nuclear pore complex interacting protein family member B3	0.210803	0.337953	1.21987	0.386873		0.100785	0.506161	2.76967	1.02868e-07
FRAS1	Fraser extracellular matrix complex subunit 1	0.717253	1.01003	1.14442	0.512729		0.398731	1.4149	2.76142	1.98592e-12
ANKRD22	ankyrin repeat domain 22	1.94844	6.56271	1.77692	0.00226533		1.59231	4.88774	2.75893	1.62937e-10
PDILT	protein disulfide isomerase like, testis expressed	0.150657	0.402959	1.15063	0.44592		0.00281392	0.195885	2.75239	3.23171e-05
MFSD4	#N/A	1.92063	2.00153	0.966191	0.905734		0.683717	2.4347	2.74846	1.88442e-11
PRSS21	protease, serine 21	0.693186	1.15988	1.17864	0.4848		0.327688	1.62025	2.74362	6.56319e-06
CA12	carbonic anhydrase 12	0.310686	3.10525	1.78075	0.00153598		0.311093	2.03495	2.729	2.99013e-05
FOXA2	forkhead box A2	2.42766	3.87235	1.25689	0.28063		1.11223	3.57768	2.72864	7.17924e-13
TESC	tescalcin	6.62156	12.9953	1.25633	0.309539		2.56544	10.108	2.72557	2.3246e-08
GABRB3	gamma-aminobutyric acid type A receptor beta3 subunit	1.50343	1.99976	1.08714	0.73711		0.533942	2.18481	2.72059	1.66416e-05
KIF26B	kinesin family member 26B	0.514298	0.68505	1.11058	0.685509		0.263211	0.949552	2.71611	1.48513e-07
NFIC	nuclear factor I C	2.49088	5.52889	1.63016	0.00146542		1.65287	5.24786	2.70926	2.1505e-23
RP11-793H13.3	0	2.11451	4.53831	1.51682	0.0132946		1.28108	4.48452	2.70797	2.40853e-15
PLCB4	phospholipase C beta 4	2.35343	6.38832	1.37344	0.142633		1.07991	4.80571	2.70327	9.9804e-07
MYADM	myeloid-associated differentiation marker	3.73154	7.45622	1.54948	0.0183535		2.67884	8.54877	2.69296	6.39513e-20
FOSL1	FOS like 1, AP-1 transcription factor subunit	0.123058	2.11196	1.8716	0.00046524		0.148457	0.921606	2.69024	1.14616e-05
GLIS3-AS1	GLIS3 antisense RNA 1	0.479015	0.478778	0.96014	0.999893		0.108216	0.744409	2.68937	4.06269e-05
PBOV1	prostate and breast cancer overexpressed 1	0.319223	0.444806	1.05347	0.850737		0.139544	0.470387	2.67876	4.68564e-06
GABRA5	gamma-aminobutyric acid type A receptor alpha5 subunit	0.0865432	0.178819	1.04543	0.999893		0.00565387	0.0989655	2.67288	6.84842e-05
GRIN2B	glutamate ionotropic receptor NMDA type subunit 2B	0.330545	0.88347	1.37679	0.116089		0.0808033	0.573377	2.67172	6.41194e-05
SLC11A2	solute carrier family 11 member 2	56.0827	86.4999	1.23086	0.372614		52.901	80.8315	2.66948	5.92431e-06
SLC28A3	solute carrier family 28 member 3	0.938796	1.68582	1.27573	0.275952		0.432484	1.45431	2.66585	9.59625e-14
CAPN11	calpain 11	0.118215	0.330366	1.31289	0.214214		0.0273553	0.275224	2.66119	4.9572e-05
AP000330.8	#N/A	0.405883	0.594741	1.18329	0.461575		0.157714	0.645784	2.65962	5.53372e-08
MARCH4	membrane associated ring-CH-type finger 4	0.240585	0.391573	1.20209	0.375092		0.114651	0.305028	2.65776	3.52197e-07
ERN2	endoplasmic reticulum to nucleus signaling 2	10.8074	18.3949	1.3041	0.183032		6.08431	16.8924	2.6537	2.25571e-14
LONRF2	LON peptidase N-terminal domain and ring finger 2	0.577087	0.662997	0.981272	0.947949		0.23021	0.651091	2.64679	1.91875e-09
SERPING1	serpin family G member 1	6.41318	12.8607	1.56264	0.00558848		4.45753	14.3393	2.64605	1.03305e-33
DPPA3	developmental pluripotency associated 3	0.172592	0.417795	1.03184	0.999893		0	0.350773	2.64016	6.71487e-05
NOL4	nucleolar protein 4	0.0660867	0.122848	1.15736	0.540276		0.0311859	0.142881	2.6362	3.73988e-05
KIAA1244	#N/A	5.76884	10.0522	1.25836	0.23859		2.83374	8.94581	2.63412	4.45365e-13
ALDH1L1	aldehyde dehydrogenase 1 family member L1	0.135141	0.28058	1.26295	0.307503		0.0798258	0.371429	2.63364	1.30974e-05
SCGB3A1	secretoglobin family 3A member 1	1.11702	1.02128	0.998146	0.991781		0.0256876	1.25703	2.63317	7.75485e-05
FUT1	fucosyltransferase 1 (H blood group)	1.52697	1.5552	0.995898	0.990006		0.492121	1.88106	2.6326	7.38406e-09
SERTAD4	SERTA domain containing 4	1.20502	2.03406	1.25187	0.310661		0.611781	1.56146	2.63049	7.47657e-09
FBXL13	F-box and leucine rich repeat protein 13	0.829056	0.957524	1.01165	0.970867		0.354106	0.981825	2.62087	1.26906e-12
VWDE	von Willebrand factor D and EGF domains	0.291386	0.215361	0.846883	0.481819		0.0666897	0.220666	2.617	4.10653e-06
PCAT18	prostate cancer associated transcript 18 (non-protein coding)	0.157282	0.308499	1.14168	0.999893		0.0585134	0.207687	2.61406	5.18051e-05
TP53I11	tumor protein p53 inducible protein 11	3.84788	10.068	1.94414	8.00067e-07		2.91887	9.12345	2.6129	1.27129e-17
C1orf64	chromosome 1 open reading frame 64	0.340661	0.240145	0.93908	0.999893		0	0.322201	2.61158	9.68671e-05
NKD1	naked cuticle homolog 1	1.95298	4.68062	1.50958	0.0477502		0.898639	3.84482	2.60522	1.64816e-05
BCL9	B-cell CLL/lymphoma 9	2.15847	4.11333	1.55389	0.00152155		1.3766	4.1672	2.60376	6.30458e-28
LRRC36	leucine rich repeat containing 36	0.270146	0.417081	1.18125	0.486136		0.112752	0.475555	2.59781	2.01289e-06
KANK4	KN motif and ankyrin repeat domains 4	0.236859	0.209102	0.950324	0.839616		0.047277	0.25784	2.58777	4.10097e-05
KAAG1	kidney associated antigen 1	0.200515	0.352099	1.1384	0.999893		0.025465	0.280162	2.58758	0.000130838
HPN	hepsin	0.550742	0.624086	1.05601	0.845235		0.235358	0.681542	2.58096	6.88005e-06
FAM155A-IT1	FAM155A intronic transcript 1	0.208358	0.359108	1.17811	0.495207		0.0949513	0.583975	2.5718	0.000103596
CASC2	cancer susceptibility candidate 2 (non-protein coding)	0.161439	0.305952	1.31369	0.190449		0.0963841	0.312082	2.56009	8.36358e-08
PVRL4	#N/A	0.728083	2.28867	1.6255	0.0146237		0.413706	1.84172	2.5593	6.38489e-05
CHI3L1	chitinase 3 like 1	0.140779	0.44991	1.70576	0.00642342		0.0637324	0.531998	2.55853	0.000102306
NEBL	nebulette	0.954739	2.00975	1.4555	0.0611186		0.455591	1.61429	2.55292	6.53149e-06
PAK7	#N/A	0.0769597	0.0766931	0.96833	0.999893		0.02524	0.126597	2.54966	0.000146802
PROM2	prominin 2	5.64288	10.5941	1.45855	0.0182627		3.76539	9.89649	2.54303	2.23941e-10
KCNH8	potassium voltage-gated channel subfamily H member 8	0.702003	1.08518	1.19052	0.424503		0.376318	1.05952	2.54139	1.76697e-09
EXPH5	exophilin 5	2.15877	4.53537	1.50178	0.0175242		1.55158	4.47493	2.53954	2.00758e-16
TMEM163	transmembrane protein 163	0.737356	1.58205	1.38588	0.129508		0.472641	1.75451	2.53933	4.04184e-07
CRNDE	colorectal neoplasia differentially expressed (non-protein coding)	0.334887	1.07776	1.54878	0.0317381		0.0658567	0.502486	2.53165	0.00013717
OR51E1	olfactory receptor family 51 subfamily E member 1	0.420914	1.22467	1.59778	0.0116397		0.356057	1.20546	2.53091	9.54561e-06
C2CD4B	C2 calcium dependent domain containing 4B	2.7223	5.38304	1.43331	0.0808527		1.65451	5.89075	2.52877	5.06262e-08
PLAC4	placenta specific 4	1.05996	1.58832	1.09686	0.725602		0.564265	2.23674	2.52622	1.17697e-05
PLEKHB1	pleckstrin homology domain containing B1	3.6543	7.20375	1.517	0.0170566		2.75571	7.75162	2.51961	1.86863e-15
MSI1	musashi RNA binding protein 1	1.99125	4.26327	1.73225	3.06291e-05		1.2545	3.43906	2.51532	2.70203e-12
SEZ6L2	seizure related 6 homolog like 2	6.178	10.5673	1.38787	0.0841916		3.79183	10.235	2.51217	1.01925e-11
BPIFB1	BPI fold containing family B member 1	3.35141	57.9711	1.17819	0.257367		0.109855	69.4492	2.50593	0.000138015
CWH43	cell wall biogenesis 43 C-terminal homolog	0.312158	0.0752093	0.632878	0.999893		0.12366	0.32067	2.50518	0.00018003
AXIN2	axin 2	10.7407	28.2844	1.55945	0.0294073		5.65306	20.3366	2.50293	1.9872e-05
GABRA1	gamma-aminobutyric acid type A receptor alpha1 subunit	0.381544	0.370335	0.882314	0.587666		0.123036	0.302476	2.50246	3.77296e-05
IZUMO1	izumo sperm-egg fusion 1	0.23286	0.185511	0.955551	0.999893		0.100444	0.35858	2.49901	0.000216397
FABP6	fatty acid binding protein 6	0.21039	3.18695	1.28139	0.123952		0.255275	1.11267	2.49806	0.000145267
ARHGEF28	Rho guanine nucleotide exchange factor 28	5.80631	8.9175	1.21275	0.343906		3.32606	8.188	2.49758	4.39515e-14
MSX2	msh homeobox 2	2.13279	5.66081	1.50016	0.0443308		0.734485	8.40418	2.49603	0.000240569
KCNMB2	potassium calcium-activated channel subfamily M regulatory beta subunit 2	0.665255	0.710457	0.938089	0.78064		0.280097	0.845096	2.48433	1.47717e-07
SPDEF	SAM pointed domain containing ETS transcription factor	10.1418	10.7429	1.01887	0.950223		3.92891	11.3043	2.48282	2.32233e-11
GPR56	#N/A	5.33551	10.0409	1.49383	0.0193104		3.77928	10.4927	2.48279	5.78512e-13
PRKACA	protein kinase cAMP-activated catalytic subunit alpha	6.58484	13.2345	1.84305	6.89999e-11		5.10387	13.913	2.477	2.47356e-30
LINGO1	leucine rich repeat and Ig domain containing 1	0.304845	0.29816	0.956796	0.871665		0.0748755	0.288074	2.47239	7.37501e-05
ODAM	odontogenic, ameloblast asssociated	2.63272	9.12351	1.4377	0.0659264		1.46914	15.9104	2.47148	0.000275877
EPHB3	EPH receptor B3	4.78489	12.4759	1.60176	0.0140393		3.44376	8.48279	2.46995	1.30674e-12
PCDHGA10	protocadherin gamma subfamily A, 10	2.0986	3.90242	1.51138	0.00589997		1.47428	4.37069	2.46956	1.3785e-29
ADRA2A	adrenoceptor alpha 2A	6.58204	15.8826	1.63381	0.00436069		4.93835	14.4658	2.45846	3.09756e-13
PCDHGA3	protocadherin gamma subfamily A, 3	1.4363	2.75856	1.52797	0.0105114		1.03004	3.13677	2.45429	1.45765e-32
RHBDL2	rhomboid like 2	0.658584	2.44457	1.43637	0.084961		0.526079	1.92709	2.45212	2.77897e-05
DLGAP1	DLG associated protein 1	0.0690778	0.0518263	0.872688	0.999893		0.0199336	0.0950418	2.45196	0.000162591
GYLTL1B	#N/A	1.24183	1.79324	1.17316	0.504968		0.552445	1.59933	2.44982	1.69982e-09
PCDHGA1	protocadherin gamma subfamily A, 1	1.42576	2.78648	1.55534	0.00606355		1.02627	3.12417	2.44982	1.03305e-33
PCDHGA5	protocadherin gamma subfamily A, 5	1.50952	2.8886	1.53817	0.00694377		1.09386	3.25783	2.44531	1.04666e-32
STK32B	serine/threonine kinase 32B	0.517435	0.548347	0.955327	0.870275		0.219219	0.70178	2.44322	3.50025e-06
KY	kyphoscoliosis peptidase	0.337792	0.630201	1.39851	0.111179		0.185943	0.586088	2.44308	7.62342e-08
PCDHGC4	protocadherin gamma subfamily C, 4	1.45088	2.76216	1.51974	0.011059		1.02918	3.14464	2.4416	1.03305e-33
SLC1A2	solute carrier family 1 member 2	0.196805	0.221772	0.983469	0.954868		0.0538568	0.246907	2.44046	1.13711e-06
C9orf50	chromosome 9 open reading frame 50	0.117485	0.2571	1.22969	0.999893		0.03151	0.185859	2.43616	0.000368915
CADPS	calcium dependent secretion activator	5.45348	10.9107	1.55457	0.0121129		2.16864	8.18994	2.4342	1.902e-05
NKX6-2	NK6 homeobox 2	0.209227	0.12468	0.885269	0.999893		0.0141134	0.381692	2.43156	0.000366658
CHAMP1	chromosome alignment maintaining phosphoprotein 1	2.78557	5.62956	1.65194	3.51524e-05		2.01705	5.39215	2.43112	1.97073e-20
PRNCR1	prostate cancer associated non-coding RNA 1	0.151437	0.20443	1.06552	0.800994		0.0924896	0.264147	2.43052	5.96815e-08
PCDHGC5	protocadherin gamma subfamily C, 5	1.42701	2.74937	1.53998	0.00787865		1.00911	3.08522	2.42943	1.03305e-33
SLC7A2	solute carrier family 7 member 2	2.06738	3.30634	1.33851	0.10706		1.29814	3.69252	2.42939	2.12264e-10
CEMIP	cell migration inducing hyaluronan binding protein	0.830266	8.13874	1.6612	0.00567478		1.0735	6.81894	2.42847	0.000350126
KCNC4	potassium voltage-gated channel subfamily C member 4	0.930999	1.90652	1.40237	0.106031		0.493597	1.65661	2.42788	3.11732e-08
ZMIZ1-AS1	ZMIZ1 antisense RNA 1	0.537311	0.657701	1.14449	0.543105		0.272268	0.990975	2.42188	3.85561e-05
ZNF185	zinc finger protein 185 (LIM domain)	1.09284	4.30558	1.94338	0.000177572		0.885323	3.76483	2.42046	3.38953e-05
OXGR1	oxoglutarate receptor 1	0.17708	0.497116	1.42752	0.0929916		0.086009	0.356725	2.42024	6.99559e-05
B4GALNT3	beta-1,4-N-acetyl-galactosaminyltransferase 3	1.33027	4.08141	1.62992	0.0138433		1.14169	4.29924	2.41916	0.000159404
MLPH	melanophilin	7.58948	16.7617	1.35553	0.155805		4.58863	12.603	2.41869	3.50534e-12
ACMSD	aminocarboxymuconate semialdehyde decarboxylase	1.20735	0.909277	0.946164	0.842894		0.505825	1.99548	2.41846	8.11041e-05
MGC45800	#N/A	1.29048	1.5545	1.12531	0.545987		0.669372	1.29644	2.413	6.44829e-06
EPN3	epsin 3	2.54734	4.8244	1.53627	0.00241392		1.73056	4.95708	2.4123	4.44194e-13
TACSTD2	tumor-associated calcium signal transducer 2	0.962626	11.4233	1.59292	0.011059		1.27506	8.14725	2.40682	0.000427039
C6orf58	chromosome 6 open reading frame 58	449.014	482.502	1.00581	0.979775		11.2668	420.028	2.40123	0.000282746
PCDHGA2	protocadherin gamma subfamily A, 2	1.41817	2.65094	1.50055	0.0134221		1.02114	3.02712	2.40032	7.43786e-31
DLGAP1-AS5	DLGAP1 antisense RNA 5	0.183055	0.0867741	0.786138	0.999893		0.0287269	0.152344	2.39718	0.000395477
IL1R2	interleukin 1 receptor type 2	0.398812	2.07536	1.52555	0.0364774		0.239299	1.01396	2.39582	2.31934e-05
APOLD1	apolipoprotein L domain containing 1	3.23937	8.58195	1.76608	0.000167205		2.79012	7.81682	2.39183	1.06009e-08
GRIN2D	glutamate ionotropic receptor NMDA type subunit 2D	0.376476	1.64437	1.86359	0.000950325		0.242543	1.20432	2.39168	0.000156152
ATP4B	ATPase H+/K+ transporting beta subunit	0.85841	0.316378	0.813408	0.999893		0.0828345	0.394943	2.389	0.000408842
CHST4	carbohydrate sulfotransferase 4	0.0939655	0.559022	1.38545	0.0912497		0.0557154	0.300479	2.38796	0.000429903
PCDHGA4	protocadherin gamma subfamily A, 4	1.45062	2.73614	1.5137	0.0108349		1.04209	3.08034	2.38748	2.78875e-32
KIAA1549	KIAA1549	0.959331	1.66766	1.32707	0.127182		0.554515	1.51785	2.38339	4.31888e-09
PAX9	paired box 9	0.0257237	0.139888	1.43448	0.999893		0.0222362	0.13981	2.38143	0.000524997
PDZK1IP1	PDZK1 interacting protein 1	10.3846	21.9537	1.48577	0.0522754		5.56251	23.7358	2.37553	0.000325904
BACE2	beta-site APP-cleaving enzyme 2	6.38302	12.2921	1.4098	0.0751168		4.61259	12.8652	2.37326	1.44104e-10
PITPNM3	PITPNM family member 3	0.487904	2.11119	1.93152	0.000327074		0.483108	1.67559	2.37221	2.88416e-05
SPOCK1	sparc/osteonectin, cwcv and kazal-like domains proteoglycan (testican) 1	0.101875	0.204318	1.35404	0.162393		0.0460339	0.143555	2.37134	0.000252373
PCDHGB1	protocadherin gamma subfamily B, 1	1.49436	2.82077	1.50829	0.0119127		1.09192	3.19654	2.36885	1.03305e-33
GABRP	gamma-aminobutyric acid type A receptor pi subunit	5.28809	13.15	1.6151	0.004776		3.82395	12.4562	2.36771	8.91352e-06
ATF7	activating transcription factor 7	3.01394	5.50027	1.36218	0.0608506		1.88833	5.47906	2.36461	1.86661e-18
KIAA1324	KIAA1324	31.954	55.635	1.4551	0.0149345		21.5447	55.941	2.36273	1.59824e-13
PLEKHG4B	pleckstrin homology and RhoGEF domain containing G4B	0.0706702	0.088236	1.01777	0.953278		0.027716	0.093608	2.36246	8.97415e-05
PCDHGA12	protocadherin gamma subfamily A, 12	1.54731	2.89927	1.5117	0.0106613		1.11973	3.28284	2.3604	1.45337e-31
SCG5	secretogranin V	24.9821	25.8452	0.945919	0.834055		9.1646	23.7195	2.35983	1.84776e-08
TENM2	teneurin transmembrane protein 2	0.891489	1.31243	1.17174	0.434238		0.587226	1.62184	2.35786	3.53147e-07
MUC7	mucin 7, secreted	0.0177185	0.103967	1.40391	0.999893		0.0145287	0.09311	2.35754	0.000593428
DBNDD1	dysbindin (dystrobrevin binding protein 1) domain containing 1	0.89945	2.2819	1.65599	0.00358512		0.289844	0.792612	2.356	1.64223e-07
LRRN1	leucine rich repeat neuronal 1	1.37691	2.0975	1.25045	0.228487		0.918317	2.67506	2.34878	3.8312e-09
STMND1	stathmin domain containing 1	0.322374	0.331113	0.994453	0.999893		0.0511878	0.414839	2.34658	0.000659048
MT1DP	metallothionein 1D, pseudogene	1.06711	2.88796	1.38545	0.132501		0.765989	2.40904	2.34105	1.15614e-05
PCDHGA7	protocadherin gamma subfamily A, 7	1.44417	2.66766	1.49503	0.0112327		1.04291	3.00417	2.33414	1.16984e-28
PCDHGA8	protocadherin gamma subfamily A, 8	1.25704	2.37983	1.51221	0.011036		0.927102	2.67874	2.3333	1.43772e-28
ZMIZ1	zinc finger MIZ-type containing 1	8.16437	12.1767	1.3033	0.0473323		5.30707	14.621	2.32979	6.12526e-20
CASC16	cancer susceptibility candidate 16 (non-protein coding)	0.192117	0.304119	1.16853	0.999893		0.147145	0.533011	2.325	0.000307093
TDGF1	teratocarcinoma-derived growth factor 1	0.387477	0.894266	1.42902	0.0941503		0.118073	0.493449	2.32443	0.000177876
LGR6	leucine rich repeat containing G protein-coupled receptor 6	0.422896	2.3306	1.98345	0.000187812		0.269267	1.66147	2.32254	0.000750448
CDH3	cadherin 3	0.287971	4.07352	1.8033	0.000951514		0.266615	3.38088	2.3178	0.000761833
RFX6	regulatory factor X6	2.36342	3.64004	1.20535	0.314957		1.4129	3.34846	2.31324	6.20367e-12
CEACAM6	carcinoembryonic antigen related cell adhesion molecule 6	73.5281	260.448	1.54718	0.0322843		77.8165	253.599	2.31289	5.64761e-06
PCDHGB5	protocadherin gamma subfamily B, 5	1.78823	3.35499	1.50423	0.0139881		1.24366	3.51961	2.31264	6.79737e-32
USP54	ubiquitin specific peptidase 54	6.00551	12.3847	1.46744	0.0191119		4.3359	11.2371	2.31179	1.1e-12
PCDHGA11	protocadherin gamma subfamily A, 11	1.62901	2.78451	1.40679	0.0387833		1.08742	3.10434	2.3113	2.78875e-32
PHKA1	phosphorylase kinase regulatory subunit alpha 1	0.760448	1.97388	1.60887	0.00954997		0.568598	1.46121	2.31038	1.65222e-08
ADORA2B	adenosine A2b receptor	0.443995	2.15906	1.7616	0.00356057		0.468345	1.2946	2.30826	8.66016e-05
PPP1R1B	protein phosphatase 1 regulatory inhibitor subunit 1B	45.3921	97.9044	1.65972	0.000167205		35.6592	85.3826	2.30664	3.06769e-16
KLK10	kallikrein related peptidase 10	0.0465592	1.44407	1.38945	0.0441128		0.117757	1.64887	2.30182	0.000874926
EFHC2	EF-hand domain containing 2	0.568557	1.16785	1.33631	0.159864		0.377378	1.21591	2.30145	5.80676e-06
LINC00261	long intergenic non-protein coding RNA 261	11.448	17.3367	1.16905	0.504179		4.69013	12.4794	2.29965	2.87645e-10
NOTUM	NOTUM, palmitoleoyl-protein carboxylesterase	1.97958	3.85517	1.30701	0.222055		0.739995	3.77719	2.29884	0.000902529
DCX	doublecortin	0.129051	0.209899	1.29023	0.181945		0.0531441	0.162511	2.29791	5.81031e-05
STRIP2	striatin interacting protein 2	0.33148	0.99193	1.43288	0.0912179		0.280391	1.00494	2.29457	8.59005e-06
GJB4	gap junction protein beta 4	0.0500538	0.445674	1.53245	0.0216273		0.0299252	0.234863	2.29312	0.000977744
CCDC60	coiled-coil domain containing 60	0.309008	0.223491	0.930334	0.738682		0.0206019	0.158706	2.28967	0.000962097
SLC12A2	solute carrier family 12 member 2	77.7199	165.926	1.67518	0.00124753		51.7286	143.309	2.28876	1.72561e-05
PCDHGB3	protocadherin gamma subfamily B, 3	1.64812	2.93063	1.45587	0.0192131		1.19639	3.3372	2.28731	1.43775e-27
RAI2	retinoic acid induced 2	2.56011	3.72177	1.1875	0.385573		1.47643	4.03431	2.28677	5.36197e-10
CHST9	carbohydrate sulfotransferase 9	0.42229	0.561692	1.13354	0.585797		0.317836	0.702445	2.28239	1.41157e-05
PROM1	prominin 1	16.6326	24.7262	1.24081	0.294847		8.83756	21.6054	2.27873	2.12391e-13
PCDHGA6	protocadherin gamma subfamily A, 6	1.55862	2.9137	1.51906	0.00898204		1.17602	3.32308	2.2768	3.53703e-32
TRIM58	tripartite motif containing 58	0.0720603	0.103397	1.08981	0.742231		0.0336312	0.0953565	2.26889	0.000628444
PCDHGB4	protocadherin gamma subfamily B, 4	1.61357	2.96939	1.49576	0.0111477		1.21281	3.37233	2.2655	6.90935e-26
SIM2	single-minded family bHLH transcription factor 2	0.30755	1.64618	1.48524	0.0477502		0.271928	0.916142	2.26485	0.00014276
BHLHE41	basic helix-loop-helix family member e41	2.03808	5.14811	1.45285	0.0697285		1.39666	4.4612	2.26251	7.38406e-09
DMTN	dematin actin binding protein	1.8389	3.95667	1.55219	0.0117584		1.4075	3.49722	2.25623	1.26569e-12
GPR115	#N/A	0.0550831	0.23155	1.3575	0.115185		0.0160123	0.135553	2.25582	0.00115694
TTC40	#N/A	0.249444	0.424421	1.2864	0.26629		0.0823939	0.292084	2.25444	0.000374986
SP2	Sp2 transcription factor	1.53854	2.40965	1.31056	0.130403		0.983423	2.65343	2.25408	3.371e-17
IKZF4	IKAROS family zinc finger 4	0.355295	0.66089	1.29324	0.16759		0.241297	0.64405	2.25168	5.22859e-09
LRRC17	leucine rich repeat containing 17	1.51708	1.59338	0.941549	0.827362		0.706874	2.10461	2.25096	1.69621e-06
GAST	gastrin	90.6717	214.731	1.47141	0.0306462		26.7233	100.319	2.24553	0.00132439
ZFP36L1	ZFP36 ring finger protein-like 1	26.6881	43.0259	1.29504	0.12631		17.24	42.9918	2.24384	2.58212e-18
HCN1	hyperpolarization activated cyclic nucleotide gated potassium channel 1	0.0424368	0.0857694	1.20836	0.398669		0.0232131	0.162374	2.24348	0.00125889
PCDHGB2	protocadherin gamma subfamily B, 2	1.66909	3.00991	1.46602	0.0172831		1.22192	3.37262	2.24176	1.84532e-28
LIPM	lipase family member M	0.224462	0.728947	1.41647	0.093667		0.132068	0.455043	2.24061	0.00040572
SLC41A1	solute carrier family 41 member 1	1.5643	2.73318	1.4559	0.0284635		0.955879	2.63726	2.2384	1.62351e-11
PCDHGA9	protocadherin gamma subfamily A, 9	1.68704	3.07102	1.46587	0.019388		1.23264	3.40107	2.23518	1.10054e-28
RFX7	regulatory factor X7	5.38955	8.48536	1.34105	0.0168753		3.39257	9.01034	2.23305	2.04607e-16
LINC01021	long intergenic non-protein coding RNA 1021	0.00826916	1.15405	1.24433	0.133391		0	0.334803	2.23258	0.00081964
CD44	CD44 molecule (Indian blood group)	21.2904	45.7821	1.44947	0.0503988		13.7487	38.0033	2.23194	2.48153e-10
CNTN3	contactin 3	0.935253	0.569021	0.777985	0.264858		0.402707	0.890552	2.23096	1.84334e-06
HCN4	hyperpolarization activated cyclic nucleotide gated potassium channel 4	0.446759	0.35283	0.84371	0.445995		0.263865	0.501292	2.22981	3.76924e-08
ZNRF3-AS1	ZNRF3 antisense RNA 1	0.271811	0.467977	1.20313	0.430643		0.124175	0.478406	2.22978	0.000486429
PCDHGB6	protocadherin gamma subfamily B, 6	1.74493	3.12874	1.46385	0.0164454		1.24683	3.54338	2.2292	1.02964e-24
LY6D	lymphocyte antigen 6 complex, locus D	0	0.0968538	1.16486	0.999893		0.00746287	0.339958	2.22873	0.000858507
FXYD3	FXYD domain containing ion transport regulator 3	20.3703	37.4696	1.49452	0.0106402		18.5471	37.4555	2.22725	2.06195e-09
SCG3	secretogranin III	1.60497	2.45921	1.13938	0.440906		0.809196	2.27225	2.22683	2.04142e-06
LGR5	leucine rich repeat containing G protein-coupled receptor 5	3.10467	9.01316	1.89093	0.000155635		2.43122	6.90613	2.22294	3.68246e-05
DNAH12	dynein axonemal heavy chain 12	0.0731083	0.136992	1.32886	0.163624		0.0406203	0.113232	2.22229	0.000274934
SHANK2-AS3	SHANK2 antisense RNA 3	0.102632	0.223411	1.25264	0.999893		0.0464176	0.280496	2.22136	0.00107913
ANO1	anoctamin 1	0.82093	2.69106	1.50712	0.0486607		0.532311	1.71188	2.21709	5.46076e-06
PTPRZ1	protein tyrosine phosphatase, receptor type Z1	0.537622	0.620662	0.920571	0.759802		0.167429	0.524966	2.2134	4.68564e-06
IRX2	iroquois homeobox 2	0.0490786	0.290925	1.61295	0.0141915		0.0836985	0.411419	2.21161	0.00142508
TMEM178B	transmembrane protein 178B	0.155772	0.188425	0.968255	0.908997		0.0631744	0.33629	2.20868	0.00141804
OLFM4	olfactomedin 4	728.132	1647.58	1.70339	0.0010806		684.2	1933.76	2.20171	4.03567e-05
SLC5A5	solute carrier family 5 member 5	0.039712	0.0403014	1.00905	0.999893		0.0132071	0.144525	2.19694	0.00183833
SERPINB5	serpin family B member 5	23.75	81.8498	1.65045	0.0115399		16.5513	74.6645	2.19619	0.00114164
NR4A2	nuclear receptor subfamily 4 group A member 2	0.986861	2.10336	1.27725	0.28163		0.531345	3.18687	2.1927	0.00185115
S100P	S100 calcium binding protein P	7.33553	105.757	1.48395	0.0292949		7.82708	48.8712	2.19266	0.00172693
MSLN	mesothelin	2.82154	8.76006	1.57772	0.0231355		2.09949	9.95165	2.19148	0.000171592
RABL2B	RAB, member of RAS oncogene family-like 2B	0.824509	1.92728	2.08225	1.77111e-10		0.625016	1.63063	2.18976	5.16405e-11
UCP2	uncoupling protein 2	7.38647	11.5639	1.31364	0.0842799		5.32837	13.5537	2.18765	3.00928e-11
RARG	retinoic acid receptor gamma	1.33559	3.48283	1.54427	0.0322843		1.05422	2.82396	2.18762	1.48513e-07
ARX	aristaless related homeobox	0.416942	0.630825	1.26443	0.263182		0.23767	0.670989	2.18588	0.000267988
MARCKSL1	MARCKS like 1	26.101	62.1975	1.69288	0.00145946		20.0279	49.139	2.18385	6.96905e-11
FAM222B	family with sequence similarity 222 member B	3.00378	5.74705	1.56608	0.00163829		2.17364	5.76294	2.18312	1.55379e-23
RAB3B	RAB3B, member RAS oncogene family	0.784704	1.31676	1.13823	0.461638		0.514425	1.1917	2.18165	2.29266e-08
NAV1	neuron navigator 1	2.22489	3.82298	1.38046	0.0122825		1.42661	3.98268	2.17895	1.14283e-15
SHISA6	shisa family member 6	0.107376	0.0650231	0.85511	0.471615		0.0240899	0.120099	2.17782	0.00139409
SH3BP4	SH3 domain binding protein 4	13.1418	25.8032	1.5699	0.000485981		9.71583	25.6859	2.17782	7.10307e-15
GPT2	glutamic pyruvate transaminase (alanine aminotransferase) 2	1.94383	3.89464	1.42549	0.0761766		1.09094	2.905	2.17661	2.34346e-07
SRCIN1	SRC kinase signaling inhibitor 1	0.14622	0.187209	1.09685	0.69665		0.0980319	0.232938	2.17573	1.42049e-05
PCDHGB8P	protocadherin gamma subfamily B, 8 pseudogene	0.562021	0.639734	0.976101	0.927003		0.220206	0.739198	2.17566	0.000223213
TFAP2A	transcription factor AP-2 alpha	0.10359	0.494774	1.74786	0.00391065		0.0499901	0.251883	2.17544	0.00136081
ARHGAP8	Rho GTPase activating protein 8	4.04689	9.14618	1.55284	0.0187905		3.59128	8.56046	2.17335	4.37831e-06
HOTAIR	HOX transcript antisense RNA	0.00604365	0.0676951	1.18654	0.999893		0.00845139	0.195164	2.17042	0.00184892
PCAT1	prostate cancer associated transcript 1 (non-protein coding)	0.170537	0.269838	1.22092	0.392787		0.118355	0.358744	2.16412	0.00104743
EPB41L1	erythrocyte membrane protein band 4.1 like 1	3.28107	7.27752	1.5005	0.0271682		2.23953	6.19256	2.16345	5.02367e-11
ABCA13	ATP binding cassette subfamily A member 13	0.460576	0.779099	1.39772	0.0677332		0.237626	0.708882	2.1589	1.03571e-05
MUC6	mucin 6, oligomeric mucus/gel-forming	141.349	136.69	0.994134	0.980545		8.04549	233.107	2.15819	0.00129773
ALDH3B2	aldehyde dehydrogenase 3 family member B2	0.113742	0.10242	0.969636	0.999893		0.00445163	0.151881	2.15782	0.00183274
CCL11	C-C motif chemokine ligand 11	11.9974	22.2742	1.13149	0.603392		8.3349	22.2756	2.15198	3.34313e-13
TTC39A	tetratricopeptide repeat domain 39A	5.2432	10.2787	1.44764	0.0410667		4.32008	10.118	2.15053	1.81529e-12
KIAA1549L	KIAA1549-like	0.0500098	0.435378	1.50403	0.0264237		0.035214	0.132684	2.1491	0.00104483
LOC284454	#N/A	2.53793	6.77751	1.22701	0.358171		1.61109	9.61104	2.14755	0.00250336
PPY	pancreatic polypeptide	0.79278	1.79703	1.24616	0.307503		0.0758029	1.40304	2.14517	0.00179427
PVT1	Pvt1 oncogene (non-protein coding)	1.08073	2.43303	1.39277	0.115301		0.757207	1.87445	2.14359	1.56341e-05
B3GAT1	beta-1,3-glucuronyltransferase 1	0.323833	0.484656	1.09479	0.731508		0.106613	0.355123	2.14241	3.08956e-05
NKX2-2	NK2 homeobox 2	1.03875	1.72144	1.33758	0.143948		0.660431	1.56632	2.14171	8.27922e-07
CCDC113	coiled-coil domain containing 113	0.42735	0.787573	1.25203	0.322593		0.302267	0.771452	2.1411	3.87661e-05
SAMD4B	sterile alpha motif domain containing 4B	5.01281	8.28804	1.4396	0.00518674		3.55372	8.65134	2.13721	9.96627e-28
EFR3B	EFR3 homolog B	0.439706	0.511108	0.929896	0.76414		0.26018	0.646334	2.13557	2.38907e-05
ONECUT3	one cut homeobox 3	0.299619	0.753644	1.26606	0.26917		0.188091	0.608388	2.13499	0.00179294
TRIM29	tripartite motif containing 29	0.153375	1.17098	1.83149	0.00109763		0.224226	0.998975	2.13345	0.00281435
MADCAM1	mucosal vascular addressin cell adhesion molecule 1	0.446585	1.36338	1.93537	9.79587e-05		0.31328	1.12984	2.13309	5.71157e-05
OPCML	opioid binding protein/cell adhesion molecule-like	0.0197835	0.0478789	1.20537	0.999893		0.0033674	0.0432131	2.13239	0.00280676
TANC2	tetratricopeptide repeat, ankyrin repeat and coiled-coil containing 2	1.24183	2.01335	1.20518	0.379996		0.788874	2.04546	2.13236	7.76588e-08
ASCL2	achaete-scute family bHLH transcription factor 2	10.4464	20.1025	1.54302	0.0202789		6.98148	19.1628	2.13212	0.000463943
NRSN2	neurensin 2	1.17232	2.11266	1.54171	0.00808081		0.862632	2.08917	2.13039	5.15805e-10
MT1G	metallothionein 1G	94.1596	205.145	1.54335	0.00788067		135.168	267.82	2.13015	1.46488e-13
DUOX2	dual oxidase 2	5.60386	5.72259	1.03278	0.885397		0.208139	6.85117	2.13003	0.00178593
FAM83H-AS1	FAM83H antisense RNA 1 (head to head)	0.915046	2.46028	1.5235	0.0380115		0.710578	1.95429	2.12948	1.98734e-05
SEC14L5	SEC14 like lipid binding 5	0.277432	0.279408	0.964484	0.897052		0.161849	0.371285	2.12943	5.42217e-05
GJB3	gap junction protein beta 3	0.280217	4.7452	1.77133	0.00133396		0.464549	2.89498	2.12628	0.00293861
RNF183	ring finger protein 183	0.398832	0.665642	1.20274	0.425035		0.239553	0.69841	2.12437	0.00129202
IGFL2	IGF like family member 2	0.037086	0.414658	1.24572	0.999893		0.00626724	0.224742	2.12135	0.00203593
LOC92249	#N/A	0.943973	1.61201	1.32424	0.1186		0.639745	1.48226	2.11748	6.00567e-09
RGS7	regulator of G-protein signaling 7	0.279896	0.522018	1.36666	0.131742		0.148063	0.414675	2.11603	0.000404991
SLC26A7	solute carrier family 26 member 7	0.733797	0.684015	0.905078	0.666286		0.337927	0.879547	2.11306	0.000160786
DGKB	diacylglycerol kinase beta	0.0514905	0.0918641	1.15455	0.551082		0.0151599	0.0628815	2.11284	0.00320616
CNDP1	carnosine dipeptidase 1	7.22038	13.6123	1.45116	0.00177392		5.01864	13.5693	2.11072	1.30605e-06
GKN1	gastrokine 1	0.623879	2.97873	1.11132	0.463351		0.145851	29.5623	2.10997	0.00163505
FXYD5	FXYD domain containing ion transport regulator 5	6.9253	15.9003	1.648	0.00253554		4.92976	12.4682	2.1097	1.60291e-15
SPATA18	spermatogenesis associated 18	2.10006	4.33936	1.40032	0.0848275		1.44592	3.58337	2.10845	4.81943e-07
PCDHGB7	protocadherin gamma subfamily B, 7	1.92253	3.11515	1.35893	0.0621918		1.339	3.49514	2.1059	1.86552e-27
RIMBP2	RIMS binding protein 2	1.66735	2.15417	1.06974	0.702818		0.854101	2.0618	2.1046	5.70984e-08
PADI2	peptidyl arginine deiminase 2	1.27364	2.3884	1.37965	0.0883935		0.788271	2.16555	2.10453	3.29856e-10
FOXP4	forkhead box P4	2.89127	4.6639	1.35152	0.0687048		2.01625	4.90308	2.10249	5.58269e-15
KIAA1683	KIAA1683	0.484258	0.775615	1.29208	0.170018		0.402696	1.05462	2.10222	5.38834e-07
CACNG4	calcium voltage-gated channel auxiliary subunit gamma 4	0.121288	0.197613	1.19577	0.448685		0.0826666	0.215779	2.10194	0.00216184
LRRC8E	leucine rich repeat containing 8 family member E	0.707093	1.42361	1.42371	0.0710731		0.520807	1.25704	2.1003	2.16198e-07
SLC9A1	solute carrier family 9 member A1	6.49476	10.2701	1.39921	0.0265076		4.85977	12.3551	2.10008	3.34313e-13
CPB1	carboxypeptidase B1	0.284725	1.02593	1.49121	0.0515112		0.145762	6.47887	2.09964	0.00209353
TFF2	trefoil factor 2	659.372	764.551	1.01511	0.934424		19.051	937.245	2.09909	0.00179921
LCN2	lipocalin 2	14.3912	24.6462	1.21595	0.386245		6.69792	39.5458	2.09723	0.00358804
CAPN8	calpain 8	4.16534	12.2032	1.37053	0.142292		3.26517	10.732	2.09639	0.000748832
HOXD-AS1	#N/A	0.255335	0.554815	1.42735	0.0860008		0.168292	0.509667	2.09543	3.26204e-05
LSAMP	limbic system-associated membrane protein	0.475978	0.849389	1.28675	0.257764		0.267556	0.750795	2.09304	5.16944e-07
ARID1A	AT-rich interaction domain 1A	10.1792	14.4949	1.25839	0.0734896		6.76871	16.3871	2.09254	3.13765e-23
TMEM27	transmembrane protein 27	1.18322	1.08386	0.920545	0.758458		0.519263	1.45169	2.09131	0.000434658
AC007740.1	0	0.129087	0.0741221	0.78531	0.999893		0.0416977	0.144392	2.09089	0.00307905
EGR1	early growth response 1	2.99626	4.6063	1.12319	0.639823		1.48086	12.7901	2.0857	0.00365039
LRG1	leucine rich alpha-2-glycoprotein 1	5.61374	6.35165	1.03569	0.851099		3.35837	7.74513	2.08539	2.56261e-06
SLC29A3	solute carrier family 29 member 3	1.65025	3.56373	1.71835	1.34319e-05		1.29286	3.75278	2.08222	3.50627e-08
EGR3	early growth response 3	0.221309	0.444783	1.20298	0.420651		0.102981	0.849114	2.08159	0.00396998
KRT7	keratin 7	0.600902	8.66074	1.87495	0.000395719		0.748833	7.62997	2.08148	0.00345923
PATL1	PAT1 homolog 1, processing body mRNA decay factor	7.63566	14.7438	1.57886	0.000271808		6.18425	14.5821	2.07938	6.4357e-27
CALB1	calbindin 1	0.654213	0.618094	0.9249	0.756587		0.295241	0.700126	2.07721	0.000114603
CD300LD	CD300 molecule like family member d	0.0536475	0.429939	1.27798	0.999893		0.0225445	0.390971	2.07463	0.00256873
CYP2B6	cytochrome P450 family 2 subfamily B member 6	2.54218	5.99138	1.55307	0.00833704		1.91637	6.54892	2.07375	1.07135e-07
FIRRE	firre intergenic repeating RNA element	0.392186	0.749392	1.19924	0.999893		0.200929	0.472674	2.06998	0.000348253
POGZ	pogo transposable element with ZNF domain	8.22718	12.8191	1.38202	0.000255586		5.69672	12.8737	2.06905	1.6081e-17
PART1	prostate androgen-regulated transcript 1 (non-protein coding)	0.206336	0.270298	1.10587	0.68714		0.112148	0.297749	2.0687	6.49836e-07
LYPD5	LY6/PLAUR domain containing 5	0.225485	0.363669	1.23377	0.360551		0.147054	0.377802	2.06472	0.000450158
CACHD1	cache domain containing 1	2.57852	3.60763	1.16753	0.386619		1.74395	4.01581	2.06387	1.49786e-19
GSC	goosecoid homeobox	0.358262	0.166792	0.770119	0.999893		0.160891	0.410277	2.06185	0.00423032
SLC4A11	solute carrier family 4 member 11	0.155908	0.368756	1.29247	0.243937		0.0902727	0.305367	2.05631	0.00202598
ZYX	zyxin	13.4231	27.0088	1.57111	0.00868456		10.9195	26.3482	2.05596	1.9053e-13
ROS1	ROS proto-oncogene 1, receptor tyrosine kinase	0.0729232	0.0797782	0.995068	0.987111		0.040549	0.124582	2.05341	0.00462579
SEPN1	selenoprotein N, 1	6.89964	12.8425	1.50622	0.0041426		5.32348	12.5446	2.05061	1.10643e-22
NAF1	nuclear assembly factor 1 ribonucleoprotein	1.80078	3.60333	1.70406	2.3495e-05		1.26649	3.15949	2.05015	1.14637e-10
SERPINA3	serpin family A member 3	8.60284	19.2949	1.20082	0.390443		1.20041	22.0402	2.04981	0.00334606
EP300	E1A binding protein p300	13.9874	20.4405	1.30046	0.0163582		9.88007	23.3953	2.04921	3.59117e-24
AQP5	aquaporin 5	13.6502	11.7267	0.977376	0.911377		0.397318	14.2792	2.04911	0.00256762
PCDHGC3	protocadherin gamma subfamily C, 3	2.51684	4.34912	1.44536	0.0237757		1.87755	4.67641	2.04858	3.87454e-19
CNTNAP2	contactin associated protein-like 2	0.556472	1.25211	1.47713	0.0582489		0.361789	0.877913	2.04805	5.41407e-05
KRTAP5-1	keratin associated protein 5-1	0.335715	0.499913	1.17611	0.999893		0.16716	0.573164	2.04731	0.00210448
EFNA5	ephrin A5	0.61704	0.913283	1.28782	0.104923		0.399659	1.18732	2.04658	0.000148463
TMPRSS5	transmembrane protease, serine 5	0.262906	0.479661	1.19393	0.446609		0.15481	0.395622	2.04412	0.00131045
DAG1	dystroglycan 1	10.487	19.1656	1.53341	0.000963065		8.63238	19.9443	2.044	7.40628e-17
AC017060.1	0	0.221519	0.526491	1.20474	0.999893		0.117229	0.690735	2.04254	0.0050376
KIAA2018	#N/A	7.02728	10.6869	1.29992	0.0408323		4.89734	11.578	2.04154	1.11511e-17
VSTM2L	V-set and transmembrane domain containing 2 like	0.998783	1.62337	1.2412	0.339592		0.602994	1.52018	2.04086	0.000649968
ARHGEF38	Rho guanine nucleotide exchange factor 38	3.40468	5.29001	1.24855	0.264662		2.47835	5.53541	2.0406	1.92145e-08
PTPRN2	protein tyrosine phosphatase, receptor type N2	6.28387	6.4441	0.966253	0.89589		3.07477	7.33078	2.03688	1.89504e-09
BAAT	bile acid-CoA:amino acid N-acyltransferase	0.0389638	0.0947755	1.24524	0.999893		0.0259972	0.0935629	2.03582	0.00480427
BMP4	bone morphogenetic protein 4	7.00109	13.4494	1.45419	0.0477502		5.6287	13.2843	2.03504	2.45277e-14
EGR2	early growth response 2	0.560878	0.573267	0.998487	0.996018		0.306638	1.49247	2.03485	0.00500666
CASR	calcium sensing receptor	0.783089	0.865308	0.970951	0.894262		0.399997	0.922114	2.03299	3.74067e-07
SLC38A4	solute carrier family 38 member 4	1.02283	1.70514	1.23305	0.302849		0.440439	1.1997	2.03154	2.10616e-06
HOXA4	homeobox A4	0.676912	1.14609	1.35793	0.137161		0.417078	1.18057	2.03111	1.03728e-05
CXCL2	C-X-C motif chemokine ligand 2	0.489983	1.53044	1.38764	0.121986		0.419964	3.45552	2.03084	0.00531448
SMAGP	small cell adhesion glycoprotein	12.8922	27.1117	1.5955	0.00106122		11.6063	26.536	2.02936	1.56154e-08
GATAD2B	GATA zinc finger domain containing 2B	3.96683	6.13594	1.26542	0.125037		2.59051	6.26881	2.02876	5.12367e-14
BCL9L	B-cell CLL/lymphoma 9-like	3.29099	5.11633	1.38605	0.0194124		2.41925	5.63953	2.02663	1.09191e-19
TCF7	transcription factor 7 (T-cell specific, HMG-box)	4.68547	9.14284	1.61074	0.000811427		3.29428	8.22722	2.02509	1.66897e-14
ERV3-1	endogenous retrovirus group 3 member 1	2.78708	4.624	1.2777	0.160834		1.8963	4.77505	2.02436	1.24741e-12
KRT23	keratin 23	0.332403	0.703891	1.45428	0.0653295		0.383477	0.943469	2.02428	0.000308885
HNF1B	HNF1 homeobox B	4.267	6.41531	1.26433	0.169353		3.04953	6.997	2.02399	5.00456e-11
C17orf97	chromosome 17 open reading frame 97	1.09457	2.1395	1.57173	0.00156936		0.995799	2.40524	2.02159	7.96516e-08
PCLO	piccolo presynaptic cytomatrix protein	1.38933	1.86503	1.09034	0.667805		0.873517	2.21317	2.02148	1.87543e-10
RABL5	#N/A	1.78484	2.79244	1.28177	0.18883		1.38281	2.86208	2.01859	3.23125e-12
IL1RN	interleukin 1 receptor antagonist	4.93831	12.1337	1.57162	0.00898204		6.04522	12.9716	2.01776	3.67696e-08
ZNF774	zinc finger protein 774	2.22615	3.26766	1.21055	0.308503		1.4535	3.08593	2.01733	8.4732e-07
PAX6	paired box 6	1.17701	1.2505	0.963133	0.853862		0.598079	1.26377	2.01453	4.64028e-10
TRIM24	tripartite motif containing 24	13.2912	25.9337	1.51918	0.00595348		10.6572	24.3207	2.01419	1.70051e-14
SLC22A3	solute carrier family 22 member 3	1.13803	2.73596	1.47371	0.064516		0.787656	2.97207	2.01334	0.00551345
ACADL	acyl-CoA dehydrogenase, long chain	0.162863	0.16254	0.983167	0.999893		0.0564087	0.177823	2.013	0.00568899
FBXL16	F-box and leucine rich repeat protein 16	0.395342	0.708382	1.47005	0.0284199		0.282805	0.663626	2.01192	8.0114e-06
SOX4	SRY-box 4	13.324	24.4399	1.51042	0.00238596		9.82754	21.9981	2.01145	3.73698e-08
MIR7-3HG	MIR7-3 host gene	0.988038	1.40117	1.18214	0.451979		0.563469	1.42615	2.00972	0.00278463
FOXD2-AS1	FOXD2 antisense RNA 1 (head to head)	0.403896	1.04937	1.64488	0.00801529		0.299956	0.776673	2.00951	0.000159115
MYRF	myelin regulatory factor	6.89968	11.7508	1.40126	0.0519748		4.80729	11.0188	2.0092	4.79613e-15
C9orf152	chromosome 9 open reading frame 152	7.62484	15.1488	1.56418	0.000951514		6.05013	13.4999	2.00892	6.08625e-11
AC093375.1	0	0.798677	1.84302	1.36212	0.158114		0.389941	1.23363	2.00862	0.00411588
FHL3	four and a half LIM domains 3	1.57413	2.58779	1.39571	0.0797965		0.998231	2.63089	2.00698	1.23171e-07
SUCNR1	succinate receptor 1	1.8024	2.05719	1.05837	0.839279		0.86677	1.91046	2.00493	0.000224028
LEF1	lymphoid enhancer binding factor 1	0.843777	1.85562	1.69168	0.000287004		0.602955	1.97726	2.00461	8.95408e-06
PDIA2	protein disulfide isomerase family A member 2	16.471	19.4431	1.09308	0.729427		6.12374	12.1059	2.00306	1.87025e-05
TLL2	tolloid like 2	0.313154	0.29317	0.927971	0.777266		0.158424	0.419473	2.00238	1.79292e-05
CELSR3	cadherin EGF LAG seven-pass G-type receptor 3	0.404427	0.922797	1.34305	0.178884		0.274614	0.665288	1.99854	1.40704e-05
SCAMP4	secretory carrier membrane protein 4	4.34752	8.02188	1.68872	1.71904e-10		3.54816	8.46336	1.99848	2.87528e-17
NYNRIN	NYN domain and retroviral integrase containing	3.37639	5.49564	1.34166	0.0361423		2.2983	5.17264	1.99723	1.54472e-13
RPRD2	regulation of nuclear pre-mRNA domain containing 2	6.31156	10.2061	1.3753	0.00774367		4.55123	10.3398	1.99678	1.6832e-26
KCNK16	potassium two pore domain channel subfamily K member 16	1.72645	2.43359	1.22696	0.292544		0.831161	2.17076	1.99547	0.000685058
FEZF1-AS1	FEZF1 antisense RNA 1	0	0.743174	1.0949	0.40921		0	0.367663	1.99101	0.00345708
FAM167A	family with sequence similarity 167 member A	0.414009	0.741773	1.45026	0.0167414		0.266208	0.66019	1.98668	0.000107875
PROSER1	proline and serine rich 1	3.95612	6.49268	1.33776	0.0387041		2.73901	6.27031	1.98638	1.54576e-09
FLJ23867	#N/A	7.3947	10.6319	1.22662	0.276807		5.53536	12.0288	1.98577	6.94523e-09
DNAH9	dynein axonemal heavy chain 9	0.0230357	0.0243165	0.97887	0.999893		0.0188994	0.0390487	1.98297	0.00389565
MAPK15	mitogen-activated protein kinase 15	0.372056	0.697387	1.45955	0.0551399		0.345257	0.862116	1.98229	0.000394643
ZDHHC1	zinc finger DHHC-type containing 1	1.66029	2.39663	1.23532	0.29754		1.12374	2.43774	1.98097	2.59117e-08
IKZF2	IKAROS family zinc finger 2	1.23061	1.47978	1.09617	0.596089		0.880504	1.76003	1.9787	2.13414e-11
ARID5B	AT-rich interaction domain 5B	14.113	20.3928	1.24782	0.0313178		9.46806	22.1972	1.97855	1.86459e-14
CYSTM1	cysteine rich transmembrane module containing 1	205.892	360.636	1.55848	9.80584e-05		192.354	393.553	1.97831	1.60214e-14
SLC30A2	solute carrier family 30 member 2	1.74519	2.32425	1.22721	0.358812		0.744513	2.43123	1.97613	0.00707455
EDAR	ectodysplasin A receptor	1.17221	1.83637	1.22502	0.304118		0.835445	2.03896	1.97537	1.66531e-07
GJB5	gap junction protein beta 5	0.0548146	1.06278	1.23903	0.16749		0.0801367	0.299362	1.97474	0.00801547
ROR1	receptor tyrosine kinase-like orphan receptor 1	1.84872	2.96057	1.30888	0.124591		1.44688	2.89214	1.97381	7.32818e-16
SHISA9	shisa family member 9	0.0453983	0.0843497	1.2269	0.376862		0.0177688	0.0490599	1.97354	0.00619706
CBLL1	Cbl proto-oncogene like 1	6.32577	11.6299	1.70521	1.35122e-17		5.59459	12.1537	1.97162	7.90966e-19
MBD6	methyl-CpG binding domain protein 6	4.4745	7.13225	1.3898	0.0117118		3.32251	7.49787	1.97107	8.84655e-26
SRRM1	serine and arginine repetitive matrix 1	10.1246	17.2522	1.44778	0.00189319		7.48327	16.8226	1.96727	5.99859e-22
RMST	rhabdomyosarcoma 2 associated transcript (non-protein coding)	2.09417	1.47675	0.853799	0.507181		0.626291	1.36648	1.96544	0.00101569
SLCO2A1	solute carrier organic anion transporter family member 2A1	3.63129	5.44396	1.28315	0.143485		2.64125	6.72936	1.96312	2.84228e-08
SST	somatostatin	74.1373	102.076	1.28796	0.0967855		50.4576	95.7261	1.96311	1.01618e-09
SHROOM4	shroom family member 4	1.42623	2.37883	1.29114	0.122956		0.802423	2.16943	1.96169	8.01379e-11
PHLDA1	pleckstrin homology like domain family A member 1	3.44628	9.82063	1.45585	0.0751168		2.09439	5.37227	1.96113	1.27497e-05
BCL3	B-cell CLL/lymphoma 3	5.4861	9.40526	1.52823	0.00822819		4.5479	11.4008	1.96099	4.62505e-08
PAH	phenylalanine hydroxylase	0.263388	0.372988	1.02471	0.934424		0.113395	0.464184	1.95915	0.00653777
RUNX1	runt related transcription factor 1	3.27627	4.80248	1.21627	0.27304		2.07725	5.26755	1.95873	1.9512e-07
NBEAL2	neurobeachin like 2	8.41848	15.9591	1.39827	0.0727916		5.88714	13.6088	1.95565	2.19266e-08
TCF7L2	transcription factor 7 like 2	8.63879	10.5366	1.11944	0.471622		5.72085	12.4486	1.95471	3.48867e-17
TMEM132B	transmembrane protein 132B	0.252284	0.298547	0.964936	0.881282		0.122738	0.283018	1.95213	5.31874e-05
PLAGL2	PLAG1 like zinc finger 2	3.38168	5.60655	1.44786	0.0123656		2.87985	5.94499	1.95209	5.00253e-09
MUC17	mucin 17, cell surface associated	43.0444	60.7399	1.16166	0.503795		32.5713	83.9481	1.95195	5.81384e-07
DOK7	docking protein 7	0.24309	0.325665	1.07201	0.797966		0.0710439	0.22472	1.9518	0.00288852
SATB2	SATB homeobox 2	0.724867	1.69893	1.47273	0.05041		0.56328	1.29461	1.94858	1.88856e-07
SNTN	sentan, cilia apical structure protein	0.0939936	0.308671	1.34239	0.999893		0.0607582	0.187158	1.94478	0.00959228
ZNF462	zinc finger protein 462	3.36784	5.47547	1.29552	0.146191		2.09563	4.9544	1.94433	2.39487e-10
ARHGEF38-IT1	ARHGEF38 intronic transcript 1	0.931153	1.15468	1.05656	0.844183		0.345748	1.13196	1.94401	0.00879865
MCCC2	methylcrotonoyl-CoA carboxylase 2	14.2878	28.3372	1.60833	0.000174469		13.085	27.3376	1.94376	2.66069e-19
KRT17	keratin 17	0.521037	6.7079	1.88897	0.000397954		0.378117	3.34844	1.94308	0.00876757
C7orf31	chromosome 7 open reading frame 31	1.55613	2.69298	1.41233	0.00385802		1.12507	2.70776	1.94306	3.71525e-09
SVOP	SV2 related protein	0.513912	0.541392	0.96003	0.872528		0.267347	0.555732	1.94204	0.00066511
ZFP57	ZFP57 zinc finger protein	0.252566	2.55411	1.24958	0.16232		0.0475506	0.704906	1.94095	0.00985008
LMLN	leishmanolysin like peptidase	0.687379	1.20802	1.39955	0.0171325		0.480577	1.09883	1.94029	7.39747e-09
CLCF1	cardiotrophin-like cytokine factor 1	0.595289	1.33358	1.32623	0.202781		0.427322	0.952572	1.9401	9.67544e-05
S100A5	S100 calcium binding protein A5	0.558543	0.906038	1.22066	0.390345		0.392639	0.841451	1.93918	0.00378931
RET	ret proto-oncogene	0.644635	0.986747	1.22064	0.28063		0.408271	0.769293	1.93907	1.49038e-07
KCNQ1OT1	KCNQ1 opposite strand/antisense transcript 1 (non-protein coding)	2.06139	2.31645	0.977566	0.919532		1.22698	2.64559	1.93879	5.85437e-11
PPDPF	pancreatic progenitor cell differentiation and proliferation factor	23.4185	47.4662	1.85835	7.13452e-22		24.2925	52.2917	1.93845	4.75924e-14
LGALS9	galectin 9	11.4337	23.9079	1.81047	8.09317e-13		10.8481	24.1429	1.93762	5.96924e-10
SAMD5	sterile alpha motif domain containing 5	3.79968	10.4929	1.5603	0.025323		3.02822	7.78112	1.93745	0.00180426
FAM227A	family with sequence similarity 227 member A	0.119054	0.166797	1.14255	0.58383		0.0536136	0.149102	1.93512	0.00184316
UBLCP1	ubiquitin like domain containing CTD phosphatase 1	6.46853	12.6461	1.76272	7.77058e-14		5.18141	11.4878	1.9348	1.92877e-18
NMUR2	neuromedin U receptor 2	0.192237	3.40464	1.56541	0.0112327		0.0738823	2.30595	1.93471	0.00579835
MECOM	MDS1 and EVI1 complex locus	19.8545	34.0827	1.35362	0.0601518		14.267	31.616	1.93411	4.96887e-10
SERTAD4-AS1	SERTAD4 antisense RNA 1	0.882682	1.53026	1.26697	0.300413		0.436936	1.1472	1.93406	0.00195227
GPX2	glutathione peroxidase 2	42.5681	111.957	1.61318	0.0122264		40.2843	97.5827	1.93367	0.000636522
LINC00443	long intergenic non-protein coding RNA 443	0.00709945	0.101365	1.1776	0.999893		0.0144207	0.234497	1.93363	0.00736509
MYOF	myoferlin	6.81867	15.5673	1.40934	0.0967855		4.76961	13.2409	1.93341	0.000667766
VWA5B2	von Willebrand factor A domain containing 5B2	1.51	1.83708	1.12254	0.578314		0.842862	1.8648	1.93314	6.53742e-06
CST1	cystatin SN	0.157491	0.349849	1.10746	0.999893		0.0800468	0.461488	1.93178	0.0104829
SYT2	synaptotagmin 2	0.637092	0.665974	0.977358	0.92362		0.354601	0.834584	1.93079	1.19118e-11
CTDNEP1	CTD nuclear envelope phosphatase 1	10.0619	19.5223	1.66535	1.08605e-06		8.02067	17.0797	1.93062	2.33923e-16
GLB1L2	galactosidase beta 1 like 2	4.49608	9.95007	1.53385	0.0189364		4.36606	9.12235	1.93008	1.7398e-07
GPR110	#N/A	0.390539	1.20929	1.43098	0.091292		0.463458	0.876739	1.92966	0.00278913
KRTAP5-AS1	KRTAP5-1/KRTAP5-2 antisense RNA 1	1.13008	1.62904	1.22587	0.262815		0.85586	1.972	1.92804	1.13812e-06
CA9	carbonic anhydrase 9	10.0065	22.0062	1.77831	0.000356759		9.75998	24.6544	1.92635	0.00204627
MYC	v-myc avian myelocytomatosis viral oncogene homolog	16.4786	29.8018	1.46954	0.0136747		14.2146	28.7321	1.92569	2.47022e-09
LHFPL3	lipoma HMGIC fusion partner-like 3	1.4724	1.50771	1.01882	0.938255		0.867782	2.20392	1.9251	5.22079e-07
TAS2R3	taste 2 receptor member 3	1.46969	1.23723	0.812466	0.341951		0.598108	1.56049	1.9214	0.000978253
DSG3	desmoglein 3	10.0928	18.91	1.46175	0.0295125		4.5026	12.6555	1.92134	0.00325281
LOC254896	#N/A	0.44766	0.776034	1.28118	0.271889		0.236719	0.738812	1.9207	0.00463415
NFIA	nuclear factor I A	8.37947	12.742	1.25581	0.0614274		5.6658	12.7288	1.91981	8.1919e-15
ATN1	atrophin 1	4.87812	6.96794	1.19259	0.339664		3.27126	7.00303	1.91915	6.53992e-23
MLXIP	MLX interacting protein	8.91711	15.3207	1.36447	0.0509413		7.21504	15.3216	1.9188	5.04186e-11
MPV17L	MPV17 mitochondrial inner membrane protein like	4.99547	8.34013	1.48408	0.000780549		4.76583	9.78675	1.91873	2.93494e-12
ELF5	E74 like ETS transcription factor 5	3.31742	3.41887	0.998747	0.999893		0.133063	2.1313	1.91864	0.00643185
PTPRU	protein tyrosine phosphatase, receptor type U	0.45345	0.359439	0.848536	0.493693		0.18115	0.486359	1.91842	5.95215e-05
KCTD1	potassium channel tetramerization domain containing 1	2.47894	3.23932	1.11873	0.551544		1.61245	3.38022	1.91798	9.60157e-08
BTBD16	BTB domain containing 16	0.0878002	0.454532	1.43009	0.0673573		0.0491092	0.241372	1.9179	0.0112263
MAPK1IP1L	mitogen-activated protein kinase 1 interacting protein 1-like	11.3722	19.6668	1.53338	4.55205e-06		9.34292	20.005	1.9173	2.72047e-29
MMP19	matrix metallopeptidase 19	1.86133	3.49324	1.52545	0.00391751		1.52124	3.44906	1.91499	6.27248e-14
MRAP2	melanocortin 2 receptor accessory protein 2	4.18021	7.72117	1.40681	0.0509767		3.34476	7.70307	1.9138	3.52952e-05
MANSC1	MANSC domain containing 1	11.1144	19.9067	1.52003	0.000709998		9.24704	20.2183	1.91357	2.47231e-25
ISL1	ISL LIM homeobox 1	2.01224	2.3396	1.05353	0.830781		1.27189	2.40598	1.91268	5.10838e-06
NEUROD2	neuronal differentiation 2	0.0728451	0.0787242	1.01978	0.999893		0.0263472	0.10179	1.91116	0.0119517
TRPM2-AS	TRPM2 antisense RNA	0.182699	0.821571	1.33602	0.126219		0.0850129	0.307729	1.91087	0.0118281
MUC20	mucin 20, cell surface associated	4.65864	8.12438	1.41905	0.0247412		3.98918	8.54154	1.91052	1.50595e-07
TRH	thyrotropin releasing hormone	0.0550055	0.0328899	0.933574	0.999893		0	0.126508	1.91014	0.00722103
CYP4F8	cytochrome P450 family 4 subfamily F member 8	0.0242142	0.267917	1.65107	0.999893		0.00622459	0.144272	1.91012	0.00833252
ALDH4A1	aldehyde dehydrogenase 4 family member A1	0.804404	1.77219	1.50588	0.036023		0.754385	1.66066	1.90962	0.000317441
ENAM	enamelin	0.465511	0.428396	0.902697	0.656036		0.256055	0.600246	1.9096	1.27228e-06
DACT1	dishevelled binding antagonist of beta catenin 1	4.75888	8.99872	1.53849	0.00666672		3.01156	8.34343	1.9083	0.00441078
LINC00950	long intergenic non-protein coding RNA 950	0.199928	0.26201	1.10669	0.668125		0.128167	0.295968	1.90762	0.000483776
SPTBN2	spectrin beta, non-erythrocytic 2	0.993172	2.18739	1.42428	0.092299		0.733141	1.63035	1.90744	0.000138611
NR4A1	nuclear receptor subfamily 4 group A member 1	5.70896	9.41455	1.12818	0.626402		2.94337	13.3343	1.90507	0.0123289
KCNJ14	potassium voltage-gated channel subfamily J member 14	0.237481	0.512612	1.60688	0.00898204		0.189235	0.411834	1.90499	0.00315524
RBFOX1	RNA binding protein, fox-1 homolog 1	0.0472458	0.0473053	0.984309	0.999893		0.0176352	0.0529586	1.90465	0.012525
ZNF703	zinc finger protein 703	2.87468	6.4265	1.57387	0.0130825		2.08188	4.7695	1.90457	9.135e-06
DNAH8	dynein axonemal heavy chain 8	0.045666	0.0586203	1.07876	0.780652		0.0241626	0.0639391	1.90414	0.00412915
RP5-1159O4.2	0	0.772746	1.01892	1.11981	0.627483		0.564185	1.10146	1.90231	1.27748e-05
G6PC2	glucose-6-phosphatase catalytic subunit 2	0.578242	0.40109	0.789091	0.247338		0.19332	0.440376	1.90099	0.00890205
DAPL1	death associated protein like 1	0.764502	1.68897	1.52026	0.0346193		0.771808	1.82127	1.90057	0.00151865
ANK1	ankyrin 1	0.448922	0.582677	1.0827	0.717464		0.199949	0.513467	1.89861	0.000170962
IQSEC1	IQ motif and Sec7 domain 1	4.04867	5.58061	1.22603	0.129872		2.65046	5.53139	1.89859	4.56353e-14
ARHGDIA	Rho GDP dissociation inhibitor alpha	37.8198	75.8151	1.9494	7.35309e-18		36.9854	80.2296	1.89768	7.79336e-24
CLMN	calmin (calponin-like, transmembrane)	4.78897	7.52839	1.23359	0.190692		3.32267	6.82264	1.89709	3.90378e-10
DUOX1	dual oxidase 1	1.13269	1.43365	1.08707	0.668848		0.639661	1.26952	1.89654	1.94068e-08
ZNRF3	zinc and ring finger 3	3.07396	6.45739	1.58571	0.00661628		2.36166	4.87504	1.89644	2.22971e-06
APOOL	apolipoprotein O like	3.17537	5.44007	1.51411	5.92992e-06		2.84225	5.81066	1.89527	2.65379e-11
FEV	FEV, ETS transcription factor	1.7573	2.88115	1.27346	0.201548		1.1737	2.39016	1.89425	4.63359e-05
NPAS2	neuronal PAS domain protein 2	6.18874	8.92787	1.28828	0.14089		4.11241	8.70698	1.89403	1.64027e-14
C1orf198	chromosome 1 open reading frame 198	6.61348	13.4679	1.69327	3.4665e-07		5.58742	12.0729	1.89331	5.04096e-15
ZNF503	zinc finger protein 503	6.48095	7.79287	1.10405	0.650977		4.11535	8.52432	1.89293	3.42045e-09
WNK4	WNK lysine deficient protein kinase 4	1.32155	2.16981	1.28109	0.234096		0.831088	1.81752	1.89243	3.68317e-06
UBE2V1	ubiquitin conjugating enzyme E2 V1	8.2796	15.6197	1.70348	1.4859e-10		6.89175	15.0605	1.89154	6.58089e-25
ABCC8	ATP binding cassette subfamily C member 8	1.37559	1.37542	0.896137	0.567476		0.664103	1.47001	1.88978	0.000433399
KLHL35	kelch like family member 35	0.405253	0.670535	1.19089	0.464117		0.324985	0.503348	1.88902	0.00390925
SHANK2	SH3 and multiple ankyrin repeat domains 2	2.60085	3.1064	1.0218	0.920523		1.61032	3.33056	1.88891	8.41266e-11
LINC00964	long intergenic non-protein coding RNA 964	0.089777	0.0996652	1.05106	0.999893		0.0414636	0.117443	1.88811	0.0120015
SLC25A23	solute carrier family 25 member 23	11.0749	20.3374	1.77446	1.99955e-09		11.0211	21.0574	1.88712	3.49921e-10
NEK10	NIMA related kinase 10	4.10428	2.61702	0.753736	0.184478		1.82613	4.27857	1.88673	0.000116435
GPR37L1	G protein-coupled receptor 37 like 1	0.143082	0.323737	1.43307	0.0914309		0.114744	0.317763	1.88665	0.00441434
LRRIQ4	leucine rich repeats and IQ motif containing 4	0.162775	0.328209	1.33906	0.185113		0.128344	0.278459	1.88361	0.00694281
KMT2A	lysine methyltransferase 2A	9.32165	12.3417	1.15047	0.236076		6.12786	13.5764	1.88338	2.04607e-16
PGC	progastricsin	910.507	1180.95	1.02616	0.895188		18.5024	1235.85	1.88305	0.00668058
FAM47E	family with sequence similarity 47 member E	1.63973	2.40412	1.1754	0.425088		0.944965	1.98262	1.88252	4.40276e-05
RAB15	RAB15, member RAS oncogene family	10.0485	15.6645	1.43653	0.000438117		7.70666	15.2293	1.88203	5.32248e-12
SDK2	sidekick cell adhesion molecule 2	0.28379	0.267855	0.940728	0.800866		0.116348	0.299887	1.88202	2.10823e-05
PRR12	proline rich 12	2.15619	2.80008	1.15084	0.429031		1.41411	3.04414	1.88186	2.30197e-11
FSIP2	fibrous sheath interacting protein 2	0.768901	0.911213	1.04454	0.827362		0.478968	0.948413	1.88151	5.95109e-07
FRMPD2	FERM and PDZ domain containing 2	0.0464461	0.0341797	0.898234	0.999893		0.00602461	0.0480498	1.88089	0.0107714
PWAR1	Prader Willi/Angelman region RNA 1	0.236268	0.23522	0.992239	0.980645		0.130414	0.271682	1.88056	0.00575789
RP11-234B24.2	0	1.20461	2.57164	1.61802	0.00680457		1.12199	2.37735	1.8787	2.26489e-06
PKDCC	protein kinase domain containing, cytoplasmic	21.9501	42.336	1.43998	0.0621644		14.8306	31.5955	1.87848	1.68284e-06
HCFC1	host cell factor C1	7.40963	10.4937	1.2845	0.0872401		5.34105	11.2891	1.87822	1.21509e-17
MGC27345	#N/A	0.879426	1.57206	1.46091	0.000613938		0.682385	1.48154	1.87582	9.52201e-15
CCND2	cyclin D2	76.0984	134.84	1.49886	0.00103666		56.8828	124.02	1.87457	6.09234e-08
SPTSSB	serine palmitoyltransferase small subunit B	0.409085	0.465735	1.01066	0.973424		0.298267	0.5878	1.87353	0.00455874
ACSM3	acyl-CoA synthetase medium-chain family member 3	12.2076	17.6781	1.18635	0.346238		8.9762	16.246	1.8735	5.421e-09
INSM1	INSM transcriptional repressor 1	2.05539	2.82958	1.13407	0.563058		1.40499	2.72158	1.87149	4.8101e-07
MAPRE2	microtubule associated protein RP/EB family member 2	5.96812	10.175	1.45235	0.000265628		4.64345	9.77426	1.87127	1.01988e-20
RAB3A	RAB3A, member RAS oncogene family	0.722816	1.10595	1.35305	0.101552		0.503042	1.1316	1.87034	0.000639927
TOX3	TOX high mobility group box family member 3	6.1697	7.49084	1.09253	0.537061		4.32675	8.7314	1.87002	1.32718e-27
SP5	Sp5 transcription factor	1.58756	2.34031	1.24469	0.338178		0.993305	2.12663	1.86866	0.000192023
FAM155A	family with sequence similarity 155 member A	0.429723	0.939234	1.27682	0.279291		0.287739	0.872882	1.86648	0.00393342
TEKT2	tektin 2	0.204165	0.168831	0.904597	0.999893		0.0654065	0.196454	1.86578	0.0160447
PGM2L1	phosphoglucomutase 2-like 1	1.90383	3.78215	1.43847	0.0367071		1.53085	3.66468	1.86472	1.44905e-05
DNAH6	dynein axonemal heavy chain 6	0.329036	0.501809	1.19762	0.344637		0.243125	0.374727	1.86461	0.00137599
PROX1	prospero homeobox 1	2.64159	4.13216	1.23911	0.159799		1.79875	3.95548	1.86393	1.87964e-07
TNFRSF10C	tumor necrosis factor receptor superfamily member 10c	0.96339	1.56869	1.2489	0.33247		0.480846	1.34749	1.86223	0.00128135
PRSS33	protease, serine 33	0.248399	0.611449	1.52936	0.0346429		0.111619	0.320797	1.85949	0.00939059
LZTS3	#N/A	6.02528	8.11673	1.16473	0.36224		3.59139	7.4488	1.85837	2.77903e-09
KCTD14	potassium channel tetramerization domain containing 14	4.28466	8.67116	1.56114	0.00448367		3.24315	6.7607	1.85614	1.74581e-08
LATS1	large tumor suppressor kinase 1	7.34547	11.154	1.40791	9.58732e-05		5.49163	11.5259	1.85548	5.73117e-17
LOC100507462	#N/A	0.0981614	0.190894	1.35207	0.999893		0.132158	0.232157	1.85503	0.0061345
MLK7-AS1	MLK7 antisense RNA 1	2.55083	6.11923	1.31445	0.209459		2.37142	5.77446	1.8534	0.000292022
E2F8	E2F transcription factor 8	2.01023	3.53362	1.34308	0.124873		2.19421	5.4624	1.85252	0.000192356
CYP2E1	cytochrome P450 family 2 subfamily E member 1	0.741583	3.01781	1.23338	0.273558		0.297392	1.01153	1.85215	0.00929017
GPER1	G protein-coupled estrogen receptor 1	0.733061	0.671811	0.91093	0.719539		0.352697	0.733288	1.8512	0.000173405
PACSIN1	protein kinase C and casein kinase substrate in neurons 1	0.129734	0.116731	0.911959	0.728212		0.0700957	0.157456	1.85104	0.00453236
NUP214	nucleoporin 214	6.39343	9.46779	1.28001	0.0258763		4.56271	9.55112	1.84972	3.74249e-20
FOXRED2	FAD dependent oxidoreductase domain containing 2	1.78635	2.51308	1.24989	0.163163		1.43668	3.03944	1.8496	2.51348e-15
C15orf39	chromosome 15 open reading frame 39	4.39911	7.16706	1.51474	0.000437763		3.63648	7.8724	1.84878	1.49516e-26
ZFHX3	zinc finger homeobox 3	2.45833	3.30726	1.0929	0.627483		1.62091	3.39684	1.84847	5.46335e-10
EGFR	epidermal growth factor receptor	6.41785	10.0552	1.30455	0.0170566		4.88014	10.1738	1.84662	2.84938e-19
EPHX3	epoxide hydrolase 3	0.127172	0.14263	1.03317	0.999893		0.115328	0.293976	1.84621	0.0128605
CCL2	C-C motif chemokine ligand 2	7.49815	14.7662	1.43178	0.0545177		6.2288	15.7184	1.84616	6.2912e-05
KCNC1	potassium voltage-gated channel subfamily C member 1	0.0582403	0.06068	1.01438	0.963223		0.0366542	0.0764414	1.84592	0.00649789
RNF43	ring finger protein 43	28.8106	40.2528	1.24233	0.226648		18.1162	38.9835	1.84293	0.000427286
IFI6	interferon alpha inducible protein 6	32.9945	65.6627	1.45485	0.0399921		24.1085	52.5521	1.84234	2.50432e-08
SEPT3	septin 3	0.0910803	0.249632	1.70662	0.00469694		0.0833751	0.226062	1.84155	0.00470345
MOGAT1	monoacylglycerol O-acyltransferase 1	0.100647	0.139176	1.04239	0.999893		0.047682	0.207576	1.84153	0.0175247
CDK5R2	cyclin dependent kinase 5 regulatory subunit 2	0.123204	0.201928	1.24369	0.999893		0.0289466	0.123979	1.84107	0.0184557
PHF12	PHD finger protein 12	5.41207	8.00148	1.36559	0.00156936		3.8243	8.25112	1.83987	2.09814e-26
MMP12	matrix metallopeptidase 12	2.58234	4.62521	1.32077	0.202561		1.58013	5.78896	1.83923	0.0154906
PPRC1	peroxisome proliferator-activated receptor gamma, coactivator-related 1	3.32446	6.39872	1.523	0.00767912		2.7851	5.71715	1.83916	1.04296e-13
FAM222A	family with sequence similarity 222 member A	4.00912	6.2695	1.4727	0.000126024		3.4406	7.14453	1.83843	4.04991e-09
C3orf36	chromosome 3 open reading frame 36	0.101647	0.246466	1.30792	0.999893		0.12891	0.272926	1.83824	0.0130344
CERS6-AS1	CERS6 antisense RNA 1	36.6226	66.8095	1.46023	0.00462094		27.7635	58.8652	1.83786	9.70696e-10
LOC284837	#N/A	0.240935	0.43874	1.36747	0.113799		0.126666	0.320672	1.83653	0.0010862
NMU	neuromedin U	0.237114	1.97414	1.40627	0.0626857		0.351012	0.697645	1.83601	0.0165244
PGAP1	post-GPI attachment to proteins 1	5.82097	10.7876	1.27851	0.226527		4.08523	8.1063	1.8347	1.2089e-06
GNRHR	gonadotropin releasing hormone receptor	0.376273	0.281019	0.731166	0.0551727		0.252126	0.465434	1.83419	0.000561029
HOXA10-AS	HOXA10 antisense RNA	0.0213026	2.49717	1.19761	0.192628		0.00744169	1.27616	1.83306	0.00888
REG3G	regenerating family member 3 gamma	0.907579	1.13036	1.14326	0.591243		0.600893	4.22529	1.83275	0.0197294
SHANK2-AS1	SHANK2 antisense RNA 1	0.24627	0.24605	0.97301	0.926336		0.1219	0.294643	1.83179	0.0120015
C16orf45	chromosome 16 open reading frame 45	4.96596	6.24821	1.20582	0.189971		3.50189	7.13509	1.83076	2.59117e-08
GPR64	#N/A	0.776797	0.82717	0.952775	0.830288		0.510907	1.02314	1.83044	3.95179e-06
CXCL3	C-X-C motif chemokine ligand 3	0.511466	1.79279	1.37934	0.123911		0.358114	2.76264	1.82976	0.0202049
SLC16A8	solute carrier family 16 member 8	0.361877	0.536562	1.16305	0.528223		0.229291	0.634688	1.82808	0.00303661
TMEM198B	transmembrane protein 198B (pseudogene)	3.28324	5.38275	1.37172	0.0191339		2.65164	5.25514	1.82599	3.93559e-09
MBOAT4	membrane bound O-acyltransferase domain containing 4	0.736389	0.664199	0.867759	0.523497		0.391738	0.985418	1.82507	0.00168067
EFCAB14	EF-hand calcium binding domain 14	32.3617	52.9969	1.48328	2.59933e-06		25.6616	52.581	1.82472	9.57808e-28
MANEAL	mannosidase endo-alpha like	2.38934	4.51952	1.42315	0.0521493		1.77861	3.61212	1.82452	6.1436e-05
STS	steroid sulfatase (microsomal), isozyme S	2.29396	3.29563	1.30567	0.111246		1.58654	3.59277	1.82436	2.27095e-07
PHACTR4	phosphatase and actin regulator 4	5.63301	8.69706	1.34419	0.00331052		4.48753	8.89995	1.82421	6.55054e-35
SLC26A9	solute carrier family 26 member 9	0.0198036	0.047592	1.09912	0.999893		0.00679908	0.0669932	1.82419	0.014996
GLYATL1	glycine-N-acyltransferase like 1	0.711058	0.979941	1.10206	0.65391		0.661096	1.296	1.82315	0.000240212
GPR26	G protein-coupled receptor 26	0.0201761	0.0153615	0.939056	0.999893		0.0189994	0.0321101	1.8227	0.0206724
GSDMA	gasdermin A	0.455577	1.25665	1.55404	0.0306518		0.322402	0.846327	1.82111	0.00101524
KCNN2	potassium calcium-activated channel subfamily N member 2	0.092323	0.0732519	0.925421	0.999893		0.0458026	0.165335	1.82024	0.0199359
CREB5	cAMP responsive element binding protein 5	0.205386	0.312178	1.18493	0.465729		0.146188	0.378915	1.82018	0.00303839
MOSPD3	motile sperm domain containing 3	2.07496	3.28742	1.45553	0.00467547		1.75184	3.44692	1.81937	2.78354e-07
KIAA1024	KIAA1024	0.323151	0.412893	1.12648	0.50629		0.197328	0.402927	1.81935	4.47667e-05
RARB	retinoic acid receptor beta	3.38448	2.82254	0.859551	0.419002		1.91523	4.29385	1.81916	2.87727e-06
MIR181A2HG	MIR181A2 host gene	1.43416	1.39809	0.875656	0.574014		0.721736	1.80399	1.81916	0.00190342
DUSP7	dual specificity phosphatase 7	1.80945	3.06036	1.45714	0.0141099		1.42915	2.85412	1.81906	5.46448e-14
TSPAN1	tetraspanin 1	33.4302	54.339	1.27906	0.247236		22.8475	50.6871	1.81861	2.06215e-05
BLACAT1	bladder cancer associated transcript 1 (non-protein coding)	0.536005	1.0453	1.31866	0.213422		0.445685	1.05449	1.81779	0.000527876
ELK4	ELK4, ETS transcription factor	6.48905	10.2721	1.42105	7.20728e-05		4.6959	9.99196	1.81637	4.58536e-13
HYMAI	Hydatidiform mole associated and imprinted conserved region 1	0.267798	0.241279	0.895526	0.633844		0.149022	0.312302	1.81561	0.000696164
FOXA3	forkhead box A3	6.44608	10.7999	1.45964	0.00812753		5.20375	9.59049	1.81557	1.77311e-08
EYS	eyes shut homolog (Drosophila)	0.626636	0.670373	0.958359	0.81589		0.347501	0.733364	1.81525	2.00929e-08
LEFTY1	left-right determination factor 1	0.243372	0.857386	1.29578	0.206457		0.160923	0.77025	1.81503	0.0218577
SLC5A8	solute carrier family 5 member 8	0.344333	0.112484	0.713883	0.0834291		0.0651901	0.212681	1.8147	0.0218169
C2CD4A	C2 calcium dependent domain containing 4A	0.663081	2.14856	1.42418	0.0969083		0.550427	1.64027	1.81457	0.0150739
TLE1	transducin like enhancer of split 1	2.51902	6.09764	1.55871	0.00981955		1.97243	4.66724	1.81454	8.99374e-05
NUDT11	nudix hydrolase 11	0.554235	1.90646	1.36475	0.152506		0.512473	0.979858	1.81408	0.000174641
LOC100129617	#N/A	1.24156	1.4897	1.05937	0.825903		0.806226	1.71117	1.81401	1.42256e-05
FMN1	formin 1	2.1292	2.92698	1.14109	0.394037		1.36399	2.78314	1.81328	1.46114e-11
SBK1	SH3 domain binding kinase 1	0.114815	0.161879	1.14187	0.593767		0.0886342	0.184886	1.81322	0.00524854
ZFHX2	zinc finger homeobox 2	0.260549	0.290564	1.00745	0.979775		0.159131	0.323546	1.81225	3.70041e-05
UCA1	Urothelial cancer associated 1 conserved region	0.515102	1.12409	1.43955	0.0815328		0.474902	1.08924	1.81224	0.00113341
C8orf47	#N/A	7.73908	5.9492	0.77946	0.175262		4.15757	7.61108	1.81213	2.18788e-09
ZDHHC2	zinc finger DHHC-type containing 2	10.3176	14.4005	1.2765	0.16557		7.62217	16.6771	1.81037	6.36426e-07
ALPK3	alpha kinase 3	0.387443	0.538555	1.26413	0.0846939		0.24902	0.561293	1.81016	3.73698e-08
SRPRA	SRP receptor alpha subunit	28.696	49.5318	1.65896	3.81022e-25		24.1562	48.4016	1.81015	1.22667e-28
GLB1L3	galactosidase beta 1 like 3	0.0130884	0.0738694	1.17799	0.999893		0.00399378	0.0766189	1.81015	0.0136064
ETV6	ETS variant 6	7.20285	11.7675	1.33599	0.0202553		5.50405	11.4746	1.80994	3.6293e-12
RP11-142C4.6	0	0.118426	0.198775	1.14067	0.999893		0.0473169	0.129225	1.80797	0.0212526
PLXNB3	plexin B3	0.340322	0.39163	1.03948	0.888146		0.153622	0.332654	1.80786	0.000500425
GLS2	glutaminase 2	1.37539	2.16954	1.3505	0.0475249		0.853274	1.80258	1.80717	3.18471e-06
ZFP69B	ZFP69 zinc finger protein B	1.23444	2.17152	1.40419	0.0247398		0.779518	1.56131	1.80713	0.000127732
PARM1	prostate androgen-regulated mucin-like protein 1	6.00132	6.80627	0.996712	0.991237		3.4355	7.31432	1.80623	7.63124e-07
MT1M	metallothionein 1M	21.3281	42.0136	1.37489	0.127232		29.3194	48.8307	1.80573	0.00261965
RP11-93B14.5	#N/A	1.12357	2.51706	1.52377	0.0350968		1.12703	2.40204	1.80498	0.000554229
CERS6	ceramide synthase 6	38.9548	69.24	1.43118	0.00885291		30.0937	60.2347	1.80469	4.75225e-10
KLK1	kallikrein 1	6.90534	14.3422	1.40637	0.0446878		7.55968	12.238	1.80405	8.033e-09
CYP27B1	cytochrome P450 family 27 subfamily B member 1	0.495695	0.963437	1.4548	0.0436592		0.360063	0.792874	1.80386	0.00109964
SPAG17	sperm associated antigen 17	0.507301	0.600061	1.08101	0.74258		0.305431	0.597414	1.80314	3.06941e-05
CCNK	cyclin K	7.02003	11.3132	1.28828	0.127133		5.72482	11.1772	1.80267	2.37555e-08
ASPHD1	aspartate beta-hydroxylase domain containing 1	1.36716	2.78938	1.53311	0.0280588		0.558619	1.85679	1.79949	0.00900277
SPDYE3	speedy/RINGO cell cycle regulator family member E3	0.340581	0.453826	1.15427	0.484027		0.237003	0.442311	1.79931	0.00169355
POPDC3	popeye domain containing 3	0.111881	0.170898	1.08416	0.999893		0.0148814	0.0887533	1.79819	0.0196569
EVA1A	eva-1 homolog A, regulator of programmed cell death	0.628931	1.18216	1.44393	0.0626857		0.477797	1.12348	1.79793	0.00083948
ENC1	ectodermal-neural cortex 1	12.7553	27.5835	1.43482	0.0664206		9.9209	24.5508	1.79749	0.000724324
TDRD5	tudor domain containing 5	0.521402	1.33532	1.56682	0.0179987		0.453375	1.2093	1.79646	0.000869357
MAP2	microtubule associated protein 2	0.255191	0.276283	0.964874	0.896435		0.205204	0.327895	1.79494	7.92492e-05
CNNM1	cyclin and CBS domain divalent metal cation transport mediator 1	0.297891	0.413672	1.25603	0.247675		0.228298	0.512974	1.79472	0.00011983
C17orf96	chromosome 17 open reading frame 96	0.229736	0.693891	1.66587	0.00919846		0.26057	0.60366	1.79455	0.00598052
SAMD13	sterile alpha motif domain containing 13	1.70968	3.14719	1.37512	0.0753851		1.46796	2.8018	1.79425	1.94237e-05
NT5C1B	5'-nucleotidase, cytosolic IB	0.694821	0.838527	1.08568	0.711894		0.50333	0.925251	1.79362	4.80718e-05
CHDH	choline dehydrogenase	10.5255	17.1672	1.39544	0.0162958		7.0943	14.32	1.79283	4.96192e-06
EPHB4	EPH receptor B4	8.78171	17.4059	1.53279	0.0122801		7.13697	14.081	1.79261	3.87394e-06
CUEDC1	CUE domain containing 1	2.94101	4.0973	1.21166	0.317052		2.0027	4.02812	1.79243	7.24613e-07
R3HDM2	R3H domain containing 2	9.43527	14.8876	1.34152	0.0136063		7.13619	14.647	1.79232	2.33998e-14
CXCL9	C-X-C motif chemokine ligand 9	1.73515	1.70516	1.03232	0.91261		1.55631	2.64835	1.79205	0.00153448
SAP30L-AS1	SAP30L antisense RNA 1 (head to head)	1.2245	1.67547	1.18024	0.306027		0.824676	1.83111	1.79163	1.40687e-05
CKMT2	creatine kinase, mitochondrial 2	1.43181	1.7476	1.08928	0.715868		0.831046	1.75639	1.79158	0.000129397
ZFP36	ZFP36 ring finger protein	29.6653	36.5811	1.1958	0.304709		24.969	60.0975	1.79075	0.0036664
ANKFN1	ankyrin repeat and fibronectin type III domain containing 1	0.0865753	0.231629	1.35905	0.999893		0.084017	0.236296	1.79053	0.0178418
LOC730102	#N/A	13.6777	23.7114	1.42614	0.0182678		12.3764	24.4021	1.79042	1.08261e-10
PAX4	paired box 4	0.342562	0.594641	1.16938	0.516815		0.284584	0.665354	1.78952	0.0050376
FERMT1	fermitin family member 1	21.3585	38.1179	1.40428	0.0519748		16.5631	34.0122	1.78887	8.41899e-08
APOD	apolipoprotein D	3.12813	5.16175	1.37492	0.0873883		2.24328	5.74282	1.78835	5.46448e-05
KCTD4	potassium channel tetramerization domain containing 4	0.539776	0.538467	0.901129	0.669635		0.312423	0.641184	1.788	0.00399929
SRRM2	serine/arginine repetitive matrix 2	38.9446	50.6759	1.06897	0.767474		24.1688	51.3352	1.78788	1.90445e-08
EFNB3	ephrin B3	0.137292	0.265065	1.27202	0.291103		0.13882	0.317826	1.78745	0.0036399
LINC00668	long intergenic non-protein coding RNA 668	1.45759	10.7347	1.50361	0.0267354		2.1103	8.13135	1.78722	0.0254298
IQCH	IQ motif containing H	0.415897	0.546874	1.10527	0.596612		0.262306	0.532757	1.78494	4.75439e-05
LOC100131289	#N/A	1.32717	2.4225	1.38661	0.113444		1.17651	1.92678	1.78452	0.00344474
IGFBP2	insulin like growth factor binding protein 2	49.7838	73.1935	1.28687	0.131049		36.9609	72.6999	1.78408	0.00404818
NUPR1L	#N/A	1.23039	0.862027	0.91962	0.71771		0.235911	0.49662	1.78318	0.0269477
SYT7	synaptotagmin 7	0.913303	1.26676	1.23728	0.132582		0.61075	1.24613	1.78307	3.36225e-08
NFAT5	nuclear factor of activated T-cells 5, tonicity-responsive	7.38312	8.56169	0.973119	0.893414		4.56636	9.3251	1.78307	2.33594e-09
WFDC2	WAP four-disulfide core domain 2	2.21947	5.79159	1.38346	0.13424		1.54776	3.76795	1.78296	0.00264773
IER3	immediate early response 3	10.1993	22.8351	1.45374	0.0602349		7.89774	20.7428	1.78294	0.00427665
ST18	ST18, C2H2C-type zinc finger	1.14773	1.58359	1.1554	0.350068		0.792257	1.53992	1.78285	2.71971e-06
NOL4L	nucleolar protein 4 like	9.36134	14.1541	1.46239	2.3495e-05		8.05518	15.7886	1.78226	1.95659e-18
TSHZ2	teashirt zinc finger homeobox 2	1.84302	2.47445	1.13246	0.469067		1.0317	2.35588	1.7821	2.27964e-06
PLCD3	phospholipase C delta 3	3.63338	14.3593	1.62138	0.0153691		4.42086	10.2755	1.78194	0.0031191
ALG1L	ALG1, chitobiosyldiphosphodolichol beta-mannosyltransferase-like	0.28837	0.472534	1.18468	0.999893		0.176844	0.433305	1.78183	0.0212777
TMPRSS3	transmembrane protease, serine 3	3.04915	4.26948	1.15371	0.531615		2.53462	5.5323	1.78172	6.11069e-06
CTTNBP2	cortactin binding protein 2	2.03202	2.52249	1.09817	0.517593		1.3405	2.74625	1.7814	2.28452e-16
RNF44	ring finger protein 44	4.57464	6.87818	1.39901	0.0129483		3.38032	6.62425	1.78118	5.73949e-11
ANXA10	annexin A10	34.9845	157.362	1.47534	0.0486607		31.7497	163.041	1.78047	0.0226531
PYY2	peptide YY, 2 (pseudogene)	0.359231	0.489639	1.10823	0.69197		0.120736	0.366441	1.77963	0.0243166
PCCA-AS1	PCCA antisense RNA 1	1.245	1.08256	0.885234	0.629464		0.551108	1.38104	1.77927	0.0128636
DNAH5	dynein axonemal heavy chain 5	0.0638104	0.0592133	0.866114	0.551694		0.0364062	0.0867621	1.77926	0.00486259
DLEU2L	deleted in lymphocytic leukemia 2-like	0.51205	0.502379	0.949715	0.844115		0.313943	0.50565	1.77909	0.00908044
ROBO2	roundabout guidance receptor 2	0.423642	0.574961	1.11407	0.543107		0.302087	0.764005	1.77837	1.11265e-05
TRNP1	TMF1-regulated nuclear protein 1	3.33301	7.32383	1.34867	0.166587		3.28081	8.87683	1.7782	0.00582514
HOXA10	homeobox A10	0.0106566	1.91499	1.28298	0.098312		0.0055183	0.962497	1.77813	0.0126394
SETD5	SET domain containing 5	13.4672	18.618	1.22474	0.0442036		9.44155	18.6218	1.77753	1.78681e-14
BCOR	BCL6 corepressor	7.88681	9.48388	1.11027	0.33435		5.43024	10.8722	1.77689	8.67233e-21
CLIP3	CAP-Gly domain containing linker protein 3	0.632649	1.11209	1.42258	0.0452587		0.490911	1.05034	1.77654	1.56658e-05
HCAR1	hydroxycarboxylic acid receptor 1	0.131596	0.1937	1.1547	0.556862		0.0497669	0.145053	1.77578	0.0228799
CXCL5	C-X-C motif chemokine ligand 5	0.23994	1.56279	1.22846	0.226872		0.0400146	1.31124	1.77481	0.0155883
PPP1R1C	protein phosphatase 1 regulatory inhibitor subunit 1C	0.118497	0.156711	1.08979	0.748563		0.0951184	0.231688	1.77454	0.00620851
SLC6A14	solute carrier family 6 member 14	0.246944	1.15612	1.36283	0.120572		0.30407	1.19344	1.77417	0.0241103
SMOC2	SPARC related modular calcium binding 2	10.17	14.9048	1.09179	0.737408		6.9619	12.9941	1.77291	2.12745e-07
ZNF69	zinc finger protein 69	2.57556	4.92015	1.43717	0.0308819		2.22481	4.48017	1.77212	6.43033e-06
NUTM2G	NUT family member 2G	0.200653	0.228465	1.00579	0.98509		0.133695	0.276798	1.77171	0.00103481
DAGLA	diacylglycerol lipase alpha	0.88984	1.4855	1.42759	0.0300459		0.672426	1.44211	1.77142	9.05465e-07
LOC101926889	#N/A	0.162625	0.281891	1.25476	0.319091		0.135382	0.260299	1.77122	0.0138333
KCNJ11	potassium voltage-gated channel subfamily J member 11	0.680492	0.778845	1.04481	0.861281		0.400834	0.74841	1.77049	0.000351829
JPH1	junctophilin 1	0.581058	1.18828	1.30506	0.229179		0.434832	0.930569	1.77046	0.00139031
PCBP2-OT1	PCBP2 overlapping transcript 1	27.2266	42.6844	1.15685	0.486296		21.8827	43.7505	1.77041	4.69744e-06
GDPD5	glycerophosphodiester phosphodiesterase domain containing 5	1.21599	1.90891	1.40101	0.0613577		0.992362	1.94202	1.76899	9.64637e-08
KRTAP5-2	keratin associated protein 5-2	1.20837	1.65793	1.1789	0.449509		0.875046	1.95389	1.76892	0.00186417
KIAA0754	#N/A	4.84555	7.56707	1.27731	0.141087		3.35243	7.0935	1.76838	3.50627e-08
LINC01101	long intergenic non-protein coding RNA 1101	0.035644	0.0615718	1.08202	0.999893		0.00735775	0.0895213	1.76813	0.0223694
IRX3	iroquois homeobox 3	0.390644	0.208998	0.851371	0.399576		0.0473598	0.141298	1.76764	0.0297062
TAS2R5	taste 2 receptor member 5	0.946341	0.998484	0.973302	0.918121		0.534018	1.04512	1.7672	0.00282607
TNNC1	troponin C1, slow skeletal and cardiac type	0.28932	0.717122	1.30983	0.999893		0.316919	0.734942	1.767	0.0268419
CLYBL-AS2	CLYBL antisense RNA 2	1.83698	1.38881	0.793589	0.282848		0.972531	1.73534	1.76643	0.00404818
ZNF280B	zinc finger protein 280B	0.275352	0.316809	1.02927	0.905335		0.157894	0.341007	1.7652	0.00115938
NMB	neuromedin B	0.809646	2.00707	1.64982	0.00844662		0.793406	1.85697	1.76453	0.00218975
SH3PXD2A-AS1	SH3PXD2A antisense RNA 1	0.354182	0.773018	1.20426	0.415098		0.156603	0.477842	1.76398	0.0206299
MBD5	methyl-CpG binding domain protein 5	2.96407	4.49717	1.35587	0.000272432		2.34576	4.72479	1.76397	2.27616e-16
COPG2IT1	#N/A	0.723682	0.589726	0.811359	0.361358		0.348566	0.684741	1.76315	0.00153949
EFCAB14-AS1	EFCAB14 antisense RNA 1	13.5575	18.1785	1.2009	0.224863		9.93621	18.8973	1.76275	1.24004e-10
CELF3	CUGBP, Elav-like family member 3	0.674999	0.779344	0.981974	0.944474		0.364857	0.737386	1.76264	0.000120339
IQCK	IQ motif containing K	2.31229	3.25731	1.13574	0.49501		1.75892	3.29418	1.76079	1.67497e-10
CAMTA2	calmodulin binding transcription activator 2	5.0524	7.06455	1.33021	0.00692409		3.98462	7.75197	1.7605	8.11268e-20
ELK3	ELK3, ETS transcription factor	4.29323	5.19906	1.07817	0.647086		2.95977	5.99735	1.7601	3.13006e-12
R3HDM1	R3H domain containing 1	4.47674	6.76044	1.20204	0.269593		3.1509	6.57163	1.76	8.23893e-10
HHLA3	HERV-H LTR-associating 3	0.493199	0.904403	1.45145	0.0603635		0.352323	0.86967	1.75964	0.00581998
COL11A2	collagen type XI alpha 2	0.252549	0.532936	1.47537	0.0554166		0.208146	0.444294	1.75918	0.000212038
SLCO4A1	solute carrier organic anion transporter family member 4A1	1.39948	3.32724	1.54701	0.024499		1.49833	3.18417	1.75852	0.000294601
ZNF362	zinc finger protein 362	4.30395	5.6329	1.13441	0.439267		3.03954	5.76088	1.75852	5.50113e-11
LINC01132	long intergenic non-protein coding RNA 1132	0.176805	0.230894	1.07151	0.794952		0.120205	0.286154	1.75843	0.00833963
ALOX12B	arachidonate 12-lipoxygenase, 12R type	0.387205	0.379427	0.965106	0.902316		0.166826	0.356415	1.75771	0.010834
CLDN9	claudin 9	0.15888	0.364937	1.61383	0.0154731		0.185044	0.332634	1.75753	0.0121982
ABO	ABO blood group (transferase A, alpha 1-3-N-acetylgalactosaminyltransferase; transferase B, alpha 1-3-galactosyltransferase)	4.25957	6.8491	1.28765	0.170267		3.01433	6.20099	1.75695	7.38551e-05
CHRNA5	cholinergic receptor nicotinic alpha 5 subunit	2.72432	3.60285	1.14801	0.498966		1.71418	3.3065	1.75655	1.0651e-05
DACH1	dachshund family transcription factor 1	5.76631	8.62272	1.20238	0.0932209		3.96492	7.52615	1.75586	1.41462e-11
RP11-279F6.1	#N/A	1.93716	2.01383	0.918909	0.746602		0.910095	1.75568	1.75582	0.00222135
BRD7P3	#N/A	0.283031	0.242545	0.877432	0.588707		0.101202	0.334853	1.75572	0.0132199
PSME3	proteasome activator subunit 3	9.89323	19.1978	1.64193	7.37402e-06		8.84164	17.5962	1.75507	3.42466e-15
COBLL1	cordon-bleu WH2 repeat protein like 1	6.50008	8.08252	1.09544	0.527919		4.82069	9.00792	1.75493	1.17133e-14
TM4SF1-AS1	TM4SF1 antisense RNA 1	0.0861648	0.320889	1.2458	0.999893		0.140408	0.379461	1.75466	0.0280873
PPM1H	protein phosphatase, Mg2+/Mn2+ dependent 1H	4.43814	6.70251	1.30031	0.0521493		3.4326	7.11539	1.75429	1.49485e-10
APBB2	amyloid beta precursor protein binding family B member 2	4.6013	6.89079	1.23707	0.0899479		3.53901	7.05373	1.75424	6.92228e-15
CNOT4	CCR4-NOT transcription complex subunit 4	4.71736	6.44374	1.26225	0.0201409		3.46539	6.81128	1.75328	1.30278e-15
LARS2-AS1	LARS2 antisense RNA 1	0.2135	0.240808	1.01979	0.999893		0.112796	0.286867	1.75307	0.0183472
SMPX	small muscle protein, X-linked	0.050169	0.17894	1.22279	0.999893		0.0392072	0.204977	1.75287	0.0265403
SLC9C1	solute carrier family 9 member C1	0.584752	0.660372	1.0115	0.970052		0.390233	0.755054	1.75257	8.91264e-05
NACC1	nucleus accumbens associated 1	6.41144	11.0167	1.58176	1.07175e-05		5.79098	11.3395	1.75236	1.1418e-11
EYA2	EYA transcriptional coactivator and phosphatase 2	0.293074	0.276299	0.971197	0.919932		0.179639	0.372103	1.75182	0.015101
MEF2D	myocyte enhancer factor 2D	5.46999	7.33977	1.25732	0.0584246		3.81642	7.81042	1.75161	1.08578e-13
SORBS2	sorbin and SH3 domain containing 2	2.06839	2.89801	1.08237	0.698617		1.34096	2.66234	1.75159	1.54082e-07
MDFI	MyoD family inhibitor	1.0674	1.66306	1.19313	0.458435		0.585206	1.38136	1.75134	0.00280731
DNASE2B	deoxyribonuclease II beta	0.101168	0.126712	1.03835	0.999893		0.0150635	0.137594	1.75112	0.0299913
PRICKLE4	prickle planar cell polarity protein 4	4.50109	6.52519	1.2793	0.115565		3.56712	6.88423	1.74905	4.02811e-08
SMG7	SMG7, nonsense mediated mRNA decay factor	9.05104	12.8323	1.17053	0.348301		6.64489	13.0126	1.74891	4.63647e-09
TIMP1	TIMP metallopeptidase inhibitor 1	28.8593	52.0628	1.37808	0.10802		18	39.2293	1.74866	6.40511e-07
NPDC1	neural proliferation, differentiation and control, 1	17.2335	21.1487	1.11718	0.587666		9.82766	18.5314	1.74854	1.01677e-06
PCDHB13	protocadherin beta 13	0.252621	0.363001	1.07965	0.774383		0.156719	0.409933	1.74838	0.0117581
ATP4A	ATPase H+/K+ transporting alpha subunit	0.391638	0.099882	0.767639	0.146342		0.0329291	0.107498	1.74828	0.032263
SYT5	synaptotagmin 5	0.378581	0.409229	0.9814	0.949855		0.246008	0.422288	1.7475	0.00847339
FANK1	fibronectin type III and ankyrin repeat domains 1	1.80935	2.50523	1.17244	0.335949		1.25611	2.36344	1.74735	8.43127e-05
SOCS3	suppressor of cytokine signaling 3	3.77999	4.19304	1.01151	0.970818		2.80575	12.9241	1.74709	0.0319597
RP11-426L16.8	#N/A	0.378992	0.687648	1.29948	0.243937		0.22939	0.533963	1.74702	0.0103327
MUC4	mucin 4, cell surface associated	0.214446	0.314274	1.23517	0.300522		0.14191	0.297832	1.74661	0.00357882
NCOA6	nuclear receptor coactivator 6	7.49054	9.03223	1.06516	0.725602		5.00516	10.2668	1.74631	1.6075e-11
ATF7IP2	activating transcription factor 7 interacting protein 2	4.65818	9.50026	1.43035	0.0261585		3.53877	7.71201	1.745	8.78057e-07
MKL2	MKL1/myocardin like 2	6.67099	8.85738	1.12541	0.422852		4.51998	9.48237	1.74457	3.43629e-09
C1orf127	chromosome 1 open reading frame 127	0.519232	0.476934	0.926895	0.759802		0.312407	0.596965	1.74405	0.00150701
KCNJ2	potassium voltage-gated channel subfamily J member 2	1.24535	2.07028	1.36811	0.0569399		0.833779	1.75739	1.74401	2.76299e-06
MTSS1	metastasis suppressor 1	3.51283	4.77911	1.16064	0.342716		2.47989	4.714	1.74352	1.51791e-12
SHC2	SHC adaptor protein 2	4.10604	5.42263	1.16321	0.431931		3.34604	5.83885	1.74264	1.27497e-05
WSCD2	WSC domain containing 2	0.1689	0.232251	1.133	0.61838		0.07724	0.257981	1.74179	0.0202271
HOXA1	homeobox A1	0.174823	0.478175	1.63835	0.0121878		0.174773	0.413372	1.74166	0.0103385
PSORS1C3	psoriasis susceptibility 1 candidate 3 (non-protein coding)	3.68223	8.23512	1.24148	0.281008		1.9881	3.08918	1.7416	0.000616195
FAM188B	family with sequence similarity 188 member B	1.73937	2.6383	1.29194	0.162678		1.55558	2.77083	1.74076	6.43126e-08
C21orf62	chromosome 21 open reading frame 62	0.186197	0.193562	0.955974	0.86478		0.118738	0.217847	1.74014	0.00919171
EHF	ETS homologous factor	48.4574	67.1623	1.13617	0.468377		34.3533	65.0321	1.73905	1.78106e-11
NHS	NHS actin remodeling regulator	1.01153	1.84196	1.34433	0.131049		0.868709	1.8072	1.73889	0.000180558
FBXW8	F-box and WD repeat domain containing 8	3.38886	4.58396	1.17251	0.281453		2.34484	4.48878	1.73792	1.59824e-13
TRIP6	thyroid hormone receptor interactor 6	6.41623	12.5489	1.40284	0.0837919		5.43472	11.4224	1.73786	5.24303e-05
SEMA4G	semaphorin 4G	11.1589	15.9184	1.38118	0.00226071		9.37457	17.8861	1.73777	2.24893e-11
KIAA0319	KIAA0319	0.0871907	0.0755511	0.856607	0.521548		0.0478843	0.0972992	1.73718	0.0142265
PAPPA2	pappalysin 2	0.10834	0.164679	1.12973	0.626433		0.0819776	0.212076	1.73662	0.0122174
ADAMTS9	ADAM metallopeptidase with thrombospondin type 1 motif 9	1.24606	1.95663	1.27092	0.269595		1.01635	2.42768	1.73659	0.0115261
DLEU7-AS1	DLEU7 antisense RNA 1	0.232328	0.270099	1.01927	0.948916		0.111092	0.445828	1.73616	0.0297279
CDC42EP1	CDC42 effector protein 1	15.2576	21.6484	1.25083	0.24437		12.294	22.4519	1.73613	1.34069e-12
SND1-IT1	SND1 intronic transcript 1	0.887278	1.16395	1.12762	0.575731		0.57007	1.30325	1.7358	0.00188382
HEYL	hes related family bHLH transcription factor with YRPW motif-like	0.634572	0.996619	1.37889	0.0654391		0.50862	1.07631	1.73526	1.43415e-06
HSF4	heat shock transcription factor 4	2.657	3.67008	1.22364	0.314365		1.54439	3.06285	1.73375	8.03655e-05
CCAT2	colon cancer associated transcript 2 (non-protein coding)	0.197637	0.25069	1.06447	0.999893		0.0779313	0.226992	1.73332	0.0309475
HIVEP3	human immunodeficiency virus type I enhancer binding protein 3	0.313698	0.386905	1.06606	0.806301		0.186039	0.395735	1.73279	1.24523e-06
AIRN	antisense of IGF2R non-protein coding RNA	0.158328	0.153199	0.955027	0.870766		0.0799264	0.182295	1.73249	0.00904449
ALKBH3-AS1	ALKBH3 antisense RNA 1	0.538183	0.512262	0.885539	0.611879		0.324774	0.645008	1.73241	0.0111967
REC8	REC8 meiotic recombination protein	3.61245	8.93359	1.49987	0.0492081		2.80206	7.4368	1.73185	0.0156681
PPP1R13L	protein phosphatase 1 regulatory subunit 13 like	1.66498	2.63746	1.29713	0.194414		1.31921	2.46546	1.73	3.33724e-05
PIK3R2	phosphoinositide-3-kinase regulatory subunit 2	13.1878	18.5056	1.34163	0.00156936		10.775	20.3147	1.7295	2.08012e-12
KIAA1217	KIAA1217	8.17216	9.94824	1.08915	0.629464		5.47297	11.041	1.72884	1.70352e-14
PGR	progesterone receptor	0.47824	0.445276	0.88969	0.646603		0.231146	0.495187	1.7284	0.000656205
GPR179	G protein-coupled receptor 179	0.123637	0.0999267	0.828469	0.413587		0.0473157	0.0925931	1.72806	0.0141366
TACC2	transforming acidic coiled-coil containing protein 2	6.59004	8.85996	1.17455	0.219758		4.66658	8.73517	1.72755	2.18619e-18
IGSF10	immunoglobulin superfamily member 10	0.624162	0.843521	1.0099	0.973921		0.345722	0.789868	1.72719	2.56647e-05
MT1A	metallothionein 1A	4.11769	8.68393	1.51448	0.0134774		7.85701	12.773	1.72711	5.90802e-05
SETD1B	SET domain containing 1B	3.1217	4.28917	1.24109	0.112639		2.21984	4.26141	1.72613	9.33265e-10
MXRA5	matrix remodeling associated 5	7.70143	8.02547	0.970849	0.888146		5.61179	12.524	1.72499	7.12552e-06
FOXJ2	forkhead box J2	3.34051	4.85289	1.31823	0.00740587		2.45473	5.13585	1.72466	1.71481e-11
MAB21L3	mab-21 like 3	0.18244	0.265273	1.09617	0.729029		0.126152	0.3479	1.72437	0.0124008
HNF1A-AS1	HNF1A antisense RNA 1	5.20734	6.58348	1.11047	0.595801		3.3144	6.39664	1.72402	7.2183e-06
FOXD2	forkhead box D2	0.381693	0.860895	1.55564	0.0172869		0.318952	0.762175	1.72299	0.00507345
C6orf132	chromosome 6 open reading frame 132	5.18403	8.25605	1.43956	0.00395236		4.66336	8.96365	1.72275	3.09756e-13
GPR19	G protein-coupled receptor 19	0.280272	0.248858	0.900668	0.686901		0.156034	0.324479	1.72246	0.0186066
LAMP3	lysosomal associated membrane protein 3	1.0372	1.44274	1.40871	0.0106613		0.75879	1.79625	1.72244	1.01564e-05
BGN	biglycan	2.18832	2.70151	1.08683	0.737275		1.48597	3.76312	1.722	1.13392e-06
ZNF618	zinc finger protein 618	1.37832	1.47311	0.948282	0.818072		0.944913	1.82191	1.72037	9.17816e-06
FAM169A	family with sequence similarity 169 member A	0.94377	1.51951	1.21502	0.344224		0.68658	1.32825	1.71966	2.55583e-06
OR7E91P	olfactory receptor family 7 subfamily E member 91 pseudogene	0.0186551	0.3461	1.51209	0.999893		0.0116058	0.129199	1.71906	0.0310276
PTPN14	protein tyrosine phosphatase, non-receptor type 14	1.54223	2.04674	1.06982	0.761802		1.03299	2.09323	1.71876	4.68564e-06
SYT4	synaptotagmin 4	0.787089	0.764425	0.895697	0.643738		0.441577	0.648542	1.71825	0.00353726
DUSP10	dual specificity phosphatase 10	1.60364	3.27289	1.36186	0.143152		1.47613	2.75925	1.71813	4.54882e-06
LINC00853	long intergenic non-protein coding RNA 853	0.245528	0.430273	1.21042	0.999893		0.118928	0.326915	1.71774	0.0388429
CNKSR1	connector enhancer of kinase suppressor of Ras 1	5.08844	8.66814	1.55878	0.000272432		4.68373	8.95755	1.71771	1.94246e-14
SNTB1	syntrophin beta 1	6.42487	7.18608	0.956803	0.867462		3.7617	7.25944	1.71711	3.17863e-06
LDHAL6A	lactate dehydrogenase A like 6A	0.454083	0.450167	0.971007	0.913		0.304832	0.566834	1.71655	0.00190774
CYR61	cysteine rich angiogenic inducer 61	1.97703	2.47151	1.08449	0.764392		1.11426	4.17512	1.71612	0.0406319
NHSL2	NHS like 2	0.680287	0.880966	1.10693	0.640529		0.45943	0.965206	1.71561	8.2109e-05
TIAL1	TIA1 cytotoxic granule-associated RNA binding protein-like 1	12.2537	20.001	1.45481	0.000156424		9.59011	18.2552	1.71561	1.79892e-10
GCK	glucokinase	0.182865	0.217307	1.03048	0.919143		0.0840966	0.180101	1.71517	0.0257816
KLK6	kallikrein related peptidase 6	0.10186	3.25459	1.30516	0.0868308		0.0670755	2.09929	1.71198	0.0215806
AFF2	AF4/FMR2 family member 2	0.0676871	0.0992179	1.24105	0.312418		0.0401668	0.0966132	1.71166	0.00604132
PYCR1	pyrroline-5-carboxylate reductase 1	7.92474	13.7779	1.39461	0.0652856		6.11222	11.2875	1.71158	6.33791e-05
MYADML2	myeloid-associated differentiation marker-like 2	0.180788	0.391113	1.47115	0.0659526		0.128144	0.31909	1.71148	0.0331184
VAC14	Vac14, PIKFYVE complex component	6.99217	11.3611	1.53193	2.37639e-06		5.95514	11.3061	1.71127	1.8764e-17
FRMD5	FERM domain containing 5	0.472009	0.699375	1.22413	0.318869		0.371944	0.731313	1.71124	0.00329793
SLC43A1	solute carrier family 43 member 1	6.10492	9.11374	1.24852	0.240264		5.29828	9.63691	1.71092	1.43119e-06
C8orf46	chromosome 8 open reading frame 46	0.0900904	0.0903986	1.00633	0.999893		0.0504366	0.102467	1.71087	0.0371822
PLCE1-AS1	PLCE1 antisense RNA 1	1.27426	1.57168	1.07189	0.780645		0.760828	1.86115	1.71043	0.00164478
TCTEX1D4	Tctex1 domain containing 4	1.01179	1.79512	1.21439	0.40817		0.808104	1.77321	1.71013	0.0139609
ESRP2	epithelial splicing regulatory protein 2	8.59566	13.461	1.34348	0.0516212		7.40353	13.1987	1.71001	2.99261e-11
CSNK1A1P1	casein kinase 1 alpha 1 pseudogene 1	0.468215	0.440566	0.934029	0.799985		0.356248	0.619392	1.70988	0.0164896
GSK3A	glycogen synthase kinase 3 alpha	10.7455	18.7648	1.72531	5.12062e-13		10.8194	19.9356	1.70927	1.22956e-15
NECTIN1	Nectin cell adhesion molecule 1	6.17268	10.4953	1.50743	0.000191768		4.9631	9.53011	1.70738	3.69951e-19
CCL26	C-C motif chemokine ligand 26	0.378889	0.85515	1.34381	0.999893		0.236717	0.857717	1.70707	0.0416405
LILRA1	leukocyte immunoglobulin like receptor A1	0.172724	0.285717	1.46383	0.0494504		0.125034	0.269073	1.70688	0.0179077
HOXA11-AS	HOXA11 antisense RNA	0	0.655642	1.05448	0.558767		0.00379525	0.129967	1.70683	0.0229439
LOC100996634	#N/A	0.365291	0.604241	1.31052	0.203682		0.249301	0.578215	1.70651	0.011188
SRGAP1	SLIT-ROBO Rho GTPase activating protein 1	2.34891	2.90436	1.05678	0.749982		1.7153	3.27839	1.70615	2.33148e-08
EFNA3	ephrin A3	0.839544	1.41131	1.47768	0.00787865		0.687556	1.3365	1.70534	0.000529387
LRFN4	leucine rich repeat and fibronectin type III domain containing 4	1.67846	4.68991	1.58932	0.0175612		1.60057	3.31063	1.70469	0.00229333
CLDN20	claudin 20	1.89539	1.78167	0.924873	0.745119		0.99758	1.97695	1.70455	0.000820069
DYX1C1	dyslexia susceptibility 1 candidate 1	0.238725	0.425426	1.27612	0.27912		0.194651	0.39845	1.70374	0.00842477
DUSP18	dual specificity phosphatase 18	4.26823	6.62655	1.34131	0.0387833		2.87682	5.97512	1.70334	1.24316e-05
GYG2	glycogenin 2	1.10038	1.01785	1.01603	0.944037		0.837541	1.51887	1.70314	0.000276573
ITGB8	integrin subunit beta 8	5.92119	9.09646	1.27327	0.123782		4.33238	8.28717	1.70263	6.18003e-10
AES	amino-terminal enhancer of split	68.6906	120.035	1.64873	1.24855e-20		66.0879	121.586	1.70259	1.11511e-17
NPTXR	neuronal pentraxin receptor	0.314407	0.384594	1.09053	0.738641		0.180811	0.405339	1.70241	0.0048316
FOS	Fos proto-oncogene, AP-1 transcription factor subunit	96.7166	77.2353	0.863754	0.546752		52.895	229.489	1.70236	0.0439921
AHCYL2	adenosylhomocysteinase like 2	25.5663	33.864	1.22738	0.125205		20.993	38.4693	1.70063	1.10324e-07
MT1F	metallothionein 1F	45.3235	74.1759	1.22641	0.318369		49.2623	78.3207	1.69984	2.68702e-06
SDC3	syndecan 3	4.96742	7.99789	1.42432	0.0205681		4.02492	8.04912	1.69976	4.34642e-11
MAGEA11	MAGE family member A11	0.00748275	0.0611335	1.09824	0.999893		0.00859052	0.915017	1.69974	0.0215361
RBP4	retinol binding protein 4	4.50485	5.69209	1.04849	0.848088		3.19168	5.12778	1.69967	0.00104678
SH3TC2	SH3 domain and tetratricopeptide repeats 2	0.0480197	0.243116	1.43712	0.0648448		0.0428064	0.0886554	1.69953	0.0019938
HOXB13	homeobox B13	0.00225879	0.932458	1.30074	0.0837919		0.0048172	0.627371	1.69935	0.0206503
TEAD1	TEA domain transcription factor 1	6.20003	9.99981	1.23597	0.174309		4.71904	9.33549	1.69869	5.58422e-08
STARD4-AS1	STARD4 antisense RNA 1	1.40146	1.73297	1.08178	0.620385		0.950029	1.80253	1.69809	7.9972e-07
TMEM189-UBE2V1	TMEM189-UBE2V1 readthrough	14.5604	25.2885	1.58448	3.42062e-08		12.683	24.2256	1.69784	1.89778e-20
SPATA2	spermatogenesis associated 2	3.55972	5.82683	1.52871	3.16584e-05		2.98593	5.67972	1.69704	1.66897e-14
AGT	angiotensinogen	1.44071	2.39728	1.34905	0.109538		1.13599	2.18842	1.69683	0.00153048
LINC00997	long intergenic non-protein coding RNA 997	0.974094	1.29422	1.06273	0.786307		0.665546	1.25043	1.69638	6.57753e-05
TGIF1	TGFB induced factor homeobox 1	8.09304	13.7717	1.4042	0.0340112		6.81266	12.9174	1.69618	1.69949e-05
STAC	SH3 and cysteine rich domain	0.0967155	0.0811628	0.924791	0.999893		0.022564	0.0884366	1.69585	0.0456852
MRPL4	mitochondrial ribosomal protein L4	6.82728	13.2303	1.71639	2.58026e-08		7.03205	13.0059	1.69489	7.82631e-08
KCNK17	potassium two pore domain channel subfamily K member 17	1.2236	1.28767	0.967451	0.907479		0.696117	1.46379	1.6948	0.00289418
TRPV4	transient receptor potential cation channel subfamily V member 4	0.277374	0.275685	0.971687	0.921549		0.145844	0.320572	1.69454	0.0145247
MT1B	metallothionein 1B	1.45241	4.48208	1.5162	0.0447741		0.567751	1.04658	1.69449	0.0464728
HOMEZ	homeobox and leucine zipper encoding	5.91373	8.63187	1.30579	0.0117492		4.75404	8.59401	1.6943	6.72312e-21
TLE2	transducin like enhancer of split 2	6.3725	8.00556	1.11599	0.583647		4.38889	8.30962	1.6923	7.05144e-06
IGFBP5	insulin like growth factor binding protein 5	15.0735	29.9237	1.43078	0.0475411		10.7387	24.7794	1.69189	0.000122428
LDHD	lactate dehydrogenase D	5.80905	5.70358	0.95254	0.842267		4.73824	8.8288	1.69165	0.000141847
KRT6B	keratin 6B	0.00400775	0.108381	1.18546	0.999893		0.0154571	0.163037	1.68992	0.0319894
PRH2	proline rich protein HaeIII subfamily 2	0.944581	0.858445	0.883731	0.52204		0.477412	0.95783	1.68982	3.44483e-05
DZIP1L	DAZ interacting zinc finger protein 1 like	1.67351	1.22943	0.828077	0.419833		0.847131	1.87578	1.68899	0.0004466
PRSS54	protease, serine 54	0.197161	0.348768	1.19285	0.458705		0.153615	0.359081	1.68888	0.0350966
COLGALT2	collagen beta(1-O)galactosyltransferase 2	0.498494	0.790832	1.14644	0.581304		0.221879	0.509179	1.68887	0.0145204
MOK	MOK protein kinase	1.33511	2.19077	1.38016	0.0846687		1.09776	2.04962	1.68885	0.000179405
TMEM75	transmembrane protein 75	0.323786	0.5803	1.23135	0.371907		0.242943	0.473297	1.68862	0.015742
BRPF3	bromodomain and PHD finger containing 3	7.01252	9.74928	1.27454	0.0179329		5.57148	10.2807	1.68826	6.50765e-19
INA	internexin neuronal intermediate filament protein alpha	0.18964	0.314682	1.17553	0.48574		0.115293	0.204964	1.68764	0.0351472
DLGAP4	DLG associated protein 4	3.40712	5.17933	1.27233	0.0846603		2.61207	5.21277	1.68764	1.86863e-15
IL20RA	interleukin 20 receptor subunit alpha	2.74348	3.95454	1.19273	0.3572		1.73762	3.37262	1.68746	2.34554e-06
COLCA2	colorectal cancer associated 2	3.9052	4.97548	1.13072	0.518264		2.84034	4.5733	1.68697	2.4109e-07
FAIM2	Fas apoptotic inhibitory molecule 2	0.261032	0.360424	1.09025	0.740927		0.156559	0.301999	1.68685	0.0139604
TLR5	toll like receptor 5	1.05241	1.86428	1.40959	0.0270018		0.785845	1.6516	1.68663	1.32668e-06
ERP27	endoplasmic reticulum protein 27	0.684212	0.779496	1.12046	0.637579		0.59327	1.467	1.68608	0.0134689
NAV3	neuron navigator 3	0.18976	0.249191	0.97177	0.921549		0.116103	0.18664	1.68536	0.00129552
ANGPTL3	angiopoietin like 3	0.743023	0.594768	0.823955	0.339064		0.453642	0.720015	1.68535	0.00378079
SSTR5-AS1	SSTR5 antisense RNA 1	0.715878	0.860278	1.16104	0.475748		0.485152	0.916267	1.68458	0.00367199
PROSER2	proline and serine rich 2	0.352742	0.622078	1.31003	0.209965		0.255042	0.563678	1.68326	0.00586861
CELF2-AS2	CELF2 antisense RNA 2	0.563786	0.799225	1.11379	0.672514		0.298192	0.66965	1.6821	0.0245834
DSG4	desmoglein 4	0.378044	0.567422	1.22605	0.329267		0.258401	0.521766	1.68164	0.00909232
LPCAT2	lysophosphatidylcholine acyltransferase 2	4.35566	7.42752	1.42613	0.00189319		3.49136	6.91943	1.68161	1.70747e-14
PTGS2	prostaglandin-endoperoxide synthase 2	1.25564	1.16995	0.993379	0.983229		0.754257	2.22809	1.68143	0.0443539
HP	haptoglobin	0.170407	0.189027	1.04174	0.999893		0.161396	0.351894	1.68124	0.0358086
CES1	carboxylesterase 1	12.4548	14.338	1.14017	0.410357		12.6942	25.2024	1.68067	0.00959182
TMEM233	transmembrane protein 233	0.140374	0.169743	1.07141	0.999893		0.0741168	0.241902	1.67959	0.0410919
KIAA1598	#N/A	5.64596	8.12517	1.23931	0.0761766		4.24688	8.27663	1.67942	1.71216e-12
OSCP1	organic solute carrier partner 1	1.31931	1.92577	1.17247	0.448685		1.15752	2.03448	1.67937	0.00014486
MDC1	mediator of DNA damage checkpoint 1	2.34578	2.99507	1.14066	0.393551		1.56116	3.14314	1.67897	1.16037e-07
ZSWIM4	zinc finger SWIM-type containing 4	0.74903	0.989039	1.1888	0.377416		0.556486	1.06921	1.67856	0.000728323
SAMD12	sterile alpha motif domain containing 12	4.22553	6.14827	1.18209	0.31881		2.94317	6.09069	1.67835	2.86366e-07
NR2F2	nuclear receptor subfamily 2 group F member 2	2.83592	3.61666	1.06952	0.739551		1.94848	3.63921	1.67735	8.58214e-08
LOXL1-AS1	LOXL1 antisense RNA 1	0.775402	1.25997	1.29736	0.203776		0.51982	0.953094	1.67715	0.000902227
NPIPB5	nuclear pore complex interacting protein family member B5	0.095087	0.173205	1.28101	0.270762		0.0603284	0.155826	1.67673	0.0341109
BTG2	BTG family member 2	40.6205	44.2095	1.07028	0.514624		30.1041	60.3876	1.67621	9.817e-05
PPP1R10	protein phosphatase 1 regulatory subunit 10	15.9277	21.9689	1.33653	0.0014768		12.6047	24.2255	1.67595	3.74363e-11
SLC45A3	solute carrier family 45 member 3	3.18071	5.28189	1.46735	0.014639		2.83863	5.2535	1.67569	2.02836e-06
NBR2	neighbor of BRCA1 gene 2 (non-protein coding)	2.17833	3.88096	1.46545	0.00300088		1.87369	3.21127	1.67562	1.85374e-06
CITED1	Cbp/p300 interacting transactivator with Glu/Asp rich carboxy-terminal domain 1	0.170828	0.411181	1.40523	0.114099		0.271904	0.483848	1.67516	0.0177744
LOC145474	#N/A	0.720998	0.764668	0.964949	0.897669		0.373866	0.81465	1.67444	0.0042551
MIPOL1	mirror-image polydactyly 1	1.60378	2.58336	1.24938	0.24336		1.09376	1.94397	1.67385	3.15237e-05
RP11-14D22.5	#N/A	0.231492	0.234036	0.982371	0.952581		0.162685	0.355575	1.67316	0.0187175
DUSP4	dual specificity phosphatase 4	1.27499	4.77175	1.42113	0.093667		1.14586	3.00138	1.67263	0.0218851
RGS4	regulator of G-protein signaling 4	2.82822	2.67629	0.839728	0.271032		1.84689	2.86726	1.67164	0.000165672
TCF12	transcription factor 12	31.0841	48.6693	1.27539	0.095344		25.1854	48.46	1.67148	6.37032e-09
NUTM1	NUT midline carcinoma family member 1	0.245889	0.364189	1.18951	0.452778		0.177764	0.421017	1.6711	0.0124898
TDO2	tryptophan 2,3-dioxygenase	4.95813	5.65295	1.08276	0.694866		3.32257	6.3937	1.67102	0.000706129
C10orf113	chromosome 10 open reading frame 113	0.069593	0.296842	1.24898	0.999893		0.0541704	0.292855	1.67049	0.0480478
C3orf20	chromosome 3 open reading frame 20	0.161307	0.147849	0.938223	0.819153		0.0784737	0.207121	1.67048	0.0284737
RNF38	ring finger protein 38	6.62813	10.3349	1.41215	2.3495e-05		5.26892	10.0655	1.67041	1.50335e-14
C2orf72	chromosome 2 open reading frame 72	9.58481	11.4825	1.16314	0.330868		7.8374	13.0248	1.67031	3.50627e-08
AHDC1	AT-hook DNA binding motif containing 1	0.970307	1.32161	1.22391	0.250591		0.641056	1.35322	1.67017	5.87286e-05
SLC26A5	solute carrier family 26 member 5	0.131597	0.158194	1.03496	0.999893		0.0970592	0.164972	1.6697	0.0424683
FRMPD1	FERM and PDZ domain containing 1	0.138274	0.198475	1.16064	0.535305		0.0474743	0.147814	1.66933	0.0378924
ZNF652	zinc finger protein 652	10.4887	13.6501	1.21012	0.00635586		7.98392	14.857	1.66882	3.84739e-21
SLC2A10	solute carrier family 2 member 10	2.2924	2.11654	0.911718	0.716055		1.29194	2.52618	1.66867	4.40276e-05
ASB9P1	ankyrin repeat and SOCS box containing 9 pseudogene 1	0.244243	0.345428	1.15449	0.55795		0.166388	0.347837	1.66857	0.0368582
GPR75	G protein-coupled receptor 75	0.768705	1.09497	1.21143	0.339064		0.570613	1.04003	1.66831	0.00194994
ENTPD2	ectonucleoside triphosphate diphosphohydrolase 2	2.14552	3.38336	1.3706	0.0716955		1.68223	3.18474	1.66784	9.06142e-05
KMT2C	lysine methyltransferase 2C	14.5	17.2659	1.0744	0.56683		9.9456	18.8584	1.66779	1.09038e-12
C17orf107	chromosome 17 open reading frame 107	1.39573	1.1169	0.858628	0.480197		0.680955	1.17076	1.66747	0.000516888
PODXL	podocalyxin like	6.09659	9.77549	1.38528	0.00661628		4.94302	9.57555	1.66729	2.31855e-09
MMP13	matrix metallopeptidase 13	0.96514	1.11413	0.998446	0.996018		0.525154	1.40472	1.66698	0.0415682
CPNE4	copine 4	0.132958	0.145772	0.98731	0.967438		0.0566162	0.121808	1.66684	0.0327388
IGFBPL1	insulin like growth factor binding protein like 1	0.473984	0.658998	1.19192	0.432856		0.401385	0.676117	1.66673	0.00207983
ZBED3-AS1	ZBED3 antisense RNA 1	0.691678	0.512907	0.854809	0.518195		0.327755	0.609863	1.66661	0.0254243
PRRT1	proline rich transmembrane protein 1	0.310959	0.440601	1.15743	0.536653		0.190572	0.378198	1.66646	0.0227991
NPPA	natriuretic peptide A	0.571044	0.529477	0.938159	0.818064		0.198554	0.524545	1.66641	0.0369212
ATP10B	ATPase phospholipid transporting 10B (putative)	23.3532	34.8165	1.3018	0.105553		18.9305	34.7855	1.66509	6.29348e-07
LTF	lactotransferrin	1.5161	1.46945	0.978492	0.93841		0.546039	1.33028	1.66421	0.00599502
FMO6P	flavin containing monooxygenase 6 pseudogene	0.647736	0.770605	0.987212	0.965552		0.334583	0.60681	1.66417	0.0224798
MKI67	marker of proliferation Ki-67	9.0357	11.6506	1.07336	0.742231		7.43813	15.1397	1.6632	1.05187e-05
CEACAM7	carcinoembryonic antigen related cell adhesion molecule 7	0.253782	0.356455	1.09854	0.721103		0.154168	0.459347	1.66263	0.0448262
GJB7	gap junction protein beta 7	0.22755	0.235253	1.03496	0.904415		0.0786362	0.249293	1.66246	0.0489449
SMCR5	Smith-Magenis syndrome chromosome region, candidate 5 (non-protein coding)	0.244224	0.36305	1.11044	0.686352		0.195435	0.402069	1.66235	0.00884746
ASXL2	additional sex combs like 2, transcriptional regulator	8.46984	10.9458	1.14098	0.360526		6.01044	11.7549	1.66114	2.04407e-10
SLC27A1	solute carrier family 27 member 1	2.12429	2.63261	1.13242	0.560154		1.41798	2.66118	1.66021	7.32496e-06
PRRC2A	proline rich coiled-coil 2A	14.2259	20.7974	1.31905	0.0532897		10.9044	20.809	1.65995	8.53023e-15
FSBP	fibrinogen silencer binding protein	1.74496	2.48688	1.14692	0.482464		1.2352	2.31071	1.6598	0.000264781
RP11-231I16.1	0	0.716984	0.827706	1.01035	0.965112		0.412282	0.768493	1.65961	0.000437855
GPC3	glypican 3	0.624516	0.735619	1.05955	0.827362		0.408146	0.952669	1.65944	0.0014226
DROSHA	drosha ribonuclease III	8.14613	10.7952	1.11981	0.417633		5.41895	10.2348	1.65896	2.89411e-11
LOC100128531	#N/A	1.40169	1.56467	0.999193	0.99768		1.01674	1.95831	1.65843	0.00515773
RBMS2	RNA binding motif single stranded interacting protein 2	3.64416	5.69445	1.30201	0.05742		2.88362	5.45523	1.65825	2.45602e-08
MSMB	microseminoprotein, beta-	20.5496	15.0325	0.947628	0.834003		6.27475	15.8633	1.6582	0.0251613
EFCAB6	EF-hand calcium binding domain 6	0.443298	0.46896	0.917132	0.716678		0.253646	0.531282	1.65786	0.00129965
SPRY3	sprouty RTK signaling antagonist 3	0.36699	0.415969	1.03947	0.842494		0.239859	0.448282	1.65783	6.96268e-06
LDOC1	leucine zipper, down-regulated in cancer 1	0.332299	0.381836	1.06565	0.819194		0.185425	0.404866	1.65729	0.0347258
PLEKHS1	pleckstrin homology domain containing S1	9.04261	12.7233	1.07651	0.694692		6.83454	14.2243	1.65724	2.28503e-05
PTCHD2	#N/A	0.0936949	0.108147	0.969139	0.914902		0.0659689	0.12121	1.65701	0.0388069
LHFPL3-AS1	LHFPL3 antisense RNA 1	0.309713	0.245147	0.873414	0.583597		0.264036	0.464487	1.657	0.014388
SOX9-AS1	SOX9 antisense RNA 1	0.282852	0.344733	1.11803	0.625198		0.171733	0.329869	1.65697	0.00843606
GMPR	guanosine monophosphate reductase	1.67335	2.67158	1.2366	0.323006		1.07318	2.45533	1.65685	0.00471948
C1QTNF1	C1q and tumor necrosis factor related protein 1	1.7083	2.55353	1.23392	0.271196		1.38055	2.95263	1.65671	0.00224867
ZFPM2	zinc finger protein, FOG family member 2	0.437662	0.489273	0.974595	0.929093		0.240633	0.505633	1.65572	0.000564819
HIPK2	homeodomain interacting protein kinase 2	15.754	16.0322	0.937542	0.665535		10.4371	18.6354	1.65566	3.80748e-13
CLC	Charcot-Leyden crystal galectin	6.86864	11.4611	1.39425	0.0471411		5.61889	12.6295	1.65548	3.49392e-05
NTF3	neurotrophin 3	1.51832	2.09977	1.15301	0.49036		1.16285	1.98666	1.65491	0.0024464
ZSCAN12P1	zinc finger and SCAN domain containing 12 pseudogene 1	0.669819	1.09037	1.22908	0.346238		0.556695	1.12888	1.65486	0.00249251
FKTN	fukutin	4.38553	6.93627	1.29387	0.0490665		3.55161	6.6281	1.65384	2.27325e-08
CACNB4	calcium voltage-gated channel auxiliary subunit beta 4	0.221345	0.284774	1.06808	0.813563		0.116973	0.242163	1.65374	0.00538748
ATP6V1E2	ATPase H+ transporting V1 subunit E2	0.43356	0.567947	1.14584	0.526489		0.289597	0.667857	1.65359	0.00562746
CREB3L4	cAMP responsive element binding protein 3 like 4	10.2836	13.2479	1.12188	0.61833		6.83253	12.6676	1.65324	6.60704e-06
TPP1	tripeptidyl peptidase 1	11.7126	16.517	1.32478	0.0222521		9.68178	18.2772	1.65309	7.24613e-07
APLP1	amyloid beta precursor like protein 1	0.663487	0.772976	0.999183	0.99768		0.382154	0.779879	1.65295	0.0184753
GNAO1	G protein subunit alpha o1	0.646579	0.861066	1.12294	0.586614		0.447228	0.821185	1.6527	1.69239e-06
REG1P	#N/A	0.154114	0.165734	1.03711	0.898879		0.109634	0.194029	1.65228	0.0493219
EDARADD	EDAR-associated death domain	0.773132	0.78337	0.964138	0.880147		0.447757	0.79854	1.65223	0.00144205
ZKSCAN8	zinc finger with KRAB and SCAN domains 8	5.41875	6.80279	1.10213	0.406509		3.78042	6.94464	1.65177	5.421e-09
CDKL5	cyclin dependent kinase like 5	2.25545	2.57993	1.01528	0.925041		1.5465	2.89408	1.65078	1.16499e-07
TTR	transthyretin	8.06185	8.49553	0.952387	0.848445		3.40083	8.23346	1.65069	0.0481127
CDKL2	cyclin dependent kinase like 2	0.0941029	0.0832181	0.868896	0.999893		0.0472216	0.103755	1.65068	0.03683
CLU	clusterin	52.9132	58.5616	1.00758	0.976998		35.4816	62.2793	1.65031	0.000241217
EGFL6	EGF like domain multiple 6	0.0565046	0.199803	1.54183	0.999893		0.0983217	0.228209	1.64966	0.0348715
ANXA3	annexin A3	18.5249	34.9201	1.33717	0.143751		15.3151	30.8333	1.64935	0.000103597
ZNF70	zinc finger protein 70	2.35718	2.88621	1.09671	0.501247		1.45573	2.75025	1.64934	6.94523e-09
RGL3	ral guanine nucleotide dissociation stimulator like 3	1.11046	0.852483	0.860495	0.540276		0.520065	1.00811	1.64906	0.00755465
C2CD3	C2 calcium dependent domain containing 3	3.53163	4.96387	1.20299	0.137831		2.60324	4.9401	1.64874	1.43103e-09
NAV2	neuron navigator 2	2.46565	2.81543	1.03793	0.834009		1.48945	3.12249	1.64847	6.72891e-06
PALM2	paralemmin 2	0.40577	0.535937	1.07405	0.764713		0.340229	0.607689	1.64784	2.63898e-05
SETBP1	SET binding protein 1	2.53598	2.71145	0.952675	0.845634		1.4315	2.82312	1.64734	5.20017e-09
UBQLN4	ubiquilin 4	3.90284	5.94709	1.3297	0.0509413		2.9391	5.4424	1.647	1.98427e-10
QSER1	glutamine and serine rich 1	6.74698	9.14056	1.13208	0.352992		4.94836	8.85314	1.64669	4.18294e-10
RAD54B	RAD54 homolog B (S. cerevisiae)	1.85706	2.89941	1.2259	0.26917		1.38161	2.60042	1.64626	0.000230891
HES2	hes family bHLH transcription factor 2	0.246283	0.461975	1.43547	0.0742681		0.266496	0.558269	1.64616	0.0110983
POU5F1	POU class 5 homeobox 1	0.782064	1.05479	1.08263	0.729506		0.632912	1.18599	1.64546	0.000459419
TPH1	tryptophan hydroxylase 1	11.5267	18.9586	1.19318	0.375063		8.16032	15.5335	1.64512	0.000364965
NR4A3	nuclear receptor subfamily 4 group A member 3	0.229147	0.388935	1.24456	0.339538		0.13668	0.438308	1.64485	0.0386993
DAB2IP	DAB2 interacting protein	10.9379	16.6449	1.40934	0.00114571		9.52402	17.4864	1.64462	2.14725e-09
SPINK1	serine peptidase inhibitor, Kazal type 1	316.483	525.947	1.40647	0.0388951		326.471	483.245	1.6445	4.76286e-07
CACNA1A	calcium voltage-gated channel subunit alpha1 A	1.02203	0.981602	0.855504	0.410032		0.516617	0.915572	1.6444	0.000605015
AZGP1	alpha-2-glycoprotein 1, zinc-binding	25.2976	45.1028	1.51856	1.08605e-06		22.3806	37.6885	1.64374	1.67475e-05
ATXN2	ataxin 2	7.48248	9.29452	1.08845	0.575857		5.37273	9.94293	1.6433	1.17269e-11
MOB3A	MOB kinase activator 3A	4.9151	7.15654	1.43354	2.41133e-05		3.92241	7.21489	1.64312	1.66897e-14
MT1L	metallothionein 1L (gene/pseudogene)	3.40993	7.19701	1.49683	0.0390486		2.94719	5.22938	1.64132	0.00276888
CRTC2	CREB regulated transcription coactivator 2	3.49605	5.74564	1.50369	0.00184818		2.96323	5.60524	1.64096	8.20492e-10
FZD3	frizzled class receptor 3	1.86328	2.77991	1.21797	0.104229		1.33057	2.355	1.64089	6.23162e-10
C1orf180	#N/A	0.432129	0.80288	1.43216	0.0435382		0.393234	0.728156	1.64023	0.0145647
RAB27B	RAB27B, member RAS oncogene family	7.70595	9.56608	1.1075	0.638299		6.63155	11.851	1.64008	4.83688e-09
UQCRBP1	ubiquinol-cytochrome c reductase binding protein pseudogene 1	0.620801	0.788604	1.12033	0.64999		0.301804	0.81408	1.63992	0.0338202
ISG20L2	interferon stimulated exonuclease gene 20 like 2	8.50086	14.4544	1.5393	1.17139e-05		7.3325	13.336	1.63961	3.90425e-13
ARG1	arginase 1	0.626951	0.61103	0.948781	0.850252		0.381747	0.760596	1.63926	0.00958831
PRIMA1	proline rich membrane anchor 1	0.648882	1.17584	1.28387	0.237528		0.365576	0.876612	1.63903	0.00192462
RP11-346I3.4	#N/A	0.221238	0.218895	0.932799	0.782146		0.13322	0.277218	1.63843	0.0134944
SLC7A8	solute carrier family 7 member 8	10.2231	11.7077	1.07286	0.641727		7.48492	13.5199	1.63824	4.48283e-13
SAP130	Sin3A associated protein 130	5.10097	7.08697	1.23706	0.0667824		3.93973	7.3375	1.63824	6.2512e-13
BIK	BCL2 interacting killer	3.80953	8.42946	1.63383	0.00211932		3.3923	6.45672	1.63821	0.000280737
NIPAL2	NIPA like domain containing 2	8.94107	12.6722	1.28023	0.0562716		7.55981	13.9445	1.63793	7.06808e-11
PATZ1	POZ/BTB and AT hook containing zinc finger 1	4.29666	6.77473	1.40415	0.000187753		3.41056	6.39988	1.63678	4.55047e-08
AC093391.2	#N/A	1.63656	2.89999	1.45086	0.0308819		1.52932	2.52432	1.63652	0.000572717
PIAS3	protein inhibitor of activated STAT 3	3.25878	4.57363	1.27563	0.0606261		2.39196	4.47181	1.63539	6.4427e-09
EHD2	EH domain containing 2	2.63584	3.07977	1.04421	0.86379		1.81108	3.6237	1.63538	3.07893e-07
DYNLRB1	dynein light chain roadblock-type 1	32.5342	51.7496	1.45768	0.000251356		31.1522	59.6538	1.63523	1.10302e-07
LOC100506688	#N/A	0.181734	0.192481	0.944872	0.83899		0.0935266	0.18442	1.63517	0.0344737
FMN2	formin 2	0.131004	0.18072	1.11455	0.655895		0.0874578	0.133074	1.63497	0.0235676
MAP3K6	mitogen-activated protein kinase kinase kinase 6	1.74688	2.74987	1.34204	0.0442752		1.30359	2.68667	1.63448	0.000638207
ETV5	ETS variant 5	3.01011	3.74455	1.10075	0.689679		2.2136	3.88417	1.63445	1.40704e-05
ZNF280C	zinc finger protein 280C	1.52979	2.30422	1.28051	0.0642725		1.24013	2.33505	1.63404	1.75232e-07
NETO2	neuropilin and tolloid like 2	1.1768	4.54786	1.48919	0.0516539		0.985289	2.24744	1.63325	0.038602
ZNF585B	zinc finger protein 585B	2.47862	3.44257	1.2991	0.000596799		1.95157	3.62116	1.6332	1.85494e-10
NFIX	nuclear factor I X	5.0708	7.61798	1.2697	0.142292		4.01448	7.19559	1.63276	2.99583e-08
MMP7	matrix metallopeptidase 7	1.0523	8.21076	1.57434	0.0133922		0.258175	6.57009	1.63259	0.0346115
GFRA3	GDNF family receptor alpha 3	1.50007	1.55876	0.948407	0.821184		0.923682	1.86499	1.63251	0.010661
POLR2A	polymerase (RNA) II subunit A	14.9114	17.1706	0.996224	0.986007		10.4892	19.4231	1.63206	1.22803e-06
LINC01124	long intergenic non-protein coding RNA 1124	0.355345	0.57741	1.32152	0.182529		0.214811	0.462154	1.63163	0.0298835
TMEM63A	transmembrane protein 63A	15.4903	22.6658	1.20995	0.318378		10.668	19.1702	1.63161	1.02073e-06
FOSB	FosB proto-oncogene, AP-1 transcription factor subunit	1.56616	3.51607	1.08167	0.714548		0.266146	12.1912	1.63151	0.0332775
MFAP3L	microfibrillar associated protein 3 like	0.680439	0.676617	0.984811	0.94974		0.489662	1.02028	1.63032	0.000114603
AC093690.1	0	1.19331	1.02918	0.802333	0.296721		0.549024	1.05825	1.62993	0.00536443
LINC00643	long intergenic non-protein coding RNA 643	0.282252	0.283101	0.953923	0.853862		0.175621	0.304247	1.62962	0.0114233
IPW	#N/A	0.846082	0.798974	0.894109	0.593911		0.496081	0.888532	1.62844	0.0019172
C19orf55	#N/A	0.99459	1.59165	1.3022	0.179076		0.77582	1.43428	1.62826	0.000432005
PACS1	phosphofurin acidic cluster sorting protein 1	5.02221	6.24533	1.16476	0.248941		3.69693	7.2081	1.62805	8.23211e-09
SLC24A1	solute carrier family 24 member 1	2.23525	2.98335	1.18385	0.125688		1.73488	3.263	1.628	2.86e-11
ARHGEF10L	Rho guanine nucleotide exchange factor 10 like	12.2961	17.475	1.24924	0.123729		9.70667	16.631	1.62723	1.60508e-05
STK39	serine/threonine kinase 39	25.9926	47.6852	1.44505	0.0110731		23.5563	42.5633	1.62719	8.83929e-12
ZNF827	zinc finger protein 827	5.84624	6.73198	1.07118	0.627976		4.25008	7.69251	1.62712	5.92506e-15
UBALD1	UBA like domain containing 1	3.97972	5.26731	1.31198	0.0142687		3.19883	5.31565	1.62711	4.76901e-07
COL1A1	collagen type I alpha 1	10.1288	12.4408	1.07627	0.759802		6.49433	14.2428	1.62679	2.13373e-05
TCTN2	tectonic family member 2	1.93148	2.50305	1.20322	0.259216		1.26404	2.53855	1.62674	1.97617e-06
ZC4H2	zinc finger C4H2-type containing	2.52272	3.91901	1.43801	0.000101275		2.55482	4.47494	1.62654	7.22293e-08
C12orf36	#N/A	2.31477	4.65244	1.31021	0.180081		3.14016	4.41834	1.62528	0.0235451
SLC25A29	solute carrier family 25 member 29	4.98109	7.37864	1.28869	0.111246		3.82346	7.25827	1.62493	0.000406274
TTPA	alpha tocopherol transfer protein	0.206899	0.285986	1.13506	0.60945		0.289408	0.505486	1.62477	0.047331
ZC3HAV1L	zinc finger CCCH-type containing, antiviral 1 like	2.97363	4.75479	1.28732	0.153082		2.0512	3.96921	1.62444	0.000204118
TTBK1	tau tubulin kinase 1	0.649093	1.47026	1.57225	0.0206661		0.483414	1.04326	1.62316	0.0108194
SULT1C3	sulfotransferase family 1C member 3	1.95344	2.29603	1.20143	0.422361		2.86048	3.63532	1.62314	0.0154339
GP1BB	glycoprotein Ib platelet beta subunit	0.871594	0.717686	0.880611	0.613737		0.411206	0.71991	1.62313	0.036247
RP11-31F15.2	0	0.346196	0.448695	1.08295	0.742565		0.197985	0.402706	1.62308	0.032463
TMEM171	transmembrane protein 171	15.1839	25.3986	1.50316	0.000169603		16.6254	30.7715	1.6228	1.09257e-05
USP32P1	ubiquitin specific peptidase 32 pseudogene 1	1.11484	1.30968	0.973458	0.907692		0.482153	0.689412	1.62273	0.0112807
KDM6B	lysine demethylase 6B	3.54106	4.88512	1.18152	0.39675		2.68231	4.74343	1.62259	0.000107208
VANGL1	VANGL planar cell polarity protein 1	3.45447	5.53867	1.28601	0.093667		2.47096	4.82675	1.62252	1.3578e-07
TMEM104	transmembrane protein 104	1.65685	2.33047	1.3077	0.0104462		1.34042	2.36604	1.62247	1.32641e-09
THBS2	thrombospondin 2	1.28406	9.29281	1.47413	0.0457331		0.646511	1.87346	1.62232	0.0447714
LOC100506714	#N/A	2.25097	2.77567	1.11717	0.581552		1.85404	3.10412	1.62155	4.78152e-05
CHADL	chondroadherin like	0.937967	1.7814	1.41442	0.0562716		0.703443	1.31738	1.62103	0.00248983
TTC18	#N/A	0.973181	1.18271	0.997284	0.990783		0.710647	1.09615	1.6209	2.3278e-05
C9orf84	chromosome 9 open reading frame 84	0.518167	0.427777	0.80128	0.245307		0.243629	0.48702	1.62066	0.00349404
TM4SF1	transmembrane 4 L six family member 1	20.6021	47.8173	1.37586	0.142404		21.5724	41.1509	1.62004	0.000144638
POU2F1	POU class 2 homeobox 1	3.25584	4.03195	1.10164	0.365796		2.49811	4.56864	1.61974	1.35814e-11
SYTL1	synaptotagmin like 1	6.74949	8.16112	1.13368	0.541678		3.78377	7.27022	1.61769	7.13985e-05
SSH2	slingshot protein phosphatase 2	4.62598	6.53704	1.26359	0.0297857		3.19127	6.08536	1.61768	4.62992e-10
HIVEP1	human immunodeficiency virus type I enhancer binding protein 1	7.43078	8.74547	1.05741	0.725508		5.23767	9.57551	1.61753	2.05859e-12
TP53INP2	tumor protein p53 inducible nuclear protein 2	7.25522	10.0691	1.16462	0.360526		5.78475	9.6824	1.61714	1.47927e-06
BIN3-IT1	#N/A	0.607428	0.89804	1.19522	0.436858		0.453016	0.820027	1.61638	0.00803065
STOX2	storkhead box 2	2.17674	2.28351	0.9807	0.937001		1.14925	2.2301	1.61589	2.11578e-06
GSE1	Gse1 coiled-coil protein	7.47061	9.08426	1.09685	0.456439		5.44631	9.48073	1.61554	2.06744e-09
AFAP1-AS1	AFAP1 antisense RNA 1	0.804738	1.17456	1.15853	0.454871		0.587884	1.16592	1.61526	7.25288e-05
SLC18A1	solute carrier family 18 member A1	0.973577	1.74466	1.27866	0.179804		0.658863	1.04004	1.61522	0.00631485
RP5-833A20.1	#N/A	1.65004	1.67391	0.929359	0.788552		0.954901	2.0694	1.61496	0.022999
SUOX	sulfite oxidase	9.71565	13.2547	1.27982	0.00344408		7.73849	13.6362	1.61469	3.35805e-10
PHGDH	phosphoglycerate dehydrogenase	5.19734	6.33845	1.00209	0.994421		2.23944	3.96919	1.61438	0.000965643
PTPN12	protein tyrosine phosphatase, non-receptor type 12	12.4825	18.9106	1.2137	0.239707		8.53172	16.3371	1.6137	5.92431e-06
YLPM1	YLP motif containing 1	8.22836	9.76222	1.04215	0.819231		5.63451	10.1032	1.61243	2.90394e-10
LOC100506497	#N/A	0.408777	0.648952	1.17042	0.496806		0.33093	0.639235	1.61243	0.00878636
PPM1L	protein phosphatase, Mg2+/Mn2+ dependent 1L	2.82568	3.3498	1.05978	0.733894		1.83936	3.56568	1.61236	1.23648e-06
NRG4	neuregulin 4	0.840452	0.572799	0.772244	0.234043		0.316494	0.620038	1.61176	0.0111793
PACRG	PARK2 coregulated	0.590051	0.607698	0.948755	0.848607		0.507745	0.990482	1.61138	0.0030379
TGM3	transglutaminase 3	0.184897	0.329615	1.24938	0.324294		0.137982	0.358921	1.61109	0.0411952
TSPYL4	TSPY-like 4	3.06441	4.84232	1.34698	0.000982983		2.26309	4.06325	1.61101	5.92504e-11
LPAR2	lysophosphatidic acid receptor 2	4.50099	7.0675	1.29153	0.117351		3.3261	6.0451	1.61072	9.06983e-08
FAM98B	family with sequence similarity 98 member B	3.86332	5.20379	1.05116	0.823561		2.7091	4.88763	1.61023	3.48183e-05
SATL1	spermidine/spermine N1-acetyl transferase-like 1	0.821121	1.35054	1.42652	0.0180533		0.659007	1.24891	1.61006	0.00181561
ESRP1	epithelial splicing regulatory protein 1	25.4801	40.914	1.34763	0.00681717		22.9405	39.5951	1.60905	3.81694e-19
FGF18	fibroblast growth factor 18	0.606353	1.07463	1.48654	0.0291172		0.569025	1.09115	1.60905	0.00665585
CIRH1A	#N/A	4.95717	9.92541	1.44874	0.0258763		4.31154	8.03935	1.60838	0.00028572
DDAH1	dimethylarginine dimethylaminohydrolase 1	40.9589	64.8122	1.36609	0.0110923		36.2352	62.8465	1.60816	1.51961e-19
SYVN1	synoviolin 1	10.3348	14.4901	1.29731	0.0554678		7.7105	13.814	1.60801	1.18645e-09
LOC100505658	#N/A	1.30873	1.14529	0.825321	0.362634		0.806139	1.48916	1.60733	0.00484369
GALNTL6	polypeptide N-acetylgalactosaminyltransferase-like 6	0.175905	0.503446	1.53964	0.0354207		0.175009	0.311766	1.60684	0.0303908
OXA1L	OXA1L, mitochondrial inner membrane protein	49.9014	85.3664	1.61124	7.87461e-17		48.9415	82.089	1.60682	1.31227e-09
COPS7B	COP9 signalosome subunit 7B	3.91436	5.85157	1.40138	0.000553805		3.30665	5.84419	1.60673	8.73607e-10
CACNA1D	calcium voltage-gated channel subunit alpha1 D	3.07446	3.87175	1.08144	0.695695		2.08274	3.63035	1.60667	2.27997e-05
ABCC1	ATP binding cassette subfamily C member 1	5.12001	8.31579	1.27842	0.152506		3.68117	6.89597	1.60629	2.15487e-05
CELSR2	cadherin EGF LAG seven-pass G-type receptor 2	0.850925	1.04459	1.08487	0.650025		0.59081	1.0352	1.60525	0.000165365
PURA	purine rich element binding protein A	12.4675	16.2374	1.26231	0.0292949		9.83037	17.2104	1.60516	4.7822e-14
HYAL1	hyaluronoglucosaminidase 1	1.80862	2.93989	1.27156	0.246648		1.44151	2.81368	1.60469	0.00929017
CS	citrate synthase	32.6062	55.8804	1.54507	3.0223e-07		30.4722	56.1893	1.60452	6.41181e-11
ATXN2L	ataxin 2 like	9.69419	14.5707	1.35528	0.0269833		7.82117	13.9033	1.60395	8.00856e-10
PPP6C	protein phosphatase 6 catalytic subunit	14.3934	24.2167	1.60286	2.05624e-11		14.0665	24.2495	1.60334	2.73407e-15
DNAH7	dynein axonemal heavy chain 7	0.197958	0.255218	0.969304	0.906003		0.109248	0.238029	1.60315	0.00094405
PPP1R11	protein phosphatase 1 regulatory inhibitor subunit 11	32.3256	54.5401	1.62363	1.72962e-12		30.5517	53.5443	1.60275	9.61441e-19
RP5-1180C10.2	#N/A	1.52974	1.67506	1.05634	0.775851		0.87252	1.70807	1.60207	6.36629e-05
DNAH2	dynein axonemal heavy chain 2	0.0624915	0.131391	1.29581	0.250991		0.056237	0.104905	1.60207	0.0201547
MAK	male germ cell associated kinase	0.671534	0.603846	0.823026	0.333232		0.414174	0.718762	1.60199	0.00128249
LOC100506860	#N/A	3.56094	3.71814	0.934558	0.758263		2.0093	3.92714	1.60187	0.0059559
THBS1	thrombospondin 1	13.1641	16.917	1.09335	0.671086		9.99813	22	1.60167	0.000820069
CD99P1	CD99 molecule pseudogene 1	2.10261	3.19607	1.25938	0.0785353		1.63331	3.16818	1.60167	1.52021e-06
ITLN1	intelectin 1	244.553	430.647	1.34621	0.176107		181.192	409.936	1.60112	0.0011639
OAS3	2'-5'-oligoadenylate synthetase 3	5.4587	7.5285	1.27206	0.135568		3.51884	7.96734	1.60072	4.79244e-06
HK2	hexokinase 2	1.30204	1.96621	1.19286	0.344408		0.975271	1.92049	1.6001	0.00365018
TEX9	testis expressed 9	12.8081	13.9834	0.935921	0.687937		7.22874	11.4416	1.5999	5.74738e-09
CPM	carboxypeptidase M	1.8912	3.15562	1.22445	0.194388		1.49056	3.0047	1.59879	0.00175912
TP53	tumor protein p53	11.4237	20.4443	1.48188	0.00367305		10.045	17.8362	1.59815	1.28823e-06
SIGLEC17P	sialic acid binding Ig like lectin 17, pseudogene	0.875437	1.26242	1.31809	0.136244		0.677491	1.32996	1.59808	0.00155927
TULP3	tubby like protein 3	3.22204	5.0599	1.4201	0.00292785		2.74997	5.10707	1.59794	6.22307e-10
C5orf42	chromosome 5 open reading frame 42	3.21868	3.68758	1.00901	0.951249		2.30066	4.36016	1.59737	3.52804e-09
SUSD4	sushi domain containing 4	0.564495	0.613343	1.00944	0.97695		0.28834	0.511469	1.59719	0.01461
PRAF2	PRA1 domain family member 2	0.965168	1.31369	1.15779	0.503314		0.55932	1.12025	1.59686	0.0168196
PKD1L3	polycystin 1 like 3, transient receptor potential channel interacting	0.819922	1.22265	1.21081	0.337453		0.817201	1.42907	1.59683	0.00133801
BMPR2	bone morphogenetic protein receptor type 2	10.0041	12.9724	1.12246	0.348919		7.73543	14.146	1.5967	1.2149e-07
HOXA13	homeobox A13	0.00619991	2.63696	1.13623	0.999893		0	1.01689	1.59657	0.0354745
PNMA2	paraneoplastic Ma antigen 2	0.469911	0.559798	1.03574	0.862974		0.324084	0.55279	1.59649	0.0011012
ZNF391	zinc finger protein 391	0.718562	0.826881	1.06483	0.816699		0.51585	1.02093	1.59637	0.0122924
PTPN23	protein tyrosine phosphatase, non-receptor type 23	4.21258	5.80976	1.22448	0.183032		3.27172	5.60681	1.59545	1.4066e-08
CACNA1C	calcium voltage-gated channel subunit alpha1 C	0.658148	0.823674	1.11902	0.57774		0.445334	0.814962	1.59525	0.000143859
FNDC4	fibronectin type III domain containing 4	0.721909	1.14699	1.27532	0.260745		0.617106	1.36757	1.59457	0.00377831
TOR4A	torsin family 4 member A	7.90962	14.4029	1.529	0.00241392		8.48527	16.0018	1.59456	3.18842e-05
AGR2	anterior gradient 2, protein disulphide isomerase family member	740.53	1063.5	1.14335	0.591627		484.696	924.266	1.59399	7.12466e-05
HS3ST1	heparan sulfate-glucosamine 3-sulfotransferase 1	2.98347	7.34049	1.41569	0.095344		2.35162	5.11499	1.5934	0.00418819
SF3A2	splicing factor 3a subunit 2	9.30857	13.0681	1.32652	0.0304062		7.38607	12.8335	1.59315	2.07069e-09
C8orf37	chromosome 8 open reading frame 37	0.753829	0.844727	0.965112	0.872411		0.582309	0.976946	1.59236	0.00015874
FAM107A	family with sequence similarity 107 member A	1.13925	1.94447	1.36761	0.0622102		1.10543	2.07325	1.59218	0.000308114
DCP1A	decapping mRNA 1A	6.10176	9.07677	1.35254	0.00192827		5.11865	9.41432	1.59065	1.13143e-08
PLP2	proteolipid protein 2	36.4684	75.1398	1.65209	0.000242069		34.6094	67.781	1.59032	2.40449e-05
KMT2E	lysine methyltransferase 2E	20.5231	24.3483	1.09409	0.358768		14.6645	25.6395	1.59019	2.39226e-11
ZC3H12B	zinc finger CCCH-type containing 12B	0.943351	1.11666	1.03557	0.842894		0.626151	1.10101	1.58967	2.32546e-05
GRAMD2	GRAM domain containing 2	0.663439	0.791686	1.0179	0.936457		0.438237	1.08774	1.58912	0.0177744
LRRC31	leucine rich repeat containing 31	9.82843	13.3862	1.21427	0.188797		8.17194	12.0492	1.58868	0.000153343
RAD21-AS1	RAD21 antisense RNA 1	0.477819	0.837334	1.4662	0.0308819		0.38807	0.822166	1.58865	0.0124355
NCDN	neurochondrin	2.15772	2.46469	1.09135	0.657953		1.45004	2.53276	1.58856	0.000395832
MAP4	microtubule associated protein 4	13.0744	18.819	1.25926	0.0698061		10.7447	19.63	1.58854	6.99197e-10
C11orf30	#N/A	4.53855	5.75619	1.18484	0.105763		3.52059	6.39813	1.58849	8.40894e-14
KIAA1522	KIAA1522	16.2141	25.1071	1.44122	0.00132457		14.5584	25.6419	1.58832	2.67997e-08
LARGE-AS1	LARGE antisense RNA 1	0.616864	0.533858	0.88852	0.620703		0.36661	0.718615	1.58824	0.0130344
SLC35A4	solute carrier family 35 member A4	12.1546	18.2311	1.41403	5.8666e-05		10.0227	18.0322	1.58771	8.16067e-12
TMEM63C	transmembrane protein 63C	0.24617	0.354952	1.19212	0.418451		0.20758	0.360318	1.58738	0.00841298
SEZ6	seizure related 6 homolog	0.422914	0.438589	0.961772	0.877762		0.261191	0.486785	1.58694	0.00248453
ADAM32	ADAM metallopeptidase domain 32	0.379287	0.395613	1.038	0.89589		0.600884	1.11113	1.58669	0.00228504
CDK2AP1	cyclin dependent kinase 2 associated protein 1	14.596	23.9175	1.43392	0.00321953		12.1154	21.5852	1.58647	7.9322e-12
VANGL2	VANGL planar cell polarity protein 2	1.57436	2.3386	1.2327	0.232048		1.14476	2.12902	1.58602	0.000183054
INMT-FAM188B	INMT-FAM188B readthrough (NMD candidate)	1.88057	2.58998	1.23153	0.24463		1.68341	2.71016	1.58461	1.1634e-06
TMEM254	transmembrane protein 254	5.02165	7.80745	1.43529	0.000963065		5.19013	8.33206	1.58389	1.46644e-14
KCNK3	potassium two pore domain channel subfamily K member 3	1.02726	1.56003	1.30048	0.0788499		0.806768	1.29644	1.58212	0.000174658
RNF39	ring finger protein 39	5.40305	7.91691	1.33016	0.034983		4.56347	7.80405	1.58153	6.70834e-09
BBS1	Bardet-Biedl syndrome 1	4.43437	5.74577	1.20001	0.110135		3.48806	5.96086	1.58103	7.19546e-12
RP4-777D9.2	#N/A	1.14054	1.1239	0.926586	0.768447		0.721151	1.36511	1.58087	0.0125239
PRAC2	prostate cancer susceptibility candidate 2	0	0.0750249	1.0643	0.999893		0	0.212551	1.58077	0.0393931
MARK4	microtubule affinity regulating kinase 4	1.79495	2.26112	1.21895	0.0954311		1.40049	2.32192	1.58051	5.30732e-07
TIMP4	TIMP metallopeptidase inhibitor 4	0.957017	1.60428	1.28517	0.140645		0.705422	1.34095	1.58026	0.00854665
LINC00641	long intergenic non-protein coding RNA 641	2.48648	3.01514	1.10042	0.541591		1.72648	3.16577	1.58024	2.3154e-06
FAM71F2	family with sequence similarity 71 member F2	0.548031	0.604752	1.034	0.908997		0.30354	0.623997	1.57985	0.0301721
SPATA6L	spermatogenesis associated 6 like	2.49307	3.29849	1.11219	0.498966		1.47155	2.80161	1.57966	0.000158729
NCSTN	nicastrin	35.0752	48.7731	1.37797	0.00127733		30.8607	55.3375	1.57894	2.65723e-12
SIRPB1	signal regulatory protein beta 1	0.178669	0.337604	1.44651	0.0452587		0.165775	0.291299	1.57855	0.0113094
LINC00960	long intergenic non-protein coding RNA 960	0.417753	1.23243	1.38812	0.130155		0.411087	0.778687	1.57849	0.0210803
VAMP2	vesicle associated membrane protein 2	5.87983	9.10476	1.2983	0.0601518		4.69132	8.35417	1.57841	2.61736e-06
BEND3	BEN domain containing 3	1.83969	2.76425	1.24632	0.173479		1.4926	2.59853	1.57834	0.000233973
KCND1	potassium voltage-gated channel subfamily D member 1	0.229427	0.307966	1.11877	0.640529		0.157994	0.323479	1.57801	0.00820019
ZNF275	zinc finger protein 275	3.72454	4.36802	1.07424	0.598146		2.51368	4.47664	1.57791	2.5469e-11
ZMYM3	zinc finger MYM-type containing 3	3.18694	4.13268	1.1938	0.109538		2.50805	4.29197	1.57709	1.64421e-11
CCDC97	coiled-coil domain containing 97	3.61946	5.17296	1.34106	0.0111477		3.13914	5.50957	1.57685	1.6075e-11
APCDD1	adenomatosis polyposis coli down-regulated 1	2.24488	4.09942	1.29437	0.157586		1.74157	2.97784	1.57681	0.00464138
GSTM1	glutathione S-transferase mu 1	2.46136	2.53789	1.21459	0.394753		5.35011	6.5142	1.57612	0.00138287
GPR112	#N/A	2.85512	3.35268	1.07979	0.716457		2.05368	3.56398	1.57525	7.00844e-06
PSORS1C1	psoriasis susceptibility 1 candidate 1	1.27032	2.74029	1.57827	0.00843535		0.677938	1.11189	1.57451	0.0297303
C19orf45	chromosome 19 open reading frame 45	0.336114	0.474687	1.22297	0.373688		0.275064	0.556272	1.5743	0.0349926
OVGP1	oviductal glycoprotein 1	1.02213	1.75023	1.3494	0.115922		0.768753	1.41781	1.57427	0.00453911
SOS1	SOS Ras/Rac guanine nucleotide exchange factor 1	13.5242	16.0741	1.144	0.222878		10.2881	17.8242	1.57403	3.32213e-10
WDR72	WD repeat domain 72	3.12632	2.24505	0.852252	0.464137		2.1473	4.79992	1.57363	9.427e-05
MEGF11	multiple EGF like domains 11	0.806558	0.863767	0.970412	0.894736		0.478836	0.890786	1.57354	0.00185283
EPHB2	EPH receptor B2	23.8336	40.226	1.38109	0.0529382		20.4029	35.0073	1.57288	0.000589116
TMEM51-AS1	TMEM51 antisense RNA 1	1.69704	2.00908	1.09209	0.610514		1.26075	2.09652	1.57247	3.65316e-06
CASP2	caspase 2	4.84044	6.92227	1.27034	0.0349838		3.92041	6.91878	1.57198	1.24165e-10
ST5	suppression of tumorigenicity 5	9.10039	11.9428	1.22587	0.0499466		6.95996	11.9155	1.57194	1.24918e-11
NDNF	neuron-derived neurotrophic factor	2.05594	2.59753	1.02561	0.927003		1.10873	2.26522	1.5717	0.0160365
PLA2G10	phospholipase A2 group X	3.41066	4.79524	1.18304	0.408908		2.81481	5.01995	1.57149	0.00189168
XIST	X inactive specific transcript (non-protein coding)	33.4614	12.8795	0.546632	0.000434402		18.0567	35.845	1.57049	5.30606e-05
AAK1	AP2 associated kinase 1	3.4473	4.03021	1.13814	0.322593		2.49287	4.45958	1.57043	5.1471e-08
PRR5-ARHGAP8	PRR5-ARHGAP8 readthrough	6.41377	10.7416	1.34046	0.107177		6.29996	10.2301	1.56992	0.000611662
RAB6B	RAB6B, member RAS oncogene family	0.923702	1.15914	1.04922	0.827871		0.725728	1.25823	1.56975	1.70634e-05
ZBED3	zinc finger BED-type containing 3	1.81843	2.24886	1.05847	0.816699		1.32549	2.18903	1.56974	0.00378649
PPP2R5E	protein phosphatase 2 regulatory subunit B'epsilon	8.97013	13.4259	1.32303	0.0095915		7.10493	12.6163	1.56971	5.15553e-07
DCC	DCC netrin 1 receptor	0.0588337	0.046067	0.927478	0.783477		0.0334969	0.0757759	1.56958	0.0438743
CLUL1	clusterin like 1	0.274166	0.361999	1.07645	0.784095		0.154129	0.350073	1.56917	0.0405677
FAM86JP	family with sequence similarity 86 member J, pseudogene	0.401006	0.664036	1.26799	0.259155		0.35119	0.641943	1.56903	0.016665
PIGZ	phosphatidylinositol glycan anchor biosynthesis class Z	0.779751	0.734354	0.916424	0.679074		0.510629	0.79121	1.56893	0.00195279
OTUB2	OTU deubiquitinase, ubiquitin aldehyde binding 2	1.02393	1.65792	1.34764	0.08062		0.715779	1.38259	1.56797	0.00314186
ASRGL1	asparaginase like 1	3.64004	4.80775	1.16172	0.471622		2.33411	4.0122	1.56775	3.20894e-05
TRIM66	tripartite motif containing 66	1.92542	2.26337	1.03034	0.8688		1.31224	2.21493	1.56522	3.15135e-07
ZNF592	zinc finger protein 592	6.61837	8.86842	1.25615	0.0104771		5.16758	8.97985	1.56478	8.1919e-15
LSR	lipolysis stimulated lipoprotein receptor	23.7992	41.0935	1.57239	3.16584e-05		22.0587	39.1687	1.56429	2.95195e-08
CABIN1	calcineurin binding protein 1	10.0705	13.5363	1.23023	0.115447		7.72438	14.1572	1.56368	1.05377e-09
SRCAP	Snf2-related CREBBP activator protein	7.50875	8.46413	1.00473	0.98387		5.21617	9.33973	1.56267	1.76311e-08
PALMD	palmdelphin	2.51896	2.2457	0.8774	0.600857		1.23839	2.72105	1.56192	0.00158844
PRKAA2	protein kinase AMP-activated catalytic subunit alpha 2	0.360852	0.351909	0.933195	0.803463		0.222636	0.412462	1.56177	0.0116583
MEX3A	mex-3 RNA binding family member A	0.330054	0.551161	1.3589	0.0742676		0.253027	0.46367	1.56167	0.00917056
MAP6	microtubule associated protein 6	0.50032	0.473457	0.838871	0.413392		0.272663	0.440244	1.56113	0.0126282
SF3A1	splicing factor 3a subunit 1	14.9475	19.8971	1.16738	0.31168		11.2122	20.0533	1.56102	3.16188e-10
FBRS	fibrosin	7.6827	10.8931	1.33854	0.0268731		6.26388	10.7026	1.56061	3.81377e-09
NAT10	N-acetyltransferase 10	7.88087	13.8784	1.45776	0.00241392		6.61337	11.4241	1.56053	9.54115e-08
SRD5A3	steroid 5 alpha-reductase 3	3.15402	5.53289	1.467	0.0136747		3.13993	5.28287	1.56044	7.05144e-06
SYT17	synaptotagmin 17	1.36815	1.98927	1.28627	0.138893		0.805823	1.45066	1.56038	0.00476474
CKAP4	cytoskeleton-associated protein 4	18.545	23.4274	1.12765	0.482787		12.7022	21.4399	1.56034	2.3194e-06
LSM12	LSM12 homolog	0.95739	1.69671	1.47827	0.0072699		1.00561	1.57712	1.56022	0.000115534
ITGBL1	integrin subunit beta like 1	0.292105	0.316961	0.927889	0.757545		0.160675	0.2425	1.55954	0.0135286
SCXB	#N/A	1.18197	1.36202	1.03431	0.899322		0.935599	1.41965	1.55903	0.0286942
NQO1	NAD(P)H quinone dehydrogenase 1	69.5037	142.643	1.50671	0.00567478		59.2117	109.449	1.55887	0.000454735
TNFRSF19	tumor necrosis factor receptor superfamily member 19	1.24549	1.20448	0.894673	0.661966		0.585737	1.16737	1.55758	0.0060677
SDCBP2-AS1	SDCBP2 antisense RNA 1	2.5003	2.62582	0.976199	0.910269		1.6867	2.87239	1.55754	0.000268159
PLAGL1	PLAG1 like zinc finger 1	2.0987	2.25117	0.981058	0.936897		1.48223	2.4636	1.55752	1.67837e-05
TMTC2	transmembrane and tetratricopeptide repeat containing 2	4.67405	5.99998	1.07447	0.724572		3.15454	5.7744	1.55737	2.65899e-05
ONECUT2	one cut homeobox 2	20.6761	24.0691	1.03086	0.879796		15.6731	28.3883	1.55679	0.000123979
WASF1	WAS protein family member 1	0.309782	0.577495	1.47743	0.023073		0.28866	0.498024	1.55544	0.0109748
PROX2	prospero homeobox 2	0.572403	0.512359	0.870634	0.467089		0.372209	0.631219	1.55531	0.0104746
DNALI1	dynein axonemal light intermediate chain 1	1.93838	2.44261	1.12943	0.559386		1.30596	2.35337	1.55526	0.000977744
RNF24	ring finger protein 24	2.20825	4.33298	1.57204	0.000916312		1.74775	3.43037	1.55516	0.000171722
RPGRIP1L	RPGRIP1 like	1.11687	1.41164	1.02628	0.917684		0.806154	1.2482	1.55493	6.61222e-05
SCN8A	sodium voltage-gated channel alpha subunit 8	0.335588	0.283324	0.853256	0.478304		0.208284	0.381792	1.55484	0.00173117
UBAP2L	ubiquitin associated protein 2 like	12.4551	17.5986	1.23929	0.0798167		10.067	17.0387	1.55465	5.82976e-12
ANKRD13B	ankyrin repeat domain 13B	0.480199	0.873028	1.40397	0.0951615		0.376832	0.699815	1.55461	0.0206299
[truncated: 989 more rows]

## Sheet: BaseEndPolyp50%Purity
Gene Name	Description	RPKM_DrugNormBase	RPKM_DrugPolypEnd	DrugPolypEndBase_Fold	DrugPolypEndBase_FDR		RPKM_PlaceboNormBase	RPKM_PlaceboPolypEnd	PlaceboPolypEndBase_Fold	PlaceboPolypEndBase_FDR
[truncated: 2,734 more rows]
