# Supplementary material for: Chemoprevention with Cyclooxygenase and Epidermal Growth Factor Receptor Inhibitors in Familial Adenomatous Polyposis Patients: mRNA Signatures of Duodenal Neoplasia
Source: Oxford University Press journal article supplement (doi:10.1158/1940-6207.capr-17-0130), 2017-11-06
Supplement: 182746_2_supp_4285228_6wn635.xlsx [file 182746_2_supp_4285228_6wn635.xlsx]

## Sheet: mts.RHS-005Z
Gene	IonTorrent_DrugPolypReads	IonTorrent_PlaceboPolypReads	IonTorrent_Fold	IonTorrent_p-value		Illumina_DrugPolypReads	Illumina_PlaceboPolypReads	Illumina_Fold	Illumina_FDR
IL32	na	na	na	na		2144.5	1043	1.57541	0.0146255
IFNG	16.3333	5.83333	2.53019	0.224559		10.3333	5.66667	1.12291	1
THPO	5.66667	2.16667	2.45052	0.0931333		na	na	na	na
CXCL10	227.833	81.1667	2.35973	0.346313		105	40	1.19578	1
AICDA	2.5	1.33333	2.26358	0.423324		3.16667	1	1.05503	1
IFNK	6.66667	4.33333	1.9748	0.33434		45.3333	45	0.937081	0.89736
CD8A	822.167	439.167	1.86259	0.134033		464.833	231	1.35834	0.266431
IL1A	3.16667	1.66667	1.77875	0.155437		na	na	na	na
CXCL11	95.8333	49.8333	1.74646	0.266104		26.6667	19.1667	1.0995	1
XCL1	16	8.83333	1.73459	0.178966		22.5	10.1667	1.31809	1
ISG20	3141.83	1890.17	1.67091	0.0116536		799.333	414	1.52818	0.019312
FLT3	36.3333	22.5	1.66552	0.0571188		66.6667	39	1.29723	0.344071
CXCR6	231.167	137.667	1.64705	0.0249151		232.333	136.667	1.3142	0.313879
BTLA	163.333	102.167	1.62951	0.131495		134	69.5	1.34402	0.281159
CCR9	377.833	218	1.6249	0.085073		319	190.833	1.24461	0.498847
FCER2	54.8333	31.3333	1.60843	0.0857886		29.3333	17	1.1935	1
MSTN	12.1667	7.66667	1.60498	0.070758		8.83333	9.16667	0.935017	1
TBX21	60.5	36.8333	1.58107	0.0726763		41.8333	23.1667	1.27458	0.433866
IL12RB2	43.3333	26.8333	1.57747	0.190713		41.1667	30.1667	1.10077	0.83267
ADA	18790.5	12760.5	1.57497	0.0441676		7880.67	3920	1.50976	0.0519674
IL27	5	3.16667	1.5522	0.238922		na	na	na	na
CCL5	4833.33	2944.33	1.53011	0.213958		1099.33	658.167	1.28061	0.39392
CLEC4E	18.8333	15.5	1.52117	0.473069		5.66667	3.16667	1.06501	1
IL12A	21.1667	13.8333	1.49162	0.101181		10.8333	8.83333	1.04115	1
IRGM	5.66667	3.66667	1.49022	0.39104		3.83333	2	1.09059	1
LTA	24.1667	15.3333	1.49001	0.1097		8	5.83333	1.07092	1
UTS2	14.6667	11.3333	1.48236	0.530635		5	3.33333	1.02508	1
CD3G	598.667	389	1.47568	0.116255		124.5	77.8333	1.22859	0.529684
FIGF	23.1667	15.3333	1.46726	0.129235		17.6667	9	1.30347	1
TYMP	1194.67	823.833	1.45585	0.0142507		947.833	542	1.45526	0.0210879
IL5	2.66667	2	1.44571	0.243914		na	na	na	na
CD3E	1069	705.833	1.43657	0.103542		275.167	187.167	1.18093	0.626146
IL18R1	316.833	211	1.43385	0.0580932		268.833	174.833	1.25713	0.384871
BMP6	307.833	228.667	1.41806	0.134881		1498.33	1230.5	1.03959	0.938403
CD40	416.833	281.833	1.41466	0.108789		183.333	111.667	1.30956	0.314021
CCR5	233.5	160	1.39946	0.0643308		192.833	106	1.42625	0.114885
STAT4	365.667	256.667	1.39574	0.0795524		280.167	176	1.25423	0.42808
CD2	1129	777.5	1.39304	0.0844885		608	359	1.29658	0.34744
TNFRSF18	148.667	113.333	1.39057	0.0786561		78.3333	35.6667	1.46664	0.125315
ZBTB7B	2263.5	1733.5	1.38798	0.123389		3717.17	2625.5	1.2114	0.343785
IRF4	441.333	314	1.38618	0.140812		1589.17	1053	1.20073	0.575535
IL18RAP	102.167	71.1667	1.3844	0.0841473		97.8333	78.6667	1.06522	0.898958
PRF1	323.167	231.833	1.37425	0.0726152		139.5	83.6667	1.30509	0.336928
CSF2	6.5	4.5	1.3637	0.340545		na	na	na	na
TNFRSF4	302.167	225.167	1.36209	0.127029		50.3333	24.1667	1.36541	0.25687
CD7	1215.67	895	1.35636	0.141695		154.5	87.5	1.37315	0.20507
TNFSF14	158.833	113	1.35312	0.123899		97.1667	66.5	1.17871	0.644764
TNFRSF1A	5600.67	4300.67	1.34437	0.0218437		3186.5	2226.5	1.24083	0.266088
CSF3R	135.167	96.8333	1.34281	0.389354		85.8333	56	1.15626	0.711756
LCK	261.5	182.167	1.34262	0.123121		358.5	212.833	1.33208	0.258361
XCR1	109.833	82.5	1.33727	0.12932		13.8333	10.6667	1.06883	1
IFIH1	746	560.667	1.33451	0.031645		906.167	697	1.14414	0.658021
TNFRSF9	24.1667	19.6667	1.32659	0.239346		21.5	11.5	1.2424	1
CCL26	28.1667	20.1667	1.31849	0.574724		7.83333	7.33333	1.00022	1
IL6R	876	717	1.30684	0.194781		1323	952.167	1.13962	0.71434
VAV1	307	228	1.30531	0.0533707		242	175.5	1.15634	0.673963
NR4A3	46	35.8333	1.29903	0.5167		26.5	29.3333	0.931381	0.88873
IFNA1	0.666667	0.333333	1.29537	0.458409		na	na	na	na
IFNA21	0.333333	0	1.29537	0.458409		na	na	na	na
FCGR1A	2	1.33333	1.29355	0.424067		na	na	na	na
IL7R	2054.67	1576.17	1.29151	0.146319		1802.33	1207.5	1.1902	0.590225
CCR8	5.16667	4.16667	1.29145	0.43805		2.66667	4.5	0.870767	1
DPP4	6975.83	5641.83	1.29026	0.0281241		7843.33	5558.33	1.1951	0.482535
IFI30	8190	6091	1.28798	0.0787723		1587	1149.5	1.21095	0.293256
IL18	1050	868	1.28447	0.116987		506.5	365	1.15752	0.671194
CD1D	828.333	632.833	1.28209	0.0713203		363.833	240.667	1.28758	0.165311
RORA	277.5	214.167	1.28072	0.155531		647	525	1.06194	0.892127
CCL16	6.16667	5	1.27852	0.306368		na	na	na	na
GFI1	450	342.833	1.27485	0.0759691		279.167	206.333	1.15586	0.626376
CD86	316	243.667	1.27445	0.0209509		167	121.167	1.17068	0.545492
IL2RG	2929.17	2338	1.27191	0.0466862		874.333	637.167	1.16782	0.550011
IFNB1	0.666667	0	1.26656	0.245313		na	na	na	na
FASLG	124.167	95.6667	1.26423	0.25475		50.3333	30.1667	1.26432	0.44829
PPARA	1500.17	1239.83	1.25995	0.0815393		3375.5	2627.67	1.1212	0.653911
TAP1	3127.5	2353.5	1.25925	0.289201		1929.5	1313.67	1.21867	0.535744
TLR4	226.5	182.833	1.25757	0.0317427		529.833	448.167	1.03087	0.945512
CXCR3	200.667	155.5	1.25684	0.119774		61.1667	54.3333	1.0074	0.98889
GBP1	1442	1115	1.25602	0.111989		863.5	627.833	1.19193	0.505606
CD3D	1394.17	1041	1.25451	0.325673		249.333	134	1.3656	0.232678
TLR2	103.333	84.5	1.25357	0.128545		145.833	112.333	1.11599	0.735947
CD5	139.333	103.167	1.25343	0.30206		126	94.8333	1.11012	0.80957
IL12RB1	208.333	163.167	1.24351	0.152666		112.167	76.6667	1.21295	0.518629
TGFA	506.333	433.167	1.24314	0.213048		628.833	511	1.05953	0.8938
TICAM2	265.833	207.667	1.24017	0.0265515		159.5	141	1.01473	0.966179
LAG3	102.833	83	1.23951	0.121884		31.6667	20.3333	1.21035	1
IL22RA2	3.83333	3	1.23832	0.676051		na	na	na	na
CD70	11.5	9.16667	1.23646	0.374787		na	na	na	na
CSF1R	1679.67	1381.33	1.23391	0.129465		587.333	479.167	1.06835	0.877425
IL1R2	50	36.3333	1.23127	0.72814		21.8333	17	1.05101	1
IL25	2.66667	1.66667	1.23056	0.681544		na	na	na	na
CCR2	450	381.5	1.22792	0.258994		420.333	281.5	1.19094	0.596135
CXCR2	29.3333	22.8333	1.22744	0.643246		12.1667	12.3333	0.953098	1
MX2	365.833	303.167	1.22416	0.203345		380.667	269.833	1.18405	0.561314
CDKN1A	7818.67	6654.67	1.2236	0.189407		3708.17	2558	1.20096	0.520096
NR3C1	1436.33	1180.83	1.22325	0.0172117		2337.33	1934.83	1.07366	0.785237
IL2	34.3333	29	1.22308	0.317691		na	na	na	na
KNG1	2.33333	2	1.2219	0.531526		na	na	na	na
EBI3	95.6667	79	1.22022	0.238126		30	24.3333	1.06003	0.911323
HLA-DMA	4984	4084.83	1.2182	0.165536		1580.67	1114.5	1.17543	0.587403
MAP2K3	1671.83	1341.33	1.21813	0.163563		559.833	427.5	1.15775	0.607533
PPBP	4.5	3.66667	1.21585	0.53177		na	na	na	na
CD209	742.333	594.333	1.21581	0.0929805		208	175	1.04447	0.921659
IL2RA	104.333	86.3333	1.2152	0.244213		79.1667	52.1667	1.19565	0.596352
STAT2	1078	900	1.20921	0.0242935		2022.5	1705.33	1.05709	0.805905
IL2RB	441.333	360.667	1.20908	0.305258		177.667	170	0.94603	0.913311
CCR1	284	229.833	1.20433	0.139189		152.167	124.833	1.05643	0.906092
ISG15	786.5	611.667	1.20329	0.169392		283.5	173	1.28556	0.373988
C3AR1	285.5	235.667	1.20257	0.0902407		158	116.333	1.16074	0.596135
MX1	808.167	690.833	1.19852	0.137645		1447.33	1162.33	1.07577	0.825903
IRF1	856	689.833	1.19584	0.345416		2164	1581.5	1.16573	0.647888
TLR7	85.5	72.6667	1.19447	0.337862		131	102.667	1.08772	0.829109
CD74	74640.5	62458.5	1.18987	0.152856		30488.5	20933.5	1.22029	0.433266
HLA-DPA1	18858.2	15430.8	1.18679	0.382508		6997.83	4871.83	1.16822	0.664688
CHUK	1017	858.5	1.18415	0.0916179		898.667	677	1.15213	0.596135
PTGDR2	272.833	243.667	1.1837	0.352321		232.167	160.5	1.18133	0.601883
ITGA1	1004.33	859.167	1.17887	0.196458		1639.67	1400.5	1.03589	0.937491
TNF	96.6667	83.1667	1.1765	0.441989		51.8333	36.5	1.17737	0.652316
NFATC2	637.5	548	1.17316	0.177006		658.333	675.5	0.895418	0.703282
IL17B	9.83333	7.83333	1.17123	0.74319		na	na	na	na
CCL24	3578.5	3115.5	1.17109	0.2374		479.5	396.167	1.07259	0.856306
NFATC3	759.667	662.833	1.17076	0.0780169		1977.17	1801.83	0.983712	0.933251
CMKLR1	148.667	128.667	1.1707	0.345882		194.333	158.167	1.05853	0.894717
REL	676.667	577.167	1.16911	0.067201		309	300.833	0.928644	0.754564
IRAK1	1247.17	1043	1.16874	0.165474		2044.33	1567.5	1.16854	0.385262
IL16	836.833	695	1.16592	0.346314		772.833	617.333	1.07637	0.864953
BTK	309.5	256.333	1.16488	0.199072		202.167	151.333	1.14542	0.625645
ICOS	60.3333	48.5	1.16288	0.328814		40.8333	43.3333	0.898239	0.795884
NOS2	749.167	646.5	1.16219	0.747997		1189.33	1143.17	0.986234	0.979641
MAF	10532.2	8984	1.16092	0.144998		4796.33	3998	1.06263	0.862871
TNFSF8	53	45.8333	1.1583	0.546351		70.3333	52	1.12379	0.765068
IL1RL1	137	111.167	1.15706	0.549243		108.5	96.6667	1.00051	0.999345
BCL2	505.167	428.167	1.15684	0.277696		544.333	435	1.0937	0.781813
HLA-C	40617.2	34956.2	1.15575	0.701056		10344.8	9404.33	0.9979	0.995624
TOLLIP	1081.67	933.833	1.15499	0.0276462		694.167	482	1.27691	0.0828413
TIMP1	2877.5	2271.67	1.15492	0.609482		575.167	445.5	1.09469	0.842701
FLT3LG	320.333	262.833	1.15464	0.435169		88	72.3333	1.04773	0.933404
PTGER2	353.667	294.5	1.15423	0.405518		232.333	197.5	1.03614	0.942324
ICAM1	329.833	277.5	1.15238	0.311499		329.833	290	1.02371	0.963899
CXCL16	3294	2806.83	1.15107	0.0829611		899.167	759.333	1.07349	0.711756
STAT1	3880.17	3215.17	1.15099	0.308028		2821.33	2202.33	1.13587	0.674611
MICB	212.5	177.667	1.1506	0.467792		131.667	101.167	1.14714	0.647408
IFNA5	0.833333	1.16667	1.14842	0.769236		na	na	na	na
IL21R	39	30.8333	1.14808	0.369816		47.6667	36.5	1.09524	0.84513
IGF1	458.333	399	1.14518	0.165435		427.5	374	1.01312	0.973316
IL15	183	163	1.14378	0.185116		119.5	87.5	1.11941	0.785529
IL10RB	2525.17	2222.33	1.14342	0.0379115		1407.17	1075.67	1.14654	0.542574
MAP3K2	1434.33	1290.67	1.14171	0.187481		3052.17	2803.67	0.97785	0.954925
MAPK8	1142.33	1000.17	1.14024	0.0414195		936	791.333	1.04776	0.893313
IL11RA	397.333	345	1.13977	0.391275		178.667	131.833	1.17431	0.53818
IDO1	662.833	565	1.13938	0.383436		260	202.167	1.13456	0.647254
IFIT1	187.833	165.833	1.13823	0.507023		217.5	166.667	1.12583	0.759297
HLA-E	13472.2	11598.8	1.13763	0.279635		8898.5	7155.17	1.09083	0.805905
TLR8	40.6667	33.3333	1.13565	0.437048		70.6667	58.3333	1.04523	0.933475
CXCL12	1250.5	1078.67	1.13458	0.288519		682.167	550.333	1.06577	0.878261
LAT	287.5	237.167	1.13305	0.411981		131.5	97.6667	1.12742	0.760648
IGSF6	219.667	191.667	1.12922	0.477068		150.167	125	1.03932	0.944879
IL17RA	117.333	108.333	1.12832	0.600198		650	590.167	0.982056	0.966138
MAP3K1	796.333	694	1.12614	0.2224		1518	1422.5	0.958904	0.874418
TXLNA	728.333	637.167	1.12539	0.3786		1522.33	1349.83	1.02171	0.958485
TYK2	895.167	783	1.12471	0.270598		1237.83	1000.83	1.10046	0.677348
NFKB2	669.667	549.5	1.12462	0.456792		421	334	1.11128	0.774656
CD4	870.167	754.833	1.12452	0.0832368		473.667	382.5	1.08811	0.773715
RUNX3	701.167	597	1.12448	0.37859		202.333	164.667	1.06539	0.8938
IFNL1	10.5	9	1.12411	0.621549		na	na	na	na
KITLG	934.5	826	1.1226	0.0689725		867.5	796.333	0.968118	0.941154
TNFSF4	25.3333	21.3333	1.12106	0.640187		20.1667	15.3333	1.0814	1
ITGB2	818.333	716	1.11851	0.419855		594.333	456.333	1.10341	0.807026
JAK3	281.333	239.333	1.11819	0.530707		210.667	176	1.04016	0.948725
MYD88	2425.33	2171.33	1.1181	0.260601		352.667	372.667	0.87835	0.602293
IFNLR1	400.167	363.5	1.11696	0.268819		432.167	332.5	1.15527	0.545492
CD80	23	20.8333	1.11677	0.562009		26.1667	28.6667	0.880147	0.746454
TNFRSF10A	350.167	309	1.11554	0.456702		191.667	153.5	1.11687	0.703175
IRF8	1646.83	1395.5	1.115	0.408929		1168.67	896.5	1.15986	0.492532
JAK2	443.333	394.167	1.11364	0.126655		683.167	635.5	0.965908	0.908952
LYN	2749.17	2433	1.11311	0.0200432		1779.83	1514.17	1.04722	0.819125
CCL28	524.167	466.167	1.11219	0.550831		333.167	293.5	0.997863	0.995624
FADD	833.167	746.833	1.11045	0.336402		462.5	347.667	1.18221	0.270033
MMP9	203.833	183.333	1.11025	0.817375		149.167	113.167	1.03673	1
TAP2	1987.5	1712.83	1.10923	0.550869		1344.33	1130.33	1.07064	0.857311
SLIT2	193.5	167.667	1.10797	0.639575		184.5	176.667	0.963569	0.949617
TICAM1	769.5	666.5	1.10788	0.3445		213.167	169.5	1.11843	0.719979
TAPBP	5261	4769	1.10702	0.120451		3344.33	3219.83	0.942425	0.862871
RNF128	3612	3282.5	1.10505	0.25453		2620.5	2233.5	1.04306	0.92093
CXCL9	200.167	174.333	1.10428	0.710676		86	86.5	0.950353	0.92868
GATA3	70	62.6667	1.10384	0.366236		21.5	20.1667	0.965691	1
SOCS1	141.667	131.333	1.10342	0.587981		34	21.8333	1.20614	0.585962
HAVCR2	127.667	115.667	1.10297	0.424739		104	92.8333	0.985272	0.979427
TLR3	688.5	623.833	1.10281	0.479515		925.333	784.167	1.04024	0.938646
PTPRC	37.3333	32	1.10206	0.565684		2432	1766	1.14926	0.68029
TBK1	1239.83	1109.17	1.10131	0.0368351		939.333	787.5	1.06242	0.827708
SH2D1A	1.5	1	1.10127	0.74247		48.8333	32	1.22487	0.519104
IRAK4	713.667	648.167	1.10108	0.146301		556.5	483.333	1.02458	0.939715
VCAM1	533.167	472.667	1.10076	0.380121		614	524.167	1.03273	0.94909
IL1R1	656.667	610.333	1.09983	0.479092		868	820.667	0.945785	0.881399
IL1RN	1090.33	994	1.09871	0.846027		425.333	338.5	1.02663	0.959538
OAS2	267.667	238.833	1.09868	0.349687		332	314.167	0.955473	0.902443
CD180	200	173.667	1.09804	0.552337		141.167	130.5	0.965419	0.949617
PML	1323.83	1185	1.09767	0.173615		453.5	415.667	0.991238	0.987782
IFI16	663.667	590.333	1.09693	0.280924		467.667	465.333	0.914922	0.797385
IRAK2	166.333	149	1.09659	0.490259		129.667	100.5	1.13613	0.650004
ITCH	1379.67	1254.5	1.09659	0.10533		2495.83	2216.5	1.01227	0.959974
RELB	232.667	204.833	1.09621	0.457891		216.167	171.833	1.11397	0.769445
CSF2RA	229.167	212.5	1.09615	0.523425		109.833	95.1667	1.0036	0.993775
EGF	3.16667	2.5	1.09604	0.843898		4.83333	6.33333	0.914907	1
TRAF6	380.5	350.5	1.09479	0.228619		707.5	636.333	0.996206	0.990313
NOD2	69.5	60.3333	1.09395	0.624087		61.6667	52.6667	1.04177	0.941154
IL22	1	0.666667	1.09266	0.767121		na	na	na	na
IL23A	22.3333	19.5	1.09055	0.555342		9.66667	7.33333	1.07758	1
IFIT3	1054.17	935.833	1.09054	0.590296		738	592.333	1.1043	0.788675
STAT3	3444.17	3206.17	1.09025	0.275258		3286	2868.67	1.02244	0.954925
IL21	1.16667	0.5	1.08765	0.713178		na	na	na	na
NFKBIA	3073.5	2832.5	1.08678	0.116225		1804.17	1445.83	1.08352	0.795884
IFNAR2	845.5	764.5	1.08368	0.288813		296.5	287.667	0.936077	0.839564
CNTF	88.1667	82	1.08291	0.44608		39.1667	39.1667	0.920175	0.850335
IFNAR1	1960	1798.83	1.08151	0.0338678		1070.83	1015	0.948765	0.773715
CD40LG	165.833	147	1.08046	0.727095		52	45.8333	1.01116	0.987493
BMP2	638	598.833	1.07972	0.328668		469.5	393.167	1.05915	0.863358
IKBKB	934.833	854.667	1.07912	0.497274		770.667	703.833	0.983458	0.963899
PELI1	1229.83	1173.83	1.07521	0.453336		976.5	927.167	0.939696	0.841226
FBRSL1	1597.5	1460.33	1.07409	0.475141		369.833	297.667	1.09361	0.807892
NMI	1827.67	1631.67	1.07333	0.549129		407.833	390.667	0.947473	0.856306
OAS1	2591.17	2340.33	1.07261	0.514026		1142	969.667	1.04619	0.917874
CLEC7A	227.167	211.667	1.0726	0.514		142.667	110.333	1.09029	0.83267
TNFRSF14	5460.33	5035.67	1.07221	0.257761		1846	1394.17	1.17766	0.229341
HSPD1	14587.2	13122.7	1.07155	0.583919		3767.83	2869.5	1.16721	0.482806
UBE2N	1222.5	1120	1.07011	0.656688		933.5	881.167	0.966254	0.939622
IFNGR1	4400.67	4128.83	1.06889	0.406009		2747.17	2259.67	1.06222	0.868985
RAG1	48.6667	48	1.06726	0.752098		138.667	127.5	0.98808	0.985422
PRKCZ	2130.67	1996.5	1.0647	0.346221		1227.83	942.167	1.16277	0.374068
PSME2	336.833	308.333	1.06304	0.634628		2929	2278.67	1.14116	0.551296
RORC	937.5	864.833	1.06287	0.606593		649.833	532.833	1.08761	0.805937
PRKCG	21	18.3333	1.0624	0.824464		5	5.16667	0.96387	1
S1PR1	241.5	229	1.06088	0.542154		181.5	145.167	1.08112	0.827923
IRF3	1776.67	1629	1.05987	0.485078		635.333	512.333	1.11599	0.622661
CEBPB	163.833	152.667	1.05841	0.494922		268.5	190.833	1.22568	0.237268
CIITA	1127.33	1031.67	1.05678	0.818906		501.833	441.667	1.01168	0.987065
CCRL2	484.167	453.667	1.0563	0.576878		283.5	250.833	1.00276	0.994579
IRF5	313.333	302	1.05501	0.717164		254.833	207.5	1.07032	0.862759
CCR6	160.5	144.667	1.05026	0.751822		164.5	131.167	1.07477	0.869907
CDC42	12382	11769	1.04882	0.568596		3765.33	3239.83	1.04203	0.908226
DDX58	598	563.667	1.04861	0.666338		636.667	617	0.946887	0.892317
NFKB1	1279.5	1211.17	1.04799	0.471531		1044.83	1012	0.943559	0.758402
CCL8	2.5	2.33333	1.04622	0.910961		124.833	95	1.09076	0.83696
PSME1	14906.5	13886.2	1.04585	0.274812		3332.83	2605.17	1.1287	0.596135
BST2	1624.5	1529.33	1.04563	0.74669		243.833	166.167	1.23594	0.392238
IL17C	2.16667	2	1.04445	0.897929		na	na	na	na
STAT5A	542.667	505.167	1.04276	0.521965		369.167	329.5	1.01236	0.979641
JAK1	1799.17	1732.33	1.04132	0.461591		4105.5	3703.17	0.993607	0.979863
DGKZ	2571.5	2411.67	1.04112	0.673817		806.167	657.833	1.10444	0.66059
NR2C2	1205	1153.83	1.0409	0.45659		2263	2346.67	0.873656	0.392238
HLA-B	137608	132948	1.03964	0.748341		29031.5	20007.7	1.17658	0.620237
LY96	335.167	325.667	1.0391	0.766072		52.1667	44.6667	1.00589	0.992133
CXCR1	6.5	5.83333	1.03832	0.951683		na	na	na	na
CD27	818	768.833	1.03801	0.802884		220.167	168	1.12367	0.747968
ZNF446	288.667	273	1.03754	0.717533		139.833	116	1.07352	0.824002
CCL7	0.166667	0.166667	1.03574	0.825922		na	na	na	na
CRP	0	0.166667	1.03574	0.825922		na	na	na	na
IFNA14	0	0	1.03574	0.825922		na	na	na	na
IFNA16	0	0	1.03574	0.825922		na	na	na	na
IFNA2	0	0	1.03574	0.825922		na	na	na	na
IFNA4	0.166667	0	1.03574	0.825922		na	na	na	na
IFNA6	0	0	1.03574	0.825922		na	na	na	na
IFNA7	0	0	1.03574	0.825922		na	na	na	na
IFNA8	0	0	1.03574	0.825922		na	na	na	na
IFNW1	0	0	1.03574	0.825922		na	na	na	na
IL19	0	0	1.03574	0.825922		na	na	na	na
IL3	0.166667	0	1.03574	0.825922		na	na	na	na
IL31	0	0	1.03574	0.825922		na	na	na	na
IL9	0	0.166667	1.03574	0.825922		na	na	na	na
LEP	0	0.166667	1.03574	0.825922		na	na	na	na
IL24	0.166667	0	1.03574	0.825922		24.3333	19.8333	1.03458	1
MPL	0	0.166667	1.03574	0.825922		8.16667	9.5	0.887589	1
ZBTB22	503.333	474.333	1.03534	0.532065		311.833	248.333	1.11952	0.571372
AIMP1	1053.33	998.333	1.03471	0.809666		821.667	631.667	1.14273	0.570131
TP53INP1	1056.5	1017.67	1.03412	0.746586		1348.83	1328.33	0.918824	0.734686
NOTCH1	876.167	848	1.02956	0.816199		1031.17	997.333	0.95061	0.913311
TGFB1	32.5	32.1667	1.02936	0.884703		183.167	141.833	1.1273	0.703175
RAC1	7296.17	7089.83	1.02888	0.759119		1981.33	1643	1.06327	0.857311
CASP1	5751	5399.83	1.02805	0.863535		1786.33	1403.83	1.10594	0.788427
IRF6	1232.83	1210.17	1.02463	0.76239		2344.17	2096.17	1.01181	0.97488
CSF1	556.167	547.667	1.02416	0.768009		302.333	273.167	0.990846	0.985516
ELK1	502.833	475.833	1.02411	0.786845		311.833	277.333	1.01667	0.970228
SOCS5	410.333	399.833	1.02358	0.752055		356.5	359.667	0.897631	0.550625
TRAF3	739.5	702.833	1.0232	0.749756		790.833	646.333	1.09288	0.665443
SFTPD	4	3.83333	1.02317	0.941696		na	na	na	na
EIF2AK2	1589.33	1565.83	1.02062	0.746424		1015.33	1007.5	0.908399	0.515433
ADAR	4810.5	4686	1.017	0.756262		6303.67	5633.67	1.00944	0.976242
IRF9	1979.33	1866.67	1.01699	0.869223		842.167	730.667	1.03055	0.931933
ACKR2	75.6667	79.1667	1.01681	0.912677		13.3333	17.6667	0.819286	1
IL7	237	229.333	1.01636	0.885214		174.667	151.667	1.03478	0.948725
SIGIRR	1678.67	1595	1.01553	0.877019		536.667	419	1.1541	0.330937
IL23R	21.1667	20	1.01321	0.93242		27.1667	27.5	0.94276	0.913459
CCL14	999.833	989.5	1.01148	0.91121		169.667	140.667	1.05081	0.916394
RFX1	581.833	568.667	1.01083	0.92595		138.167	112.667	1.09075	0.803168
ACKR4	967	908.167	1.00985	0.930378		215	223.833	0.887495	0.697245
CBLB	968.333	953.5	1.0096	0.906326		660.5	719.5	0.835983	0.250824
IL4R	675.5	663.667	1.00885	0.934264		932.833	793.833	1.04745	0.893313
NOD1	142.833	141.167	1.00863	0.9086		189.167	170.5	0.996773	0.992926
IL13RA1	3219.67	3208.67	1.00825	0.834035		2915.17	2887.17	0.913465	0.715255
IRF7	982.5	939.833	1.00769	0.922747		418.5	330.667	1.11775	0.663058
FCER1A	251	260.333	1.00766	0.972731		123.5	97.6667	1.0637	0.906187
PPIL2	1544.5	1499.83	1.00588	0.942533		816.333	775	0.960141	0.906666
IRF2	2820.83	2730.17	1.00538	0.908301		937.667	847.667	0.995119	0.990319
POU2F2	94	91.3333	1.00277	0.985168		69.6667	57.1667	1.0505	0.927654
RELA	1629.33	1604.17	1.00225	0.971566		648.667	611.833	0.969444	0.939956
MAPK1	2594	2544.17	1.00035	0.995907		2818.17	2649.83	0.962012	0.830137
MAP3K7	945.5	922	0.999917	0.999008		935.833	908.333	0.933548	0.696375
EOMES	40.3333	37	0.999378	0.99835		21.8333	20.5	0.973266	1
TLR9	28.8333	27	0.998616	0.995505		19.1667	15.6667	1.03895	1
TNFRSF11B	104.667	95.3333	0.997885	0.99515		41.6667	48.8333	0.879061	0.753137
CASP8	1331	1289.5	0.996149	0.967749		632.667	579	0.981624	0.962423
IL10RA	397.667	400.167	0.99531	0.95293		614.833	440	1.19559	0.422604
NLRP3	51.8333	50.3333	0.993834	0.950586		79.8333	50.8333	1.26242	0.379244
TNFSF12	832.833	814.333	0.993201	0.92834		120.333	102.667	1.03739	0.938646
CXCL13	185.5	177	0.992683	0.984535		14.3333	18	0.929348	1
IFI44L	155.5	157.333	0.989806	0.957033		146	147.667	0.915349	0.836784
BCL2L1	3562.67	3538.5	0.989053	0.90028		1671.5	1466.67	1.03464	0.906666
EGFR	756.833	769.667	0.9884	0.908369		755.5	857.667	0.812518	0.228491
HLA-A	49965	50556.7	0.987561	0.922406		18967.8	14667.8	1.12345	0.658356
CCL25	20061.2	19575.5	0.986992	0.924827		4947.67	4062.67	1.08311	0.800627
IFNGR2	2529.5	2553.67	0.986867	0.880585		1390.5	1164.33	1.06485	0.84763
RIPK2	247.667	239.333	0.985271	0.863198		110	99.3333	1.00332	0.993045
CD47	2340	2320.5	0.984997	0.863555		1644.67	1498.33	0.99028	0.979427
IL17RE	1563.17	1563.17	0.984835	0.877223		729.833	637	1.03875	0.918755
C5	134.333	137.167	0.984164	0.966396		361.833	284.167	1.09965	0.827811
CX3CL1	161	161.167	0.9841	0.874963		89	71.5	1.08923	0.816494
CD81	5466.83	5421.33	0.982738	0.774715		989.333	834.5	1.0635	0.837533
KIAA0586	462.667	462	0.982558	0.833805		495.167	528.667	0.854752	0.238942
NCK1	381.833	380.167	0.981815	0.804859		294.5	273.5	0.965578	0.904572
CD28	100.667	97.6667	0.981445	0.895438		69.3333	73	0.90649	0.82038
THAP3	346.667	344.167	0.978479	0.790646		483.333	395	1.09848	0.637958
CCR10	229.167	230.333	0.978005	0.913244		42.1667	36.3333	1.00613	0.992133
CXCR4	613.333	607.667	0.976743	0.893071		241.5	184.5	1.08199	0.861061
CCR4	41.3333	39.5	0.974235	0.913068		14.6667	14	0.960045	1
NFRKB	498.833	507.833	0.973763	0.685099		742.167	674.333	0.993792	0.986498
PRKRA	992.5	978.833	0.973352	0.76912		524	526.833	0.912603	0.696375
IL1RAP	106.167	109.333	0.972568	0.787318		122.333	134.833	0.83797	0.460551
IL27RA	139.667	136.5	0.972203	0.846123		157	131.667	1.0665	0.869332
CEBPA	1383	1395.33	0.971362	0.762211		1246	1101.67	1.01961	0.954925
NFATC1	180.667	175.667	0.970381	0.734574		69	77.1667	0.857341	0.633425
LY86	167.667	169.667	0.967365	0.837204		59.3333	45.8333	1.10017	0.817687
TLR1	244.667	248.667	0.965101	0.754711		259.5	275	0.865769	0.531368
LGALS3	22617.7	23113.8	0.963102	0.783834		6939.83	5565.83	1.10661	0.771601
IL3RA	94.5	99	0.962734	0.676351		80.5	79.6667	0.920906	0.813355
TGFB3	111.667	108.667	0.9625	0.830776		134.667	129	0.956414	0.932332
GPI	9930.17	10295.7	0.96227	0.711448		5016.33	4875.83	0.939497	0.829308
CAV1	594.833	613.333	0.960833	0.536248		532.833	477.333	0.99117	0.984894
LRP1	3793.33	4165.33	0.960814	0.814681		6458.67	7325.83	0.856809	0.658748
PPIE	1557	1593.67	0.960249	0.60598		496.167	406.333	1.08461	0.735062
MET	703.667	720.333	0.959038	0.804772		1696.33	1855.33	0.869167	0.575535
CCL17	6.66667	6	0.95831	0.910113		na	na	na	na
CD274	122.333	117.5	0.958212	0.841824		109.833	87	1.08853	0.845473
CCL21	1007.5	988	0.957399	0.833587		234.5	233.833	0.929139	0.882032
HMGB1	5433.83	5567	0.955335	0.550317		879.667	682	1.13749	0.605958
LTB	907.667	869.167	0.953532	0.838596		98.5	59.5	1.25094	0.482056
LEPR	113.5	120.833	0.953331	0.683119		227.833	229.167	0.908708	0.787324
IFIT2	503.5	509.5	0.95144	0.749944		375.833	302	1.09492	0.810432
SPP1	140.167	148.333	0.950811	0.867557		64.5	55.3333	1.0124	0.98615
CCL20	332	329.333	0.950439	0.911885		49.1667	39.6667	1.02761	0.96156
IL9R	0.666667	0.833333	0.950236	0.86521		22.6667	22	0.961695	1
TIRAP	170.167	174	0.948818	0.585424		245.5	222	0.994383	0.987782
TNFSF13B	331.5	339.5	0.948284	0.602851		249.333	231.167	0.975799	0.955262
MPO	2	2	0.948103	0.861212		na	na	na	na
IFI27	9162	9570.5	0.947496	0.766477		1447.67	942.5	1.21958	0.545492
IL31RA	5.33333	6.16667	0.945546	0.843885		na	na	na	na
TNFSF13	2404.17	2544.83	0.942161	0.581618		781.167	715.667	0.984314	0.972852
IRF2BP1	749.5	778.667	0.938721	0.459777		439.333	375.5	1.05434	0.860069
CCL22	115.167	115.5	0.936229	0.802832		27.1667	32.8333	0.881125	0.754839
HIF1A	2961.33	3073	0.934186	0.402827		2284.33	2480	0.843821	0.292294
CD14	881	933.5	0.934077	0.501044		196.333	164	1.0543	0.899034
IL10	15.8333	16.6667	0.932179	0.773926		7.83333	8.5	0.934965	1
CDK2	619.833	631.333	0.931996	0.696097		411.5	375	1.00756	0.987934
ERBB2	4341.5	4646.33	0.931334	0.338358		4228.83	4010.67	0.958628	0.887037
CDKN1B	1976.33	2072.17	0.928879	0.367642		1615.67	1536.83	0.952017	0.857311
IFI44	436.333	447.667	0.928417	0.716109		272.833	240.5	1.01111	0.985422
IL11	5	5.33333	0.927297	0.776712		na	na	na	na
SYK	1211.5	1278	0.927236	0.477938		2548.33	2424.17	0.958217	0.869861
IL1B	90.3333	97.6667	0.925059	0.855691		32.1667	31	0.98833	0.98633
F3	1637.17	1762.17	0.924115	0.515265		1230.83	1239	0.904256	0.764687
CD276	529.667	549.333	0.922179	0.51016		302.833	313	0.912785	0.804489
BLNK	2621.83	2778	0.922095	0.393652		866.167	871.333	0.917396	0.771601
NR4A1	474.667	538.5	0.921576	0.894625		322.167	383.5	0.950861	1
VEGFA	2141.67	2278.83	0.921275	0.307191		1748.33	1530.17	1.01808	0.967886
CCL15	462.333	487.5	0.919742	0.480508		446.167	358.833	1.0904	0.804695
CXCL14	10399.2	11347	0.918052	0.506699		2961.17	2777.67	0.941089	0.882982
TNFSF10	3426.17	3592.83	0.917466	0.539982		2589.17	2736.83	0.896406	0.764687
ITGAM	74.5	79	0.917251	0.506482		95.3333	95	0.925193	0.861569
TP53	1507	1579.17	0.916363	0.498668		706.167	703.833	0.935953	0.856815
NODAL	1.66667	1.83333	0.915475	0.832573		12.1667	15.5	0.847299	1
PDCD1	34	33.6667	0.914513	0.741325		26.1667	16.8333	1.18227	1
HDAC9	251.5	260.333	0.913806	0.332055		264	266.167	0.899167	0.694552
IL20	0.166667	0.5	0.910809	0.595194		na	na	na	na
IL17F	1.33333	1.33333	0.906862	0.812006		na	na	na	na
INHA	4.83333	5.16667	0.905872	0.780157		na	na	na	na
GZMA	1118.17	1305.17	0.904959	0.755491		337.667	271.167	1.0475	0.934159
MICA	352.667	384.5	0.903261	0.391212		314.5	301.333	0.941095	0.865957
CKLF	1022.5	1100.83	0.902253	0.345703		278.667	222.333	1.1203	0.487053
TMEM173	457	482	0.90091	0.374829		205.833	197.167	0.950895	0.906511
MIF	10817.2	11852.3	0.898654	0.432616		1218.67	1114.83	1.00223	0.994823
MBL2	0.666667	0.5	0.89859	0.586277		na	na	na	na
FOXP1	1503.67	1623.17	0.897773	0.128335		1308.67	1449.67	0.832145	0.190061
FAS	497.833	527.167	0.895604	0.385759		339.667	361.667	0.894405	0.737668
IL4	2.16667	2.66667	0.894033	0.732693		na	na	na	na
CCL1	0.333333	0.333333	0.892468	0.583299		na	na	na	na
CXCL6	524.5	587.667	0.891398	0.566025		119.667	106.5	0.987877	0.985516
MYC	1112	1196.83	0.891045	0.631513		877.333	896	0.940685	0.903044
CCL19	170.667	159.833	0.887616	0.737281		21.8333	21.8333	0.964909	1
C5AR1	37	42	0.885287	0.417774		16	17.3333	0.904648	1
SELL	67	71.5	0.88491	0.618136		49.8333	53.5	0.912703	0.844857
TLR6	28.1667	30.5	0.884408	0.490841		137.167	136.5	0.910775	0.764919
CXCL1	468.167	541	0.870038	0.330438		121.333	132.167	0.858343	0.626249
IFNE	87.1667	103.167	0.86983	0.441599		23.5	31.1667	0.781528	0.379881
LIF	209.5	231.167	0.867963	0.304288		243.333	246.333	0.915337	0.796686
CCL4	342	384.167	0.86705	0.669186		21	13.8333	1.11014	1
GZMB	60	69.6667	0.863912	0.583386		12.1667	11.8333	0.959806	1
HLA-G	367.167	456.167	0.853343	0.593933		102.667	84.8333	1.0449	0.939622
ID2	3189.83	3678.67	0.852345	0.0490692		1121.33	1164	0.894014	0.703282
TNFSF11	22	24	0.848301	0.496187		15.3333	14.3333	0.987622	1
IFITM3	7460.33	8567.17	0.845918	0.0968191		512.333	492.833	0.947397	0.867706
IFI6	2032.33	2270.5	0.842927	0.343603		549.833	677.5	0.807303	0.452031
PPARG	2321.67	2730.33	0.840879	0.115256		1019.83	1122.33	0.842246	0.448833
IL33	361.5	386.167	0.84021	0.725444		246.333	346.667	0.872814	0.719833
FPR1	3.16667	3.5	0.837691	0.640838		25.6667	24.5	0.950294	1
IL5RA	49.1667	58	0.836837	0.481163		49.5	57.5	0.837592	0.596352
C3	409.833	451.333	0.835989	0.574005		490.833	590.833	0.908517	0.827287
RUNX1	767	892	0.83559	0.0767831		430.333	535.667	0.76827	0.172123
C16orf13	1550.17	1732.33	0.835148	0.19604		298.667	272.667	0.996868	0.993312
ACKR3	428.5	544.333	0.833017	0.303388		134.833	125.667	0.959297	0.940768
BCL6	385.333	467.333	0.826478	0.102611		201.167	220.667	0.841279	0.450203
CCL2	530.167	618.667	0.820759	0.309788		133.5	163.667	0.84856	0.654177
BMP7	139.833	161.833	0.819502	0.333348		100.667	116.167	0.834972	0.512408
TGFB2	19.8333	25.3333	0.806858	0.302278		23.6667	31.8333	0.771607	0.34828
TLR5	73.5	90.5	0.7985	0.117157		85	94.6667	0.83975	0.508049
IFITM2	2780	3331.17	0.790181	0.100268		181.667	183.5	0.909448	0.791975
JUN	3123.17	4117.33	0.785784	0.363108		1535.17	1727.5	0.850998	0.606609
FOSL1	97	118.833	0.777796	0.710305		18.8333	19.3333	0.979213	1
IL17RB	534.333	644.833	0.774511	0.160795		393	459.333	0.829959	0.504498
CCL23	20.8333	24.1667	0.772037	0.328128		na	na	na	na
IFITM1	5537.83	7100.67	0.764696	0.0993552		692.5	780	0.846019	0.561834
IL6	4.33333	5.66667	0.76414	0.358279		na	na	na	na
CCR3	65	82.1667	0.763164	0.116793		26.1667	29.6667	0.868349	0.717996
CD1C	87.8333	106.667	0.754258	0.254681		39.5	40.6667	0.915831	0.840671
CCL18	314.833	421	0.749179	0.426018		62.1667	67.1667	0.908636	0.831502
TLR10	29.5	35	0.745315	0.383795		57.6667	76.5	0.830522	0.596135
IL12B	1.33333	1.83333	0.739711	0.242923		na	na	na	na
IL17A	5	6.66667	0.733665	0.576806		na	na	na	na
IL20RB	9.66667	13.8333	0.733139	0.159498		9.83333	9.83333	0.959179	1
CSF3	1	2	0.73084	0.62363		na	na	na	na
CD1B	5.16667	6.16667	0.729657	0.341065		na	na	na	na
CD44	4103.83	5414.17	0.715534	0.0253893		2407.83	3672.17	0.667464	0.0260176
APCS	0	1	0.710442	0.388528		na	na	na	na
CD1A	5.5	7	0.709802	0.382121		2.5	4.66667	0.876244	1
PTGS2	58.5	79.8333	0.700148	0.475485		66.6667	109.5	0.782705	1
CCL13	848.167	1144.17	0.698018	0.357155		223.167	287.667	0.831995	0.602388
FOXP3	6.16667	8.33333	0.697461	0.233134		19.5	18.1667	0.987812	1
IL13	0.5	1.33333	0.694322	0.468326		na	na	na	na
CTLA4	16.6667	22	0.686489	0.247349		8.66667	9.33333	0.926	1
CRLF2	11	16.1667	0.664887	0.105779		7	7.66667	0.932419	1
INHBA	58	88.6667	0.659177	0.213313		27	29.3333	0.903737	0.816758
CX3CR1	35.8333	53.5	0.655344	0.157365		36.3333	41.6667	0.879973	0.754419
MMP3	2.66667	4.16667	0.655237	0.399066		255.667	156.333	1.09442	0.802775
CCL11	719.167	1013.17	0.648236	0.0691998		182.5	306.667	0.68223	0.11952
BMP4	811.5	1218.67	0.637229	0.0329102		298	390.667	0.768083	0.271744
CLEC4C	1.66667	2.5	0.629255	0.388907		na	na	na	na
LYZ	74665.8	110760	0.628856	0.0897261		71698.2	119764	0.784305	0.418796
SELE	5.5	9	0.628719	0.187343		5.33333	5.33333	0.972975	1
CCL3	141.5	231.333	0.617137	0.393132		28	36.8333	0.882973	0.752419
CCL27	2	3.16667	0.616327	0.0304417		na	na	na	na
TNFRSF8	12.1667	18.8333	0.610439	0.0516967		9.16667	10.8333	0.896152	1
CXCL8	53.8333	86.3333	0.601979	0.21098		na	na	na	na
EGR3	43.8333	72.6667	0.601073	0.442931		15.6667	36.1667	0.777411	1
MS4A1	88	122.333	0.577813	0.253177		79.8333	147	0.88078	0.653511
THBS1	30.3333	48.5	0.563981	0.185305		1191.17	1502.67	0.797665	0.431832
CXCR5	5.33333	8	0.557862	0.239984		18.6667	22.6667	0.892898	1
OSM	3.16667	6	0.552191	0.00990201		na	na	na	na
CXCL2	71.8333	121.667	0.547524	0.153071		12.5	21.6667	0.786052	1
CCR7	25.8333	40.5	0.543448	0.104582		14.8333	21.3333	0.792399	1
SLC11A1	1.16667	2.83333	0.443599	0.0456707		20.3333	17.8333	1.00989	1
STAT6	503.667	1294.67	0.439738	0.226936		3657.83	3150.33	1.04303	0.886733
SOCS3	170	385.833	0.421268	0.302293		130	269.167	0.788534	1
EGR2	48.5	118.833	0.40001	0.239269		21.6667	48.8333	0.729939	0.223715
ADIPOQ	0	2	0.394469	0.215883		na	na	na	na
CXCL3	41.5	102.833	0.368038	0.135231		11.8333	23.6667	0.736418	1
FOS	3377.33	9478.17	0.341542	0.357173		1766.67	5230	0.835829	1
EGR1	332.667	1059	0.308969	0.323465		137.667	382	0.79195	1
CXCL5	31	134.667	0.226942	0.000764761		13.5	47.1667	0.653789	0.0562012
